# Supplementary material for: Ritter-enabled catalytic asymmetric chloroamidation of olefins
Source: Royal Society of Chemistry journal article supplement (doi:10.1039/d0sc05224h), 2020-12-08

## Supporting Information

### Ritter-Enabled Catalytic Asymmetric Chloroamination of Olefins

Daniel C. Steigerwald, Bardia Soltanzadeh, Aritra Sarkar, Cecilia C. Morgenstern,  
Richard J. Staples, Babak Borhan\*

Michigan State University, Department of Chemistry, East Lansing, MI, 48824.

## Table of Contents:

|                                                                                                                                                                                         |    |
|-----------------------------------------------------------------------------------------------------------------------------------------------------------------------------------------|----|
| Supporting Information.....                                                                                                                                                             | 1  |
| I Materials and General Instrumentations: .....                                                                                                                                         | 3  |
| II General Procedures with DCDMH.....                                                                                                                                                   | 3  |
| a. General procedure for the catalytic asymmetric chloroamidation of unsaturated amides with DCDMH to yield vicinal chloroamides. ....                                                  | 3  |
| b. Procedure for the catalytic asymmetric chloroamidation of <b>1a</b> with DCDMH and 10 equivalents of acetonitrile to yield vicinal chloroamides. ....                                | 4  |
| c. Procedure for the chloroamidation of allyl-phthalimide ( <b>1j</b> ) and allyl-ester ( <b>1k</b> ) substrates. ....                                                                  | 5  |
| d. Procedure for the 1 mmol scale catalytic asymmetric chloroamidation of unsaturated amides with DCDMH to yield vicinal chloroamides. ....                                             | 5  |
| e. General procedure for the chloroamidation of allyl-amides with different nitrile solvents. ....                                                                                      | 6  |
| III General Procedure for the Catalytic Asymmetric Chloroamidation of Unsaturated Amides with Dichloramine-T as the Chlorinating Reagent to Yield Vicinal Chlorosulfonylamidines: ..... | 7  |
| IV Procedure for the synthesis of enantiomeric mixtures of chloroamide compounds for HPLC separations.....                                                                              | 7  |
| V Procedure for the synthesis of enantiomeric mixtures of chloroamidine compounds for HPLC separations .....                                                                            | 8  |
| VI Catalyst Loading Study for Less Reactive Allyl-Amide <b>1v</b> : .....                                                                                                               | 9  |
| VII Structural Determination of Ritter Trapped Product: .....                                                                                                                           | 10 |
| VIII Catalyst Control of Product Formation: .....                                                                                                                                       | 14 |
| IX Procedure for the Determination of the Absolute and Relative Stereochemistry of Vicinal Chlorosulfonylamidine Products:.....                                                         | 14 |
| X Analytical Data: .....                                                                                                                                                                | 16 |
| a. Analytical data for vicinal chloroamide products:.....                                                                                                                               | 16 |
| b. Analytical data for vicinal chloroamidine products:.....                                                                                                                             | 38 |
| c. Analytical data for derivatives: .....                                                                                                                                               | 42 |
| d. Analytical data for miscellaneous products/byproducts:.....                                                                                                                          | 45 |
| e. Analytical data for starting materials: .....                                                                                                                                        | 48 |
| f. HPLC traces: .....                                                                                                                                                                   | 54 |
| XI References: .....                                                                                                                                                                    | 86 |
| XII NMR Spectra: .....                                                                                                                                                                  | 87 |

## I Materials and General Instrumentations:

Commercially available reagents were purchased from Sigma-Aldrich or Alfa-Aesar and used as received. CH<sub>2</sub>Cl<sub>2</sub> and acetonitrile were freshly distilled over CaH<sub>2</sub> prior to use. THF was distilled over sodium-benzophenone ketyl. All other solvents were used as purchased. DCDMH was purified by recrystallization in chloroform. Dichloramine-T was purchased from TCI and used without further purification. Enantiomeric excess for all products was determined by HPLC analysis using DAICEL Chiralcel® OJ-H and OD-H or Chiralpak® IA, AD-H, and AS-H columns. Optical rotations of all products were measured in chloroform. Allyl amides **1a**, **1f**, **1h**, **1i**, **1m-p**, **1r**, **1s**, **1u**, **1v** were synthesized as reported previously and analytical data matched reported values.<sup>1</sup> Substrates **1b-e**, **1g**, **1k**, **1l**, **1q**, **1t**, **1u**, **1x** were synthesized by the same procedure described for substrates above, and provided overall yields ranging from 40-60%. Analytical data for the new substrates can be found below in Section VIIIe.

## II General Procedures with DCDMH.

### a. General procedure for the catalytic asymmetric chloroamidation of unsaturated amides with DCDMH to yield vicinal chloroamides.

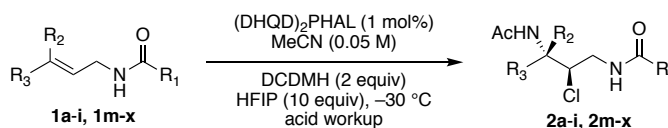

The substrate (**1a-i**, **1m-x**) (0.1 mmol, 1.0 equiv) and (DHQD)<sub>2</sub>PHAL (0.8 mg, 1 mol%) were suspended in acetonitrile (2 mL) in a test tube with a magnetic stir bar and capped with a rubber septa. HFIP (105 μL, 1.0 mmol, 10 equiv) was added via syringe. The resulting suspension was cooled to -30 °C in an immersion cooler. After stirring for 10 min, DCDMH (39.4 mg, 0.2 mmol, 2 equiv) was added. The reaction was monitored by TLC and upon completion was quenched by the addition of saturated Na<sub>2</sub>S<sub>2</sub>O<sub>3</sub> (2 mL). The reaction was concentrated to remove acetonitrile and the resultant aqueous layer was extracted with DCM (3 x 5 mL). The combined organics were concentrated. To the concentrated vial with a stir bar, acetonitrile (1 mL) and a solution of HCl (1 M, 0.2 mL) were added and stirred for 5 min. Water (3 mL) was added and the solution was

concentrated in vacuo and extracted with DCM (3 x 5 mL). The combined organic layers were dried with anhydrous Na<sub>2</sub>SO<sub>4</sub> and concentrated. Column chromatography (SiO<sub>2</sub>/EtOAc–Hexanes gradient) provided the desired product (**2a-i**, **2m-x**).

**b. Procedure for the catalytic asymmetric chloroamidation of 1a with DCDMH and 10 equivalents of acetonitrile to yield vicinal chloroamides.**

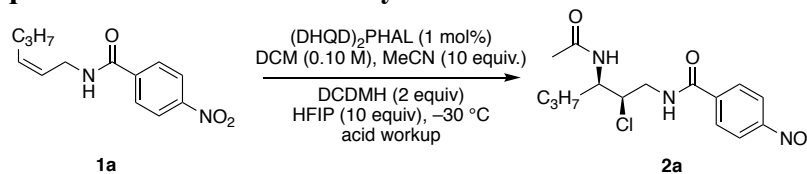

The substrate **1a** (12.4 mg, 0.05 mmol, 1.0 equiv) and (DHQD)<sub>2</sub>PHAL (0.4 mg, 1 mol%) were suspended in dichloromethane (0.5 mL) in a test tube with a magnetic stir bar and capped with a rubber septa. HFIP (50 μL, 0.50 mmol, 10 equiv) and acetonitrile (26 μL, 0.50 mmol, 10 equiv) were added via syringe. The resulting suspension was cooled to -30 °C in an immersion cooler. After stirring for 10 min, DCDMH (19.7 mg, 0.10 mmol, 2 equiv) was added. The reaction was monitored by TLC and upon completion was quenched by the addition of saturated Na<sub>2</sub>S<sub>2</sub>O<sub>3</sub> (2 mL). The resultant aqueous layer was extracted with DCM (3 x 5 mL). The combined organics were concentrated. To the concentrated vial with a stir bar, acetonitrile (1 mL) and a solution of HCl (1 M, 0.2 mL) were added and stirred for 15 min. Water (3 mL) was added and the solution was concentrated in vacuo and extracted with DCM (3 x 5 mL). The combined organic layers were dried with anhydrous Na<sub>2</sub>SO<sub>4</sub> and concentrated. Column chromatography (SiO<sub>2</sub>/EtOAc–Hexanes gradient) provided the desired product **2a** (53% yield with triphenylmethane NMR standard, 99% *ee*).

**c. Procedure for the chloroamidation of allyl-phthalimide (**1j**) and allyl-ester (**1k**) substrates.**

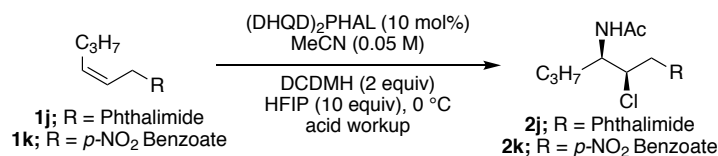

The substrate (**1j**, **1k**) (0.1 mmol, 1.0 equiv) and (DHQD)<sub>2</sub>PHAL (7.8 mg, 10 mol%) were suspended in acetonitrile (2 mL). HFIP (105 μL, 1.0 mmol, 10 equiv) was added via a syringe. The resulting suspension was cooled to 0 °C in an immersion cooler. After stirring for 10 min, DCDMH (39.4 mg, 0.2 mmol, 2 equiv) was added. Upon completion, the reaction was quenched by the addition of saturated Na<sub>2</sub>S<sub>2</sub>O<sub>3</sub> (2 mL). The reaction was concentrated to remove the acetonitrile and the resultant aqueous layer was extracted with DCM (3 x 5 mL). The combined organics were concentrated. To the concentrated product in the vial with a stir bar, acetonitrile (1 mL) and a solution of HCl (1 M, 0.2 mL) were added and stirred for 15 min. Water (3 mL) was added and the solution was concentrated and extracted with DCM (3 x 4 mL). The combined organic layers were dried with anhydrous Na<sub>2</sub>SO<sub>4</sub> and concentrated. Column chromatography (SiO<sub>2</sub>/EtOAc–Hexanes gradient) provided the desired product (**2j**, **2k**).

**d. Procedure for the 1 mmol scale catalytic asymmetric chloroamidation of unsaturated amides with DCDMH to yield vicinal chloroamides.**

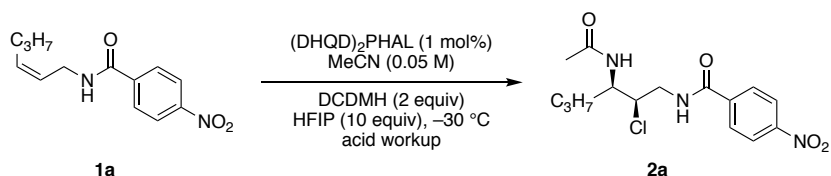

The substrate **1a** (248.0 mg, 1.0 mmol, 1.0 equiv) and (DHQD)<sub>2</sub>PHAL (7.8 mg, 1 mol%) were suspended in acetonitrile (20 mL) in a test tube with a magnetic stir bar and capped with a rubber septa. HFIP (1.05 mL, 10.0 mmol, 10 equiv) was added via syringe. The resulting suspension was cooled to -30 °C in an immersion cooler. After stirring for 10 min, DCDMH (394.0 mg, 2 mmol, 2 equiv) was added. The reaction was monitored by TLC and upon completion was quenched by the addition of saturated Na<sub>2</sub>S<sub>2</sub>O<sub>3</sub> (10 mL). The reaction was concentrated to remove acetonitrile and the resultant aqueous layer was

extracted with DCM (3 x 10 mL). The combined organics were concentrated. To the concentrated vial with a stir bar, acetonitrile (5 mL) and a solution of HCl (1 M, 1 mL) were added and stirred for 15 min. Water (3 mL) was added and the solution was concentrated in vacuo and extracted with DCM (3 x 5 mL). The combined organic layers were dried with anhydrous Na<sub>2</sub>SO<sub>4</sub> and concentrated. Column chromatography (SiO<sub>2</sub>/EtOAc–Hexanes gradient) provided the desired product **2a** (282.0 mg, 83% yield, 99% *ee*).

**e. General procedure for the chloroamidation of allyl-amides with different nitrile solvents.**

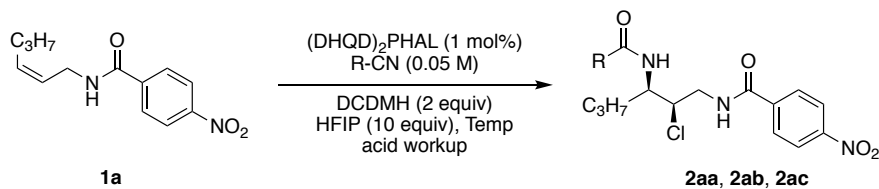

The substrate **1a** (24.8 mg, 0.1 mmol, 1.0 equiv) and (DHQD)<sub>2</sub>PHAL (0.8 mg, 1 mol%) were suspended in a nitrile solvent (2 mL) in a test tube with a magnetic stir bar and capped with a rubber septa. HFIP (105 μL, 1.0 mmol, 10 equiv) was added via syringe. The reaction mixtures were then cooled to a temperature to accommodate the freezing point of the solvent (**2aa**: –30 °C, **2ab**: 0 °C, **2ac**: 23 °C). After stirring for 10 min, DCDMH (39.4 mg, 0.2 mmol, 2 equiv) was added. The reaction was monitored by TLC and upon completion was quenched by the addition of saturated Na<sub>2</sub>S<sub>2</sub>O<sub>3</sub> (2 mL). The resultant aqueous layer was extracted with DCM (3 x 5 mL). The combined organics were concentrated. To the concentrated vial with a stir bar, acetonitrile (1 mL) and a solution of HCl (1 M, 0.2 mL) were added and stirred for 15 min. Water (3 mL) was added and the solution was concentrated in vacuo and extracted with DCM (3 x 5 mL). The combined organic layers were dried with anhydrous Na<sub>2</sub>SO<sub>4</sub> and concentrated. Column chromatography (SiO<sub>2</sub>/EtOAc–Hexanes gradient) provided the desired product (**2aa**, **2ab**, **2ac**).

### III General Procedure for the Catalytic Asymmetric Chloroamidination of Unsaturated Amides with Dichloramine-T as the Chlorinating Reagent to Yield Vicinal Chlorosulfonylamidines:

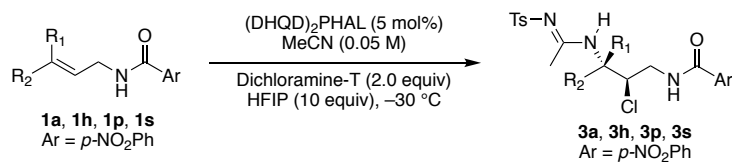

The substrate (**1a, 1h, 1p, 1s**) (0.1 mmol, 1.0 equiv) and  $(\text{DHQD})_2\text{PHAL}$  (3.9 mg, 5 mol%) were suspended in acetonitrile (2 mL) in a test tube with a magnetic stir bar and capped with a rubber septa. HFIP (105  $\mu\text{L}$ , 1.0 mmol, 10 equiv) was added via syringe. The resulting suspension was cooled to  $-30\text{ }^\circ\text{C}$  in an immersion cooler. After stirring for 10 min dichloramine-T (48.0 mg, 0.2 mmol, 2 equiv) was added. The reaction was monitored by TLC and upon completion was quenched by the addition of saturated  $\text{Na}_2\text{S}_2\text{O}_3$  (2 mL). The reaction was concentrated to remove acetonitrile and the resultant aqueous layer was extracted with DCM (3 x 5 mL). The combined organic layers were dried with anhydrous  $\text{Na}_2\text{SO}_4$  and concentrated. Column chromatography ( $\text{SiO}_2/\text{EtOAc}$ –Hexanes gradient) provided the desired product (**3a, 3h, 3p, 3s**).

### IV Procedure for the synthesis of enantiomeric mixtures of chloroamide compounds for HPLC separations

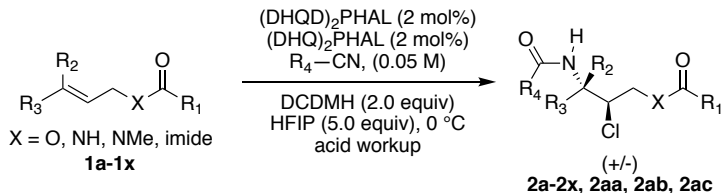

The enantiomeric mixtures used for HPLC analysis in determining enantiopurity were synthesized as follows by using the quasi-enantiomeric cinchona alkaloid dimers.

The substrate (**1a-1x**, 0.05 mmol, 1.0 equiv),  $(\text{DHQD})_2\text{PHAL}$  (0.8 mg, 2 mol%), and  $(\text{DHQ})_2\text{PHAL}$  (0.8 mg, 2 mol%) were placed in a test tube with a magnetic stir bar and dissolved in the nitrile solvent of choice (1 mL), capped with a rubber septa. HFIP (25  $\mu\text{L}$ , 0.25 mmol, 5 equiv) was added via a syringe. The resulting suspension was cooled

to 0 °C in an immersion cooler. After stirring for 10 min, DCDMH (19.7 mg, 0.1 mmol, 2 equiv) was added. The reaction was monitored by TLC and upon completion was quenched by the addition of saturated Na<sub>2</sub>S<sub>2</sub>O<sub>3</sub> (2 mL). The reaction was concentrated to remove acetonitrile and the resultant aqueous layer was extracted with DCM (3 x 5 mL). The combined organics were concentrated under reduced pressure. To the concentrated vial with a stir bar, acetonitrile (1 mL) and a solution of HCl (1 M, 0.2 mL) were added and stirred for 5 min. Water (3 mL) was added and the solution was concentrated in vacuo and extracted with DCM (3 x 5 mL). The combined organic layers were dried with anhydrous Na<sub>2</sub>SO<sub>4</sub> and concentrated. Column chromatography (SiO<sub>2</sub>/EtOAc-Hexanes gradient) provided the desired products as mixture of enantiomers (**2a-2x**, **2aa**, **2ab**, **2ac**).

## V Procedure for the synthesis of enantiomeric mixtures of chloroamidine compounds for HPLC separations

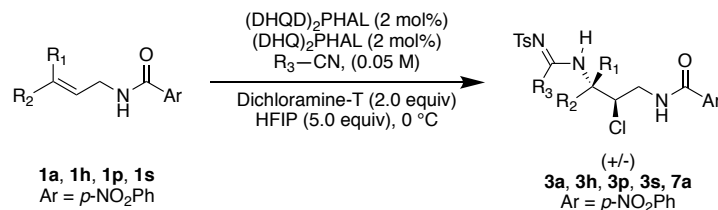

The enantiomeric mixtures used for HPLC analysis in determining enantiopurity were synthesized as follows by using the quasi-enantiomeric cinchona alkaloid dimers.

The substrate (**1a**, **1h**, **1p**, **1s**, (0.05 mmol, 1.0 equiv), (DHQD)<sub>2</sub>PHAL (0.8 mg, 2 mol%), and (DHQ)<sub>2</sub>PHAL (0.8 mg, 2 mol%) were placed in a test tube with a magnetic stir bar and dissolved in the nitrile solvent of choice (1 mL), capped with a rubber septa. HFIP (25 μL, 0.25 mmol, 5 equiv) was added via syringe. The resulting suspension was cooled to 0 °C in an immersion cooler. After stirring for 10 min, Dichloramine-T (24.0 mg, 0.1 mmol, 2 equiv) was added. The reaction was monitored by TLC and upon completion was quenched by the addition of saturated Na<sub>2</sub>S<sub>2</sub>O<sub>3</sub> (2 mL). The reaction was concentrated to remove acetonitrile and the resultant aqueous layer was extracted with DCM (3 x 5 mL). The combined organic layers were dried with anhydrous Na<sub>2</sub>SO<sub>4</sub> and



concentrated. Column chromatography (SiO<sub>2</sub>/EtOAc-Hexanes gradient) provided the desired products as mixture of enantiomers (**3a**, **3h**, **3p**, **3s**, **7a**).

## VI Catalyst Loading Study for Less Reactive Allyl-Amide **1v**:

**Table S1.** Catalyst loading studies with **1a** and **1v**

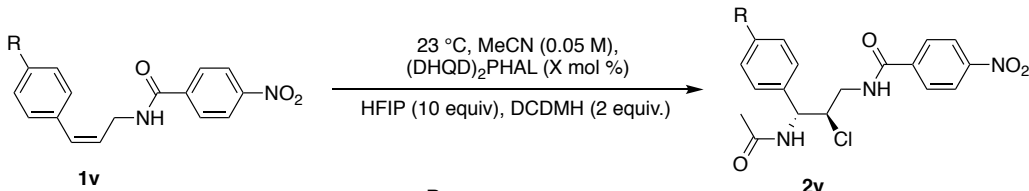

**1v** → **2v**

| Entry | R               | (DHQD) <sub>2</sub> PHAL (mol %) | ee (%) |
|-------|-----------------|----------------------------------|--------|
| 1     | H               | 1                                | 99     |
| 2     | CF <sub>3</sub> | 1                                | 54     |
| 3     | CF <sub>3</sub> | 5                                | 90     |
| 4     | CF <sub>3</sub> | 10                               | 93     |

  



**1a** → **2a**

| Entry | (DHQD) <sub>2</sub> PHAL % | catalyst/DCDMH exposure time | Yield (%) | ee |
|-------|----------------------------|------------------------------|-----------|----|
| 1     | 1                          | None                         | 76        | 99 |
| 2     | 1                          | 48 h                         | 48        | 1  |
| 3     | 0                          | NA                           | 0         | NA |

Optimization studies for **1a** showed no decrease in enantioselectivity when the catalyst loading was decreased from 10 mol% to 1 mol%. Many aryl-substituted substrates (**1s**, **1u**, **1w**, **1x**) were compatible with these conditions and returned products with enantiomeric excess greater than 90%. When these reaction conditions were extended to the less reactive substrate **1v**, the enantiomeric excess decreased to 53% and the rate of the reaction decreased significantly relative to the other aryl substrates (48 h relative to 6 h). When catalyst loading was increased to 5 mol%, modest levels of enantioselectivity were restored. We hypothesized that the decrease in enantiocontrol may be the result of catalyst degradation under reaction conditions. To test this hypothesis, we subjected (DHQD)<sub>2</sub>PHAL to reaction conditions for 48 h at room temperature. After 48 h, the reaction mixture was cooled to -30 °C and **1a** was added (note **1a** leads to the product **2a** in 99% *ee* under optimized conditions). These conditions provided nearly racemic product.

Nonetheless, the catalyst is still necessary to form the product as no reaction was observed without catalyst.

## VII Structural Determination of Ritter Trapped Product:

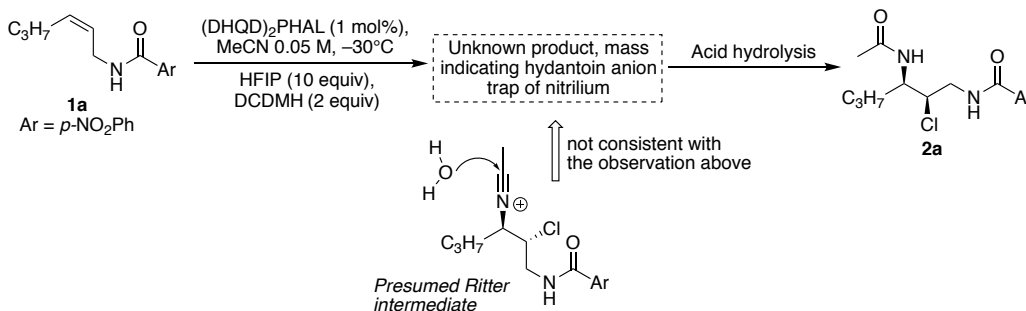

Early studies of reaction conditions on **1a** revealed that the transformation was not proceeding through a traditional Ritter-type pathway, which would undergo a nitrilium trap by water and provide **2a**. Interestingly, mass spectrometry revealed the reaction was undergoing a nitrilium trap by 3-chloro-5,5-dimethylhydantoin, the residue left after chlorenium transfer. The <sup>1</sup>H NMR was complicated, hinting at multiple products, none of which were identified as **2a**. This trapped product underwent hydrolysis to provide the amide products described in the main text. This observation leads to ambiguity of which potential nucleophilic center or centers on the chlorenium donor attacked the nitrilium cation as it could be the nitrogen atom, or either of the carbonyl oxygen atoms (see structures **2a'**, **S1**, and **S2** in figure below).

The acid lability of the Ritter intermediate obtained from acetonitrile made analysis of the intermediate challenging. The Ritter intermediate formed when pivalonitrile was employed as a nucleophile was stable under column chromatography (SiO<sub>2</sub>/EtOAc–Hexanes gradient) and provided two products that could be isolated and analyzed by NMR. These

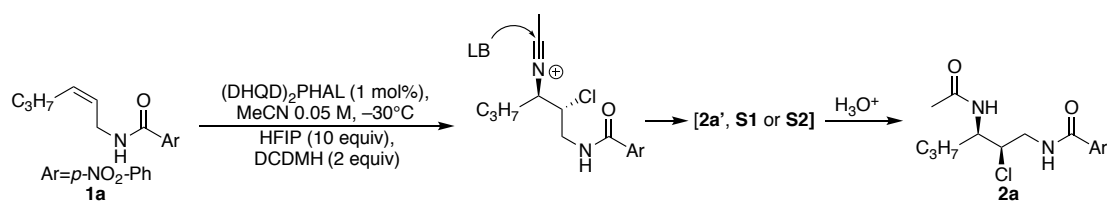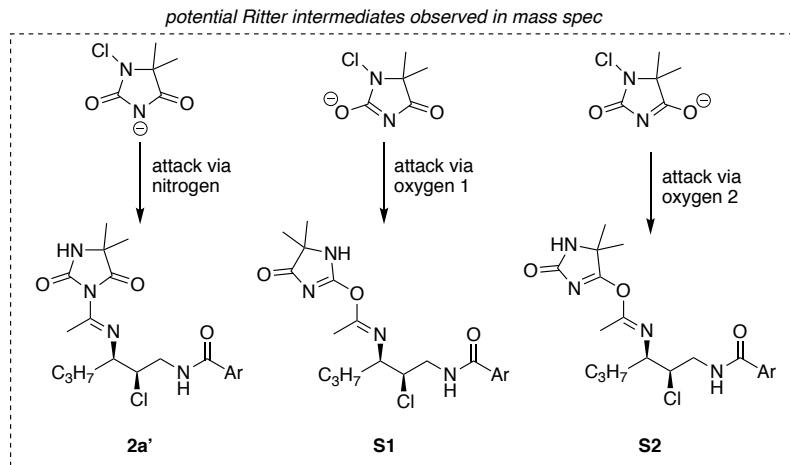

two products were determined to be in equilibrium with each other as 30 min after initial isolation, the formerly pure products began to interconvert back to being the original mixture. This led to the hypothesize that a single product with two roto-isomeric structures such as **S3a** and **S3b** were isolated. Interestingly, **S4**, obtained from the reaction of **1a** with pivalonitrile, with NCS as the chloronium source exhibits only one rotomeric product, owing to its symmetrical nature. This provides further proof that the mixture obtained above is in fact due to rotomeric equilibria, and not the result of having a mix of products as a result of nitrogen and oxygen atoms as nucleophiles.

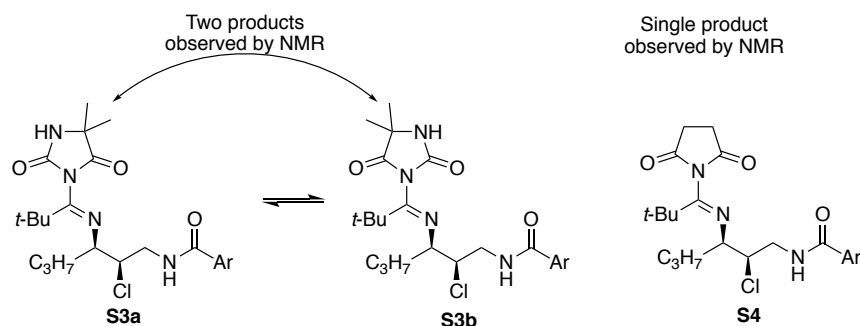

To conclusively determine the structure of the Ritter intermediates, experimentally observed <sup>13</sup>C resonances were compared to those obtained for **S4** and also computationally calculated chemical shifts anticipated for all scenarios. Comparison of the observed <sup>13</sup>C

NMR to a computationally generated (EDF2-6-31g\*) NMR of simplified substrates (**S3a/b** analog, **S1**-analog, and **S2**-analog) were used to predict the structure of the Ritter intermediate. The oxygen atom attack analogs (**S1** and **S2**), lead to resonances that do not fit the observed chemical shifts for **S3a/b**. The validity of the computed chemical shifts were corroborated with examples from the literature for accuracy. The computed chemical shift for C3 in the **S1**-analog (190.2 ppm) is much further downfield as compared to other carbonyl carbons in the series investigated. Fortuitously, a similarly situated carbonyl carbon shown in structure **S5** has a chemical shift in the same range,<sup>2</sup> thus corroborating the calculations. The experimentally observed resonances for **S4**, along with the calculated chemical shifts for **S3a/b** analog fit well with the observed chemical shifts for **S3a** and **S3b**, thus suggesting that not only the nitrogen atom is the nucleophilic participant, but also, the observed mixture is, as described above, a consequence of a rotameric equilibrium.

**Table S2.** Experimental (**S3a**, **S3b**, and **S4**) and calculated <sup>13</sup>C-NMR values for potential Ritter intermediates

|                                  | <b>S3a</b> | <b>S3b</b> | <b>S4</b> | <b>S3a/b</b> -analog | <b>S1</b> -analog | <b>S2</b> -analog |
|----------------------------------|------------|------------|-----------|----------------------|-------------------|-------------------|
| <sup>13</sup> C-resonances (ppm) |            |            |           |                      |                   |                   |
| C1                               | 155.4      | 155.3      | 156.5     | 151.7                | 153.3             | 151.7             |
| C2                               | 175.3      | 153.5      | 175.1     | 173.5                | 176.3             | 179.0             |
| C3                               | 154.9      | 177.0      | 176.6     | 155.6                | 190.2             | 166.0             |

*outlier chemical shifts*

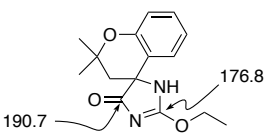

**S5**  
known chemical shifts  
see reference 2

Computational details for NMR calculations:

All calculations presented in this article were performed using the Spartan'18 (Spartan 18; Wavefunction Inc.: Irvine, CA) software package. NMR calculations for **S1**-analog, **S2**-analog, and **S3a/b**-analog commenced with finding optimum geometry using a MonteCarlo search function. The best conformer was then subject to DFT optimization at the B3LYP/6-31G\* level. The geometry optimized structures were then recalculated with EDF2-6-31G\* to obtain NMR values. The table below lists the calculated  $^{13}\text{C}$ -NMR values for the three analogs.

**Table S3.**  $^{13}\text{C}$ -Chemical shifts for **S3a/b** and **S1/S2**-analog

|   | 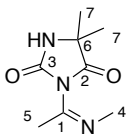 |  |  |
|---|-----------------------------------------------------------------------------------|-----------------------------------------------------------------------------------|------------------------------------------------------------------------------------|
|   | <b>S3a/b</b> -analog                                                              | <b>S1</b> -analog                                                                 | <b>S2</b> -analog                                                                  |
| 1 | 151.7                                                                             | 153.3                                                                             | 151.7                                                                              |
| 2 | 173.5                                                                             | 176.3                                                                             | 179.0                                                                              |
| 3 | 155.6                                                                             | 190.2                                                                             | 166.0                                                                              |
| 4 | 40.6                                                                              | 36.4                                                                              | 35.6                                                                               |
| 5 | 22.4                                                                              | 19.3                                                                              | 18.5                                                                               |
| 6 | 57.3                                                                              | 63.9                                                                              | 58.0                                                                               |
| 7 | 25.5                                                                              | 24.5                                                                              | 24.5                                                                               |

## VIII Catalyst Control of Product Formation:

**Table S4.** Catalyzed vs non-catalyzed chloroamidation in absence and presence of water.

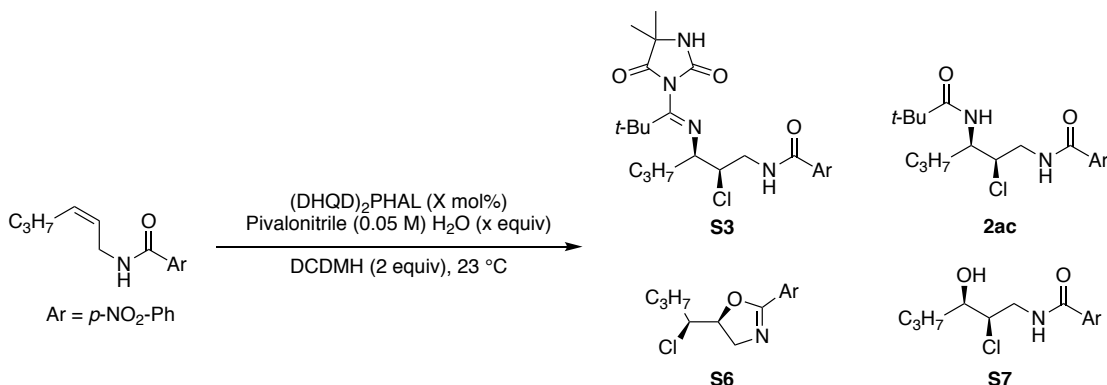

| Entry | Catalyst loading (mol %) | H <sub>2</sub> O (equiv) | S3:2ac:S6:S7 |
|-------|--------------------------|--------------------------|--------------|
| 1     | 0                        | 0                        | 0:37:63:0    |
| 2     | 10                       | 0                        | 83:6:11:0    |
| 3     | 10                       | 10                       | 64:11:11:14  |
| 4     | 10                       | 20                       | 31:5:4:60    |
| 5     | 10                       | 40                       | 25:5:4:66    |

As discussed in Section VII, under standard reaction conditions the Lewis base of the chlorenium donor traps the nitrilium ion intermediate (entry 1) to yield **S3** before acid workup. However, when **1a** was exposed to pivalonitrile and DCDMH without (DHQD)<sub>2</sub>PHAL (entry 2), **S3** was not observed. In fact, Ritter product **2ac**, the result of trapping the nitrilium ion by water, along with the cyclized **S6**, product of the non-Ritter intramolecular pathway were isolated. This divergent reaction path hints at an associative complex between the (DHQD)<sub>2</sub>PHAL and DCDMH.<sup>3</sup>

## IX Procedure for the Determination of the Absolute and Relative Stereochemistry of Vicinal Chlorosulfonylamidine Products:

The absolute and relative stereochemistry of chloroamide products **2c** and **2i** were determined by single crystal X-ray diffraction. The stereochemistry of other chloroamide products were inferred. We were unable to obtain crystals for vicinal chlorosulfonylamidine products and resorted to chemical transformations. We observed that the Ritter intermediate **2a'** obtained from the hydantoin mediated reaction could be converted to the sulfonylamidine product **3a** with the addition of para-toluene sulfonamide (10 equiv) in a stereoretentive reaction. The HPLC trace for **3a** obtained by the procedure

described in Section III and the HPLC trace of presumed **3a**, obtained via the derivatization of **2a'** matched, and thus confirmed the absolute stereochemistry of **3a** as illustrated. The relative and absolute stereochemistries of **3h**, **3p**, **3s**, **4h**, **5a**, **6a**, **7a**, and **8a** were inferred as a result of this observation.

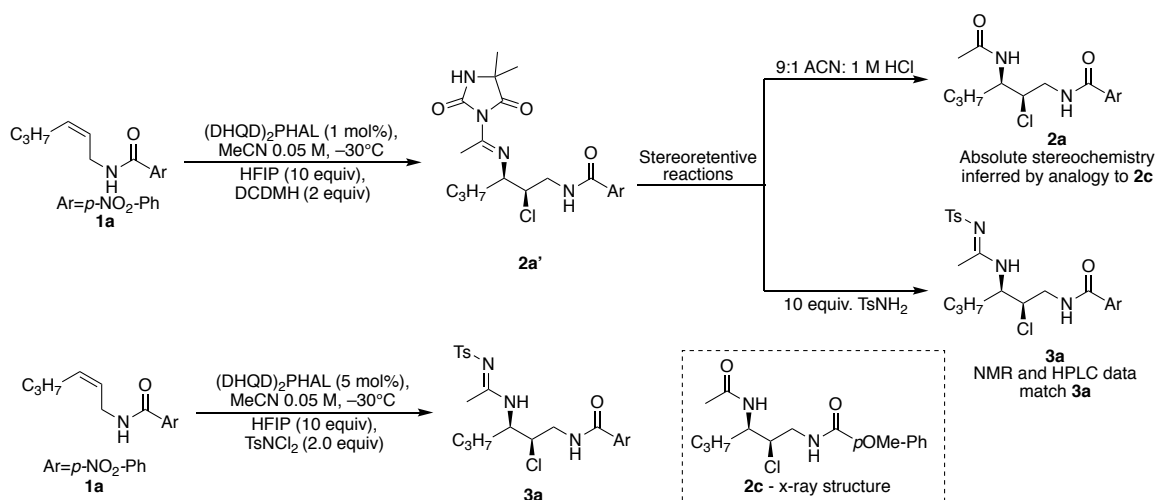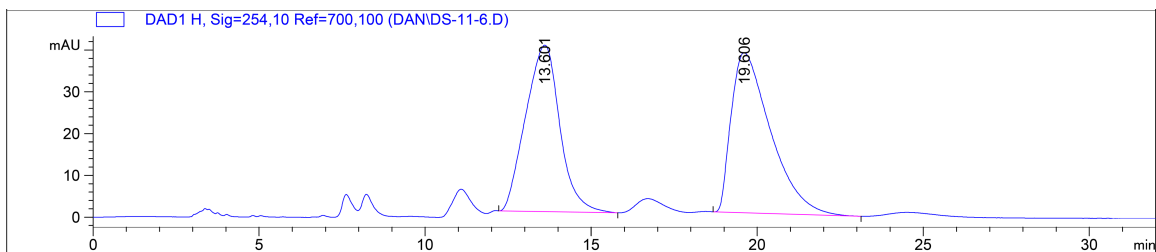

HPLC trace of **3a** and *ent*-**3a**

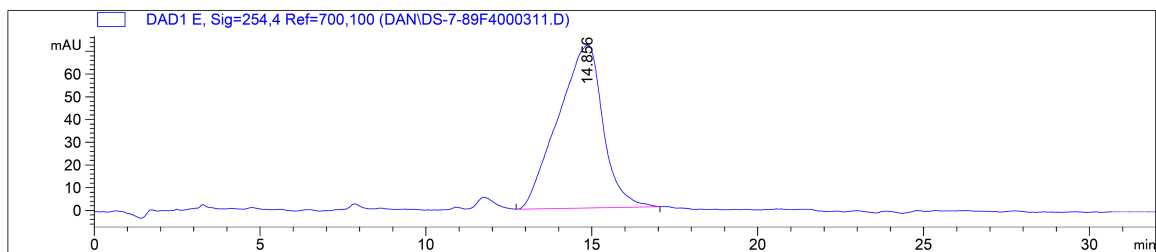

HPLC trace of **3a** following procedure for the chlorosulfonylamidation of allyl amides.

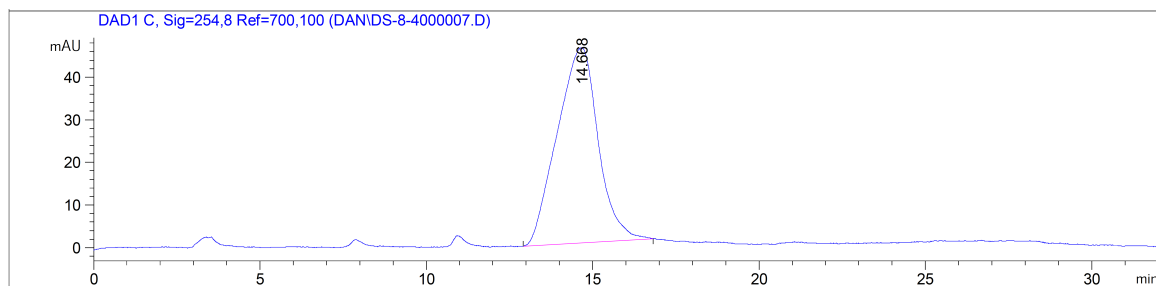

HPLC trace of **3a** obtained from derivatization of **2a'**

## X Analytical Data:

### a. Analytical data for vicinal chloroamide products:

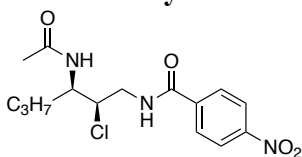

**2a**, *N*-((2*R*,3*R*)-3-acetamido-2-chlorohexyl)-4-nitrobenzamide

Compound **2a** (30.7 mg, 90% yield, 99% *ee*) was synthesized following the procedure detailed in Section **IIa** using **1a** (24.8 mg, 0.10 mmol) as starting material.

*R*<sub>f</sub>: 0.14 (60% EtOAc/Hex)

<sup>1</sup>H NMR (500 MHz, CDCl<sub>3</sub>) δ 8.35 – 8.27 (m, 3H), 8.08 (d, *J* = 8.6 Hz, 2H), 5.72 (d, *J* = 9.3 Hz, 1H), 4.38 – 4.25 (m, 2H), 4.13 (ddd, *J* = 11.0, 5.2, 1.7 Hz, 1H), 2.93 (ddd, *J* = 13.7, 11.0, 4.3 Hz, 1H), 2.15 (s, 3H), 1.67 (dtd, *J* = 13.8, 8.6, 6.7 Hz, 1H), 1.61 – 1.52 (m, 1H), 1.41 – 1.32 (m, 2H), 0.90 (t, *J* = 7.3 Hz, 3H).

<sup>13</sup>C NMR (126 MHz, CDCl<sub>3</sub>) δ 172.2, 164.8, 149.7, 139.2, 128.4, 123.9, 61.2, 49.4, 42.6, 34.7, 23.3, 19.3, 13.7.

**Resolution of enantiomers:** DAICEL Chiralpak®, AD-H 10% IPA/Hexane 1ml/min, 254 nm, RT 1 (major)=10.6 min, RT 2 (minor) =12.6 min.

**HRMS analysis (ESI):** calculated for [M+H]<sup>+</sup>: C<sub>15</sub>H<sub>21</sub>ClN<sub>3</sub>O<sub>4</sub>: 342.1221; Found: 342.1223

**Optical activity:** [α]<sub>D</sub><sup>20</sup> = -35.2 (c = 0.4, CHCl<sub>3</sub>, 99% *ee*)



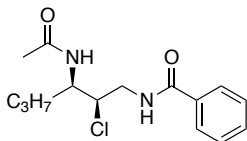

**2b**, *N*-((2*R*,3*R*)-3-acetamido-2-chlorohexyl)benzamide

Compound **2b** (24.1 mg, 81% yield, 98% *ee*) was synthesized following the procedure detailed in Section **IIa** using **1b** (20.3 mg, 0.10 mmol) as starting material.

R<sub>f</sub>: 0.16 (50% EtOAC/Hex)

**<sup>1</sup>H NMR (500 MHz, CDCl<sub>3</sub>)** δ 8.00 (dd, *J* = 8.7, 4.5 Hz, 1H), 7.92 (d, *J* = 7.0 Hz, 2H), 7.51 (t, *J* = 7.3 Hz, 1H), 7.46 (t, *J* = 7.4 Hz, 2H), 5.69 (d, *J* = 9.4 Hz, 1H), 4.43 – 4.22 (m, 2H), 4.15 (ddd, *J* = 10.8, 5.1, 1.7 Hz, 1H), 2.93 (ddd, *J* = 13.6, 10.8, 4.5 Hz, 1H), 2.14 (s, 3H), 1.69 – 1.60 (m, 1H), 1.54 (dtd, *J* = 13.6, 7.9, 5.5 Hz, 1H), 1.36 (dq, *J* = 15.0, 7.6 Hz, 2H), 0.90 (t, *J* = 7.4 Hz, 3H).

**<sup>13</sup>C NMR (126 MHz, CDCl<sub>3</sub>)** δ 171.8, 167.0, 133.7, 131.7, 128.6, 127.1, 61.7, 49.2, 42.5, 34.8, 23.2, 19.2, 13.7.

**Resolution of enantiomers:** DAICEL Chiralpak®, AD-H 10% IPA/Hexane 1ml/min, 254nm, RT 1 (major)=8.8 min, RT 2 (minor) =10.2 min.

**HRMS analysis (ESI):** calculated for [M+H]<sup>+</sup>: C<sub>15</sub>H<sub>22</sub>ClN<sub>2</sub>O<sub>2</sub>: 297.1370; Found: 297.1369

**Optical Activity:** [α]<sub>D</sub><sup>20</sup> = -31.2 (c = 0.40, CHCl<sub>3</sub>, 98% *ee*)

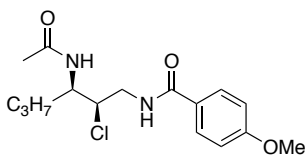

**2c**, *N*-((2*R*,3*R*)-3-acetamido-2-chlorohexyl)-4-methoxybenzamide

Compound **2c** (29.0 mg, 89% yield, 99% *ee*) was synthesized following the procedure detailed in Section **IIa** using **1c** (22.3 mg, 0.10 mmol) as starting material.

R<sub>f</sub>: 0.12 (50% EtOAC/Hex)

**<sup>1</sup>H NMR (500 MHz, CDCl<sub>3</sub>)** δ 7.93 – 7.81 (m, 3H), 6.95 (d, *J* = 8.9 Hz, 2H), 5.58 (d, *J* = 9.5 Hz, 1H), 4.38 – 4.24 (m, 2H), 4.14 (ddd, *J* = 10.8, 5.2, 1.7 Hz, 1H), 3.85 (s, 3H), 2.90 (ddd, *J* = 13.7, 10.8, 4.5 Hz, 1H), 2.14 (s, 3H), 1.68 – 1.60 (m, 1H), 1.54 (dtd, *J* = 13.7, 7.9, 5.5 Hz, 1H), 1.37 (ddd, *J* = 15.0, 8.0, 6.4 Hz, 2H), 0.90 (t, *J* = 7.4 Hz, 3H).

$^{13}\text{C}$  NMR (126 MHz,  $\text{CDCl}_3$ )  $\delta$  171.8, 166.6, 162.3, 129.0, 126.0, 113.8, 61.8, 55.4, 49.2, 42.4, 34.8, 23.3, 19.3, 13.7.

**Resolution of enantiomers:** DAICEL Chiralpak®, IA 10% IPA/Hexane 1ml/min, 254 nm, RT 1 (major)=13.9 min, RT 2 (minor) =17.8 min.

**HRMS analysis (ESI):** calculated for  $[\text{M}+\text{H}]^+$ :  $\text{C}_{16}\text{H}_{24}\text{ClN}_2\text{O}_3$ : 327.1476; Found: 327.1475

**Optical activity:**  $[\alpha]_{\text{D}}^{20} = -19.8$  ( $c = 0.10$ ,  $\text{CHCl}_3$ , 99% *ee*)

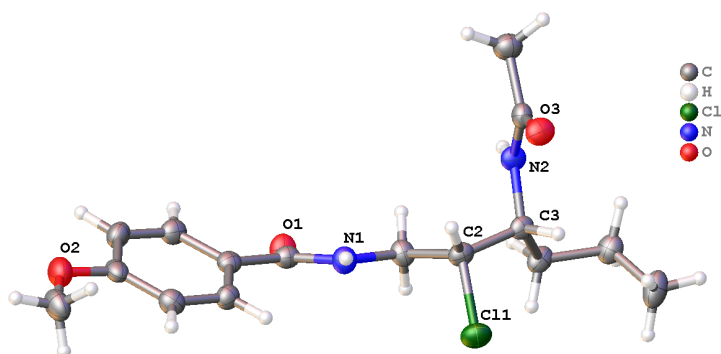

Single colorless needle-shaped crystals of **2c** were obtained from a mixture of methanol and hexanes by slow evaporation in a silicone coated NMR tube.

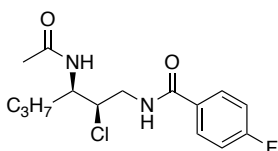

**2d**, *N*-((2*R*,3*R*)-3-acetamido-2-chlorohexyl)-4-fluorobenzamide

Compound **2d** (26.7 mg, 85% yield, 99% *ee*) was synthesized following the procedure detailed in Section **IIa** using **1d** (22.1 mg, 0.10 mmol) as starting material.

$R_f$ : 0.25 (50% EtOAc/Hex)

$^1\text{H}$  NMR (500 MHz,  $\text{CDCl}_3$ )  $\delta$  8.01 (dd,  $J = 8.6, 4.4$  Hz, 1H), 7.93 (dd,  $J = 8.8, 5.3$  Hz, 2H), 7.13 (t,  $J = 8.6$  Hz, 2H), 5.69 (d,  $J = 9.4$  Hz, 1H), 4.35 – 4.25 (m, 2H), 4.13 (ddd,  $J = 10.9, 5.1, 1.7$  Hz, 1H), 2.90 (ddd,  $J = 13.6, 10.9, 4.4$  Hz, 1H), 2.14 (s, 3H), 1.70 – 1.59 (m, 1H), 1.60 – 1.49 (m, 1H), 1.41 – 1.30 (m, 2H), 0.90 (t,  $J = 7.4$  Hz, 3H).

$^{13}\text{C}$  NMR (126 MHz,  $\text{CDCl}_3$ )  $\delta$  171.9, 165.9, 164.9 (d,  $J = 251.8$  Hz).

129.9 (d,  $J = 3.0$  Hz), 129.5 (d,  $J = 9.0$  Hz), 115.7 (d,  $J = 21.9$  Hz), 61.5, 49.2, 42.5, 34.8, 23.3, 19.3, 13.7.

**<sup>19</sup>F NMR (470 MHz, CDCl<sub>3</sub>)** δ -108.06.

**Resolution of enantiomers:** DAICEL Chiralpak®, IA 5% IPA/Hexane 1ml/min, 254 nm, RT 1 (major)=20.9 min, RT 2 (minor) =22.1 min.

**HRMS analysis (ESI):** calculated for [M+H]<sup>+</sup>: C<sub>15</sub>H<sub>21</sub>ClN<sub>2</sub>O<sub>2</sub>: 315.1276; Found: 315.1274

**Optical Activity:** [α]<sub>D</sub><sup>20</sup> = -23.9 (c = 0.10, CHCl<sub>3</sub>, 99% ee)

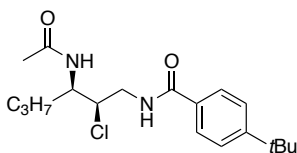

**2e**, *N*-((2*R*,3*R*)-3-acetamido-2-chlorohexyl)-4-(*tert*-butyl)benzamide

Compound **2e** (27.8 mg, 79% yield, 99% ee) was synthesized following the procedure detailed in Section **IIa** using **1e** (25.9 mg, 0.10 mmol) as starting material.

R<sub>f</sub>: 0.21 (70% EtOAC/Hex)

**<sup>1</sup>H NMR (500 MHz, CDCl<sub>3</sub>)** δ 7.92 (s, 1H), 7.84 (d, *J* = 8.6 Hz, 2H), 7.47 (d, *J* = 8.6 Hz, 2H), 5.59 (s, 1H), 4.37 – 4.24 (m, 2H), 4.19 – 4.05 (m, 1H), 2.91 (ddd, *J* = 13.6, 10.8, 4.5 Hz, 1H), 2.13 (s, 3H), 1.68 – 1.58 (m, 1H), 1.53 (dtd, *J* = 13.6, 7.9, 5.5 Hz, 1H), 1.38-1.32 (m, 2H), 1.32 (s, 9H), 0.89 (t, *J* = 7.3 Hz, 3H).

**<sup>13</sup>C NMR (126 MHz, CDCl<sub>3</sub>)** δ 171.7, 166.9, 155.1, 130.9, 127.0, 125.6, 61.8, 49.2, 42.4, 34.9, 34.9, 31.2, 23.3, 19.3, 13.7.

**Resolution of enantiomers:** DAICEL Chiralpak®, IA 10% IPA/Hexane 1ml/min, 254nm, RT 1 (major)=8.2 min, RT 2 (minor) =11.7 min.

**HRMS analysis (ESI):** calculated for [M+H]<sup>+</sup>: C<sub>19</sub>H<sub>30</sub>ClN<sub>2</sub>O<sub>2</sub>: 353.1996; Found: 353.1989

**Optical activity:** [α]<sub>D</sub><sup>20</sup> = -27.1 (c = 0.10, CHCl<sub>3</sub>, 99% ee)

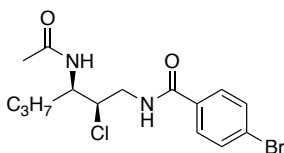

**2f**, *N*-((2*R*,3*R*)-3-acetamido-2-chlorohexyl)-4-bromobenzamide

R<sub>f</sub>: 0.21 (50% EtOAC/Hex)

Compound **2f** (34.2 mg, 91% yield, 99% *ee*) was synthesized following the procedure detailed in Section **IIa** using **1f** (28.2 mg, 0.10 mmol) as starting material.

**<sup>1</sup>H NMR (500 MHz, CDCl<sub>3</sub>)** δ 8.04 (dd, *J* = 8.6, 4.7 Hz, 1H), 7.78 (d, *J* = 8.5 Hz, 2H), 7.59 (d, *J* = 8.5 Hz, 2H), 5.65 (d, *J* = 9.4 Hz, 1H), 4.29 (ddd, *J* = 13.7, 8.8, 5.2 Hz, 2H), 4.12 (ddd, *J* = 10.9, 5.1, 1.7 Hz, 1H), 2.90 (ddd, *J* = 13.5, 10.9, 4.4 Hz, 1H), 2.14 (s, 3H), 1.70 – 1.59 (m, 1H), 1.54 (dtd, *J* = 13.6, 7.8, 5.5 Hz, 1H), 1.36 (h, *J* = 7.5 Hz, 2H), 0.90 (t, *J* = 7.3 Hz, 3H).

**<sup>13</sup>C NMR (126 MHz, CDCl<sub>3</sub>)** δ 171.9, 166.0, 132.5, 131.9, 128.8, 126.5, 61.5, 49.2, 42.5, 34.8, 23.3, 19.3, 13.7.

**Resolution of enantiomers:** DAICEL Chiralpak®, AD-H 15% IPA/Hexane 1ml/min, 254 nm, RT 1 (major)=6.1 min, RT 2 (minor)=7.6 min.

**HRMS analysis (ESI):** calculated for [M+H]<sup>+</sup>: C<sub>15</sub>H<sub>21</sub>BrClN<sub>2</sub>O<sub>2</sub>: 375.0475; Found: 375.0473

**Optical activity:** [α]<sub>D</sub><sup>20</sup> = -13.2 (c = 0.40, CHCl<sub>3</sub>, 99% *ee*)

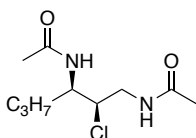

**2g**, *N,N'*-((2*R*,3*R*)-2-chlorohexane-1,3-diyl)diacetamide

Compound **2g** (13.6 mg, 58% yield, 94% *ee*) was synthesized following the procedure detailed in Section **IIa** using **1g** (14.1 mg, 0.10 mmol) as starting material.

**<sup>1</sup>H NMR (500 MHz, CDCl<sub>3</sub>)** δ 6.93 (s, 1H), 5.57 (d, *J* = 9.5 Hz, 1H), 4.25 (tdd, *J* = 9.2, 5.6, 1.5 Hz, 1H), 4.07 – 3.90 (m, 2H), 2.85 – 2.68 (m, 1H), 2.07 (s, 3H), 2.00 (s, 3H), 1.67 – 1.57 (m, 1H), 1.58 – 1.48 (m, 1H), 1.36 (h, *J* = 7.4 Hz, 2H), 0.92 (t, *J* = 7.3 Hz, 3H).

**<sup>13</sup>C NMR (126 MHz, CDCl<sub>3</sub>)** δ 171.4, 170.4, 61.9, 49.0, 42.39, 35.9, 23.3, 23.2, 19.2, 13.7.

**Resolution of enantiomers:** DAICEL Chiralcel®, OD-H 8% IPA/Hexane 1 ml/min, 214 nm, RT 1 (minor)=10.5 min, RT 2 (major)=11.6 min.

**HRMS analysis (ESI):** calculated for [M+H]<sup>+</sup>: C<sub>10</sub>H<sub>20</sub>ClN<sub>2</sub>O<sub>2</sub>: 235.1213; Found: 235.1208

**Optical activity:**  $[\alpha]_{\text{D}}^{20} = -22.3$  ( $c = 0.10$ ,  $\text{CHCl}_3$ , 94% *ee*)

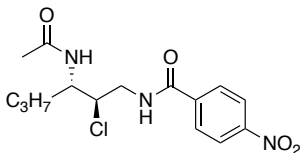

**2h**, *N*-((2*R*,3*S*)-3-acetamido-2-chlorohexyl)-4-nitrobenzamide

Compound **2h** (27.7 mg, 81% yield, 97% *ee*) was synthesized following the procedure detailed in Section **IIa** using **1h** (24.8 mg, 0.10 mmol) as starting material.

R<sub>f</sub>: 0.16 (50% EtOAC/Hex)

**<sup>1</sup>H NMR (500 MHz, C<sub>2</sub>D<sub>6</sub>SO)**  $\delta$  9.05 (t,  $J = 5.7$  Hz, 1H), 8.33 (d,  $J = 8.8$  Hz, 2H), 8.06 (d,  $J = 8.8$  Hz, 2H), 7.98 (d,  $J = 8.4$  Hz, 1H), 4.23 (dt,  $J = 8.3, 4.9$  Hz, 1H), 4.08 – 3.99 (m, 1H), 3.70 (dt,  $J = 14.0, 5.2$  Hz, 1H), 3.48 (ddd,  $J = 14.3, 8.4, 6.1$  Hz, 1H), 1.85 (s, 3H), 1.61 (dddd,  $J = 12.9, 9.6, 6.7, 2.9$  Hz, 1H), 1.51 – 1.41 (m, 1H), 1.41 – 1.32 (m, 1H), 1.29 – 1.13 (m, 1H), 0.86 (t,  $J = 7.3$  Hz, 3H).

**<sup>13</sup>C NMR (126 MHz, C<sub>2</sub>D<sub>6</sub>SO)**  $\delta$  169.5, 164.8, 149.1, 149.8, 128.7, 123.7, 64.8, 50.6, 43.2, 30.8, 22.5, 18.8, 13.7.

**Resolution of enantiomers:** DAICEL Chiralpak®, AD-H 10% IPA/Hexane 1ml/min, 254 nm, RT 1 (minor)=10.8 min, RT 2 (major)=12.0 min. (97% *ee*)

**HRMS analysis (ESI):** calculated for  $[\text{M}+\text{H}]^+$ : C<sub>15</sub>H<sub>21</sub>ClN<sub>3</sub>O<sub>4</sub>: 342.1221; Found: 342.1220.

**Optical activity:**  $[\alpha]_{\text{D}}^{20} = +63.3$  ( $c = 0.4$ ,  $\text{CHCl}_3$ , 97% *ee*)

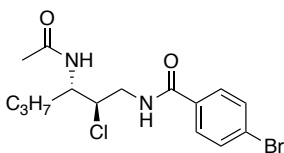

**2i**, *N*-((2*R*,3*S*)-3-acetamido-2-chlorohexyl)-4-bromobenzamide

Compound **2i** (22.1 mg, 59% yield, 95% *ee*) was synthesized following the procedure detailed in Section **IIa** using **1i** (28.2 mg, 0.10 mmol) as starting material.

R<sub>f</sub>: 0.23 (70% EtOAC/Hex)

**<sup>1</sup>H NMR (500 MHz, DMSO-*d*<sub>6</sub>)**  $\delta$  8.80 (t,  $J = 5.7$  Hz, 1H), 7.97 (d,  $J = 8.4$  Hz, 1H), 7.78 (d,  $J = 8.7$  Hz, 2H), 7.70 (d,  $J = 8.5$  Hz, 2H), 4.22 (dt,  $J = 8.1, 5.0$  Hz, 1H), 4.06 – 3.97

(m, 1H), 3.68 (dt,  $J = 14.0, 5.3$  Hz, 1H), 3.44 (ddd,  $J = 14.2, 8.2, 6.1$  Hz, 1H), 1.85 (s, 3H), 1.62 (dddd,  $J = 12.8, 9.5, 6.6, 2.9$  Hz, 1H), 1.51 – 1.42 (m, 1H), 1.36 (dd,  $J = 6.5, 3.1$  Hz, 1H), 1.28 – 1.18 (m, 1H), 0.7 (t,  $J = 7.3$  Hz, 3H).

$^{13}\text{C}$  NMR (126 MHz, DMSO- $d_6$ )  $\delta$  169.5, 165.5, 133.3, 131.4, 129.3, 125.1, 64.9, 50.5, 43.0, 30.8, 22.5, 18.8, 13.7.

**Resolution of enantiomers:** DAICEL Chiralpak®, ad-h 10% IPA/Hexane 1ml/min, 254 nm, RT 1 (major)=8.1 min, RT 2 (minor) =10.2 min.

**HRMS analysis (ESI):** calculated for  $[\text{M}+\text{H}]^+$ :  $\text{C}_{15}\text{H}_{21}\text{BrClN}_2\text{O}_2$ : 375.0475; Found: 375.0477

**Optical activity:**  $[\alpha]_{\text{D}}^{20} = +32.8$  ( $c = 0.1$ ,  $\text{CHCl}_3$ , 96% *ee*)

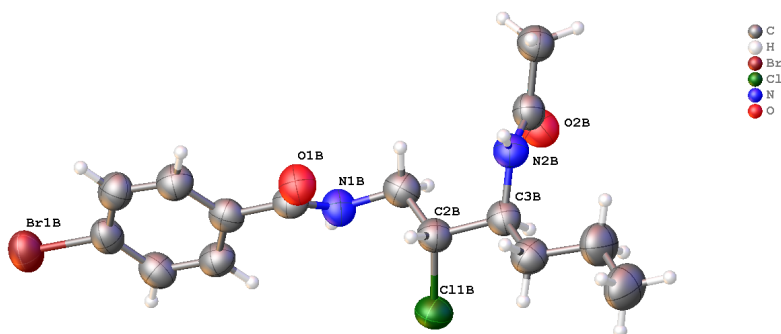

Single colorless needle-shaped crystals of **2i** were recrystallized from a mixture of dichloromethane and hexanes by slow evaporation in a silicone coated NMR tube.

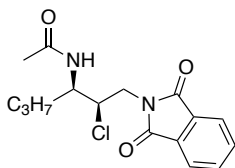

**2j**, *N*-((2*R*,3*R*)-2-chloro-1-(1,3-dioxisoindolin-2-yl)hexan-3-yl)acetamide

Compound **2j** (19.1 mg, 67% yield, 29% *ee*) was synthesized following the procedure detailed in Section **IIb** using **1j** (22.9 mg, 0.10 mmol) as starting material.

$R_f$ : 0.21 (50% EtOAC/Hex)

$^1\text{H}$  NMR (500 MHz,  $\text{CDCl}_3$ )  $\delta$  7.87 (dd,  $J = 5.4, 3.1$  Hz, 2H), 7.74 (dd,  $J = 5.5, 3.0$  Hz, 2H), 5.61 (d,  $J = 9.7$  Hz, 1H), 4.58 (ddd,  $J = 10.2, 4.2, 1.8$  Hz, 1H), 4.43 (dddd,  $J = 10.1,$

8.2, 5.9, 1.8 Hz, 1H), 4.02 (dd,  $J = 14.5, 10.2$  Hz, 1H), 3.91 (dd,  $J = 14.5, 4.2$  Hz, 1H), 2.10 (s, 3H), 1.67 – 1.53 (m, 2H), 1.44 – 1.33 (m, 2H), 0.94 (t,  $J = 7.3$  Hz, 3H).

$^{13}\text{C}$  NMR (126 MHz,  $\text{CDCl}_3$ )  $\delta$  170.1, 168.0, 134.2, 131.8, 123.5, 63.0, 49.7, 42.5, 35.8, 23.4, 19.0, 13.8.

**Resolution of enantiomers:** DAICEL Chiralpak®, AD-H 10% IPA/Hexane 1 ml/min, 230 nm, RT 1 (minor)=13.0 min, RT 2 (major) = 15.8 min.

**HRMS analysis (ESI):** calculated for  $[\text{M}+\text{H}]^+$ :  $\text{C}_{16}\text{H}_{20}\text{ClN}_2\text{O}_3$ : 323.1162; Found: 323.1162

**Optical activity:**  $[\alpha]_{\text{D}}^{20} = +2.1$  ( $c = 0.10$ ,  $\text{CHCl}_3$ , 29% *ee*)

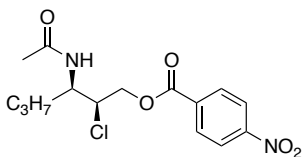

**2k**, (2*S*,3*R*)-3-acetamido-2-chlorohexyl 4-nitrobenzoate

Compound **2k** (23.3 mg, 68% yield, 60% *ee*) was synthesized following the procedure detailed in Section **IIb** using **1k** (24.9 mg, 0.10 mmol) as starting material.

$^1\text{H}$  NMR (500 MHz,  $\text{CDCl}_3$ )  $\delta$  8.31 (d,  $J = 8.9$  Hz, 2H), 8.25 (d,  $J = 9.0$  Hz, 2H), 5.50 (d,  $J = 9.7$  Hz, 1H), 4.57 – 4.43 (m, 3H), 4.35 (ddd,  $J = 7.6, 6.5, 1.8$  Hz, 1H), 2.05 (s, 3H), 1.71 – 1.52 (m, 2H), 1.44 – 1.35 (m, 2H), 0.95 (t,  $J = 7.3$  Hz, 3H).

$^{13}\text{C}$  NMR (126 MHz,  $\text{CDCl}_3$ )  $\delta$  169.9, 164.1, 150.7, 135.0, 131.0, 123.7, 66.1, 62.0, 48.7, 35.3, 23.3, 19.1, 13.8.

**Resolution of enantiomers:** DAICEL Chiralcel®, OD-H 15% IPA/Hexane 1 ml/min, 254 nm, RT 1 (major)=11.6 min, RT 2 (minor) =15.9 min.

**HRMS analysis (ESI):** calculated for  $[\text{M}+\text{H}]^+$ :  $\text{C}_{15}\text{H}_{20}\text{ClN}_2\text{O}_5$ : 343.1061; Found: 343.1058

**Optical activity:**  $[\alpha]_{\text{D}}^{20} = +3.0$  ( $c = 0.1$ ,  $\text{CHCl}_3$ , 60% *ee*)

$R_f$ : 0.23 (50% EtOAc/Hex)

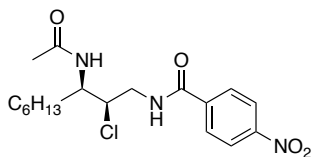

**2m**, *N*-((2*R*,3*R*)-3-acetamido-2-chlorononyl)-4-nitrobenzamide

R<sub>f</sub>: 0.22 (50% EtOAC/Hex).

Compound **2m** (30.3 mg, 79% yield, 99% *ee*) was synthesized following the procedure detailed in Section **IIa** using **1m** (29.0 mg, 0.10 mmol) as starting material.

**<sup>1</sup>H NMR (500 MHz, CDCl<sub>3</sub>)** δ 8.33 – 8.23 (m, 3H), 8.08 (d, *J* = 8.8 Hz, 2H), 5.58 (d, *J* = 9.4 Hz, 1H), 4.34 (ddd, *J* = 13.8, 8.8, 5.2 Hz, 1H), 4.26 (tdd, *J* = 8.7, 5.7, 1.7 Hz, 1H), 4.13 (ddd, *J* = 11.1, 5.2, 1.7 Hz, 1H), 2.92 (ddd, *J* = 13.7, 11.0, 4.3 Hz, 1H), 2.15 (s, 3H), 1.71 – 1.54 (m, 2H), 1.36 – 1.16 (m, 8H), 0.84 (t, *J* = 7.4 Hz, 3H).

**<sup>13</sup>C NMR (126 MHz, CDCl<sub>3</sub>)** δ 172.0, 164.8, 149.7, 139.2, 128.4, 123.9, 61.1, 49.7, 42.5, 32.8, 31.5, 28.9, 26.0, 23.3, 22.5, 14.0.

**Resolution of enantiomers:** DAICEL Chiralpak®, AD-H 4% IPA/Hexane 1 ml/min, 254 nm, RT 1 (major)=28.1 min, RT 2 (major) =31.0 min.

**HRMS analysis (ESI):** calculated for [M+H]<sup>+</sup>: C<sub>18</sub>H<sub>27</sub>ClN<sub>3</sub>O<sub>4</sub>: 384.1690; Found: 384.1688

**Optical activity:** [α]<sub>D</sub><sup>20</sup> = -35.3 (c = 0.20, CHCl<sub>3</sub>, 99% *ee*)

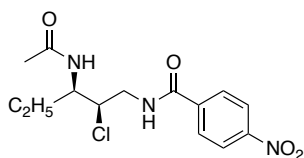

**2n**, *N*-((2*R*,3*R*)-3-acetamido-2-chloropentyl)-4-nitrobenzamide

Compound **2n** (23.3 mg, 73% yield, 99% *ee*) was synthesized following the procedure detailed in Section **IIa** using **1n** (23.4 mg, 0.10 mmol) as starting material.

R<sub>f</sub>: 0.16 (50% EtOAC/Hex)

**<sup>1</sup>H NMR (500 MHz, CDCl<sub>3</sub>)** δ 8.35 – 8.27 (m, 3H), 8.10 (d, *J* = 9.0 Hz, 2H), 5.62 (d, *J* = 9.3 Hz, 1H), 4.35 (ddd, *J* = 13.8, 8.8, 5.1 Hz, 1H), 4.23 – 4.09 (m, 2H), 2.94 (ddd, *J* = 13.6, 11.0, 4.3 Hz, 1H), 2.17 (s, 3H), 1.78 – 1.58 (m, 2H), 0.96 (t, *J* = 7.4 Hz, 3H).



$^{13}\text{C}$  NMR (126 MHz,  $\text{CDCl}_3$ )  $\delta$  172.2, 164.8, 149.7, 139.2, 128.4, 123.9, 60.8, 51.3, 42.5, 25.9, 23.3, 10.6.

**Resolution of enantiomers:** DAICEL Chiralpak®, AD-H 15% IPA/Hexane 1 ml/min, 214 nm, RT 1 (major)=7.8 min, RT 2 (minor) =9.4 min.

**HRMS analysis (ESI):** calculated for  $[\text{M}+\text{H}]^+$ :  $\text{C}_{14}\text{H}_{19}\text{ClN}_3\text{O}_4$ : 328.1064; Found: 328.1061

**Optical activity:**  $[\alpha]_{\text{D}}^{20} = -40.5$  ( $c = 0.2$ ,  $\text{CHCl}_3$ , 99% *ee*)

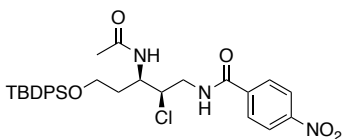

**2o**, *N*-((2*R*,3*R*)-3-acetamido-5-((*tert*-butyldiphenylsilyl)oxy)-2-chloropentyl)-4-nitrobenzamide

Compound **2o** (36.1 mg, 62% yield, 99% *ee*) was synthesized following the procedure detailed in Section **IIa** using **1o** (48.8 mg, 0.10 mmol) as starting material.

R<sub>f</sub>: 0.36 (50% EtOAc/Hex)

$^1\text{H}$  NMR (500 MHz,  $\text{CDCl}_3$ )  $\delta$  8.49 (dd,  $J = 8.9, 4.2$  Hz, 1H), 8.25 (d,  $J = 8.9$  Hz, 2H), 8.09 (d,  $J = 8.8$  Hz, 2H), 7.51-7.55 (m,  $J = 9.7, 6.7, 1.5$  Hz, 4H), 7.45 – 7.39 (m, 2H), 7.39-7.34 (m, 4H), 5.61 (d,  $J = 9.3$  Hz, 1H), 4.77 (dtd,  $J = 8.9, 6.9, 1.7$  Hz, 1H), 4.40 (ddd,  $J = 13.9, 8.9, 5.1$  Hz, 1H), 4.17 (ddd,  $J = 11.2, 5.1, 1.7$  Hz, 1H), 3.76 – 3.58 (m, 2H), 2.93 (ddd,  $J = 13.7, 11.2, 4.2$  Hz, 1H), 2.11 (s, 3H), 1.84 (q,  $J = 6.4$  Hz, 2H), 0.89 (s, 9H).

$^{13}\text{C}$  NMR (126 MHz,  $\text{CDCl}_3$ )  $\delta$  172.2, 164.7, 149.7, 139.1, 135.5, 135.4, 133.0, 133.0, 129.8, 129.8, 128.4, 127.8, 127.8, 123.8, 61.5, 59.5, 46.4, 42.4, 35.6, 26.7, 23.3, 19.0.

**Resolution of enantiomers:** DAICEL Chiralcel®, OD-H 7% IPA/Hexane 1ml/min, 254nm, RT 1 (minor)=21.5 min, RT 2 (major) =26.4 min.

**HRMS analysis (ESI):** calculated for  $[\text{M}+\text{H}]^+$ :  $\text{C}_{30}\text{H}_{37}\text{ClN}_3\text{O}_5\text{Si}$ : 582.2191; Found: 582.2188

**Optical activity:**  $[\alpha]_{\text{D}}^{20} = -173.2$  ( $c = 0.05$ ,  $\text{CHCl}_3$ , 99% *ee*)

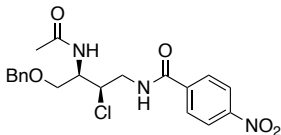

**2p**, *N*-((2*R*,3*R*)-3-acetamido-4-(benzyloxy)-2-chlorobutyl)-4-nitrobenzamide

The substrate **1p** (32.6 mg, 0.1 mmol, 1.0 equiv) and (DHQD)<sub>2</sub>PHAL (1.6 mg, 2 mol%) were suspended in acetonitrile (1 mL) in a test tube with a magnetic stir bar and capped with a rubber septa. HFIP (105  $\mu$ L, 1.0 mmol, 10 equiv) was added via a syringe. The resulting suspension was stirred at 23 °C. After stirring for 10 min DCDMH (39.4 mg, 0.2 mmol, 2 equiv) was added. The reaction was monitored by TLC and (DHQD)<sub>2</sub>PHAL (1.6 mg, 2 mol%) was added every 12 h until the reaction reached completion. Upon completion, the reaction was quenched by the addition of saturated Na<sub>2</sub>S<sub>2</sub>O<sub>3</sub> (2 mL). The reaction was concentrated to remove the acetonitrile and the resultant aqueous layer was extracted with DCM (3 x 4 mL). The combined organics were concentrated. To the concentrated product in the vial with a stir bar, acetonitrile (1 mL) and a solution of HCl (1 M, 0.2 mL) were added and stirred for 15 min. Water (3 mL) was added and the solution was concentrated and extracted with DCM (3 x 4 mL). The combined organic layers were dried with anhydrous Na<sub>2</sub>SO<sub>4</sub> and concentrated. Column chromatography (SiO<sub>2</sub>/EtOAc–Hexanes gradient) provided the desired product **2p** in a 23 % yield (9.7 mg, 99% *ee*)

R<sub>f</sub>: 0.10 (50% EtOAc/Hex)

**<sup>1</sup>H NMR (500 MHz, CDCl<sub>3</sub>)**  $\delta$  8.31 (d, *J* = 8.8 Hz, 2H), 8.19 – 8.12 (m, 1H), 8.08 (d, *J* = 8.9 Hz, 2H), 7.38 – 7.27 (m, 5H), 5.73 (d, *J* = 9.2 Hz, 1H), 4.62 – 4.44 (m, 3H), 4.38 – 4.25 (m, 2H), 3.59 (d, *J* = 6.8 Hz, 2H), 3.00 (ddd, *J* = 15.2, 12.1, 4.5 Hz, 1H), 2.14 (s, 3H).

**<sup>13</sup>C NMR (126 MHz, CDCl<sub>3</sub>)**  $\delta$  172.3, 164.8, 149.7, 139.2, 137.2, 128.6, 128.4, 128.1, 127.9, 123.8, 73.5, 69.3, 58.5, 49.4, 42.2, 23.3.

**Resolution of enantiomers:** DAICEL Chiralcel®, OD-H 10% IPA/Hexane 1 ml/min, 254 nm, RT 1 (major)=42.7 min, RT 2 (minor) =66.8 min.

**HRMS analysis (ESI):** calculated for [M+H]<sup>+</sup>: C<sub>20</sub>H<sub>23</sub>ClN<sub>3</sub>O<sub>5</sub>: 420.1326; Found: 420.1328

**Optical activity:** [ $\alpha$ ]<sub>D</sub><sup>20</sup> = -21.5 (c = 0.1, CHCl<sub>3</sub>, 99% *ee*)

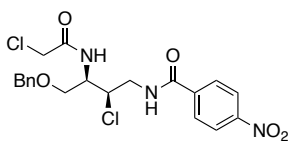

**2p'**, *N*-((2*R*,3*R*)-4-(benzyloxy)-2-chloro-3-(2-chloroacetamido)butyl)-4-nitrobenzamide  
 The substrate **1p** (32.6 mg, 0.1 mmol, 1.0 equiv) and (DHQD)<sub>2</sub>PHAL (1.6 mg, 2 mol%) were suspended in acetonitrile (1 mL) in a test tube with a magnetic stir bar and capped with a rubber septa. HFIP (105  $\mu$ L, 1.0 mmol, 10 equiv) was added via a syringe. The resulting suspension was stirred at 23 °C. After stirring for 10 min DCDMH (39.4 mg, 0.2 mmol, 2 equiv) was added. The reaction was monitored by TLC and (DHQD)<sub>2</sub>PHAL (1.6 mg 2 mol%) was added every 12 h until the reaction reached completion. Upon completion, the reaction was quenched by the addition of saturated Na<sub>2</sub>S<sub>2</sub>O<sub>3</sub> (2 mL). The reaction was concentrated to remove the acetonitrile and the resultant aqueous layer was extracted with DCM (3 x 4 mL). The combined organics were concentrated. To the concentrated product in the vial with a stir bar, acetonitrile (1 mL) and a solution of HCl (1 M, 0.2 mL) were added and stirred for 15 min. Water (3 mL) was added and the solution was concentrated and extracted with DCM (3 x 4 mL). The combined organic layers were dried with anhydrous Na<sub>2</sub>SO<sub>4</sub> and concentrated. Column chromatography (SiO<sub>2</sub>/EtOAc–Hexanes gradient) provided product **2p'** in a 20.8 mg yield (46% yield, 99% *ee*).

R<sub>f</sub>: 0.35 (50% EtOAc/Hex)

**<sup>1</sup>H NMR (500 MHz, CDCl<sub>3</sub>)**  $\delta$  8.31 (d, *J* = 8.9 Hz, 2H), 8.04 (d, *J* = 8.8 Hz, 2H), 7.77 (dd, *J* = 8.1, 4.6 Hz, 1H), 7.38 – 7.29 (m, 5H), 6.78 (d, *J* = 9.3 Hz, 1H), 4.61 – 4.51 (m, 3H), 4.40 (ddd, *J* = 10.2, 5.6, 2.0 Hz, 1H), 4.26 (ddd, *J* = 13.9, 8.2, 5.7 Hz, 1H), 4.17 (d, *J* = 1.9 Hz, 2H), 3.65 (d, *J* = 6.7 Hz, 2H), 3.09 (ddd, *J* = 13.9, 10.2, 4.8 Hz, 1H).

**<sup>13</sup>C NMR (126 MHz, CDCl<sub>3</sub>)**  $\delta$  168.0, 164.9, 149.8, 139.1, 137.1, 128.6, 128.4, 128.1, 127.8, 123.9, 73.6, 69.0, 58.2, 50.0, 42.4, 42.4.

**Resolution of enantiomers:** DAICEL Chiralpak®, IA 20% IPA/Hexane 1ml/min, 254 nm, RT 1 (major)=11.8 min, RT 2 (minor) =15.9 min.

**HRMS analysis (ESI):** calculated for  $[M+H]^+$ :  $C_{20}H_{22}Cl_2N_3O_5$ : 454.0937; Found: 454.0938

**Optical activity:**  $[\alpha]_D^{20} = +15.1$  ( $c = 0.1$ ,  $CHCl_3$ , 99% *ee*)

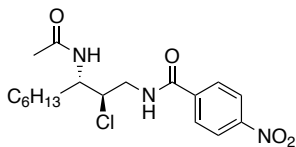

**2q**, *N*-((2*R*,3*S*)-3-acetamido-2-chlorononyl)-4-nitrobenzamide

$R_f$ : 0.28 (70% EtOAC/Hex)

Compound **2q** (31.7 mg, 83% yield, 94% *ee*) was synthesized following the procedure detailed in Section **IIa** using **1q** (29.0 mg, 0.10 mmol) as starting material.

**$^1H$  NMR (500 MHz,  $C_2D_6SO$ )**  $\delta$  9.04 (t,  $J = 5.7$  Hz, 1H), 8.33 (d,  $J = 8.9$  Hz, 2H), 8.05 (d,  $J = 8.8$  Hz, 2H), 7.99 (d,  $J = 8.4$  Hz, 1H), 4.22 (dt,  $J = 8.3, 4.9$  Hz, 1H), 4.10 – 3.89 (m, 1H), 3.69 (dt,  $J = 14.1, 5.2$  Hz, 1H), 3.48 (ddd,  $J = 14.3, 8.4, 6.1$  Hz, 1H), 1.85 (s, 3H), 1.60-1.68 (m, 1H), 1.53 – 1.40 (m, 1H), 1.37 – 1.15 (m, 8H), 0.84 (t,  $J = 7.4$  Hz, 3H).

**$^{13}C$  NMR (126 MHz,  $C_2D_6SO$ )**  $\delta$  170.0, 165.3, 149.6, 140.2, 129.2, 124.1, 65.2, 51.3, 43.5, 31.6, 29.2, 28.9, 25.9, 22.9, 22.5, 14.4.

**Resolution of enantiomers:** DAICEL Chiralcel®, OD-H 5% IPA/Hexane 1 ml/min, 254 nm, RT 1 (major)=17.1 min, RT 2 (minor) =23.0 min.

**HRMS analysis (ESI):** calculated for  $[M+H]^+$ :  $C_{18}H_{27}ClN_3O_4$ : 384.1690; Found: 384.1689

**Optical activity:**  $[\alpha]_D^{20} = +72.1$  ( $c = 0.20$ ,  $CHCl_3$ , 95% *ee*)

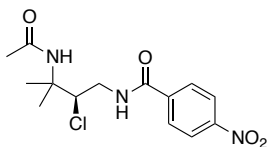

**2r**, (*R*)-*N*-(3-acetamido-2-chloro-3-methylbutyl)-4-nitrobenzamide

Compound **2r** (25.9 mg, 79% yield, 99% *ee*) was synthesized following the procedure detailed in Section **IIa** using **1r** (23.4 mg, 0.10 mmol) as starting material.

$R_f$ : 0.13 (70% EtOAC/Hex)

**<sup>1</sup>H NMR (500 MHz, CDCl<sub>3</sub>)** δ 8.31 (d, *J* = 8.8 Hz, 2H), 7.96 (d, *J* = 8.8 Hz, 2H), 6.79 (s, 1H), 5.54 (s, 1H), 4.90 (dd, *J* = 9.5, 3.2 Hz, 1H), 4.21 – 4.10 (m, 1H), 3.57 – 3.47 (m, 1H), 1.98 (s, 3H), 1.54 (s, 3H), 1.50 (s, 3H)

**<sup>13</sup>C NMR (126 MHz, CDCl<sub>3</sub>)** δ 170.3, 165.5, 149.7, 139.6, 128.2, 123.9, 66.6, 56.6, 42.9, 24.5, 24.4, 24.0.

**Resolution of enantiomers:** DAICEL Chiralpak®, AD-H 10% IPA/Hexane 1 ml/min, 254nm, RT 1 (major)=17.5 min, RT 2 (minor) =22.6 min.

**HRMS analysis (ESI):** calculated for [M+H]<sup>+</sup>: C<sub>14</sub>H<sub>19</sub>ClN<sub>3</sub>O<sub>4</sub>: 328.1064; Found: 328.1064

**Optical activity:** [α]<sub>D</sub><sup>20</sup> = +62.4 (c = 0.10, CHCl<sub>3</sub>, 99 % *ee*)

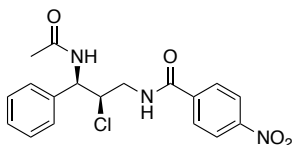

**2s**, *N*-((2*R*,3*R*)-3-acetamido-2-chloro-3-phenylpropyl)-4-nitrobenzamide

Compound **2s** (35.6 mg, 95% yield, 65:35 *dr*, 99% *ee*) was synthesized following the procedure detailed in Section **IIa** using **1s** (28.2 mg, 0.10 mmol) as starting material.

R<sub>f</sub>: 0.11 (50% EtOAc/Hex)

**<sup>1</sup>H NMR (500 MHz, CDCl<sub>3</sub>)** δ 8.32 (d, *J* = 8.7 Hz, 2H), 8.11 (m, 3H), 7.42 – 7.36 (m, 2H), 7.36 – 7.29 (m, 3H), 6.29 (d, *J* = 9.7 Hz, 1H), 5.63 (dd, *J* = 9.6, 1.8 Hz, 1H), 4.56 (ddd, *J* = 10.5, 5.4, 1.8 Hz, 1H), 4.39 (ddd, *J* = 13.8, 8.3, 5.4 Hz, 1H), 3.14 (ddd, *J* = 13.8, 10.5, 4.7 Hz, 1H), 2.25 (s, 3H).

**<sup>13</sup>C NMR (126 MHz, CDCl<sub>3</sub>)** δ 171.8, 165.0, 149.8, 139.1, 137.1, 128.8, 128.4, 128.3, 126.6, 123.9, 61.2, 52.2, 43.0, 23.4.

**Resolution of enantiomers:** DAICEL Chiralcel®, OD-H 20% IPA/Hexane 1 ml/min, 254 nm, RT 1 (major)=12.1 min, RT 2 (minor) = 16.9 min.

**HRMS analysis (ESI):** calculated for [M+H]<sup>+</sup>: C<sub>18</sub>H<sub>19</sub>ClN<sub>3</sub>O<sub>4</sub>: 376.1064; Found: 376.1057.

**Optical activity:** [α]<sub>D</sub><sup>20</sup> = -33.5 (c = 0.2, CHCl<sub>3</sub>, 99% *ee*)

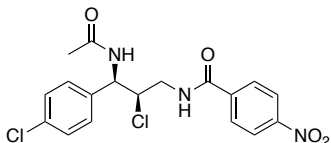

**2t**, *N*-((2*R*,3*R*)-3-acetamido-2-chloro-3-(4-chlorophenyl)propyl)-4-nitrobenzamide

Compound **2t** (37.6 mg, 92% yield, 64:36 *dr*, 97% *ee*) was synthesized following the procedure detailed in Section **IIa** using **1t** (31.6 mg, 0.10 mmol) as starting material.

R<sub>f</sub>: 0.08 (50% EtOAC/Hex)

**<sup>1</sup>H NMR (500 MHz, CDCl<sub>3</sub>)** δ 8.32 (d, *J* = 8.8 Hz, 2H), 8.09 (d, *J* = 8.8 Hz, 2H), 8.01 (dd, *J* = 8.0, 4.7 Hz, 1H), 7.39 – 7.32 (m, 2H), 7.29 – 7.23 (m, 2H), 6.29 (d, *J* = 9.7 Hz, 1H), 5.61 (dd, *J* = 9.8, 1.9 Hz, 1H), 4.52 (ddd, *J* = 10.3, 5.5, 1.9 Hz, 1H), 4.35 (ddd, *J* = 13.8, 8.1, 5.4 Hz, 1H), 3.14 (ddd, *J* = 13.9, 10.3, 4.8 Hz, 1H), 2.25 (s, 3H).

**<sup>13</sup>C NMR (126 MHz, CDCl<sub>3</sub>)** δ 171.7, 165.1, 149.8, 138.9, 135.6, 134.2, 129.0, 128.4, 128.1, 123.9, 61.0, 51.7, 43.0, 23.4.

**Resolution of enantiomers:** DAICEL Chiralpak®, IA 20% IPA/Hexane 1 ml/min, 254 nm, RT 1 (minor)=10.8 min, RT 2 (major)=17.6 min.

**HRMS analysis (ESI):** calculated for [M+H]<sup>+</sup>: C<sub>18</sub>H<sub>18</sub>Cl<sub>2</sub>N<sub>3</sub>O<sub>4</sub>: 410.0674; Found: 410.0668.

**Optical activity:** [α]<sub>D</sub><sup>20</sup> = -28.2 (c = 0.2, CHCl<sub>3</sub>, 97% *ee*)

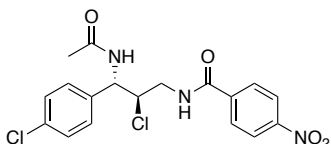

**2t-Diastereomer**, *N*-((2*R*,3*S*)-3-acetamido-2-chloro-3-(4-chlorophenyl)propyl)-4-nitrobenzamide

R<sub>f</sub>: 0.15 (70% EtOAC/Hex)

**<sup>1</sup>H NMR (500 MHz, CDCl<sub>3</sub>)** δ 8.31 (d, *J* = 8.7 Hz, 2H), 8.01 (d, *J* = 8.7 Hz, 2H), 7.55 (dd, *J* = 8.3, 3.9 Hz, 1H), 7.36 (d, *J* = 8.6 Hz, 2H), 7.30 (d, *J* = 8.5 Hz, 2H), 6.26 (d, *J* = 8.7 Hz, 1H), 5.23 (t, *J* = 8.5 Hz, 1H), 4.46 – 4.37 (m, 2H), 3.34 (ddd, *J* = 15.4, 5.9, 3.8 Hz, 1H), 2.07 (s, 3H).

**<sup>13</sup>C NMR (126 MHz, CDCl<sub>3</sub>)** δ 170.6, 165.6, 149.7, 139.4, 136.1, 134.7, 129.3, 128.9, 128.3, 123.9, 62.0, 55.6, 42.7, 23.4.

**Resolution of enantiomers:** DAICEL Chiralcel®, OJ-H 8% IPA/Hexane 1 ml/min, 254 nm, RT 1 (major)=22.2 min, RT 2 (minor) =31.9 min.

**HRMS analysis (ESI):** calculated for  $[M+H]^+$ : C<sub>18</sub>H<sub>18</sub>Cl<sub>2</sub>N<sub>3</sub>O<sub>4</sub>: 410.0674; Found: 410.0666.

**Optical activity:**  $[\alpha]_D^{20} = +90.8$  (c = 0.2, CHCl<sub>3</sub>, 98% *ee*)

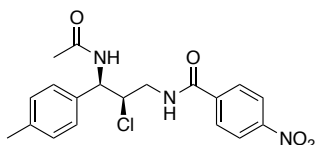

**2u**, *N*-((2*R*,3*R*)-3-acetamido-2-chloro-3-(*p*-tolyl)propyl)-4-nitrobenzamide

Compound **2u** (30.3 mg, 78% yield, 50:50 *dr*, 99% *ee*) was synthesized following the procedure detailed in Section **IIa** using **1u** (29.6 mg, 0.10 mmol) as starting material.

R<sub>f</sub>: 0.08 (50% EtOAC/Hex)

**<sup>1</sup>H NMR (500 MHz, CDCl<sub>3</sub>)** δ 8.31 (d, *J* = 8.8 Hz, 2H), 8.13 (dd, *J* = 8.3, 4.8 Hz, 1H), 8.09 (d, *J* = 8.8 Hz, 2H), 7.19 (s, 4H), 6.27 (d, *J* = 9.7 Hz, 1H), 5.57 (d, *J* = 9.7 Hz, 1H), 4.52 (ddd, *J* = 10.5, 5.4, 1.9 Hz, 1H), 4.37 (ddd, *J* = 13.8, 8.3, 5.4 Hz, 1H), 3.11 (ddd, *J* = 13.8, 10.5, 4.7 Hz, 1H), 2.34 (s, 3H), 2.23 (s, 3H).

**<sup>13</sup>C NMR (126 MHz, CDCl<sub>3</sub>)** δ 171.7, 165.0, 149.8, 139.1, 138.1, 134.0, 129.5, 128.4, 126.5, 123.9, 61.3, 52.0, 43.0, 23.4, 21.0.

**Resolution of enantiomers:** DAICEL Chiralpak®, IA 15% IPA/Hexane 1 ml/min, 254nm, RT 1 (minor)=17.6 min, RT 2 (major) = 23.6 min.

**HRMS analysis (ESI):** calculated for  $[M+H]^+$ : C<sub>19</sub>H<sub>21</sub>ClN<sub>3</sub>O<sub>4</sub>: 390.1221; Found: 390.1214.

**Optical activity:**  $[\alpha]_D^{20} = +157.3$  (c = 0.1, CHCl<sub>3</sub>, 99% *ee*)

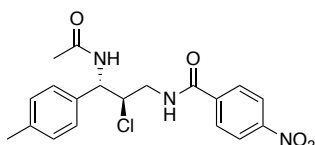

**2u-Diastereomer**, *N*-((2*R*,3*R*)-3-acetamido-2-chloro-3-(*p*-tolyl)propyl)-4-nitrobenzamide

R<sub>f</sub>: 0.22 (70% EtOAC/Hex)

**<sup>1</sup>H NMR (500 MHz, CDCl<sub>3</sub>)** δ 8.32 (d, *J* = 8.8 Hz, 2H), 8.05 (d, *J* = 8.8 Hz, 2H), 7.65 (d, *J* = 8.1 Hz, 1H), 7.27 – 7.17 (m, 4H), 6.00 (d, *J* = 8.4 Hz, 1H), 5.19 (t, *J* = 8.7 Hz, 1H), 4.50 (ddd, *J* = 14.5, 8.9, 3.5 Hz, 1H), 4.43 (ddd, *J* = 8.5, 4.7, 3.5 Hz, 1H), 3.37 (ddd, *J* = 14.6, 4.7, 3.7 Hz, 1H), 2.37 (s, 3H), 2.07 (s, 3H).

**<sup>13</sup>C NMR (126 MHz, CDCl<sub>3</sub>)** δ 170.7, 165.5, 149.7, 139.6, 138.8, 134.6, 129.8, 128.4, 127.3, 123.8, 62.2, 56.1, 42.5, 23.4, 21.2.

**Resolution of enantiomers:** DAICEL Chiralcel®, OJ-H 5% IPA/Hexane 1 ml/min, 254 nm, RT 1 (major)=39.7 min, RT 2 (minor) =49.4 min.

**HRMS analysis (ESI):** calculated for [M+H]<sup>+</sup>: C<sub>19</sub>H<sub>21</sub>ClN<sub>3</sub>O<sub>4</sub>: 390.1221; Found: 390.1212.

**Optical activity:** +80.1 (90% *ee*) (*c* = 0.1, CHCl<sub>3</sub>, 99% *ee*)

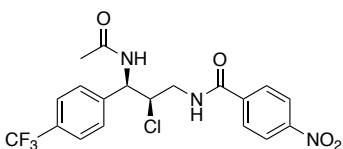

**2v**, *N*-((2*R*,3*R*)-3-acetamido-2-chloro-3-(4-(trifluoromethyl)phenyl)propyl)-4-nitrobenzamide

The substrate **1v** (0.1 mmol, 1.0 equiv) and (DHQD)<sub>2</sub>PHAL (1.6 mg, 2 mol%) were suspended in acetonitrile (1 mL) in a test tube with a magnetic stir bar and capped with a rubber septa. HFIP (105 μL, 1.0 mmol, 10 equiv) was added via a syringe. The resulting suspension was stirred at 23 °C. After stirring for 10 min DCDMH (39.4 mg, 0.2 mmol, 2 equiv) was added. The reaction was monitored by TLC and (DHQD)<sub>2</sub>PHAL (1.6 mg 2 mol%) was added every 12 h until the reaction reached completion. Upon completion, the reaction was quenched by the addition of saturated Na<sub>2</sub>S<sub>2</sub>O<sub>3</sub> (2 mL). The reaction was concentrated to remove the acetonitrile and the resultant aqueous layer was extracted with DCM (3 x 4 mL). The combined organics were concentrated. To the concentrated product in the vial with a stir bar, acetonitrile (1 mL) and a solution of HCl (1 M, 0.2 mL) were added and stirred for 15 min. Water (3 mL) was added and the solution was concentrated and extracted with DCM (3 x 4 mL). The combined organic layers were dried with anhydrous Na<sub>2</sub>SO<sub>4</sub> and concentrated. Column chromatography (SiO<sub>2</sub>/EtOAc–Hexanes gradient) provided the desired product **2v** (5.1 mg, 12% yield, 89% *ee*).



R<sub>f</sub>: 0.28 (50% EtOAc/Hex)

**<sup>1</sup>H NMR (500 MHz, CDCl<sub>3</sub>)** δ 8.34 (d, *J* = 8.9 Hz, 2H), 8.11 (d, *J* = 8.8 Hz, 2H), 7.95 (t, *J* = 6.8 Hz, 1H), 7.66 (d, *J* = 8.2 Hz, 2H), 7.46 (d, *J* = 8.1 Hz, 2H), 6.27 (d, *J* = 9.9 Hz, 1H), 5.71 (d, *J* = 9.8 Hz, 1H), 4.58 (ddd, *J* = 10.3, 5.5, 1.8 Hz, 1H), 4.39 (ddd, *J* = 13.8, 8.2, 5.5 Hz, 1H), 3.17 (ddd, *J* = 13.7, 10.3, 4.8 Hz, 1H), 2.28 (s, 3H).

**<sup>13</sup>C NMR (126 MHz, CDCl<sub>3</sub>)** δ 171.7, 165.1, 149.9, 140.6, 138.5, 130.8 (q, *J*<sub>CF</sub> = 31.25 Hz), 128.4, 127.1, 125.7 (q, *J*<sub>CF</sub> = 3.75 Hz), 123.8 (q, *J*<sub>CF</sub> = 145.00 Hz), 124.0, 60.9, 51.9, 43.1, 23.5.

**<sup>19</sup>F NMR (470 MHz, CDCl<sub>3</sub>)** δ -62.72.

**Resolution of enantiomers:** DAICEL Chiralcel®, IA 20% IPA/Hexane 1 ml/min, 254nm, RT 1 (minor)=8.4 min, RT 2 (major) =15.1 min.

**HRMS analysis (ESI):** calculated for [M+H]<sup>+</sup>: C<sub>19</sub>H<sub>18</sub>ClF<sub>3</sub>N<sub>3</sub>O<sub>4</sub>: 444.0938; Found: 444.0932.

**Optical activity:** [α]<sub>D</sub><sup>20</sup> = -18.2 (c = 0.1, CHCl<sub>3</sub>, 89% *ee*)

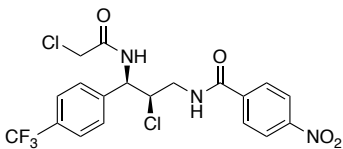

**2v'**, *N*-((2*R*,3*R*)-2-chloro-3-(2-chloroacetamido)-3-(4-(trifluoromethyl)phenyl)propyl)-4-nitrobenzamide

The substrate **1v** (0.1 mmol, 1.0 equiv) and (DHQD)<sub>2</sub>PHAL (1.6 mg, 2 mol%) were suspended in acetonitrile (1 mL) in a test tube with a magnetic stir bar and capped with a rubber septa. HFIP (105 μL, 1.0 mmol, 10 equiv) was added via a syringe. The resulting suspension was stirred at 23 °C. After stirring for 10 min DCDMH (39.4 mg, 0.2 mmol, 2 equiv) was added. The reaction was monitored by TLC and (DHQD)<sub>2</sub>PHAL (1.6 mg 2 mol%) was added every 12 h until the reaction reached completion. Upon completion, the reaction was quenched by the addition of saturated Na<sub>2</sub>S<sub>2</sub>O<sub>3</sub> (2 mL). The reaction was concentrated to remove the acetonitrile and the resultant aqueous layer was extracted with DCM (3 x 4 mL). The combined organics were concentrated. To the concentrated product in the vial with a stir bar, acetonitrile (1 mL) and a solution of HCl (1 M, 0.2 mL) were added and stirred for 15 min. Water (3 mL) was added and the solution was

concentrated and extracted with DCM (3 x 4 mL). The combined organic layers were dried with anhydrous Na<sub>2</sub>SO<sub>4</sub> and concentrated. Column chromatography (SiO<sub>2</sub>/EtOAc–Hexanes gradient) provided the desired product **2v'** (30.5 mg, 64% yield, 87% *ee*).

R<sub>f</sub>: 0.54 (50% EtOAc/Hex)

**<sup>1</sup>H NMR (500 MHz, CDCl<sub>3</sub>)** δ 8.32 (d, *J* = 8.7 Hz, 2H), 8.06 (d, *J* = 8.7 Hz, 2H), 7.67 (d, *J* = 8.2 Hz, 2H), 7.65 – 7.58 (m, 1H), 7.46 (d, *J* = 8.4 Hz, 3H), 5.67 (d, *J* = 9.7 Hz, 1H), 4.62 (ddd, *J* = 8.8, 6.1, 2.1 Hz, 1H), 4.27 (d, *J* = 5.0 Hz, 2H), 4.26 – 4.19 (m, 1H), 3.34 (ddd, *J* = 14.3, 9.3, 5.3 Hz, 1H).

**<sup>13</sup>C NMR (126 MHz, CDCl<sub>3</sub>)** δ 167.4, 165.2, 149.9, 140.6, 138.8, 130.8 (q, *J*<sub>CF</sub> = 31.25 Hz), 128.4, 127.0, 126.0 (q, *J*<sub>CF</sub> = 3.75 Hz), 124.3 (q, *J*<sub>CF</sub> = 145.00 Hz), 124.0, 61.2, 52.7, 43.4, 42.6.

**<sup>19</sup>F NMR (470 MHz, CDCl<sub>3</sub>)** δ -62.8.

**Resolution of enantiomers:** DAICEL Chiralcel®, OD-H 15% IPA/Hexane 1 ml/min, 254 nm, RT 1 (major)=22.2 min, RT 2 (minor) =29.9 min.

**HRMS analysis (ESI):** calculated for [M+H]<sup>+</sup>: C<sub>19</sub>H<sub>17</sub>Cl<sub>2</sub>F<sub>3</sub>N<sub>3</sub>O<sub>4</sub>: 478.0548; Found: 478.0558.

**Optical activity:** [α]<sub>D</sub><sup>20</sup> = -14.3 (c = 0.1, CHCl<sub>3</sub>, 87% *ee*)

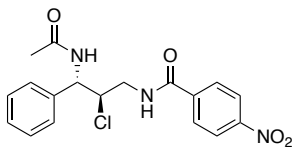

**2w**, *N*-((2*R*,3*S*)-3-acetamido-2-chloro-3-phenylpropyl)-4-nitrobenzamide

Compound **2w** (19.8 mg, 53% yield, 74:26 *dr*, 99% *ee*) was synthesized following the procedure detailed in Section **IIa** using **1w** (28.2 mg, 0.10 mmol) as starting material.

R<sub>f</sub>: 0.19 (70% EtOAc/Hex)

**<sup>1</sup>H NMR (500 MHz, CDCl<sub>3</sub>)** δ 8.31 (d, *J* = 8.8 Hz, 2H), 8.04 (d, *J* = 8.8 Hz, 2H), 7.68 (dd, *J* = 8.7, 3.7 Hz, 1H), 7.44 – 7.31 (m, 5H), 6.16 (d, *J* = 8.5 Hz, 1H), 5.23 (t, *J* = 8.6 Hz, 1H), 4.54 – 4.39 (m, 2H), 3.47 – 3.30 (m, 1H), 2.08 (s, 3H).

**<sup>13</sup>C NMR (126 MHz, CDCl<sub>3</sub>)** δ 170.7, 165.5, 149.7, 139.6, 137.6, 129.2, 128.9, 128.4, 127.5, 123.8, 62.1, 56.3, 42.5, 23.4.

**Resolution of enantiomers:** DAICEL Chiralcel®, OJ-H 10% IPA/Hexane 1 ml/min, 254 nm, RT 1 (major)=18.7 min, RT 2 (minor) =23.5 min.

**HRMS analysis (ESI):** calculated for  $[M+H]^+$ : C<sub>18</sub>H<sub>19</sub>ClN<sub>3</sub>O<sub>4</sub>: 376.1064; Found: 376.1057.

**Optical activity:**  $[\alpha]_D^{20} = +86.8$  (c = 0.1, CHCl<sub>3</sub>, 99% *ee*)

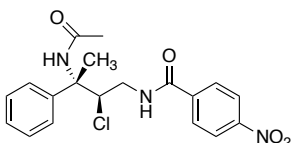

**2x**, *N*-((2*R*,3*S*)-3-acetamido-2-chloro-3-phenylbutyl)-4-nitrobenzamide

R<sub>f</sub>: 0.23 (70% EtOAc/Hex)

Compound **2x** (22.2 mg, 57% yield, 61:39 *dr*, 97% *ee*) was synthesized following the procedure detailed in Section **IIa** using **1x** (29.6 mg, 0.10 mmol) as starting material. Following column chromatography (SiO<sub>2</sub>/EtOAc–Hexanes gradient), though inseparable by column chromatography, the diastereomers were able to be separated by HPLC (IA, 10% IPA/Hexanes).

**<sup>1</sup>H NMR (500 MHz, CDCl<sub>3</sub>)** δ 8.21 (d, *J* = 8.8 Hz, 2H), 7.68 (d, *J* = 8.8 Hz, 2H), 7.43 (d, *J* = 7.3 Hz, 2H), 7.31 (t, *J* = 7.8 Hz, 2H), 7.24 – 7.18 (m, 1H), 6.71 (t, *J* = 5.8 Hz, 1H), 6.13 (s, 1H), 4.90 (dd, *J* = 8.0, 5.2 Hz, 1H), 3.85 (ddd, *J* = 14.5, 6.3, 5.2 Hz, 1H), 3.49 (ddd, *J* = 14.2, 8.0, 6.0 Hz, 1H), 2.14 (s, 3H), 1.93 (s, 3H).

**<sup>13</sup>C NMR (126 MHz, CDCl<sub>3</sub>)** δ 170.1, 165.2, 149.6 (HMBC correlation), 140.5, 139.2, 128.6, 128.1, 127.7, 125.9, 123.7, 67.4, 61.6, 43.5, 29.7, 24.5.

**Resolution of enantiomers:** DAICEL Chiralcel®, IA 10% IPA/Hexane 1 ml/min, 254 nm, RT 1 (major)=15.8 min, RT 2 (minor) =18.0 min.

**HRMS analysis (ESI):** calculated for  $[M+H]^+$ : C<sub>19</sub>H<sub>21</sub>ClN<sub>3</sub>O<sub>4</sub>: 390.1221; Found: 390.1215.

**Optical activity:**  $[\alpha]_D^{20} = -19.2$  (c = 0.1, CHCl<sub>3</sub>, 97% *ee*)

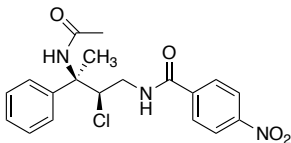

**2x-Diastereomer-**, *N*-((2*R*,3*R*)-3-acetamido-2-chloro-3-phenylbutyl)-4-nitrobenzamide

R<sub>f</sub>: 0.23 (70% EtOAC/Hex)

**<sup>1</sup>H NMR (500 MHz, CDCl<sub>3</sub>)** δ 8.27 (d, *J* = 8.8 Hz, 2H), 7.82 (d, *J* = 8.8 Hz, 2H), 7.50 – 7.45 (m, 2H), 7.39 (dd, *J* = 8.6, 7.0 Hz, 2H), 7.34 – 7.29 (m, 1H), 6.32 (t, *J* = 5.4 Hz, 1H), 6.24 (s, 1H), 4.73 (dd, *J* = 9.2, 3.5 Hz, 1H), 3.92 (ddd, *J* = 14.4, 6.6, 3.5 Hz, 1H), 3.39 (ddd, *J* = 14.5, 9.3, 5.3 Hz, 1H), 2.04 (s, 3H), 1.97 (s, 3H).

**<sup>13</sup>C NMR (126 MHz, CDCl<sub>3</sub>)** δ 169.4, 165.4, 149.8, 141.2, 139.2, 128.8, 128.2, 128.1, 126.0, 123.9, 68.7, 61.4, 42.7, 24.4, 20.3.

**Resolution of enantiomers:** DAICEL Chiralcel®, IA 10% IPA/Hexane 1 ml/min, 254 nm, RT 1 (major)=22.1 min, RT 2 (minor) =28.1 min.

**HRMS analysis (ESI):** calculated for [M+H]<sup>+</sup>: C<sub>19</sub>H<sub>21</sub>ClN<sub>3</sub>O<sub>4</sub>: 390.1221; Found: 390.1187.

**Optical activity:** [α]<sub>D</sub><sup>20</sup> = -35.6 (c = 0.05, CHCl<sub>3</sub>, 97% *ee*)

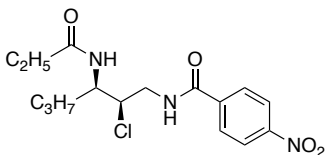

**2aa**, *N*-((2*R*,3*R*)-2-chloro-3-propionamidohexyl)-4-nitrobenzamide

Compound **2aa** (31.2 mg, 88% yield, 99% *ee*) was synthesized following the procedure detailed in Section **IId** using **1a** (24.8 mg, 0.10 mmol) as starting material.

R<sub>f</sub>: 0.29 (50% EtOAC/Hex)

**<sup>1</sup>H NMR (500 MHz, CDCl<sub>3</sub>)** δ 8.36 – 8.25 (m, 3H), 8.09 (d, *J* = 9.0 Hz, 2H), 5.56 (d, *J* = 9.3 Hz, 1H), 4.40 – 4.22 (m, 2H), 4.13 (ddd, *J* = 11.0, 5.2, 1.7 Hz, 1H), 2.89 (ddd, *J* = 13.6, 11.0, 4.3 Hz, 1H), 2.36 (q, *J* = 7.6 Hz, 2H), 1.71 – 1.61 (m, 1H), 1.61 – 1.51 (m, 1H), 1.41 – 1.32 (m, 2H), 1.24 (t, *J* = 7.6 Hz, 3H), 0.90 (t, *J* = 7.4 Hz, 3H).

**<sup>13</sup>C NMR (126 MHz, CDCl<sub>3</sub>)** δ 176.0, 164.8, 149.7, 139.2, 128.4, 123.9, 61.2, 49.0, 42.5, 34.8, 29.9, 19.3, 13.7, 10.2.

**HRMS analysis (ESI):** calculated for  $[M+H]^+$ :  $C_{16}H_{23}ClN_3O_4$ : 356.1377; Found: 356.1378.

**Resolution of enantiomers:** DAICEL Chiralpak®, AS-H 10% IPA/Hexane 1 ml/min, 254 nm, RT 1 (minor)=13.5 min, RT 2 (major) = 28.7 min.

**Optical Activity:**  $[\alpha]_D^{20} = -40.8$  (c = 0.40,  $CHCl_3$ , 99% *ee*)

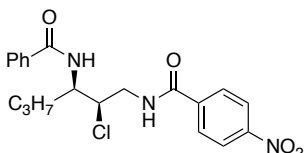

**2ab**, *N*-((2*R*,3*R*)-3-benzamido-2-chlorohexyl)-4-nitrobenzamide

Compound **2ab** (35.0 mg, 86% yield, 98% *ee*) was synthesized following the procedure detailed in Section **IId** using **1a** (24.8 mg, 0.10 mmol) as starting material.

R<sub>f</sub>: 0.65 (50% EtOAc/Hex)

**<sup>1</sup>H NMR (500 MHz,  $CDCl_3$ )**  $\delta$  8.44 – 8.36 (m, 1H), 8.33 (d, *J* = 8.9 Hz, 2H), 8.15 (d, *J* = 8.9 Hz, 2H), 7.86 – 7.81 (m, 2H), 7.62 – 7.57 (m, 1H), 7.55 – 7.48 (m, 2H), 6.23 (d, *J* = 9.4 Hz, 1H), 4.53 (tdd, *J* = 9.2, 5.4, 1.7 Hz, 1H), 4.35 (ddd, *J* = 13.8, 8.7, 5.2 Hz, 1H), 4.24 (ddd, *J* = 10.9, 5.2, 1.7 Hz, 1H), 3.00 (ddd, *J* = 13.7, 10.9, 4.4 Hz, 1H), 1.81 (dtd, *J* = 14.0, 8.5, 6.6 Hz, 1H), 1.74 – 1.63 (m, 1H), 1.49 – 1.39 (m, 2H), 0.93 (t, *J* = 7.3 Hz, 3H).

**<sup>13</sup>C NMR (126 MHz,  $CDCl_3$ )**  $\delta$  169.3, 164.9, 149.7, 139.2, 133.2, 132.4, 129.0, 128.4, 128.0, 123.9, 61.5, 50.0, 42.7, 34.9, 19.4, 13.7.

**Resolution of enantiomers:** DAICEL Chiralcel®, OD-H 15% IPA/Hexane 1 ml/min, 254 nm, RT 1 (minor)=15.4 min, RT 2 (major) =30.0 min.

**HRMS analysis (ESI):** calculated for  $[M+H]^+$ :  $C_{20}H_{23}ClN_3O_4$ : 404.1377; Found: 404.1383.

**Optical activity:**  $[\alpha]_D^{20} = -119.2$  (c = 0.39,  $CHCl_3$ ), 98% *ee*)

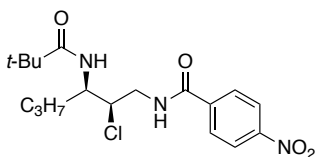

**2ac**, *N*-((2*R*,3*R*)-2-chloro-3-pivalamidohexyl)-4-nitrobenzamide

Compound **2ac** (33.0 mg, 86% yield, 99% *ee*) was synthesized following the procedure detailed in Section **II d** (heated to 80 °C during hydrolysis) using **1a** (24.8 mg, 0.10 mmol) as starting material.

R<sub>f</sub>: 0.65 (30% EtOAc/Hex)

**<sup>1</sup>H NMR (500 MHz, CDCl<sub>3</sub>)** δ 8.39 – 8.27 (m, 3H), 8.11 (d, *J* = 9.0 Hz, 2H), 5.72 (d, *J* = 9.3 Hz, 1H), 4.38 – 4.25 (m, 2H), 4.14 (ddd, *J* = 11.0, 5.1, 1.7 Hz, 1H), 2.81 (ddd, *J* = 13.6, 11.0, 4.3 Hz, 1H), 1.75 – 1.65 (m, 1H), 1.61 – 1.52 (m, 1H), 1.37 (dt, *J* = 15.0, 7.5 Hz, 2H), 1.29 (s, 9H), 0.91 (t, *J* = 7.3 Hz, 3H).

**<sup>13</sup>C NMR (126 MHz, CDCl<sub>3</sub>)** δ 180.7, 164.8, 149.7, 139.3, 128.4, 123.9, 61.5, 48.7, 42.6, 39.2, 34.8, 27.7, 19.3, 13.7.

**Resolution of enantiomers:** DAICEL Chiralpak®, IA 7% IPA/Hexane 1 ml/min, 254 nm, RT 1 (minor)=8.9 min, RT 2 (major) = 10.6 min.

**HRMS analysis (ESI):** calculated for [M+H]<sup>+</sup>: C<sub>18</sub>H<sub>27</sub>N<sub>3</sub>O<sub>4</sub>: 384.1690; Found: 384.1683.

**Optical activity:** [α]<sub>D</sub><sup>20</sup> = -38.9 (c = 0.2, CHCl<sub>3</sub>) (99% *ee*)

**b. Analytical data for vicinal chloroamidine products:**

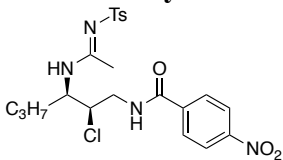

**3a**, *N*-((2*R*,3*R*)-2-chloro-3-*N'*-tosylacetimidamido)hexyl)-4-nitrobenzamide

Compound **3a** (35.1 mg, 71% yield, 99% *ee*) was synthesized following the procedure detailed in Section **III** using **1a** (24.8 mg, 0.10 mmol) as starting material.

R<sub>f</sub>: 0.26 (50% EtOAc/Hex)

**<sup>1</sup>H NMR (500 MHz, CDCl<sub>3</sub>)** δ <sup>1</sup>H NMR (500 MHz, CDCl<sub>3</sub>) δ 8.28 (d, *J* = 8.8 Hz, 2H), 8.21 (d, *J* = 8.8 Hz, 2H), 8.00 (t, *J* = 6.2 Hz, 1H), 7.71 (d, *J* = 8.2 Hz, 2H), 7.25 (d, *J* = 8.2 Hz, 2H), 5.63 (d, *J* = 9.1 Hz, 1H), 4.54 (td, *J* = 9.1, 5.5 Hz, 1H), 4.28 – 4.20 (m, 2H), 3.06 (ddd, *J* = 14.5, 12.2, 5.1 Hz, 1H), 2.41 (s, 3H), 2.41 (s, 3H), 1.69 (dtd, *J* = 15.2, 9.0, 7.1 Hz, 1H), 1.60 – 1.52 (m, 1H), 1.31 (q, *J* = 7.5 Hz, 2H), 0.86 (t, *J* = 7.3 Hz, 3H).

**<sup>13</sup>C NMR (126 MHz, CDCl<sub>3</sub>)** δ 168.0, 165.6, 149.8, 143.3, 139.1, 138.5, 129.7, 128.9, 126.4, 123.7, 60.8, 51.2, 43.3, 34.6, 21.5, 20.9, 19.1, 13.5.

**Resolution of enantiomers:** DAICEL Chiralpak®, IA 15% IPA/Hexane 1 ml/min, 254 nm, RT 1 (major)=13.6 min, RT 2 (minor) =19.6 min.

**HRMS analysis (ESI):** calculated for  $[M+H]^+$ : C<sub>22</sub>H<sub>28</sub>ClN<sub>4</sub>O<sub>5</sub>S: 495.1469; Found: 495.1473.

**Optical activity:**  $[\alpha]_D^{20} = +39.7$  (c = 0.2, CHCl<sub>3</sub>) (99% *ee*)

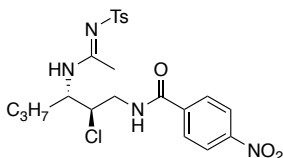

**3h**, *N*-((2*R*,3*S*)-2-chloro-3-*N*-tosylacetimidamido)hexyl)-4-nitrobenzamide

R<sub>f</sub>: 0.10 (50% EtOAC/Hex)

Compound **3h** (32.1 mg, 65% yield, 95% *ee*) was synthesized following the procedure detailed in Section III using **1a** (24.8 mg, 0.10 mmol) as starting material.

**<sup>1</sup>H NMR (500 MHz, CDCl<sub>3</sub>)** δ 8.25 (d, *J* = 8.8 Hz, 2H), 8.01 (d, *J* = 8.8 Hz, 2H), 7.71 (d, *J* = 8.3 Hz, 2H), 7.23 (d, *J* = 8.0 Hz, 2H), 7.13 (dd, *J* = 7.0, 4.8 Hz, 1H), 5.99 (d, *J* = 8.7 Hz, 1H), 4.37 (tt, *J* = 10.3, 8.4, 3.1 Hz, 1H), 4.24 (q, *J* = 5.7 Hz, 1H), 4.14 (ddd, *J* = 13.7, 7.8, 5.6 Hz, 1H), 3.49 (ddd, *J* = 14.3, 6.1, 4.5 Hz, 1H), 2.39 (s, *J* = 1.8 Hz, 6H), 1.81 (dddd, *J* = 13.6, 9.8, 6.8, 2.9 Hz, 1H), 1.56 (dtd, *J* = 14.6, 10.1, 4.6 Hz, 1H), 1.45 – 1.32 (m, 1H), 1.32-1.22 (m, 1H), 0.89 (t, *J* = 7.3 Hz, 3H).

**<sup>13</sup>C NMR (126 MHz, CDCl<sub>3</sub>)** δ 166.9, 166.1, 149.7, 142.9, 139.7, 139.3, 129.5, 128.5, 126.3, 123.8, 62.5, 53.3, 42.9, 31.8, 21.5, 21.2, 19.0, 13.7.

**Resolution of enantiomers:** DAICEL Chiralpak®, IA 15% IPA/Hexane 1 ml/min, 254 nm, RT 1 (minor)=11.4 min, RT 2 (major) =17.3 min.

**HRMS analysis (ESI):** calculated for  $[M+H]^+$ : C<sub>22</sub>H<sub>28</sub>ClN<sub>4</sub>O<sub>5</sub>S: 495.1469; Found: 495.1470.

**Optical activity:**  $[\alpha]_D^{20} = -15.8$  (c = 0.1, CHCl<sub>3</sub>, 95% *ee*)

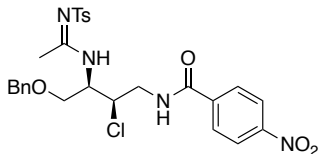

**3p**, *N*-((2*R*,3*R*)-4-(benzyloxy)-2-chloro-3-(*N*'-tosylacetimidamido)butyl)-4-nitrobenzamide

The substrate **1p** (0.1 mmol, 1.0 equiv) and (DHQD)<sub>2</sub>PHAL (3.9 mg, 5 mol%) were suspended in acetonitrile (2 mL) in a test tube with a magnetic stir bar and capped with a rubber septa. HFIP (105  $\mu$ L, 1.0 mmol, 10 equiv) was added via syringe. The resulting suspension was cooled to 0  $^{\circ}$ C in an immersion cooler. After stirring for 10 min Dichloramine-T (48.0 mg, 0.2 mmol, 2 equiv) was added. The reaction was monitored by TLC and upon completion was quenched by the addition of saturated Na<sub>2</sub>S<sub>2</sub>O<sub>3</sub> (2 mL). The reaction was concentrated to remove acetonitrile and the resultant aqueous layer was extracted with DCM (3 x 5 mL). The combined organic layers were dried with anhydrous Na<sub>2</sub>SO<sub>4</sub> and concentrated. Column chromatography (SiO<sub>2</sub>/EtOAc–Hexanes gradient) provided the desired product **3p** in a 65% yield (34.3 mg, 96% *ee*).

R<sub>f</sub>: 0.10 (50% EtOAc/Hex)

**<sup>1</sup>H NMR (500 MHz, CDCl<sub>3</sub>)**  $\delta$  8.27 (d, *J* = 8.8 Hz, 2H), 8.20 (d, *J* = 8.8 Hz, 2H), 7.93 (dd, *J* = 7.6, 5.1 Hz, 1H), 7.71 (d, *J* = 8.3 Hz, 2H), 7.32 – 7.28 (m, 3H), 7.26 – 7.20 (m, 4H), 5.79 (d, *J* = 8.8 Hz, 1H), 4.78 (dtd, *J* = 8.6, 6.7, 1.5 Hz, 1H), 4.51 – 4.42 (m, 2H), 4.37 (ddd, *J* = 11.0, 4.7, 1.5 Hz, 1H), 4.22 (ddd, *J* = 13.6, 7.5, 4.8 Hz, 1H), 3.60 (qd, *J* = 10.0, 6.6 Hz, 2H), 3.13 (ddd, *J* = 13.7, 10.9, 5.1 Hz, 1H), 2.40 (s, 3H), 2.39 (s, 3H).

**<sup>13</sup>C NMR (126 MHz, CDCl<sub>3</sub>)**  $\delta$  168.3, 165.6, 149.8, 143.3, 138.9, 138.6, 136.9, 129.7, 128.9, 128.6, 128.2, 127.8, 126.5, 123.7, 73.4, 69.3, 58.1, 51.2, 43.1, 21.5, 20.9.

**Resolution of enantiomers:** DAICEL Chiralcel®, OD-H 17.5% IPA/Hexane 1 ml/min, 254 nm, RT 1 (major)=27.1 min, RT 2 (minor) =42.8 min.

**HRMS analysis (ESI):** calculated for [M+H]<sup>+</sup>: C<sub>27</sub>H<sub>30</sub>ClN<sub>4</sub>O<sub>6</sub>S: 573.1575; Found: 573.1577.

**Optical activity:** [ $\alpha$ ]<sub>D</sub><sup>20</sup> = +29.5 (c = 0.1, CHCl<sub>3</sub>, 95% *ee*)



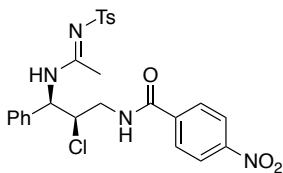

**3s**, *N*-((2*R*,3*S*)-2-chloro-3-phenyl-3-((*N*'-tosylacetimidamido)propyl)-4-nitrobenzamide  
*R*<sub>f</sub>: 0.20 (50% EtOAC/Hex)

Compound **3s** (17.2 mg, 54% yield, 99% *ee*) was synthesized following the procedure detailed in Section III using **1s** (14.1 mg, 0.05 mmol) as starting material.

**<sup>1</sup>H NMR (500 MHz, CDCl<sub>3</sub>)** δ 8.28 (d, *J* = 8.9 Hz, 2H), 8.20 (d, *J* = 8.9 Hz, 2H), 8.00 – 7.88 (m, 1H), 7.72 (d, *J* = 8.3 Hz, 2H), 7.43 – 7.31 (m, 3H), 7.31 – 7.22 (m, 4H), 6.13 (d, *J* = 9.3 Hz, 1H), 5.82 (d, *J* = 9.0 Hz, 1H), 4.68 (ddd, *J* = 10.8, 4.9, 1.5 Hz, 1H), 4.28 (ddd, *J* = 13.7, 7.1, 4.9 Hz, 1H), 3.25 (ddd, *J* = 13.8, 10.7, 5.3 Hz, 1H), 2.51 (s, 3H), 2.40 (s, 3H).

**<sup>13</sup>C NMR (126 MHz, CDCl<sub>3</sub>)** δ 167.4, 165.8, 149.8, 143.4, 138.9, 138.5, 136.2, 129.7, 129.0, 128.9, 128.7, 126.7, 126.5, 123.8, 60.6, 53.9, 43.8, 21.5, 21.3.

**Resolution of enantiomers:** DAICEL Chiralpak®, IA 20% IPA/Hexane 1 ml/min, 254 nm, RT 1 (major)=32.0 min, RT 2 (minor)=41.3 min.

**HRMS analysis (ESI):** calculated for [M+H]<sup>+</sup>: C<sub>25</sub>H<sub>26</sub>ClN<sub>4</sub>O<sub>5</sub>S: 529.1312; Found: 592.1312.

**Optical activity:** [α]<sub>D</sub><sup>20</sup> = +120.2 (c = 0.1, CHCl<sub>3</sub>, 99% *ee*)

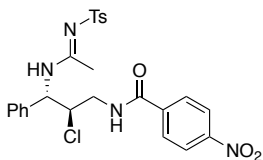

**3s-Diastereomer**, *N*-((2*R*,3*R*)-2-chloro-3-phenyl-3-((*N*'-tosylacetimidamido)propyl)-4-nitrobenzamide

*R*<sub>f</sub>: 0.12 (50% EtOAC/Hex)

**<sup>1</sup>H NMR (500 MHz, CD<sub>3</sub>CN)** δ 8.27 (d, *J* = 8.9 Hz, 2H), 7.97 (d, *J* = 8.9 Hz, 2H), 7.59 (d, *J* = 8.2 Hz, 2H), 7.56 – 7.47 (m, 2H), 7.46 – 7.34 (m, 5H), 7.26 (d, *J* = 8.0 Hz, 2H), 5.44 (dd, *J* = 8.4, 6.5 Hz, 1H), 4.70 (td, *J* = 6.8, 4.6 Hz, 1H), 3.91 (dt, *J* = 14.4, 5.4 Hz, 1H), 3.51 (dt, *J* = 14.3, 6.4 Hz, 1H), 2.38 (s, 3H), 2.37 (s, 3H).

<sup>13</sup>C NMR (126 MHz, CDCl<sub>3</sub>) δ 166.0, 165.8, 149.8, 142.7, 139.6, 139.0, 136.2, 129.4, 129.0, 128.9, 128.4, 127.7, 126.4, 123.8, 61.6, 57.8, 43.2, 21.5, 21.3.

**Resolution of enantiomers:** DAICEL Chiralpak®, IA 22% IPA/Hexane 1 ml/min, 254 nm, RT 1 (minor)=11.9 min, RT 2 (minor) =35.3 min

**HRMS analysis (ESI):** calculated for [M+H]<sup>+</sup>: C<sub>25</sub>H<sub>26</sub>ClN<sub>4</sub>O<sub>5</sub>S: 529.1312; Found: 592.1312.

**Optical activity:** [α]<sub>D</sub><sup>20</sup> = +54.2 (c = 0.1, CHCl<sub>3</sub>, 97% ee)

**c. Analytical data for derivatives:**

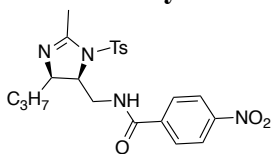

**5a**, *N*-(((4*R*,5*S*)-2-(methyl)-4-propyl-1-tosyl-4,5-dihydro-1*H*-imidazol-5-yl)methyl)-4-nitrobenzamide

To a solution of **3a** (49.4 mg, 0.1 mmol, 1 equiv) in acetonitrile (1 mL) at room temperature, Cs<sub>2</sub>CO<sub>3</sub> was added and allowed to stir for 48 h. The reaction was quenched with the addition of water (3 mL) and extracted with DCM (3 x 4 mL). The combined organic layers were dried with anhydrous Na<sub>2</sub>SO<sub>4</sub> and concentrated in vacuo. Column chromatography (SiO<sub>2</sub>/EtOAc–Hexanes gradient) gave the desired product **5a** in a 57% yield (26.2 mg).

R<sub>f</sub>: 0.55 (60% EtOAc/Hex)

<sup>1</sup>H NMR (500 MHz, CDCl<sub>3</sub>) δ 8.31 (d, *J* = 8.9 Hz, 2H), 8.09 (d, *J* = 8.8 Hz, 2H), 7.70 (d, *J* = 8.4 Hz, 2H), 7.55 – 7.47 (m, 1H), 7.39 – 7.32 (m, 2H), 4.18 (ddd, *J* = 11.2, 8.3, 2.7 Hz, 1H), 3.81 (ddd, *J* = 13.9, 6.4, 2.7 Hz, 1H), 3.46 – 3.35 (m, 1H), 3.27 (ddd, *J* = 14.2, 11.3, 3.0 Hz, 1H), 2.45 (s, 3H), 2.37 (d, *J* = 2.2 Hz, 3H), 1.62 – 1.46 (m, 2H), 1.38 – 1.28 (m, 2H), 0.90 (t, *J* = 7.0 Hz, 3H).

<sup>13</sup>C NMR (126 MHz, CDCl<sub>3</sub>) δ 165.7, 155.7, 149.7, 145.4, 139.6, 135.6, 130.5, 128.4, 126.7, 123.9, 67.6, 62.4, 39.8, 31.3, 21.7, 20.9, 17.9, 14.0.

**HRMS analysis (ESI):** calculated for [M+H]<sup>+</sup>: C<sub>22</sub>H<sub>27</sub>N<sub>4</sub>O<sub>5</sub>S: 459.1702; Found: 459.1700.

**Optical activity:** [α]<sub>D</sub><sup>20</sup> = +183.2 (c = 0.5, CHCl<sub>3</sub>, 99% ee)

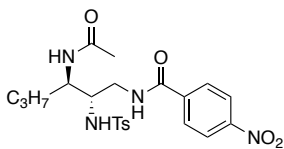

**6a**, *N*-((2*S*,3*R*)-3-acetamido-2-((4-methylphenyl)sulfonamido)hexyl)-4-nitrobenzamide

R<sub>f</sub>: 0.25 (60% EtOAc/Hex)

Imidazoline **5a** (26.2 mg, 0.57 mmol), acetonitrile (1 mL) and a solution of HCl (1 M, 0.2 mL) were added to a vial and stirred for 15 min. Water (3 mL) was added and the solution was concentrated in vacuo and extracted with DCM (3 x 4 mL). The combined organic layers were dried with anhydrous Na<sub>2</sub>SO<sub>4</sub> and concentrated. Column chromatography (SiO<sub>2</sub>/EtOAc–Hexanes gradient) provided the desired product **6a** in a 99% yield (27.1 mg, 99% *ee*).

**<sup>1</sup>H NMR (500 MHz, CDCl<sub>3</sub>)** δ 8.31 (d, *J* = 8.8 Hz, 2H), 8.05 (d, *J* = 8.8 Hz, 2H), 7.86 (d, *J* = 8.3 Hz, 2H), 7.77 (s, 1H), 7.34 (d, *J* = 8.5 Hz, 2H), 6.66 (d, *J* = 6.6 Hz, 1H), 5.66 (d, *J* = 7.8 Hz, 1H), 3.69 (dq, *J* = 8.7, 4.4 Hz, 1H), 3.60 (dd, *J* = 10.7, 6.6 Hz, 1H), 3.35 – 3.17 (m, 2H), 2.43 (s, 3H), 2.00 (s, 3H), 1.63-1.57 (m, 1H), 1.44 – 1.33 (m, 1H), 1.23 – 1.13 (m, 2H), 0.77 (t, *J* = 7.3 Hz, 3H).

**<sup>13</sup>C NMR (126 MHz, CDCl<sub>3</sub>)** δ 172.6, 166.3, 149.8, 143.9, 139.0, 136.8, 129.9, 128.4, 127.3, 123.9, 57.6, 52.3, 40.5, 33.6, 23.1, 21.6, 19.3, 13.4.

**Resolution of enantiomers:** DAICEL Chiralpak®, AD-H 15% IPA/Hexane 1 ml/min, 254 nm, RT 1 (minor)=15.2 min, RT 2 (major) =22.8 min

**HRMS analysis (ESI):** calculated for [M+H]<sup>+</sup>: C<sub>22</sub>H<sub>29</sub>ClN<sub>4</sub>O<sub>5</sub>S: 477.1808; Found: 477.1804.

**Optical activity:** [α]<sub>D</sub><sup>20</sup> = +65.2 (c = 0.2, CHCl<sub>3</sub>, 99% *ee*)

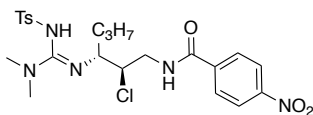

**7a**, *N*-((2*R*,3*R*)-2-chloro-3-(((*Z*)-(dimethylamino)((4-methylphenyl)sulfonamido)methylene)amino)hexyl)-4-nitrobenzamide

The substrate **1a** (24.8 mg, 0.1 mmol, 1.0 equiv), (DHQD)<sub>2</sub>PHAL (0.8 mg, 1 mol%), and MS4Å (20 mg) were suspended in dimethylcyanamide (1 mL) in a test tube with a

magnetic stir bar and capped with a rubber septa. HFIP (105  $\mu$ L, 1.0 mmol, 10 equiv) was added via syringe. The resulting suspension was cooled to 0  $^{\circ}$ C in an immersion cooler. After stirring for 10 min dichloramine-T (48.0 mg, 0.2 mmol, 2 equiv) was added. The reaction was monitored by TLC and upon completion was quenched by the addition of saturated  $\text{Na}_2\text{S}_2\text{O}_3$  (2 mL). The reaction was concentrated to remove acetonitrile and the resultant aqueous layer was extracted with DCM (3 x 5 mL). The combined organic layers were dried with anhydrous  $\text{Na}_2\text{SO}_4$  and concentrated. Column chromatography ( $\text{SiO}_2/\text{EtOAc}$ –Hexanes gradient) provided the desired product **7a** in an 82% yield (42.9 mg, 98% *ee*).

R<sub>f</sub>: 0.35 (70% EtOAc/Hex)

**$^1\text{H}$  NMR (500 MHz,  $\text{CDCl}_3$ )**  $\delta$  8.66 – 8.54 (m, 1H), 8.25 (d,  $J$  = 8.9 Hz, 2H), 8.17 (d,  $J$  = 8.9 Hz, 2H), 7.72 (d,  $J$  = 8.3 Hz, 2H), 7.20 (d,  $J$  = 8.3 Hz, 2H), 5.09 (d,  $J$  = 9.9 Hz, 1H), 4.67 – 4.54 (m, 1H), 4.33 – 4.18 (m, 2H), 3.30 (ddd,  $J$  = 13.3, 10.1, 4.9 Hz, 1H), 3.05 (s, 6H), 2.37 (s, 3H), 1.67 – 1.53 (m, 2H), 1.42 – 1.29 (m, 1H), 1.28 – 1.17 (m, 1H), 0.88 (t,  $J$  = 7.4 Hz, 3H).

**$^{13}\text{C}$  NMR (126 MHz,  $\text{CDCl}_3$ )**  $\delta$  165.8, 156.7, 149.6, 142.1, 141.8, 139.1, 129.3, 128.9, 125.4, 123.6, 61.5, 53.7, 42.7, 39.3, 36.3, 21.4, 19.1, 13.7.

**Resolution of enantiomers:** DAICEL Chiralpak®, IA 16% IPA/Hexane 1ml/min, 254 nm, RT 1 (major)=43.8 min, RT 2 (minor) =51.9 min.

**HRMS analysis (ESI):** calculated for  $[\text{M}+\text{H}]^+$ :  $\text{C}_{23}\text{H}_{31}\text{N}_5\text{O}_5\text{S}$ : 524.1735; Found: 524.1732.

**Optical activity:**  $[\alpha]_{\text{D}}^{20} = -31.9$  ( $c = 0.50$ ,  $\text{CHCl}_3$ ) (98% *ee*)

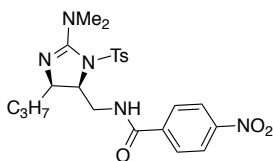

**8a**, *N*-(((4*R*,5*S*)-2-(dimethylamino)-4-propyl-1-tosyl-4,5-dihydro-1*H*-imidazol-5-yl)methyl)-4-nitrobenzamide

**7a** (26.2 mg, 0.05 mmol) was added to a 10 mL test tube with a magnetic stir bar. DMF (0.5 mL) was added via syringe. The reaction was heated to 80  $^{\circ}$ C and monitored by TLC. After the reaction reached competition reaction, it was cooled, quenched with water

(5 mL) and extracted with dichloromethane (3x 5 mL). The combined organic layers were dried with anhydrous Na<sub>2</sub>SO<sub>4</sub> and concentrated in vacuo. Column chromatography (SiO<sub>2</sub>/EtOAc–Hexanes gradient) provided the desired product **8a** in a 62% yield (15.1 mg).

R<sub>f</sub>: 0.30 (100% EtOAc)

<sup>1</sup>H NMR (500 MHz, CDCl<sub>3</sub>) δ 8.32 (d, *J* = 8.5 Hz, 2H), 8.10 (d, *J* = 8.4 Hz, 2H), 7.73 (d, *J* = 8.0 Hz, 2H), 7.48 (t, *J* = 4.5 Hz, 1H), 7.37 (d, *J* = 8.0 Hz, 2H), 3.87 (dt, *J* = 11.1, 2.9 Hz, 1H), 3.59 (ddd, *J* = 13.9, 5.8, 3.3 Hz, 1H), 3.38 (ddd, *J* = 14.2, 11.0, 3.5 Hz, 1H), 3.25 (ddd, *J* = 8.8, 6.1, 2.2 Hz, 1H), 2.92 (s, 6H), 2.46 (s, 3H), 1.20 – 0.93 (m, 2H), 0.63 (t, *J* = 7.3 Hz, 3H), 0.57 (ddd, *J* = 16.5, 9.0, 5.3 Hz, 1H), -0.16 (dtd, *J* = 14.0, 9.6, 5.1 Hz, 1H).

<sup>13</sup>C NMR (126 MHz, CDCl<sub>3</sub>) δ 165.6, 156.0, 149.6, 145.5, 139.6, 133.3, 130.0, 128.4, 127.9, 123.9, 66.6, 64.5, 44.7, 41.6, 38.0, 21.6, 18.9, 13.7.

**HRMS analysis (ESI):** calculated for [M+H]<sup>+</sup>: C<sub>23</sub>H<sub>30</sub>N<sub>5</sub>O<sub>5</sub>S: 488.1968; Found: 488.1978.

**Optical activity:** [α]<sub>D</sub><sup>20</sup> = +40.2 (c = 0.25, CHCl<sub>3</sub>)

**d. Analytical data for miscellaneous products/byproducts:**

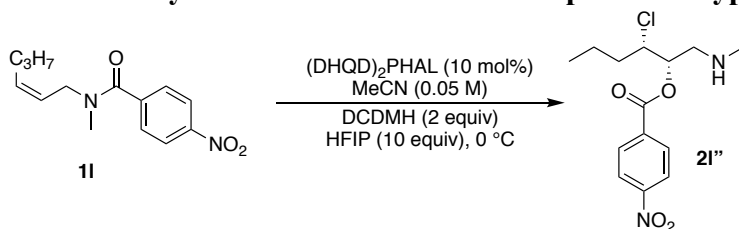

**21''**, *N*-((2*R*,3*R*)-3-chloro-2-hydroxyhexyl)-*N*-methyl-4-nitrobenzamide

**11** (0.1 mmol, 1.0 equiv) and (DHQD)<sub>2</sub>PHAL (7.8 mg, 10 mol%) were suspended in acetonitrile (2 mL) in a test tube with a magnetic stir bar and capped with a rubber septa. HFIP (105 μL, 1.0 mmol, 10 equiv) was added via a syringe. The resulting suspension was cooled to 0 °C in an immersion cooler. After stirring for 10 min, DCDMH (39.4 mg, 0.2 mmol, 2 equiv) was added. Upon completion, the reaction was quenched by the addition of saturated Na<sub>2</sub>S<sub>2</sub>O<sub>3</sub> (2 mL). The reaction was concentrated to remove the acetonitrile and the resultant aqueous layer was extracted with DCM (3 x 5 mL). The combined organics were concentrated. The combined organic layers were dried with

anhydrous Na<sub>2</sub>SO<sub>4</sub> and concentrated. Column chromatography (SiO<sub>2</sub>/EtOAc–Hexanes gradient) provided **2I''** (25.1 mg, 80% yield, 19% *ee*).

R<sub>f</sub> 0.68 (20% EtOAc/Hex)

**<sup>1</sup>H NMR (500 MHz, CDCl<sub>3</sub>)** δ 8.32 (d, *J* = 9.0 Hz, 2H), 8.27 (d, *J* = 9.0 Hz, 2H), 5.68 (td, *J* = 6.2, 2.2 Hz, 1H), 4.30 (ddd, *J* = 8.2, 5.8, 2.2 Hz, 1H), 3.31 (dd, *J* = 6.1, 1.7 Hz, 2H), 3.01 (s, 3H), 1.84 – 1.69 (m, 2H), 1.69 – 1.55 (m, 2H), 1.56 – 1.42 (m, 1H), 0.94 (t, *J* = 7.3 Hz, 3H).

**<sup>13</sup>C NMR (126 MHz, CDCl<sub>3</sub>)** δ 163.8, 150.8, 134.9, 131.1, 123.7, 73.5, 66.2, 61.6, 53.7, 37.0, 19.8, 13.4.

**Resolution of enantiomers:** DAICEL Chiralpak®, AD-H 5% IPA/Hexane 1 ml/min, 254 nm, RT 1 (minor)=6.6 min, RT 2 (major)=7.9 min.

**HRMS analysis (ESI):** calculated for [M+H]<sup>+</sup>: C<sub>14</sub>H<sub>20</sub>ClN<sub>2</sub>O<sub>4</sub>: 315.1111; Found: 315.1108

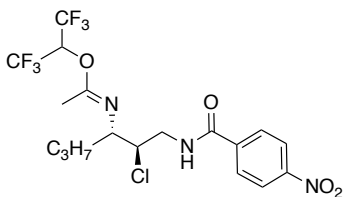

**4h**, 1,1,1,3,3,3-hexafluoropropan-2-yl-*N*-((2*R*,3*S*)-2-chloro-1-(4-nitrobenzamido)hexan-3-yl)acetimidate

R<sub>f</sub>: 0.39 (25% EtOAc/Hex)

**<sup>1</sup>H NMR (500 MHz, CDCl<sub>3</sub>)** δ 8.32 (d, *J* = 8.8 Hz, 2H), 7.96 (d, *J* = 8.8 Hz, 2H), 6.54 (s, 1H), 6.34 (hept, *J* = 6.5 Hz, 1H), 4.32 – 4.21 (m, 2H), 3.69 (dt, *J* = 9.2, 4.0 Hz, 1H), 3.34 (ddd, *J* = 13.8, 9.6, 4.0 Hz, 1H), 2.08 (s, 3H), 1.75 (tdd, *J* = 10.1, 6.2, 3.0 Hz, 1H), 1.64 (ddt, *J* = 18.7, 9.6, 5.0 Hz, 1H), 1.34 – 1.17 (m, 2H), 0.94 (t, *J* = 7.3 Hz, 3H).

**<sup>13</sup>C NMR (126 MHz, CDCl<sub>3</sub>)** δ 165.5, 158.7, 149.8, 139.6, 128.2, 124.0, 65.5, 62.5, 42.3, 35.9, 19.4, 14.7, 13.9 (note the trifluoromethyl carbons and the methine of the HFIP addition are not listed since they could not be assigned with confidence, presumably due to their splitting, which led to small intensity in the NMR spectrum).

**<sup>19</sup>F NMR (470 MHz, CDCl<sub>3</sub>)** δ -73.01 – -73.10 (m), -73.29 – -73.44 (m).

**HRMS analysis (ESI):** calculated for  $[M+H]^+$ :  $C_{18}H_{21}ClF_6N_3O_4$ : 492.1125, found: 492.1110

**Optical activity:**  $[\alpha]_D^{20} = 27.9$  ( $c = 0.20$ ,  $CHCl_3$ )

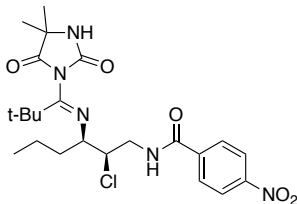

**S3a/b**, *N*-((2*R*,3*R*)-2-chloro-3-(((1-(4,4-dimethyl-2,5-dioxoimidazolidin-1-yl)-2,2-dimethylpropylidene)amino)hexyl)-4-nitrobenzamide

*Less polar rotamer*

R<sub>f</sub>: 0.25 (30% EtOAc/Hex)

**<sup>1</sup>H NMR (500 MHz, CDCl<sub>3</sub>)** δ 8.25 (d,  $J = 8.8$  Hz, 2H), 8.09 (d,  $J = 8.8$  Hz, 2H), 7.77 (t, 1H,  $J = 7.5$  Hz), 6.23 (s, 1H), 4.20 (ddd,  $J = 9.8, 4.8, 1.9$  Hz, 1H), 4.15 – 4.04 (m, 1H), 3.45 (ddd,  $J = 9.2, 5.1, 1.9$  Hz, 1H), 3.35 (ddd,  $J = 13.4, 9.9, 5.1$  Hz, 1H), 1.89 (dtd,  $J = 13.2, 9.3, 4.4$  Hz, 1H), 1.56 (s, 3H), 1.48 (s, 3H), 1.27 (s, 9H), 1.32-1.11 (m, 3H), 0.85 (t,  $J = 7.2$  Hz, 3H).

**<sup>13</sup>C NMR (126 MHz, CDCl<sub>3</sub>)** δ 175.5, 165.5, 155.4, 154.9, 149.3, 139.6, 128.8, 123.6, 60.1, 60.0, 59.4, 43.4, 41.3, 34.3, 28.4, 25.4, 25.3, 18.8, 14.0.

**S3a/b**, *More polar rotamer*

R<sub>f</sub>: 0.25 (30% EtOAc/Hex)

**<sup>1</sup>H NMR (500 MHz, CDCl<sub>3</sub>)** δ 8.29 (d,  $J = 8.9$  Hz, 2H), 8.05 (d,  $J = 8.8$  Hz, 2H), 7.29 (t,  $J = 6.3$  Hz, 1H), 5.79 (s, 1H), 4.22 (ddd,  $J = 8.9, 5.7, 2.2$  Hz, 1H), 3.98 (ddd,  $J = 13.7, 6.8, 5.7$  Hz, 1H), 3.48 (td,  $J = 8.7, 4.5$  Hz, 1H), 3.35 (td,  $J = 5.6, 2.7$  Hz, 1H), 1.96 – 1.85 (m, 1H), 1.68 (s, 3H), 1.52 (s, 3H), 1.41 – 1.28 (m, 3H), 1.25 (s, 9H), 0.85 (t,  $J = 7.2, 3H$ ).

**<sup>13</sup>C NMR (126 MHz, CDCl<sub>3</sub>)** δ 177.0, 165.6, 155.3, 153.5, 149.6, 139.5, 128.6, 123.6, 60.6, 59.7, 59.7, 43.5, 41.2, 33.5, 28.4, 25.6, 25.2, 18.7, 13.8.

**HRMS analysis (ESI):** calculated for  $[M+H]^+$ :  $C_{23}H_{33}ClN_5O_5$ : 494.2170; Found: 494.2149

**Optical activity:**  $[\alpha]_{\text{D}}^{20} = +40.2$  ( $c = 0.25$ ,  $\text{CHCl}_3$ )

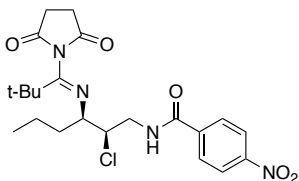

**S4**, *N*-((2*R*,3*R*)-2-chloro-3-(((1-(2,5-dioxopyrrolidin-1-yl)-2,2-dimethylpropylidene)amino)hexyl)-4-nitrobenzamide

$R_f$ : 0.20 (30% EtOAC/Hex)

**$^1\text{H}$  NMR (500 MHz,  $\text{CDCl}_3$ )**  $\delta$  8.29 (d,  $J = 8.8$  Hz, 2H), 8.02 (d,  $J = 8.8$  Hz, 2H), 7.16 – 7.09 (m, 1H), 4.19 (ddd,  $J = 8.2, 6.4, 2.2$  Hz, 1H), 3.85 (dt,  $J = 13.9, 6.4$  Hz, 1H), 3.57 (ddd,  $J = 13.8, 8.0, 5.7$  Hz, 1H), 3.24 (ddd,  $J = 8.0, 5.4, 2.3$  Hz, 1H), 2.97 – 2.62 (m, 4H), 1.94 – 1.81 (m, 1H), 1.33 – 1.23 (m, 3H), 1.21 (s, 9H), 0.84 (t,  $J = 7.1$  Hz, 3H).

**$^{13}\text{C}$  NMR (126 MHz,  $\text{CDCl}_3$ )**  $\delta$  176.6, 175.1, 165.4, 156.5, 149.6, 139.5, 128.5, 123.7, 61.3, 60.3, 43.6, 40.8, 33.6, 28.7, 28.7, 28.4, 18.7, 13.9.

**HRMS analysis (ESI):** calculated for  $[\text{M}+\text{H}]^+$ :  $\text{C}_{22}\text{H}_{30}\text{ClN}_4\text{O}_5$ : 465.1905; Found: 465.1907

**Optical activity:**  $[\alpha]_{\text{D}}^{20} = +63.8$  ( $c = 0.35$ ,  $\text{CHCl}_3$ )

**e. Analytical data for starting materials:**

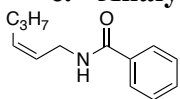

**1b**, (*Z*)-*N*-(hex-2-en-1-yl)benzamide

$R_f$ : 0.26 (20% EtOAC/Hex)

**$^1\text{H}$  NMR (500 MHz,  $\text{CDCl}_3$ )**  $\delta$  7.81-7.76 (m, 2H), 7.53 – 7.47 (m, 1H), 7.46-7.41 (m, 2H), 6.06 (s, 1H), 5.64 (dt,  $J = 10.3, 7.4, 1.4$  Hz, 1H), 5.53 (dt,  $J = 10.7, 7.0, 1.5$  Hz, 1H), 4.11 (t,  $J = 6.1$  Hz, 2H), 2.13 (q,  $J = 7.4$  Hz, 2H), 1.43 (dt,  $J = 14.8, 7.4$  Hz, 2H), 0.94 (t,  $J = 7.3$  Hz, 3H).

**$^{13}\text{C}$  NMR (126 MHz,  $\text{CDCl}_3$ )**  $\delta$  167.5, 134.7, 134.3, 131.5, 128.7, 127.0, 125.3, 37.3, 29.6, 22.8, 13.9.

**HRMS analysis (ESI):** calculated for  $[\text{M}+\text{H}]^+$ :  $\text{C}_{13}\text{H}_{18}\text{NO}$ : 204.1388; Found: 204.1386



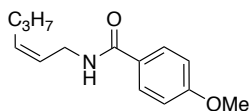

**1c**, (*Z*)-*N*-(hex-2-en-1-yl)-4-methoxybenzamide

R<sub>f</sub>: 0.38 (20% EtOAC/Hex)

**<sup>1</sup>H NMR (500 MHz, CDCl<sub>3</sub>)** δ 7.74 (d, *J* = 8.9 Hz, 2H), 6.93 (d, *J* = 8.9 Hz, 2H), 5.94 (s, 1H), 5.63 (dt, *J* = 10.4, 7.3, 1.4 Hz, 1H), 5.56 – 5.46 (m, 1H), 4.10 (t, *J* = 6.1 Hz, 2H), 3.86 (s, 3H), 2.13 (q, *J* = 6.7 Hz, 2H), 1.43 (h, *J* = 7.4 Hz, 2H), 0.94 (t, *J* = 7.4 Hz, 3H).

**<sup>13</sup>C NMR (126 MHz, CDCl<sub>3</sub>)** δ 166.9, 162.1, 134.0, 128.6, 126.9, 125.2, 113.7, 55.4, 37.1, 29.4, 22.7, 13.7.

**HRMS analysis (ESI):** calculated for [M+H]<sup>+</sup>: C<sub>14</sub>H<sub>20</sub>NO<sub>2</sub>: 234.1494; Found: 234.1490

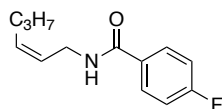

**1d**, (*Z*)-4-fluoro-*N*-(hex-2-en-1-yl)benzamide

R<sub>f</sub>: 0.15 (10% EtOAC/Hex)

**<sup>1</sup>H NMR (500 MHz, CDCl<sub>3</sub>)** δ 7.78 (dd, *J* = 8.6, 5.3 Hz, 2H), 7.09 (t, *J* = 8.6 Hz, 2H), 6.11 (s, 1H), 5.67 – 5.56 (m, 1H), 5.56 – 5.46 (m, 1H), 4.08 (t, *J* = 6.1 Hz, 2H), 2.11 (q, *J* = 7.4 Hz, 2H), 1.41 (h, *J* = 7.3 Hz, 2H), 0.92 (t, *J* = 7.4 Hz, 3H).

**<sup>13</sup>C NMR (126 MHz, CDCl<sub>3</sub>)** δ 166.4, 164.7 (d, *J* = 251.8 Hz), 134.2, 130.7 (d, *J* = 3.3 Hz), 129.2 (d, *J* = 9.0 Hz), 124.9, 115.6 (d, *J* = 21.9 Hz), 37.3, 29.4, 22.6, 13.7.

**<sup>19</sup>F NMR (470 MHz, CDCl<sub>3</sub>)** δ -108.40.

**HRMS analysis (ESI):** calculated for [M+H]<sup>+</sup>: C<sub>13</sub>H<sub>17</sub>FNO: 222.1294; Found: 222.1287

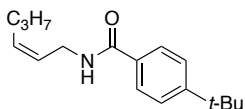

**1e**, (*Z*)-4-(*tert*-butyl)-*N*-(hex-2-en-1-yl)benzamide

R<sub>f</sub>: 0.33 (20% EtOAC/Hex)

**<sup>1</sup>H NMR (500 MHz, CDCl<sub>3</sub>)** δ 7.71 (d, *J* = 8.5 Hz, 2H), 7.45 (d, *J* = 8.5 Hz, 2H), 5.99 (s, 1H), 5.63 (dt, *J* = 10.4, 7.3, 1.4 Hz, 1H), 5.57 – 5.48 (m, 1H), 4.11 (t, *J* = 6.1 Hz, 2H), 2.13 (q, *J* = 7.6, 2H), 1.43 (h, *J* = 7.3 Hz, 2H), 1.34 (s, 9H), 0.94 (t, *J* = 7.3 Hz, 3H).

**<sup>13</sup>C NMR (126 MHz, CDCl<sub>3</sub>)** δ 167.3, 154.9, 134.1, 131.7, 126.7, 125.5, 125.2, 37.1, 34.9, 31.2, 29.4, 22.7, 13.7.

**HRMS analysis (ESI):** calculated for [M+H]<sup>+</sup>: C<sub>17</sub>H<sub>26</sub>NO: 260.2014; Found: 260.2011

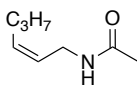

**1g**, (*Z*)-*N*-(hex-2-en-1-yl)acetamide

R<sub>f</sub>: 0.23 (70% EtOAC/Hex)

**<sup>1</sup>H NMR (500 MHz, CDCl<sub>3</sub>)** δ 5.56 (dt, *J* = 10.6, 7.5, 1.6 Hz, 1H), 5.46 (s, 1H), 5.40 (dt, *J* = 10.8, 7.0, 1.6 Hz, 1H), 3.88 (t, *J* = 6.0 Hz, 2H), 2.04 (q, *J* = 7.6 Hz, 2H), 1.98 (s, 3H), 1.38 (h, *J* = 7.3 Hz, 2H), 0.90 (t, *J* = 7.4 Hz, 3H).

**<sup>13</sup>C NMR (126 MHz, CDCl<sub>3</sub>)** δ 169.9, 133.8, 125.1, 36.8, 29.3, 23.3, 22.6, 13.7.

**HRMS analysis (ESI):** calculated for [M+H]<sup>+</sup>: C<sub>8</sub>H<sub>16</sub>NO: 142.1232; Found: 142.1229.

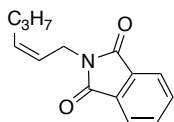

**1j**, (*Z*)-2-(hex-2-en-1-yl)isoindoline-1,3-dione

R<sub>f</sub>: 0.17 (10% EtOAC/Hex)

**<sup>1</sup>H NMR (500 MHz, CDCl<sub>3</sub>)** δ 7.84 (dd, *J* = 5.4, 3.1 Hz, 2H), 7.70 (dd, *J* = 5.4, 3.0 Hz, 2H), 5.64 – 5.55 (m, 1H), 5.47 (dtd, *J* = 10.8, 7.0, 1.5 Hz, 1H), 4.32 (d, *J* = 7.0 Hz, 2H), 2.24 (q, *J* = 7.4 Hz, 2H), 1.44 (p, *J* = 7.3 Hz, 2H), 0.95 (t, *J* = 7.4 Hz, 3H).

**<sup>13</sup>C NMR (126 MHz, CDCl<sub>3</sub>)** δ 168.1, 134.4, 133.9, 132.3, 123.2, 123.0, 34.9, 29.3, 22.6, 13.8.

**HRMS analysis (ESI):** calculated for [M+H]<sup>+</sup>: C<sub>14</sub>H<sub>16</sub>NO<sub>2</sub>: 230.1181; Found: 230.1181

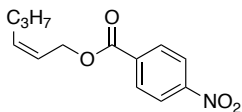

**1k**, (*Z*)-hex-2-en-1-yl 4-nitrobenzoate

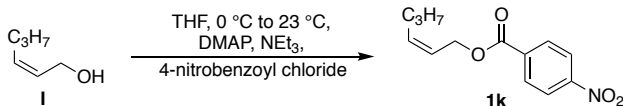

Alcohol **I** (400 mg, 4.0 mmol, 1.0 equiv) was placed in an oven-dried round bottom flask with stir bar under argon. THF (20 mL) and DMAP (12 mg, 0.1 mmol, 0.05 equiv) was added and the reaction was cooled to 0 °C, after which, 4-nitrobenzoyl chloride (814 mg, 4.4 mmol, 1.1 equiv) was added. Reaction progress was monitored by TLC and quenched at 2 h by the addition of water (5 mL). The reaction was concentrated in vacuo to remove THF. The aqueous phase was extracted with dichloromethane (3 x 10 mL). The combined organic layers were dried with anhydrous Na<sub>2</sub>SO<sub>4</sub> and concentrated. Column chromatography (SiO<sub>2</sub>/EtOAc–Hexanes gradient) provided **1j** in a 91% yield (909 mg).

R<sub>f</sub>: 0.33 (10% EtOAc/Hex)

**<sup>1</sup>H NMR (500 MHz, CDCl<sub>3</sub>)** δ 8.29 (d, *J* = 9.1 Hz, 2H), 8.22 (d, *J* = 9.0 Hz, 2H), 5.75 (dt, *J* = 11.0, 7.1, 1.0 Hz, 1H), 5.67 (dt, *J* = 11.0, 6.9, 1.3 Hz, 1H), 4.92 (d, *J* = 6.4 Hz, 2H), 2.21 – 2.11 (m, 2H), 1.44 (h, *J* = 7.4 Hz, 2H), 0.93 (t, *J* = 7.4 Hz, 3H).

**<sup>13</sup>C NMR (126 MHz, CDCl<sub>3</sub>)** δ 164.6, 150.5, 136.3, 135.7, 130.7, 123.5, 122.7, 61.7, 29.6, 22.5, 13.7.

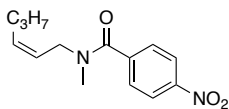

**11**, (*Z*)-*N*-(hex-2-en-1-yl)-*N*-methyl-4-nitrobenzamide

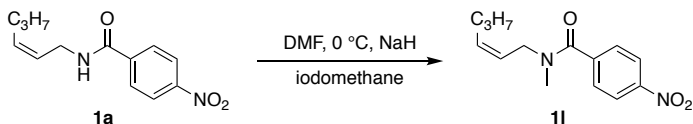

**1a** (124 mg, 0.5 mmol, 1.0 equiv) was added to a flame dried round bottom flask with stir bar under argon. Distilled DMF (5 mL) was added and the reaction was cooled to 0 °C. After stirring for 5 min, iodomethane (0.047 mL, 0.75 mmol, 1.5 equiv) was added via syringe and the reaction was slowly warmed to room temperature. The reaction was

monitored by TLC and reached completion at 1 h. It was again cooled to 0 °C. Water (1 mL) was added dropwise to quench the reaction. After the exotherm was complete, water (10 mL) and dichloromethane (5 mL) were added, and the organic layer was separated. The organics were washed with water (3 x 5 mL) and then concentrated. Column chromatography (SiO<sub>2</sub>/EtOAc–Hexanes gradient) provided **11** in a 88% yield (121.8 mg).

**11** exists as two rotamers in chloroform at room temperature in a ratio of 0.56:0.44.

**Major rotamer:** <sup>1</sup>H NMR (500 MHz, CDCl<sub>3</sub>) δ 8.27 (d, *J* = 8.0 Hz, 2H), 7.58 (d, *J* = 8.6 Hz, 2H), 5.61 (dd, *J* = 12.5, 5.9 Hz, 1H), 5.37 (dt, *J* = 11.0, 6.6 Hz, 1H), 3.83 (d, *J* = 6.6 Hz, 2H), 3.08 (s, 3H), 1.85 (q, *J* = 7.4 Hz, 2H), 1.33 (q, *J* = 7.4 Hz, 2H), 0.84 (t, *J* = 7.4 Hz, 3H).

**Minor rotamer:** <sup>1</sup>H NMR (500 MHz, CDCl<sub>3</sub>) δ 8.27 (d, *J* = 8.0 Hz, 2H), 7.58 (d, *J* = 8.6 Hz, 2H), 5.72 (q, *J* = 8.3 Hz, 1H), 5.47 (dd, *J* = 10.0, 7.5 Hz, 1H), 4.23 (d, *J* = 7.1 Hz, 2H), 2.87 (s, 3H), 2.14 (t, *J* = 7.4 Hz, 2H), 1.44 (q, *J* = 7.4 Hz, 2H), 0.94 (t, *J* = 7.4 Hz, 3H).

Carbon NMR of the mixture is not reported since it was not possible to assign peaks to the major and minor components with confidence.

**HRMS analysis (ESI):** calculated for [M+H]<sup>+</sup>: C<sub>14</sub>H<sub>20</sub>N<sub>2</sub>O<sub>3</sub>: 263.1396; Found: 263.1406

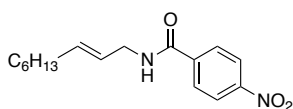

**1q**, (*E*)-4-nitro-*N*-(non-2-en-1-yl)benzamide

R<sub>f</sub>: 0.53 (40% EtOAc/Hex)

<sup>1</sup>H NMR (500 MHz, CDCl<sub>3</sub>) δ 8.30 (d, *J* = 8.8 Hz, 2H), 7.95 (d, *J* = 8.8 Hz, 2H), 6.15 (s, 1H), 5.78-5.71 (m, 1H), 5.60 – 5.51 (m, 1H), 4.06 (t, *J* = 6.6 Hz, 2H), 2.06 (q, *J* = 8.1, 7.5 Hz, 2H), 1.38 (q, *J* = 7.2, 6.7 Hz, 2H), 1.35 – 1.24 (m, 6H), 0.89 (t, *J* = 7.4 Hz, 3H)

<sup>13</sup>C NMR (126 MHz, CDCl<sub>3</sub>) δ 165.1, 149.6, 140.2, 135.3, 128.1, 124.7, 123.9, 42.4, 32.3, 31.7, 29.0, 28.9, 22.6, 14.1.

**HRMS analysis (ESI):** calculated for [M+H]<sup>+</sup>: C<sub>16</sub>H<sub>23</sub>N<sub>2</sub>O<sub>3</sub>: 291.1709; Found: 291.1706.

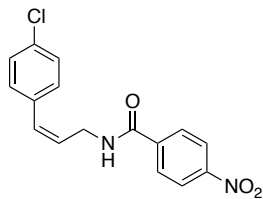

**1t**, (*Z*)-*N*-(3-(4-chlorophenyl)allyl)-4-nitrobenzamide

R<sub>f</sub>: 0.25 (30% EtOAC/Hex)

**<sup>1</sup>H NMR (500 MHz, CDCl<sub>3</sub>)** δ 8.29 (d, *J* = 8.8 Hz, 2H), 7.90 (d, *J* = 8.7 Hz, 2H), 7.34 (d, *J* = 8.5 Hz, 2H), 7.21 (d, *J* = 8.4 Hz, 2H), 6.62 (d, *J* = 11.5 Hz, 1H), 6.25 (s, 1H), 5.78 (dt, *J* = 11.5, 6.7 Hz, 1H), 4.36 (ddd, *J* = 7.0, 5.5, 1.9 Hz, 2H).

**<sup>13</sup>C NMR (126 MHz, CDCl<sub>3</sub>)** δ 165.3, 149.7, 139.8, 134.4, 133.4, 131.3, 130.0, 128.7, 128.1, 127.6, 123.9, 38.6.

**HRMS analysis (ESI):** calculated for [M+H]<sup>+</sup>: C<sub>16</sub>H<sub>14</sub>ClN<sub>2</sub>O<sub>3</sub>: 317.0693; Found: 317.0693.

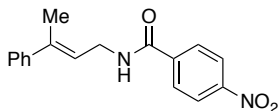

**1x**, (*E*)-4-nitro-*N*-(3-phenylbut-2-en-1-yl)benzamide

R<sub>f</sub>: 0.43 (40% EtOAC/Hex)

**<sup>1</sup>H NMR (500 MHz, CDCl<sub>3</sub>)** δ 8.31 (d, *J* = 8.7 Hz, 2H), 7.96 (d, *J* = 8.8 Hz, 2H), 7.46 – 7.40 (m, 2H), 7.39 – 7.32 (m, 2H), 7.32 – 7.28 (m, 1H), 6.22 (s, 1H), 5.88 (td, *J* = 7.1, 1.5 Hz, 1H), 4.31 (t, *J* = 6.3 Hz, 2H), 2.18 (s, 3H).

**<sup>13</sup>C NMR (126 MHz, CDCl<sub>3</sub>)** δ 165.4, 149.6, 142.5, 140.1, 139.7, 128.4, 128.1, 127.6, 125.8, 123.9, 122.3, 38.9, 16.2.

**HRMS analysis (ESI):** calculated for [M+H]<sup>+</sup>: C<sub>17</sub>H<sub>17</sub>N<sub>2</sub>O<sub>3</sub>: 297.1239; Found: 297.1238

**f. HPLC traces:**

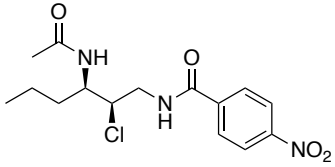

**2a**

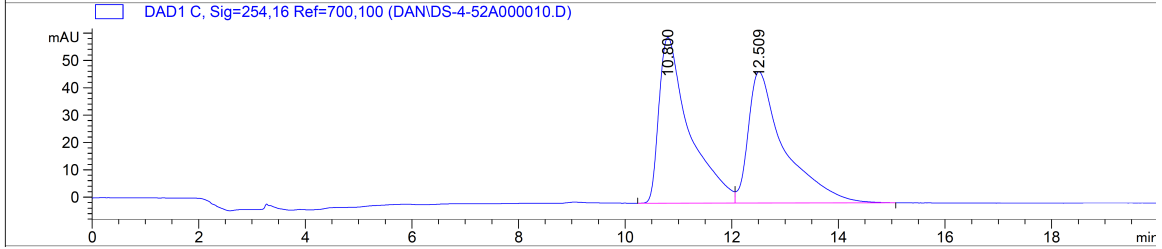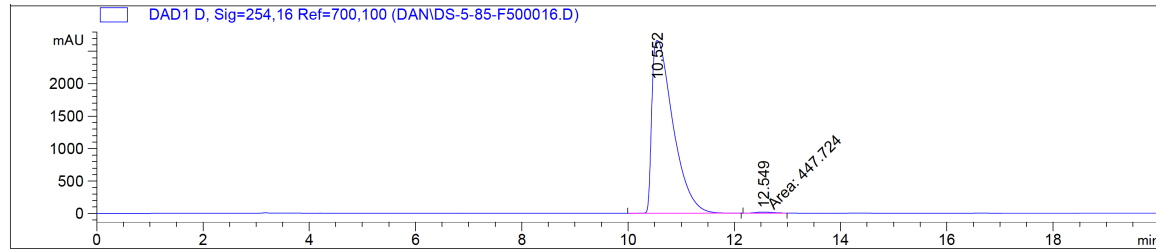

Signal 4: DAD1 D, Sig=254,16 Ref=700,100

| Peak # | RetTime [min] | Type | Width [min] | Area [mAU*s] | Height [mAU] | Area %  |
|--------|---------------|------|-------------|--------------|--------------|---------|
| 1      | 10.552        | BB   | 0.4176      | 7.34487e4    | 2664.31372   | 99.3941 |
| 2      | 12.549        | MM   | 0.4103      | 447.72388    | 18.18661     | 0.6059  |

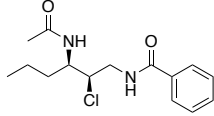

2b

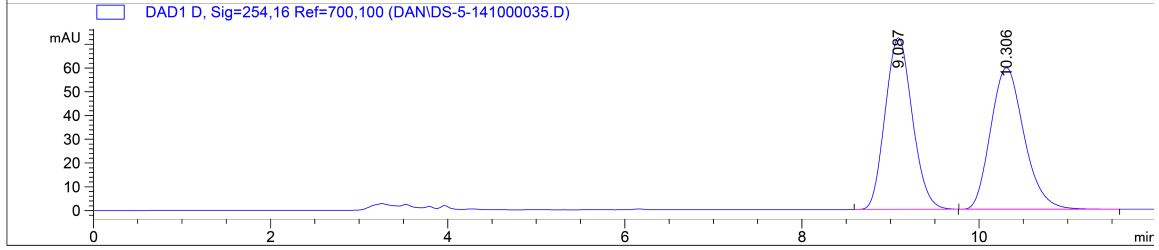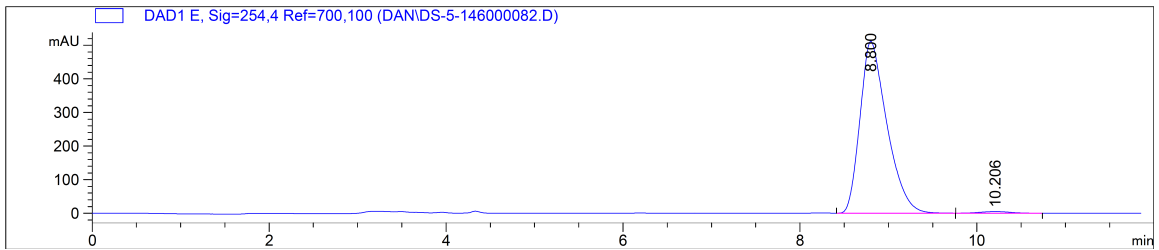

Signal 5: DAD1 E, Sig=254,4 Ref=700,100

| Peak # | RetTime [min] | Type | Width [min] | Area [mAU*s] | Height [mAU] | Area %  |
|--------|---------------|------|-------------|--------------|--------------|---------|
| 1      | 8.800         | BB   | 0.3100      | 1.07800e4    | 511.33914    | 98.9854 |
| 2      | 10.206        | BB   | 0.3232      | 110.49004    | 4.71902      | 1.0146  |

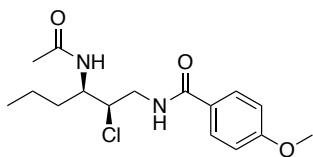

2c

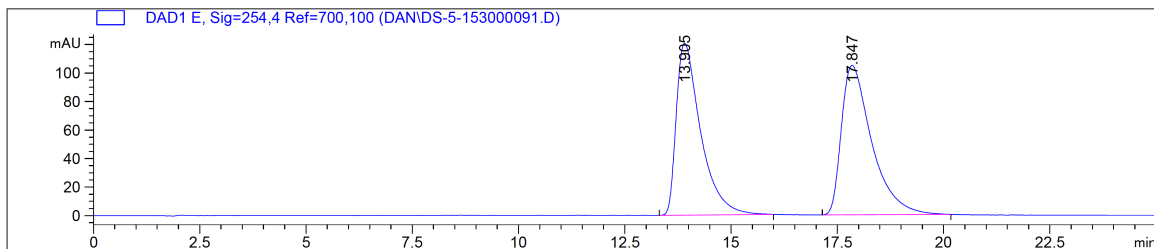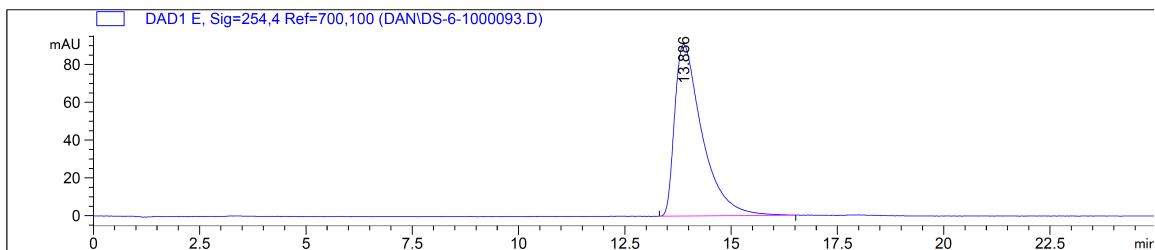



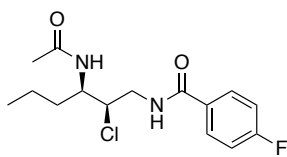

2d

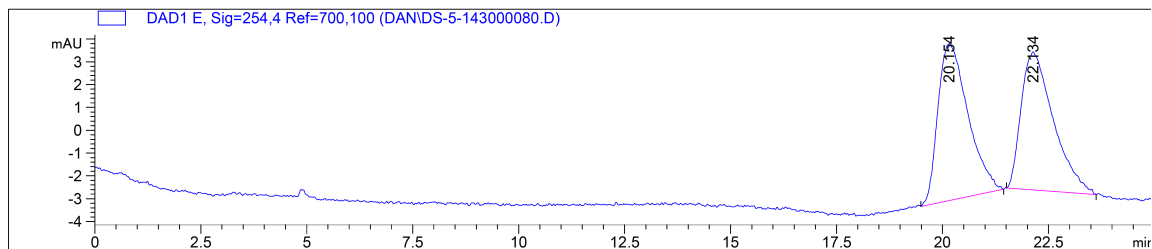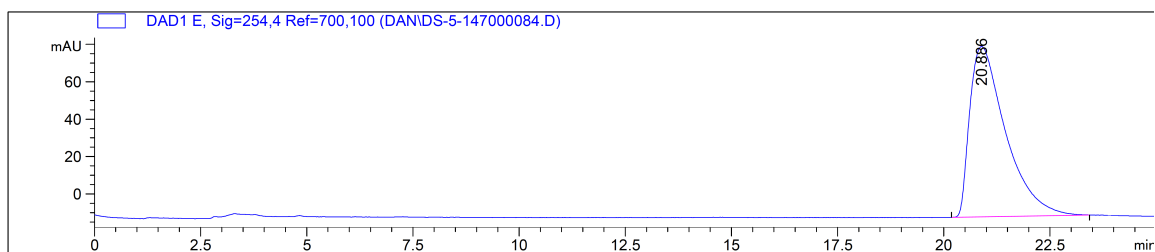

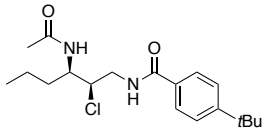

2e

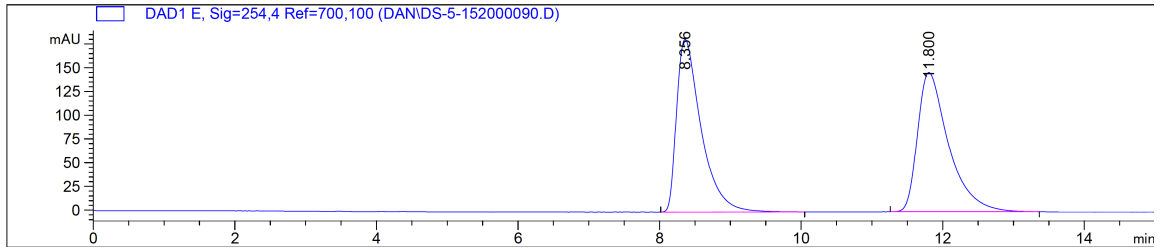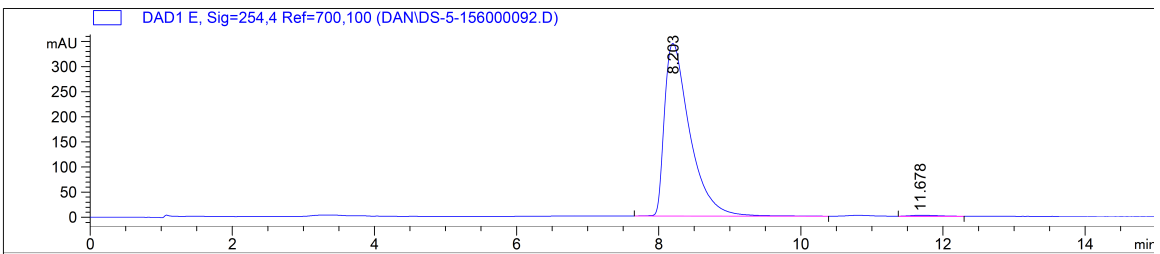

Signal 5: DAD1 E, Sig=254,4 Ref=700,100

| Peak # | RetTime [min] | Type | Width [min] | Area [mAU*s] | Height [mAU] | Area %  |
|--------|---------------|------|-------------|--------------|--------------|---------|
| 1      | 8.203         | BB   | 0.3696      | 8463.86426   | 343.38287    | 99.4164 |
| 2      | 11.678        | BB   | 0.3346      | 49.68662     | 1.78556      | 0.5836  |

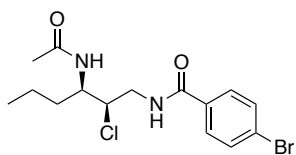

2f

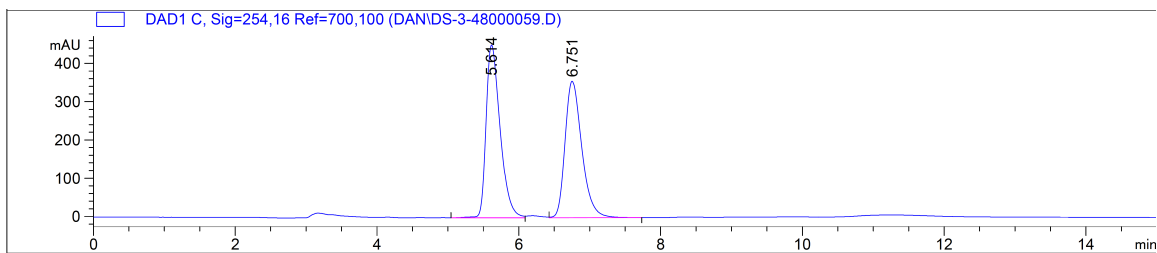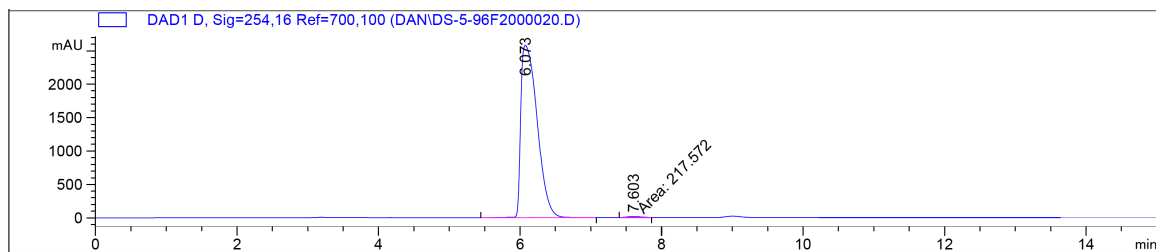

Signal 4: DAD1 D, Sig=254,16 Ref=700,100

| Peak # | RetTime [min] | Type | Width [min] | Area [mAU*s] | Height [mAU] | Area %  |
|--------|---------------|------|-------------|--------------|--------------|---------|
| 1      | 6.073         | BB   | 0.2587      | 4.12460e4    | 2578.03955   | 99.4753 |
| 2      | 7.603         | MM   | 0.2260      | 217.57217    | 16.04398     | 0.5247  |

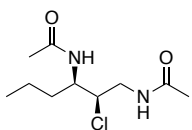

2g

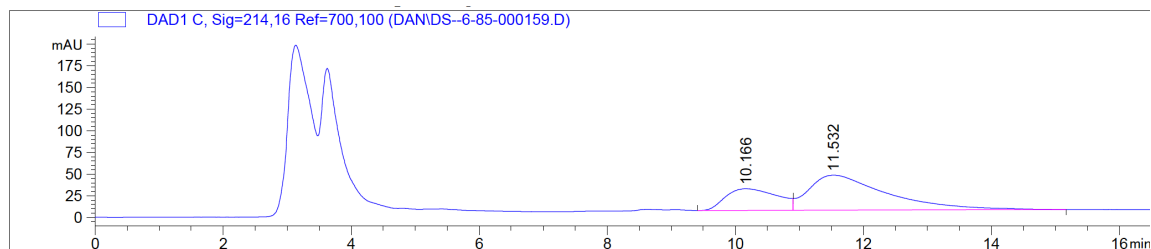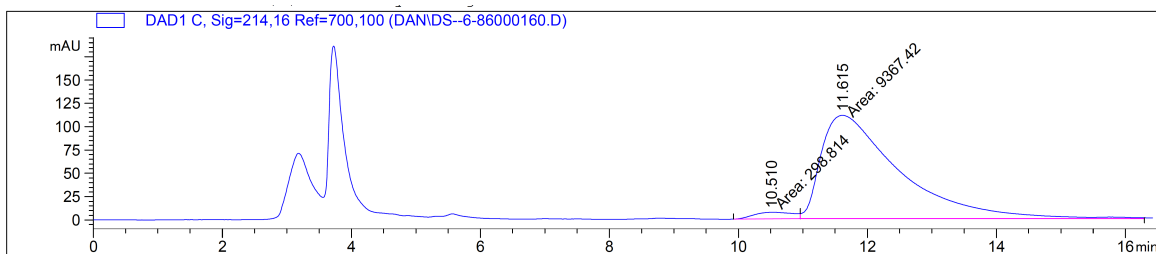

Signal 1: DAD1 C, Sig=214,16 Ref=700,100

| Peak # | RetTime [min] | Type | Width [min] | Area [mAU*s] | Height [mAU] | Area %  |
|--------|---------------|------|-------------|--------------|--------------|---------|
| 1      | 10.510        | MM   | 0.7057      | 298.81448    | 7.05724      | 3.0913  |
| 2      | 11.615        | MM   | 1.4080      | 9367.41797   | 110.88100    | 96.9087 |

Totals : 9666.23245 117.93824

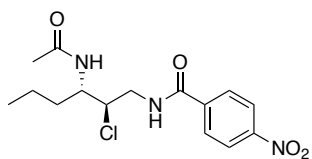

2h

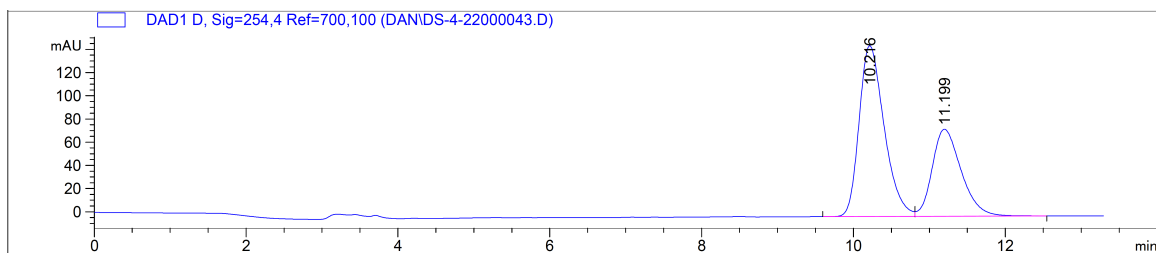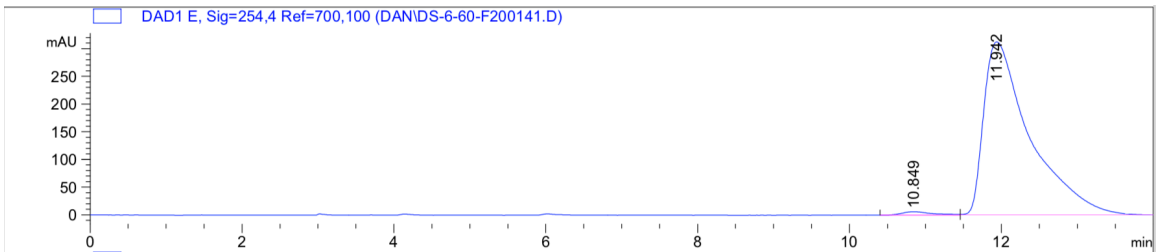

Signal 5: DAD1 E, Sig=254,4 Ref=700,100

| Peak # | RetTime [min] | Type | Width [min] | Area [mAU*s] | Height [mAU] | Area %  |
|--------|---------------|------|-------------|--------------|--------------|---------|
| 1      | 10.849        | BV   | 0.3999      | 180.29829    | 6.26180      | 1.3404  |
| 2      | 11.942        | VB   | 0.6172      | 1.32704e4    | 312.66104    | 98.6596 |

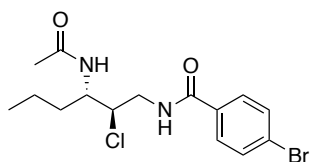

2i

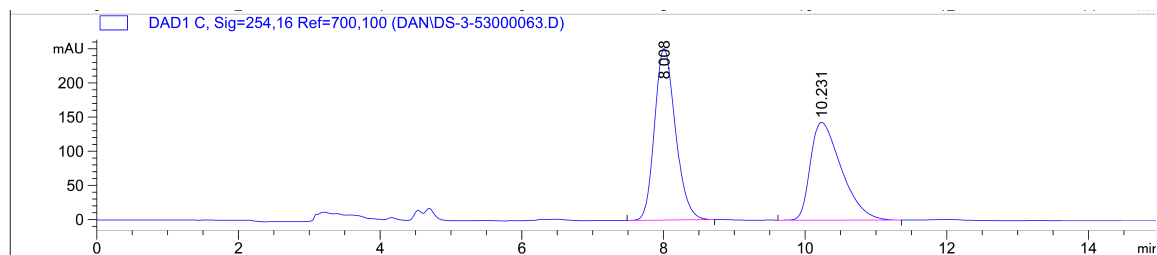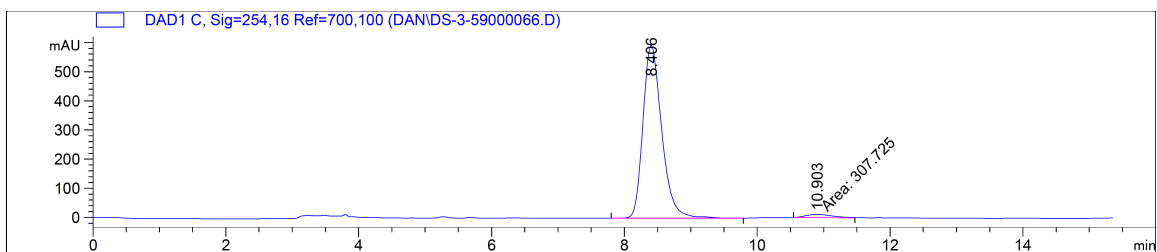

Signal 3: DAD1 C, Sig=254,16 Ref=700,100

| Peak # | RetTime [min] | Type | Width [min] | Area [mAU*s] | Height [mAU] | Area %  |
|--------|---------------|------|-------------|--------------|--------------|---------|
| 1      | 8.406         | BB   | 0.3031      | 1.16218e4    | 591.71783    | 97.4205 |
| 2      | 10.903        | MM   | 0.4577      | 307.72479    | 11.20608     | 2.5795  |

Totals : 1.19295e4 602.92391

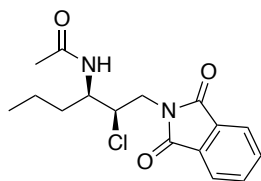

2j

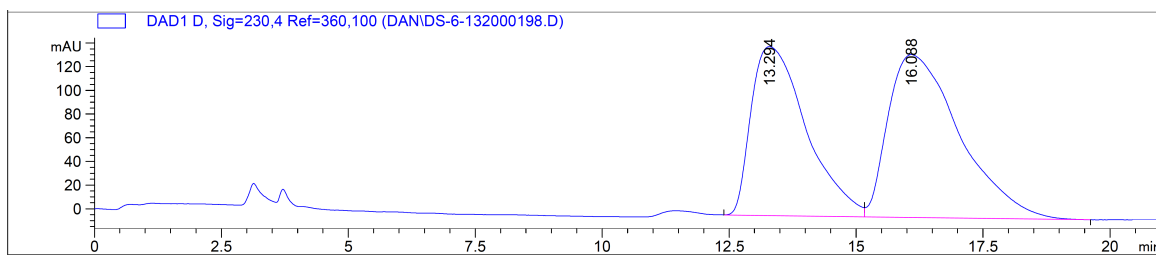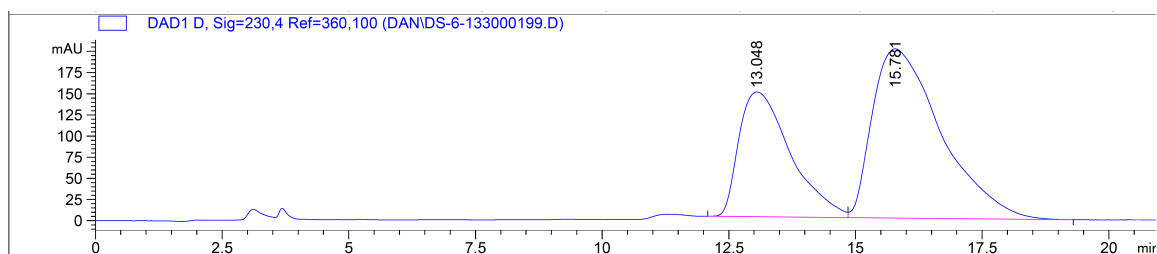

Signal 4: DAD1 D, Sig=230,4 Ref=360,100

| Peak # | RetTime [min] | Type | Width [min] | Area [mAU*s] | Height [mAU] | Area %  |
|--------|---------------|------|-------------|--------------|--------------|---------|
| 1      | 13.048        | BV   | 1.0481      | 1.04244e4    | 147.21996    | 35.6476 |
| 2      | 15.781        | VB   | 1.3527      | 1.88186e4    | 199.83273    | 64.3524 |

Totals : 2.92430e4 347.05269

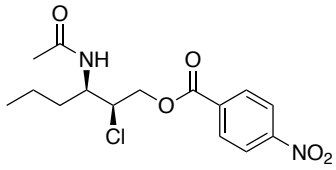

2k

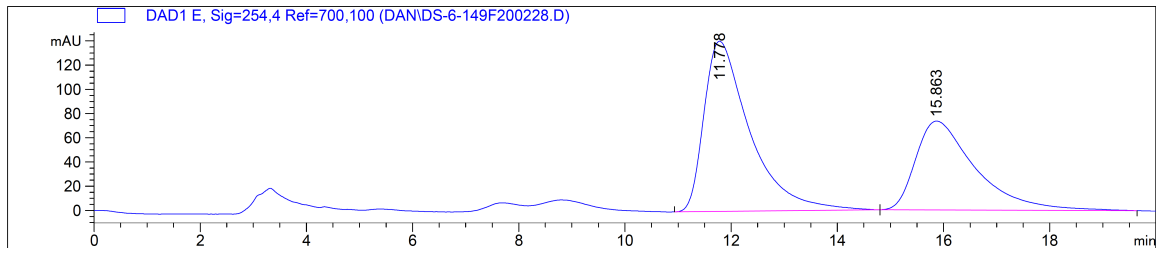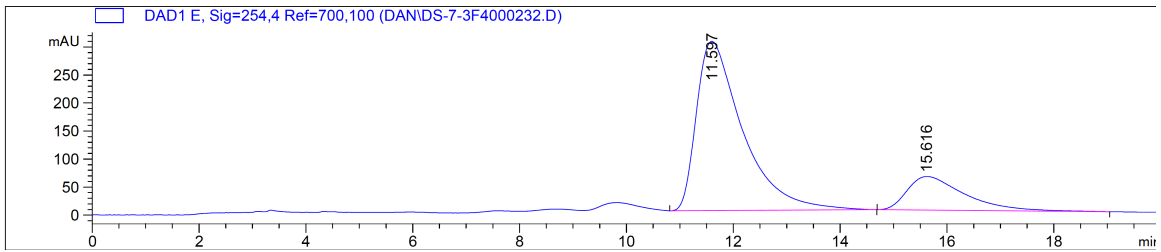

Signal 5: DAD1 E, Sig=254,4 Ref=700,100

| Peak # | RetTime [min] | Type | Width [min] | Area [mAU*s] | Height [mAU] | Area %  |
|--------|---------------|------|-------------|--------------|--------------|---------|
| 1      | 11.597        | BB   | 0.8794      | 1.81429e4    | 301.76712    | 80.1808 |
| 2      | 15.616        | BB   | 0.9744      | 4484.58203   | 60.11290     | 19.8192 |



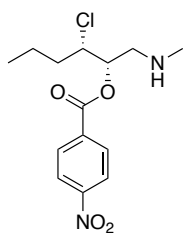

21''

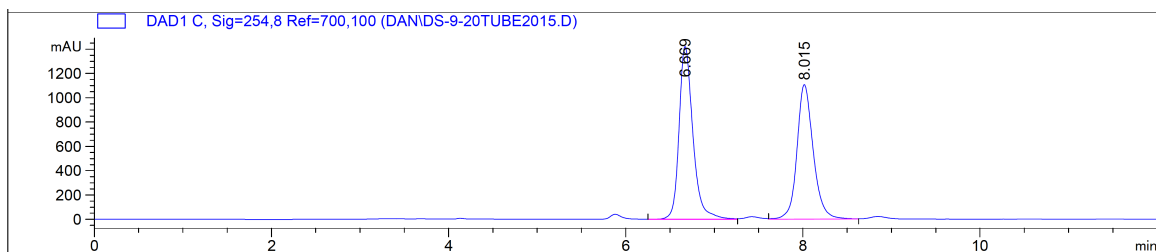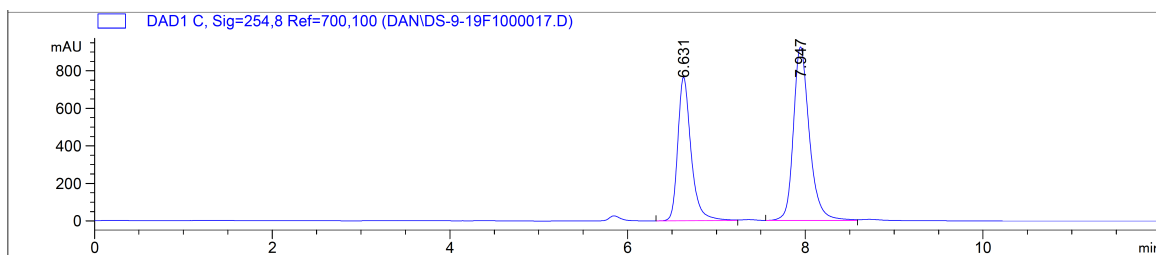

Signal 3: DAD1 C, Sig=254,8 Ref=700,100

| Peak # | RetTime [min] | Type | Width [min] | Area [mAU*s] | Height [mAU] | Area %  |
|--------|---------------|------|-------------|--------------|--------------|---------|
| 1      | 6.631         | BV   | 0.1572      | 7959.15527   | 766.04663    | 40.7930 |
| 2      | 7.947         | BV   | 0.1897      | 1.15519e4    | 925.20074    | 59.2070 |

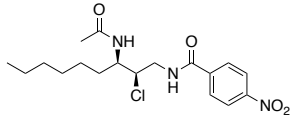

**2m**

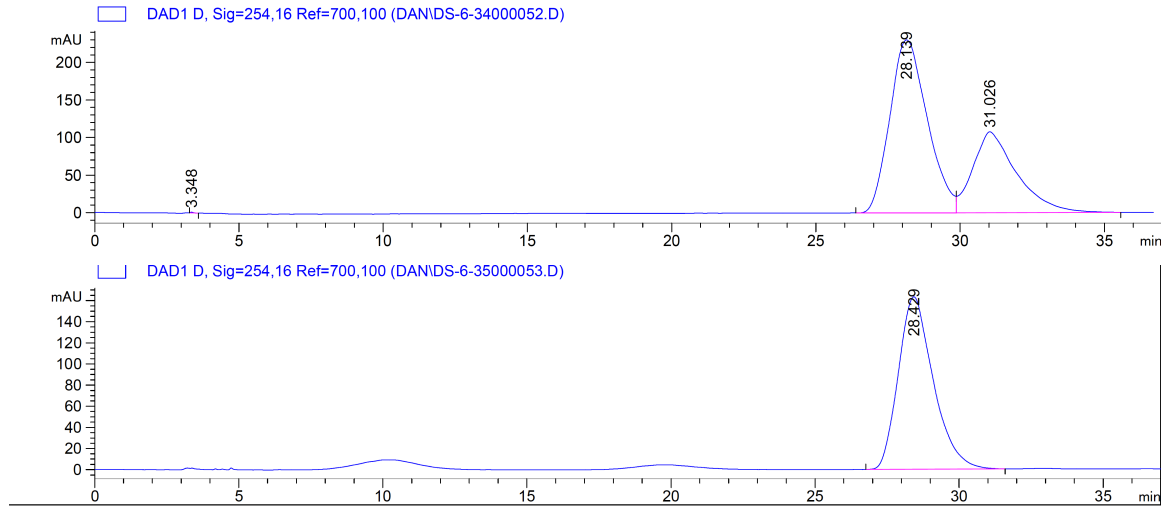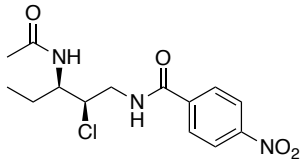

**2n**

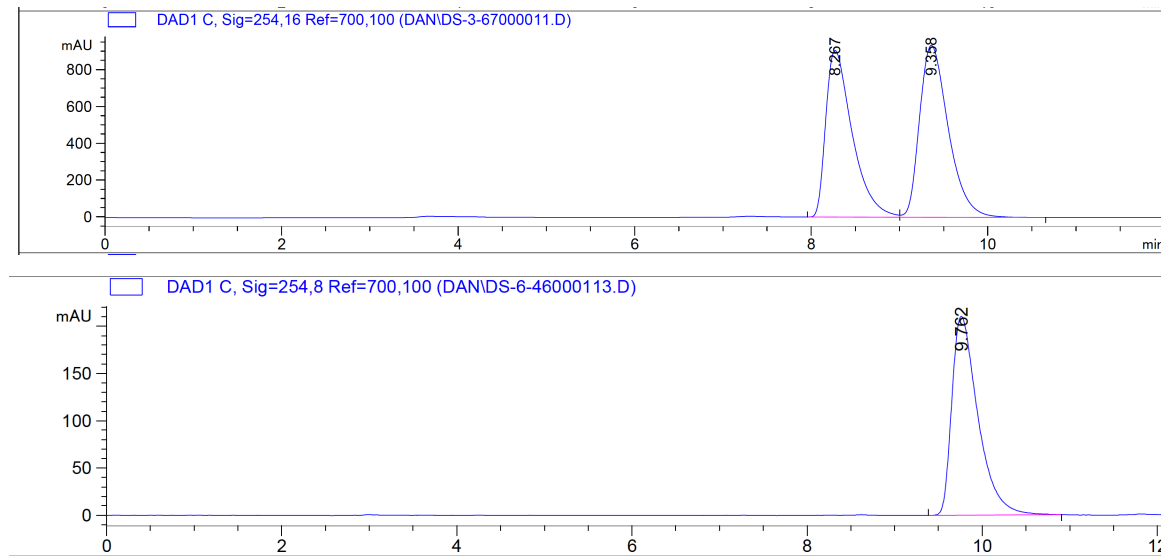

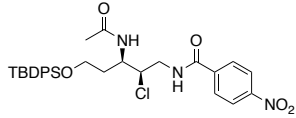

2o

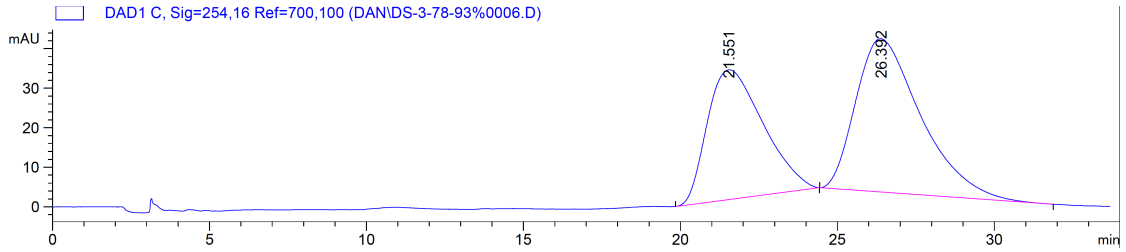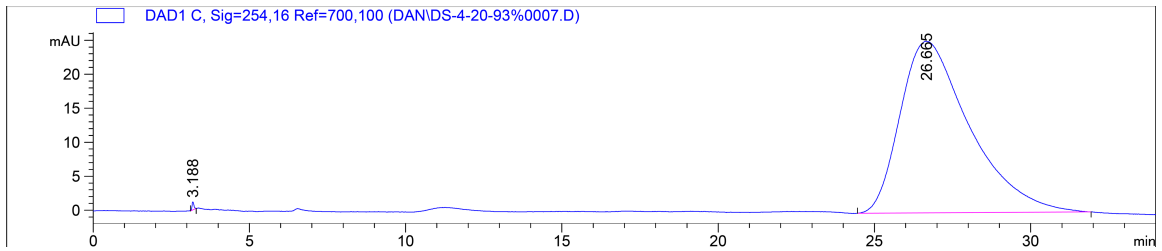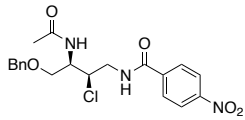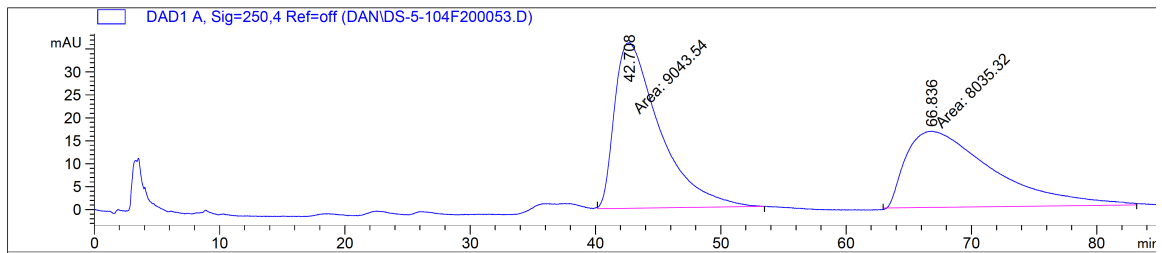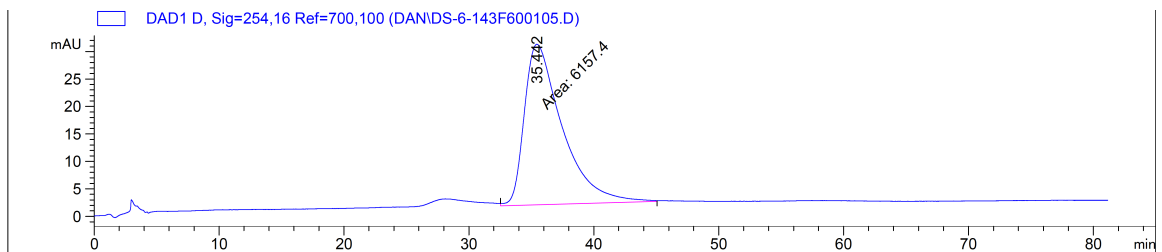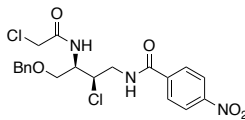

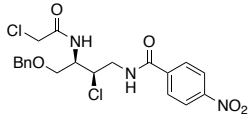

2p'

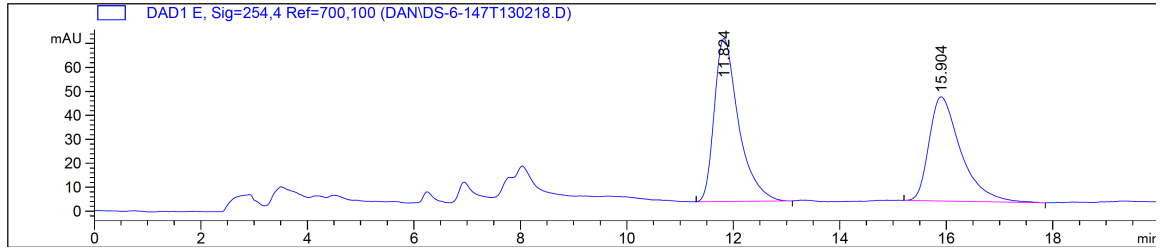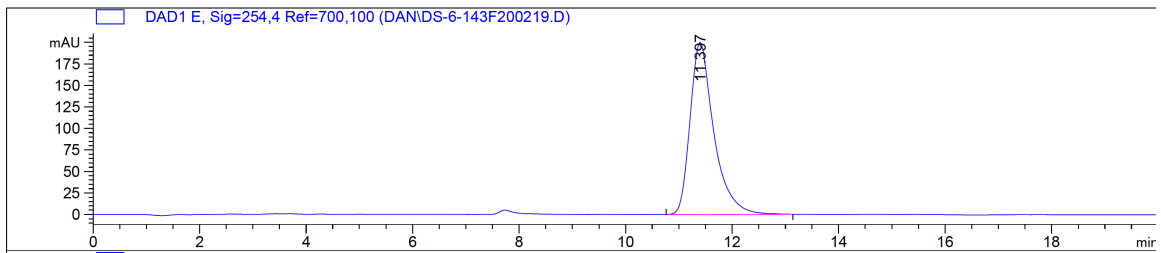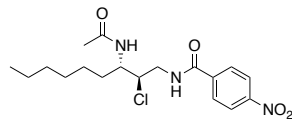

2q

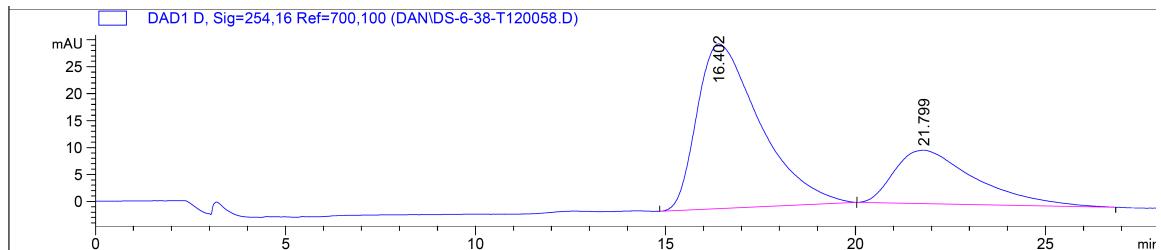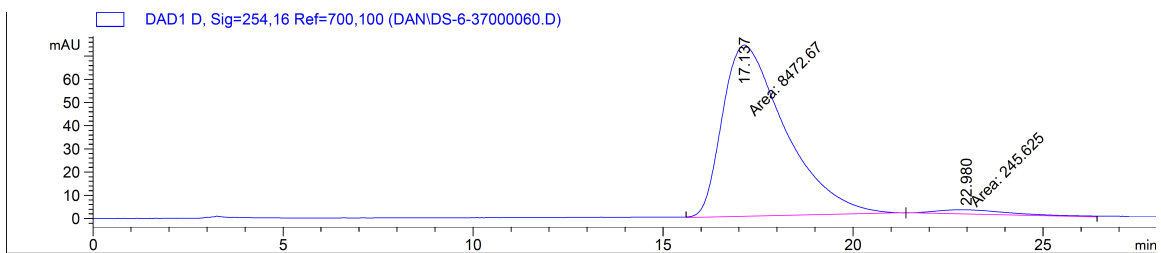

Signal 4: DAD1 D, Sig=254,16 Ref=700,100

| Peak # | RetTime [min] | Type | Width [min] | Area [mAU*s] | Height [mAU] | Area %  |
|--------|---------------|------|-------------|--------------|--------------|---------|
| 1      | 17.137        | MM   | 1.9136      | 8472.66602   | 73.79383     | 97.1827 |
| 2      | 22.980        | MM   | 2.2774      | 245.62465    | 1.79753      | 2.8173  |



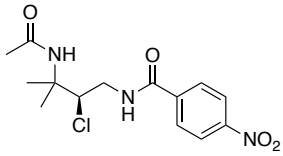

2r

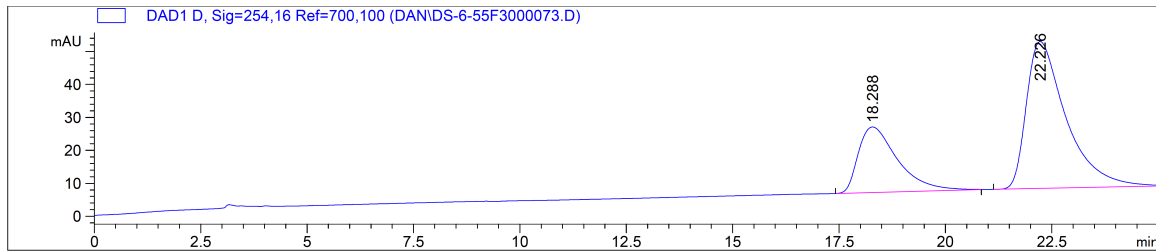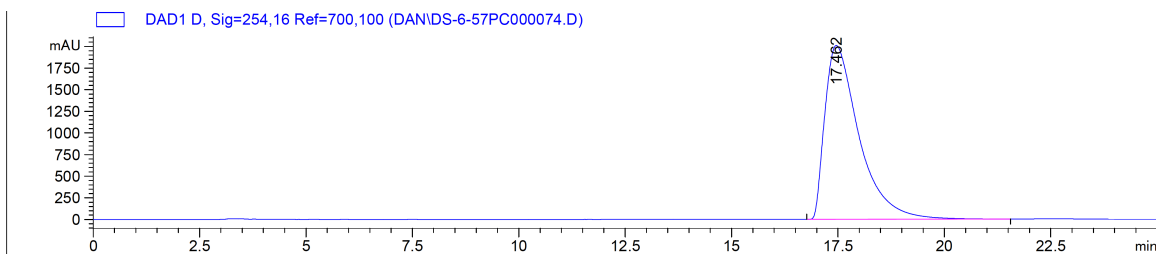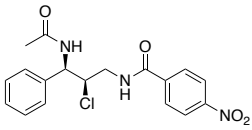

2s

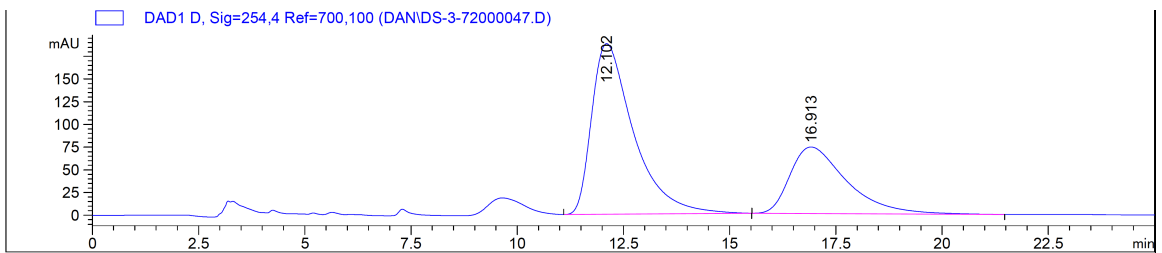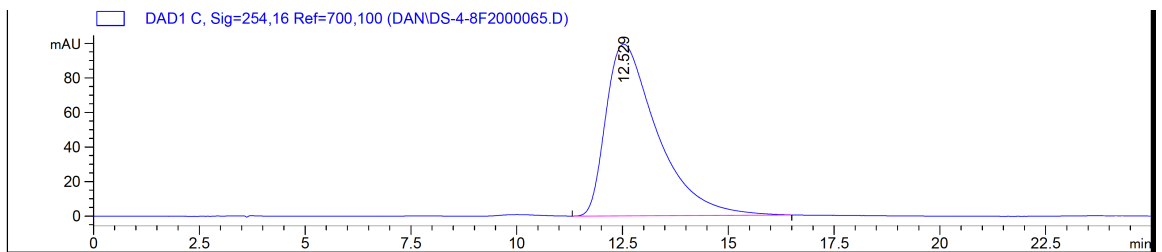

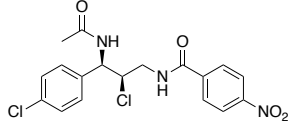

2t

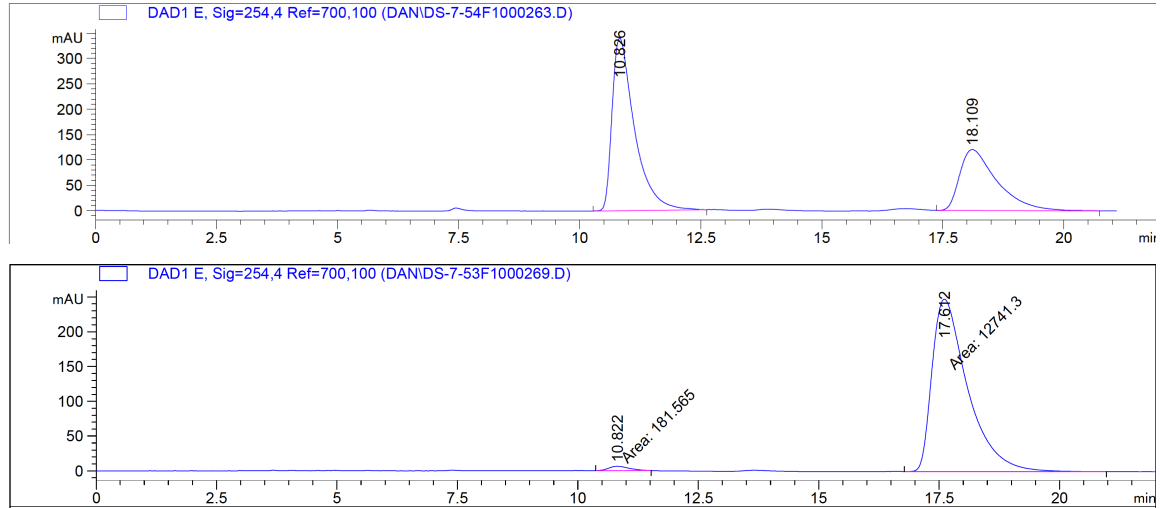

Signal 5: DAD1 E, Sig=254,4 Ref=700,100

| Peak # | RetTime [min] | Type | Width [min] | Area [mAU*s] | Height [mAU] | Area %  |
|--------|---------------|------|-------------|--------------|--------------|---------|
| 1      | 10.822        | MM   | 0.4891      | 181.56491    | 6.18745      | 1.4050  |
| 2      | 17.612        | MM   | 0.8567      | 1.27413e4    | 247.88031    | 98.5950 |

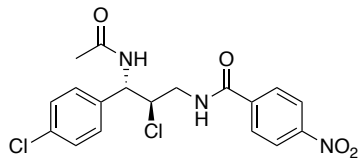

2t-D

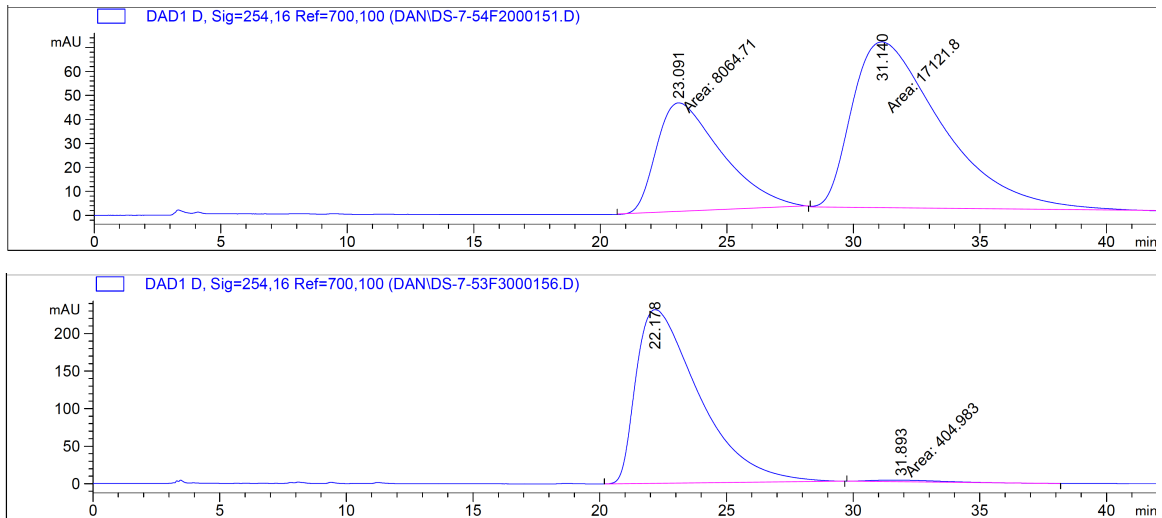

Signal 4: DAD1 D, Sig=254,16 Ref=700,100

| Peak # | RetTime [min] | Type | Width [min] | Area [mAU*s] | Height [mAU] | Area %  |
|--------|---------------|------|-------------|--------------|--------------|---------|
| 1      | 22.178        | BB   | 2.3715      | 4.00380e4    | 231.06677    | 98.9986 |
| 2      | 31.893        | MM   | 3.1338      | 404.98325    | 2.15385      | 1.0014  |

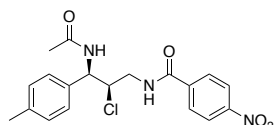

2u

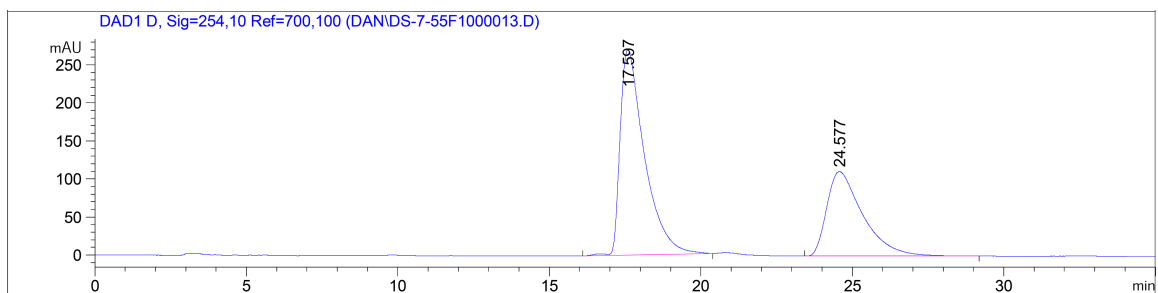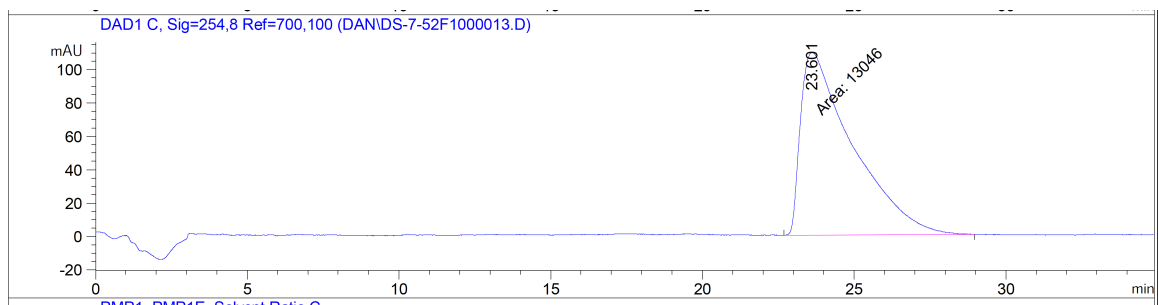



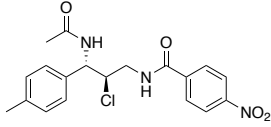

## 2u-D

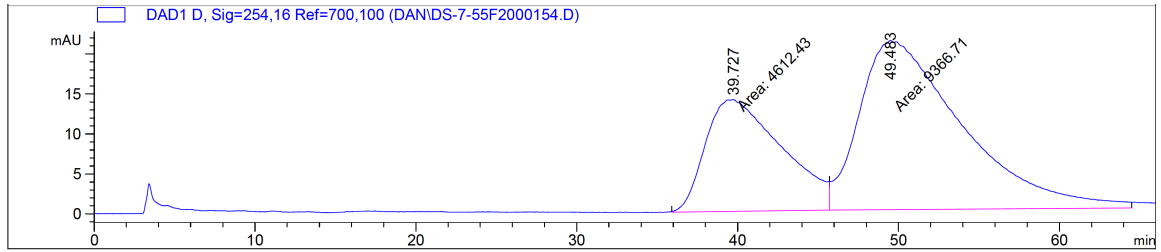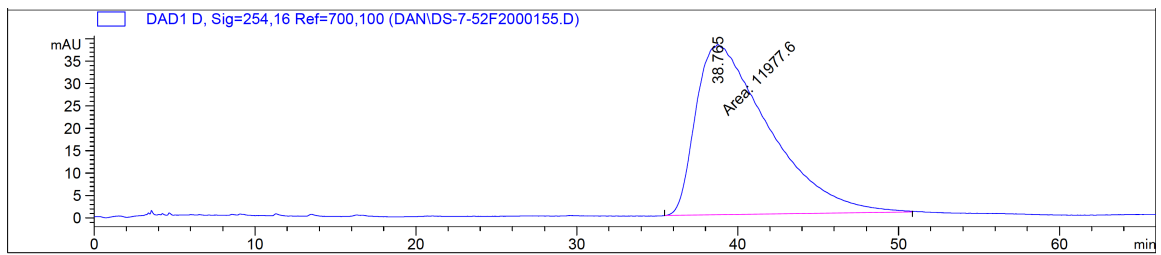

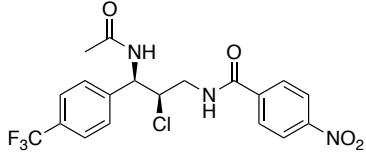

2v

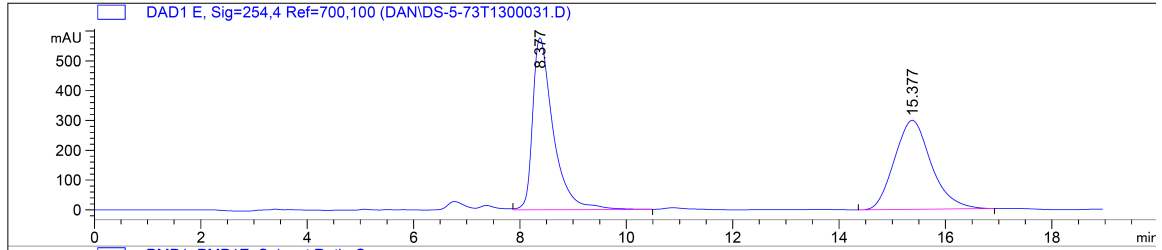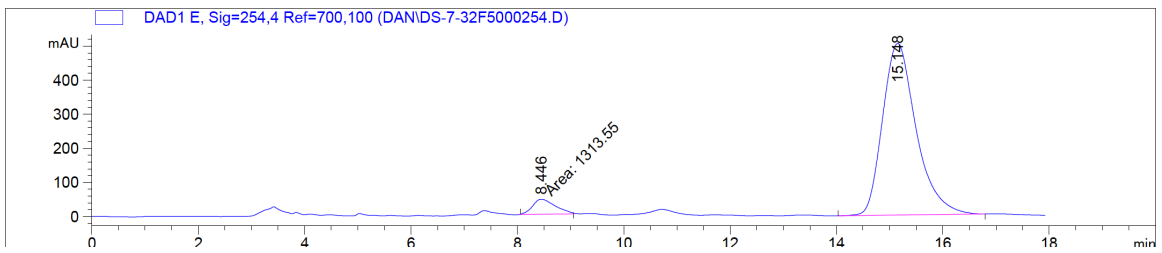

Signal 5: DAD1 E, Sig=254,4 Ref=700,100

| Peak # | RetTime [min] | Type | Width [min] | Area [mAU*s] | Height [mAU] | Area %  |
|--------|---------------|------|-------------|--------------|--------------|---------|
| 1      | 8.446         | MM   | 0.4936      | 1313.55164   | 44.34906     | 5.6139  |
| 2      | 15.148        | BB   | 0.6652      | 2.20845e4    | 504.02090    | 94.3861 |

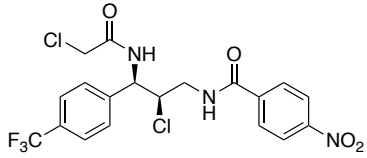

2v'

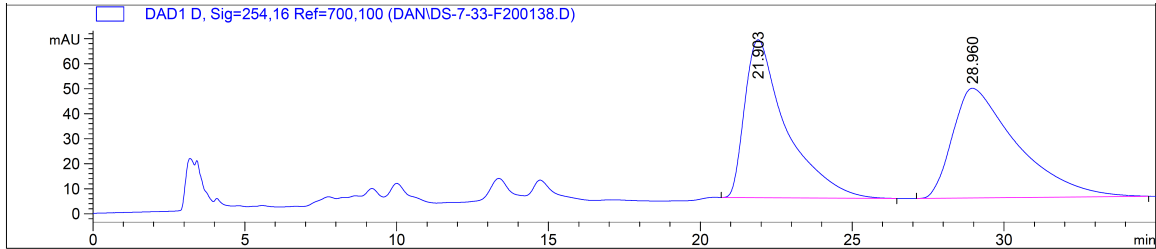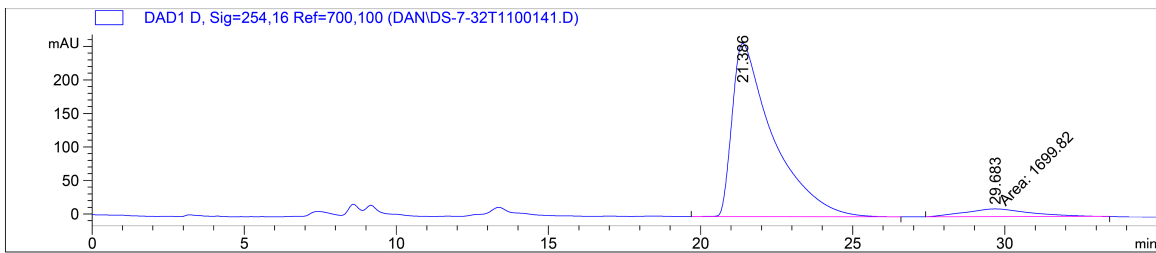

Signal 4: DAD1 D, Sig=254,16 Ref=700,100

| Peak # | RetTime [min] | Type | Width [min] | Area [mAU*s] | Height [mAU] | Area %  |
|--------|---------------|------|-------------|--------------|--------------|---------|
| 1      | 21.386        | BB   | 1.3222      | 2.41083e4    | 258.47577    | 93.4136 |
| 2      | 29.683        | MM   | 2.4475      | 1699.81824   | 11.57501     | 6.5864  |

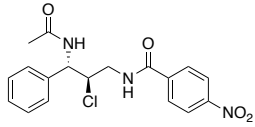

2w

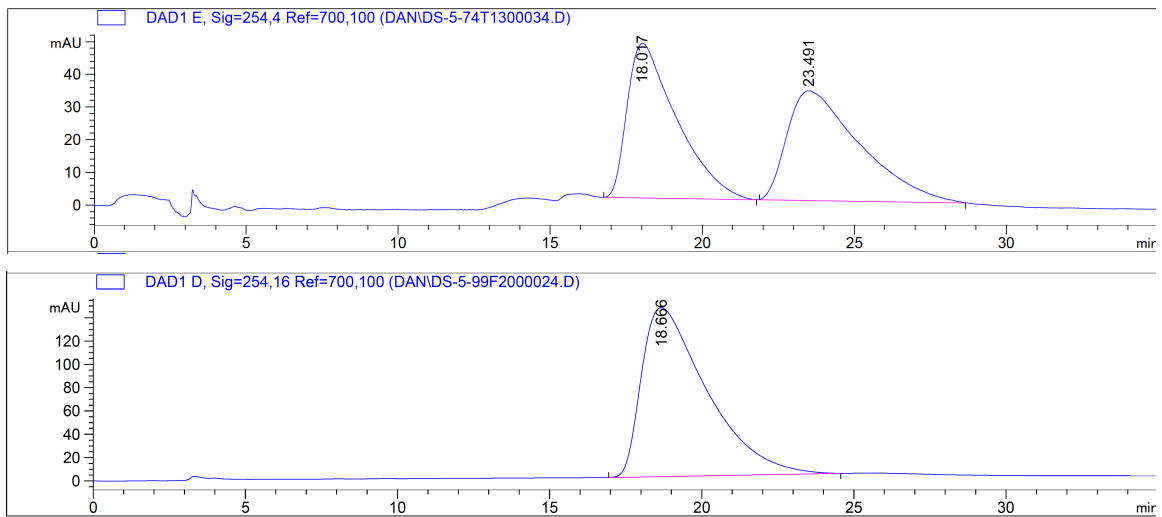

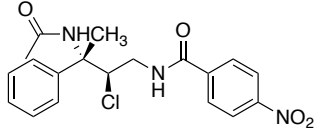

2x

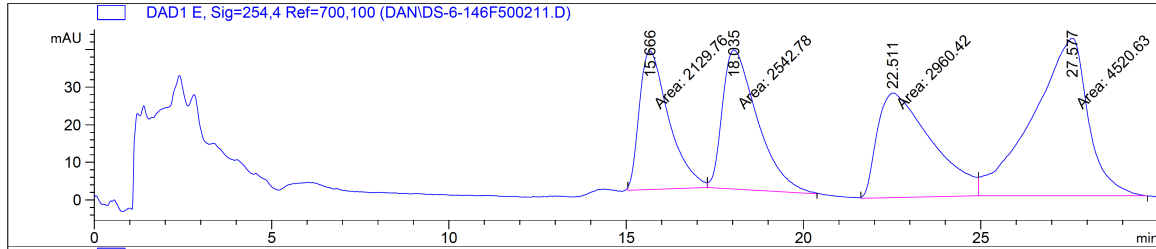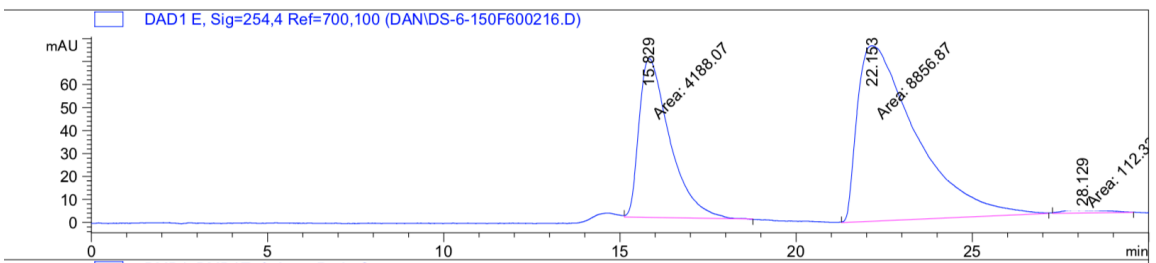

Signal 5: DAD1 E, Sig=254,4 Ref=700,100

| Peak # | RetTime [min] | Type | Width [min] | Area [mAU*s] | Height [mAU] | Area %  |
|--------|---------------|------|-------------|--------------|--------------|---------|
| 1      | 15.829        | MM   | 1.0107      | 4188.06689   | 69.06340     | 31.8309 |
| 2      | 22.153        | MM   | 1.9335      | 8856.86719   | 76.34757     | 67.3155 |
| 3      | 28.129        | MM   | 1.5342      | 112.32303    | 1.22023      | 0.8537  |

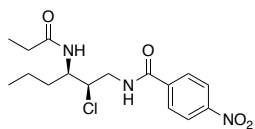

## 2aa

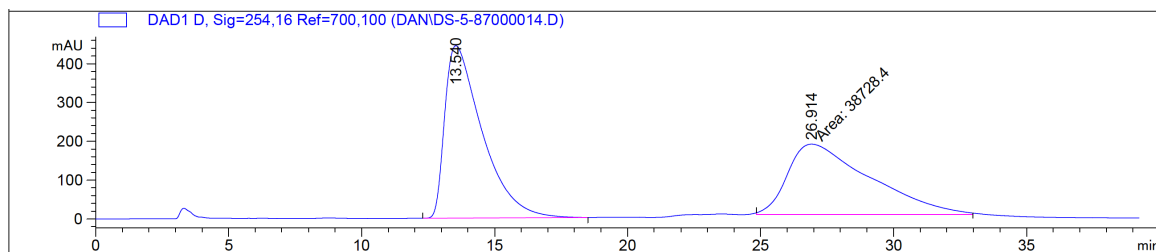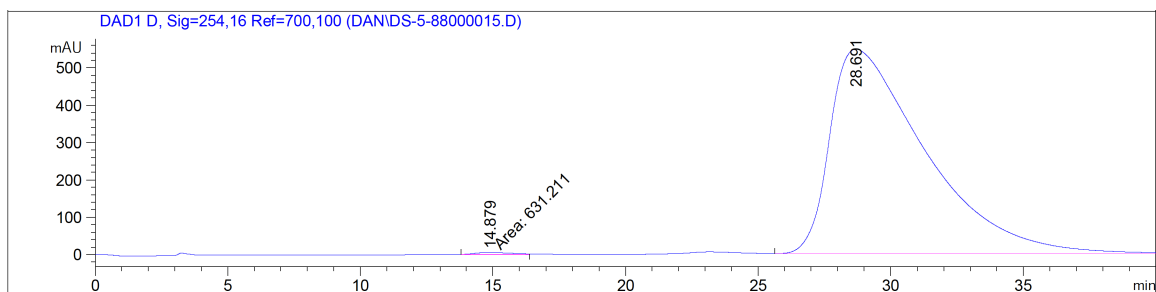

Signal 4: DAD1 D, Sig=254,16 Ref=700,100

| Peak # | RetTime [min] | Type | Width [min] | Area [mAU*s] | Height [mAU] | Area %  |
|--------|---------------|------|-------------|--------------|--------------|---------|
| 1      | 14.879        | MM   | 1.7033      | 631.21051    | 6.17631      | 0.4586  |
| 2      | 28.691        | BB   | 3.3370      | 1.36998e5    | 547.56433    | 99.5414 |

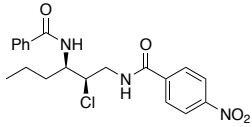

**2ab**

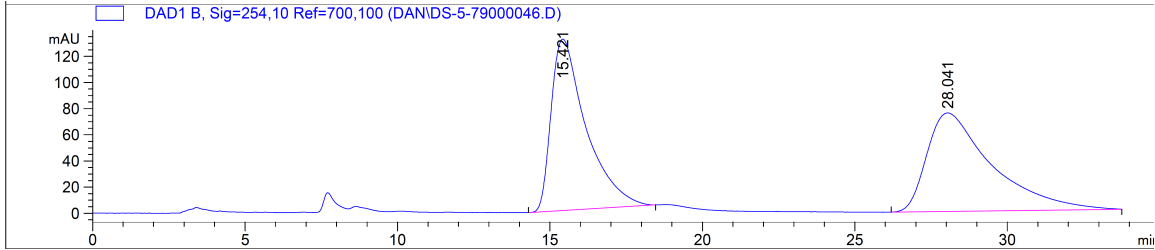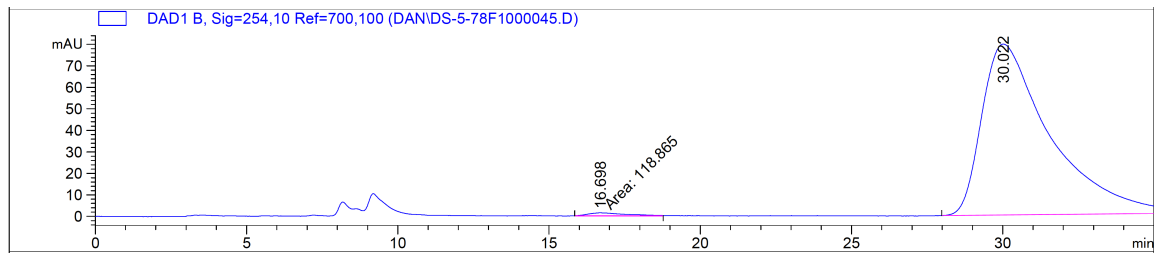

Signal 2: DAD1 B, Sig=254,10 Ref=700,100

| Peak # | RetTime [min] | Type | Width [min] | Area [mAU*s] | Height [mAU] | Area %  |
|--------|---------------|------|-------------|--------------|--------------|---------|
| 1      | 16.698        | MM   | 1.4209      | 118.86465    | 1.39422      | 0.9342  |
| 2      | 30.022        | BB   | 1.8681      | 1.26046e4    | 79.48485     | 99.0658 |

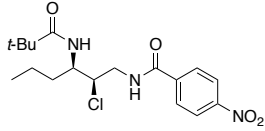

**2ac**

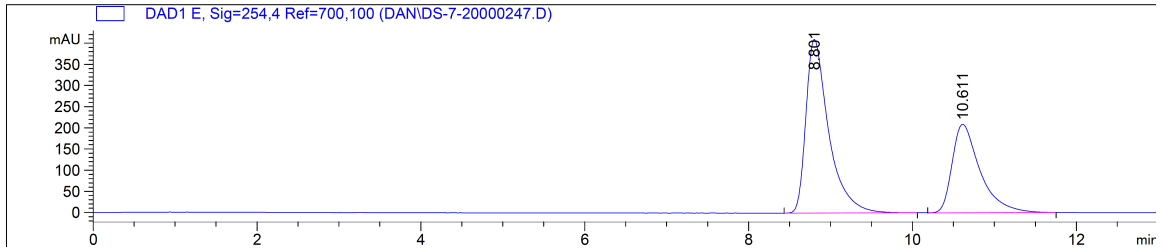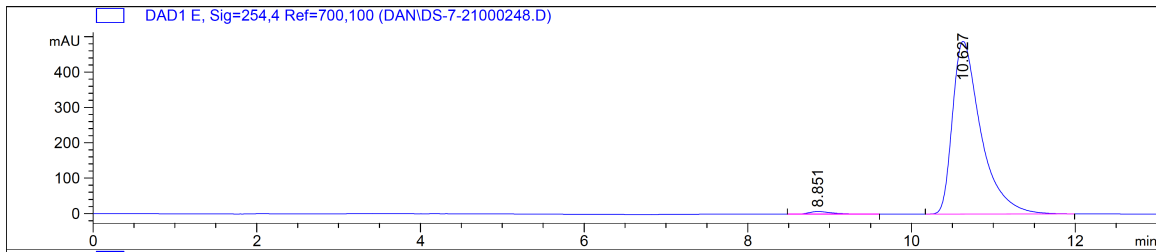

Signal 5: DAD1 E, Sig=254,4 Ref=700,100

| Peak # | RetTime [min] | Type | Width [min] | Area [mAU*s] | Height [mAU] | Area %  |
|--------|---------------|------|-------------|--------------|--------------|---------|
| 1      | 8.851         | BB   | 0.2829      | 146.71075    | 7.41419      | 1.2334  |
| 2      | 10.627        | BB   | 0.3605      | 1.17484e4    | 488.62601    | 98.7666 |



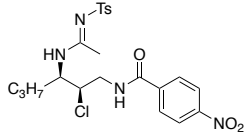

**3a**

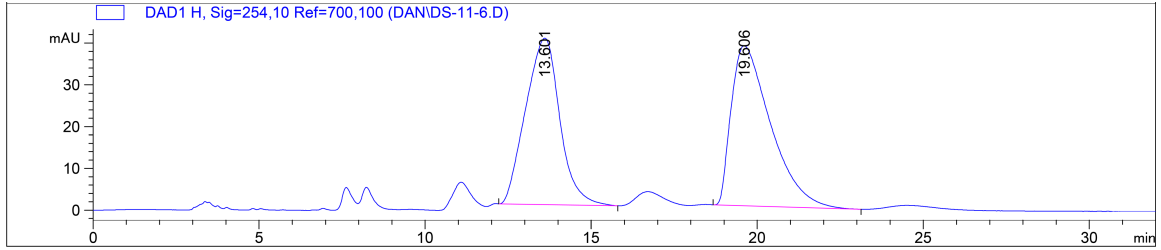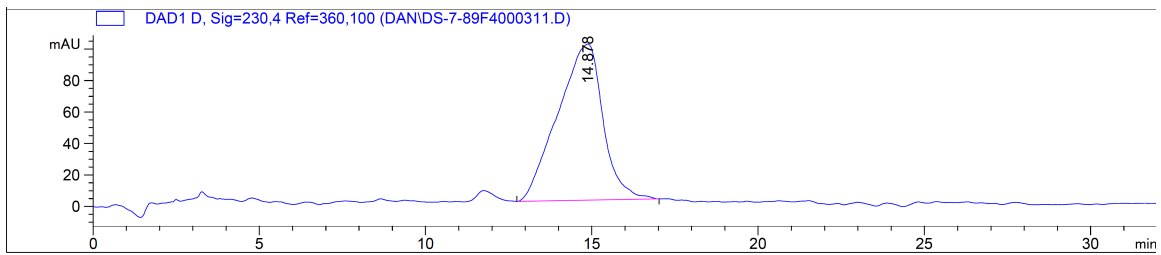

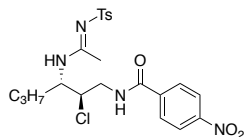

3h

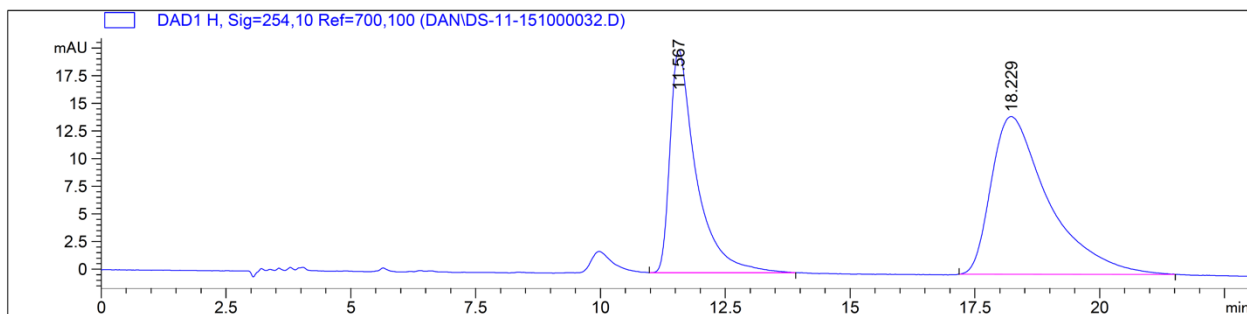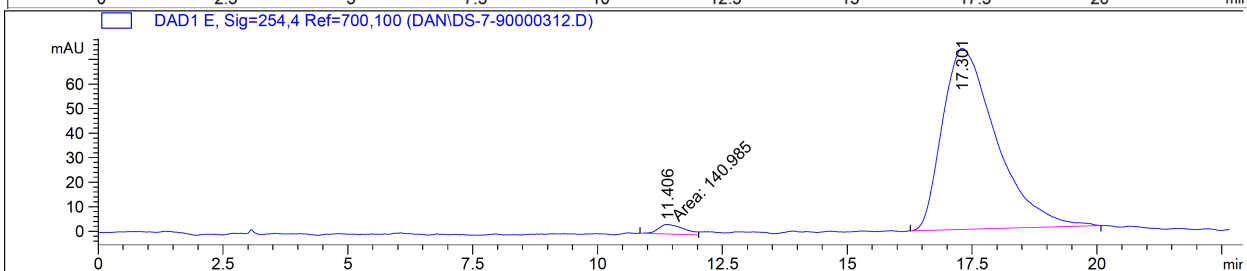

Signal 5: DAD1 E, Sig=254,4 Ref=700,100

| Peak # | RetTime [min] | Type | Width [min] | Area [mAU*s] | Height [mAU] | Area %  |
|--------|---------------|------|-------------|--------------|--------------|---------|
| 1      | 11.406        | MM   | 0.6049      | 140.98515    | 3.88441      | 2.4857  |
| 2      | 17.301        | BB   | 0.9759      | 5530.86084   | 73.84030     | 97.5143 |

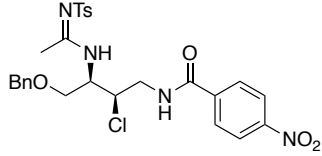

3p

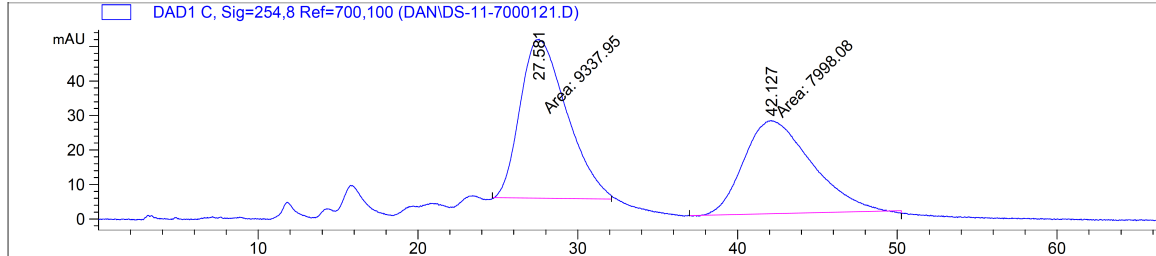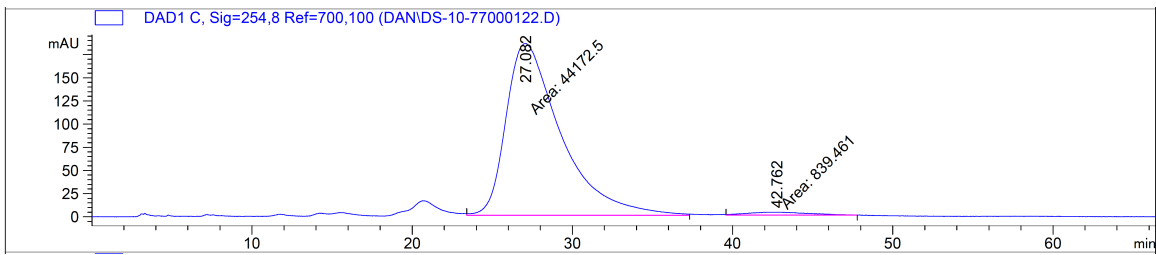

Signal 3: DAD1 C, Sig=254,8 Ref=700,100

| Peak # | RetTime [min] | Type | Width [min] | Area [mAU*s] | Height [mAU] | Area %  |
|--------|---------------|------|-------------|--------------|--------------|---------|
| 1      | 27.082        | MM   | 3.9727      | 4.41725e4    | 185.31581    | 98.1350 |
| 2      | 42.762        | MM   | 4.4539      | 839.46094    | 3.14126      | 1.8650  |

Totals : 4.50119e4 188.45707

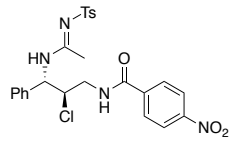

3s

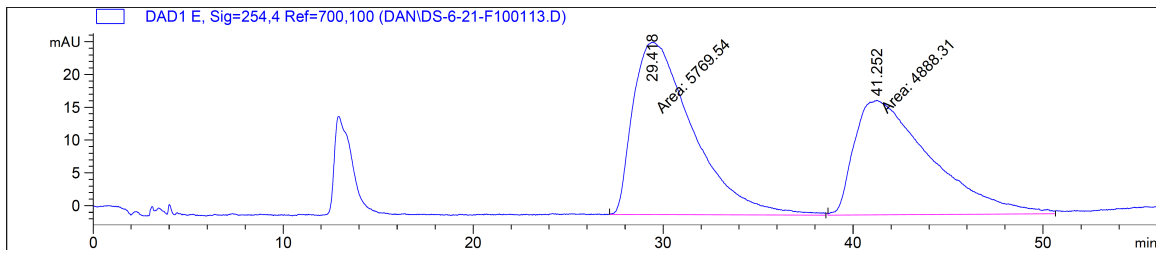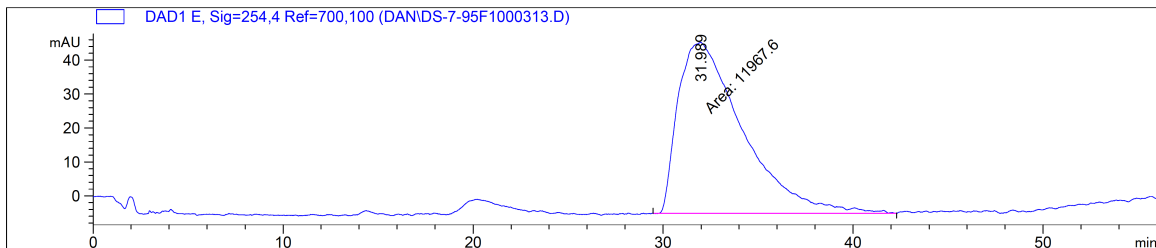

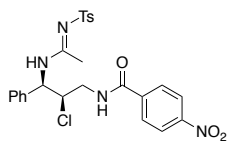

### 3s-diastereomer

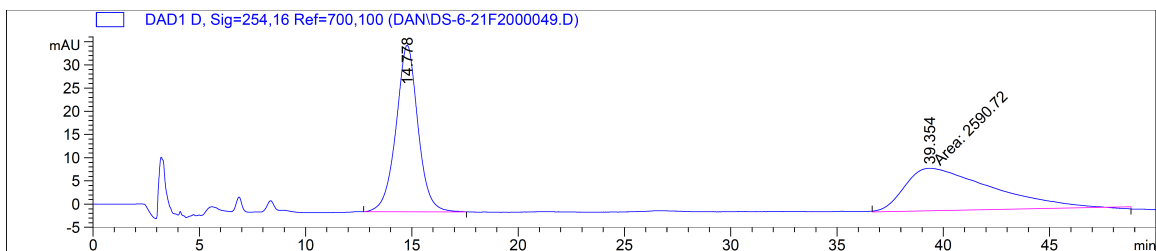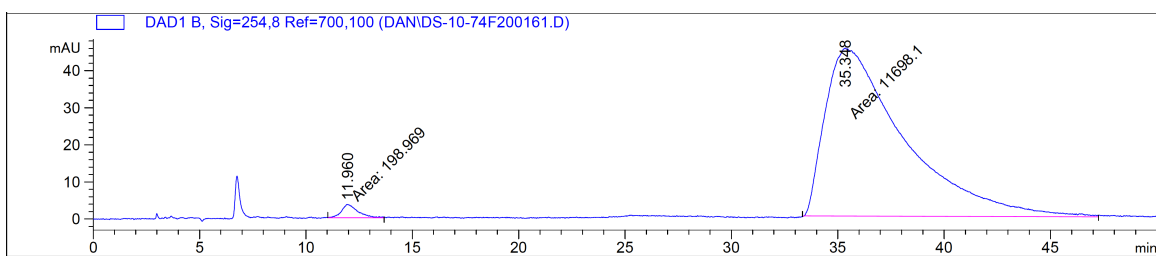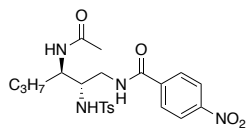

### 6a

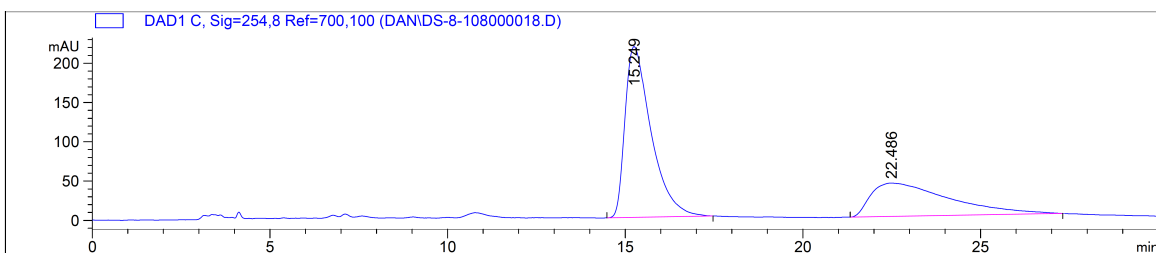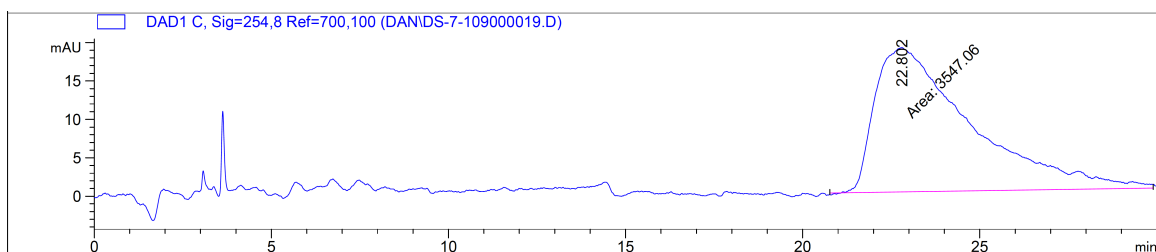

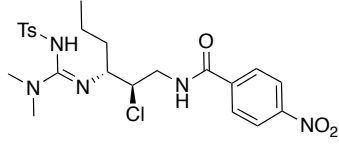

7a

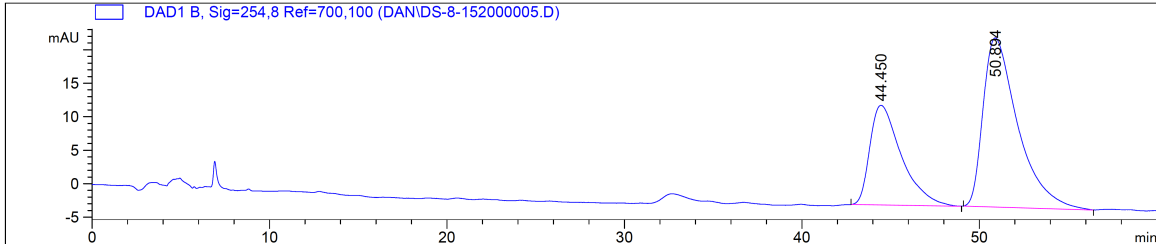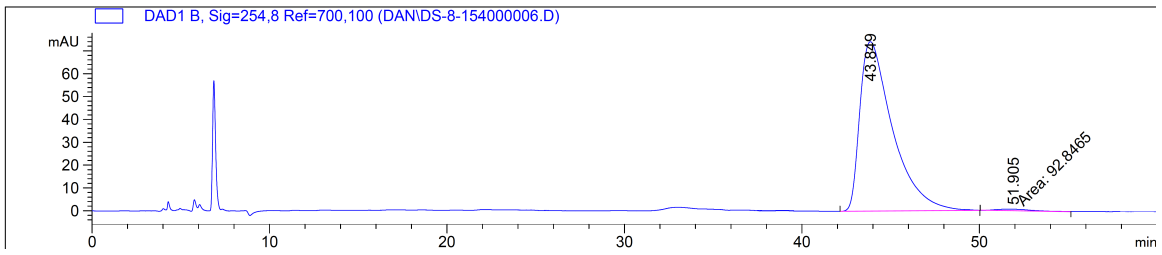

Signal 1: DAD1 B, Sig=254,8 Ref=700,100

| Peak # | RetTime [min] | Type | Width [min] | Area [mAU*s] | Height [mAU] | Area %  |
|--------|---------------|------|-------------|--------------|--------------|---------|
| 1      | 43.849        | BB   | 1.7508      | 9477.57227   | 74.16925     | 99.0299 |
| 2      | 51.905        | MM   | 2.1032      | 92.84650     | 7.35769e-1   | 0.9701  |

## XI References:

- (1) Soltanzadeh, B.; Jaganathan, A.; Staples, R. J.; Borhan, B. Highly Stereoselective Intermolecular Haloetherification and Haloesterification of Allyl Amides. *Angew. Chem. Int. Ed.* **2015**, *54*, 9517.
- (2) Gadwood, R. C.; Kamdar, B. V.; Dubray, L. A.; Wolfe, M. L.; Smith, M. P.; Watt, W.; Mizsak, S. A.; Groppi, V. E. Synthesis and biological activity of spirocyclic benzopyran imidazolone potassium channel openers. *J. Med. Chem.* **1993**, *36*, 1480.
- (3) Whitehead, D. C.; Yousefi, R.; Jaganathan, A.; Borhan, B. An Organocatalytic Asymmetric Chlorolactonization. *J. Am. Chem. Soc.* **2010**, *132*, 3298.

## **XII NMR Spectra:**

<sup>1</sup>H NMR (500 MHz, CDCl<sub>3</sub>)

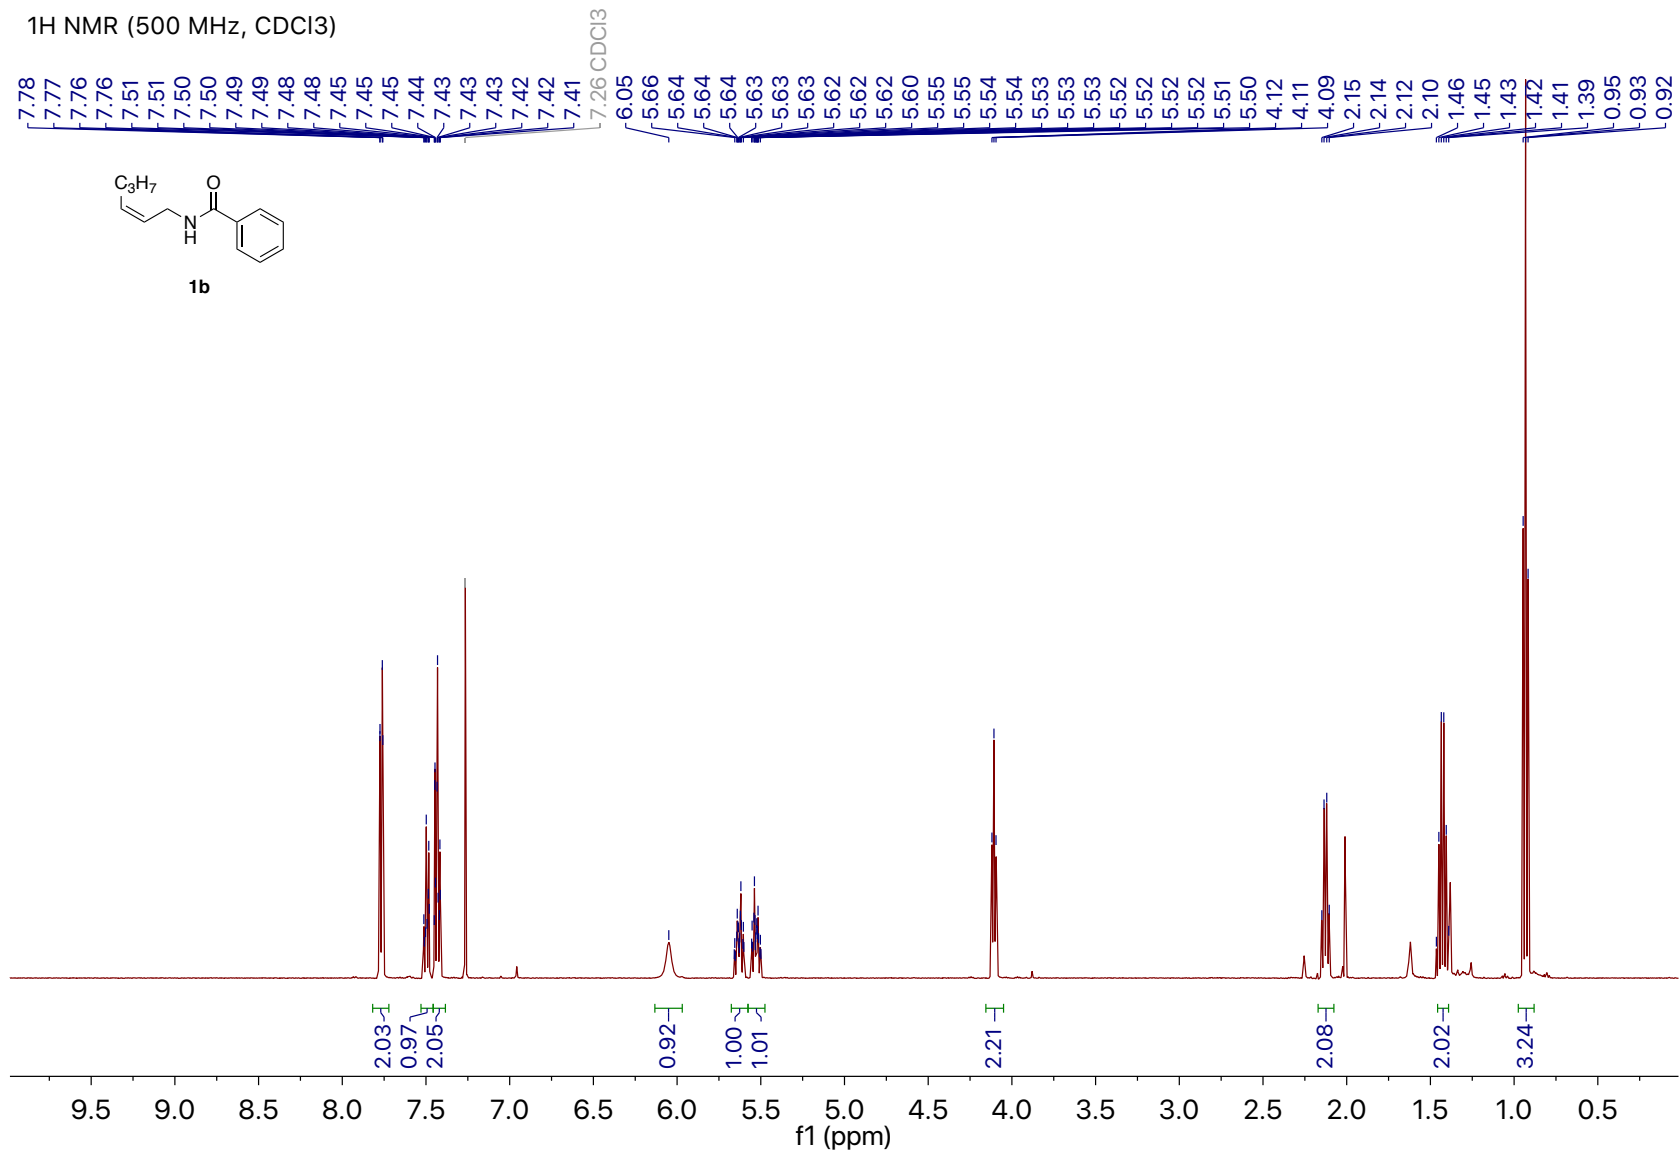



13C NMR (126 MHz, CDCl3)

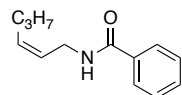

1b

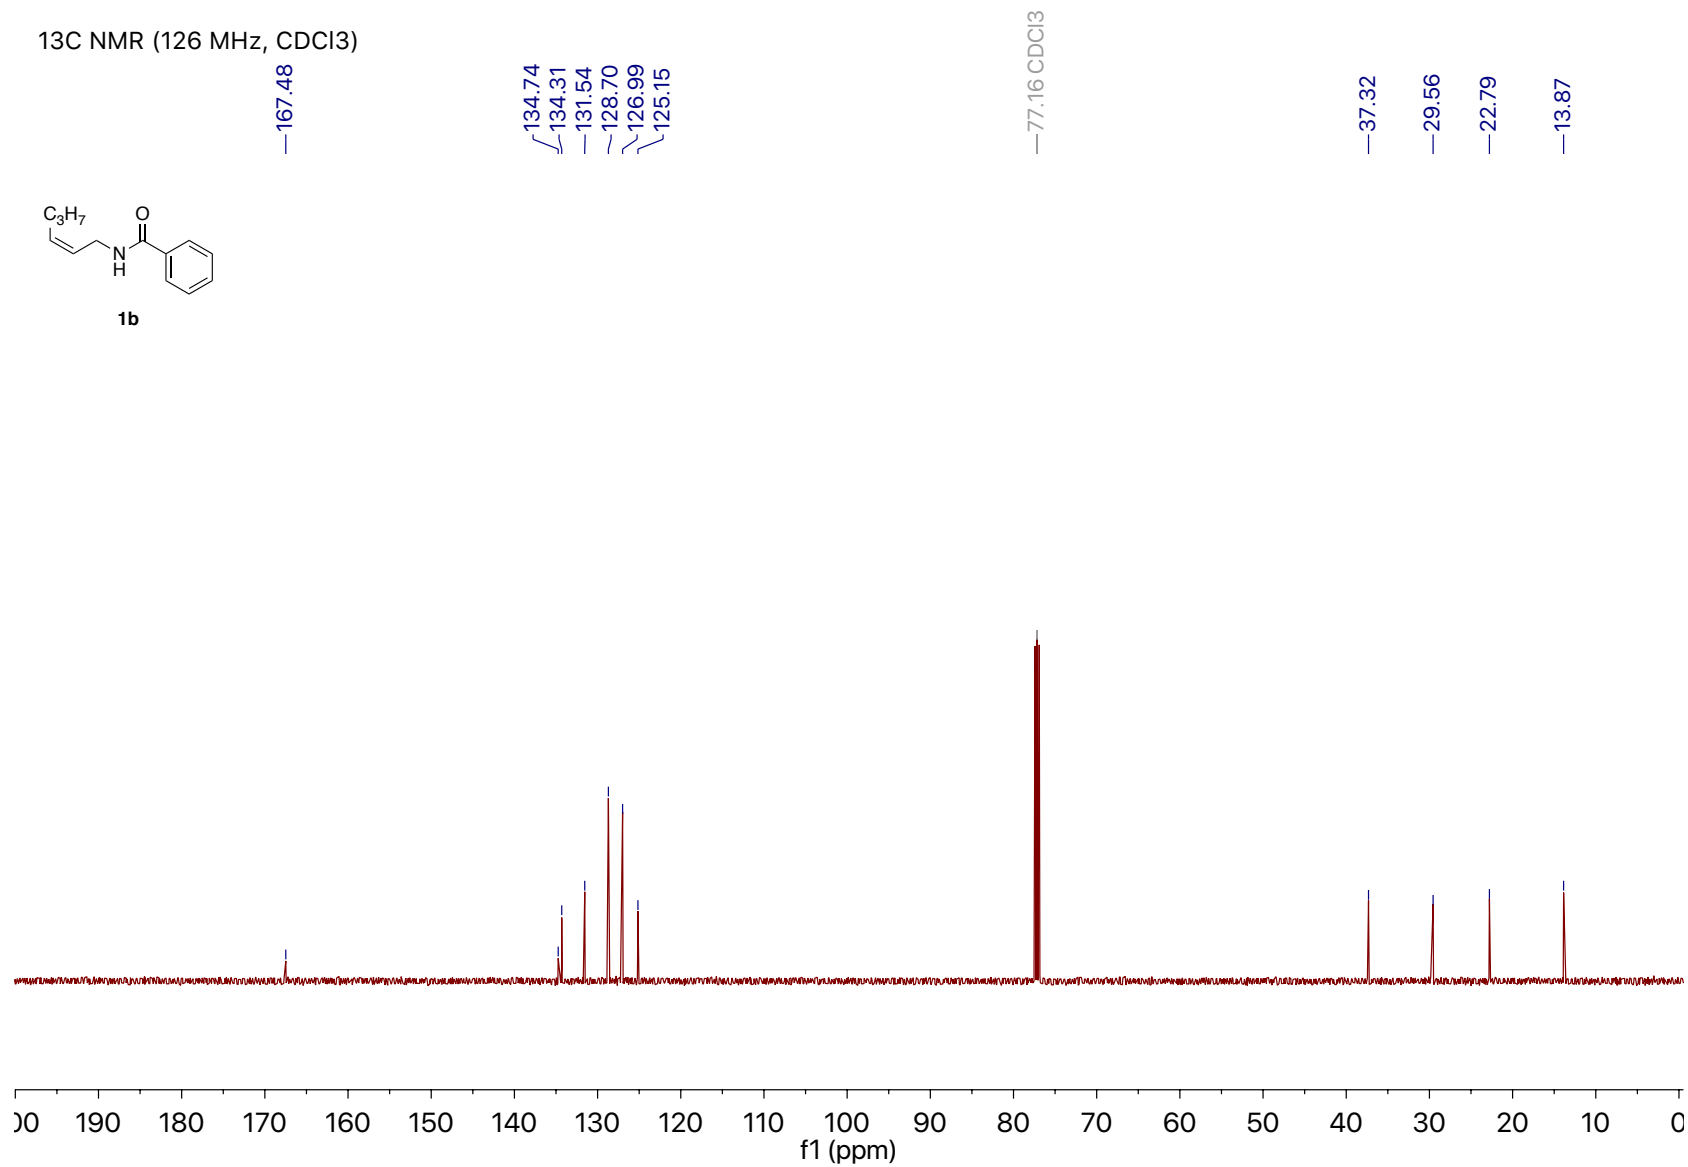

1H NMR (500 MHz, CDCl3)

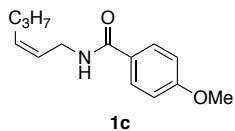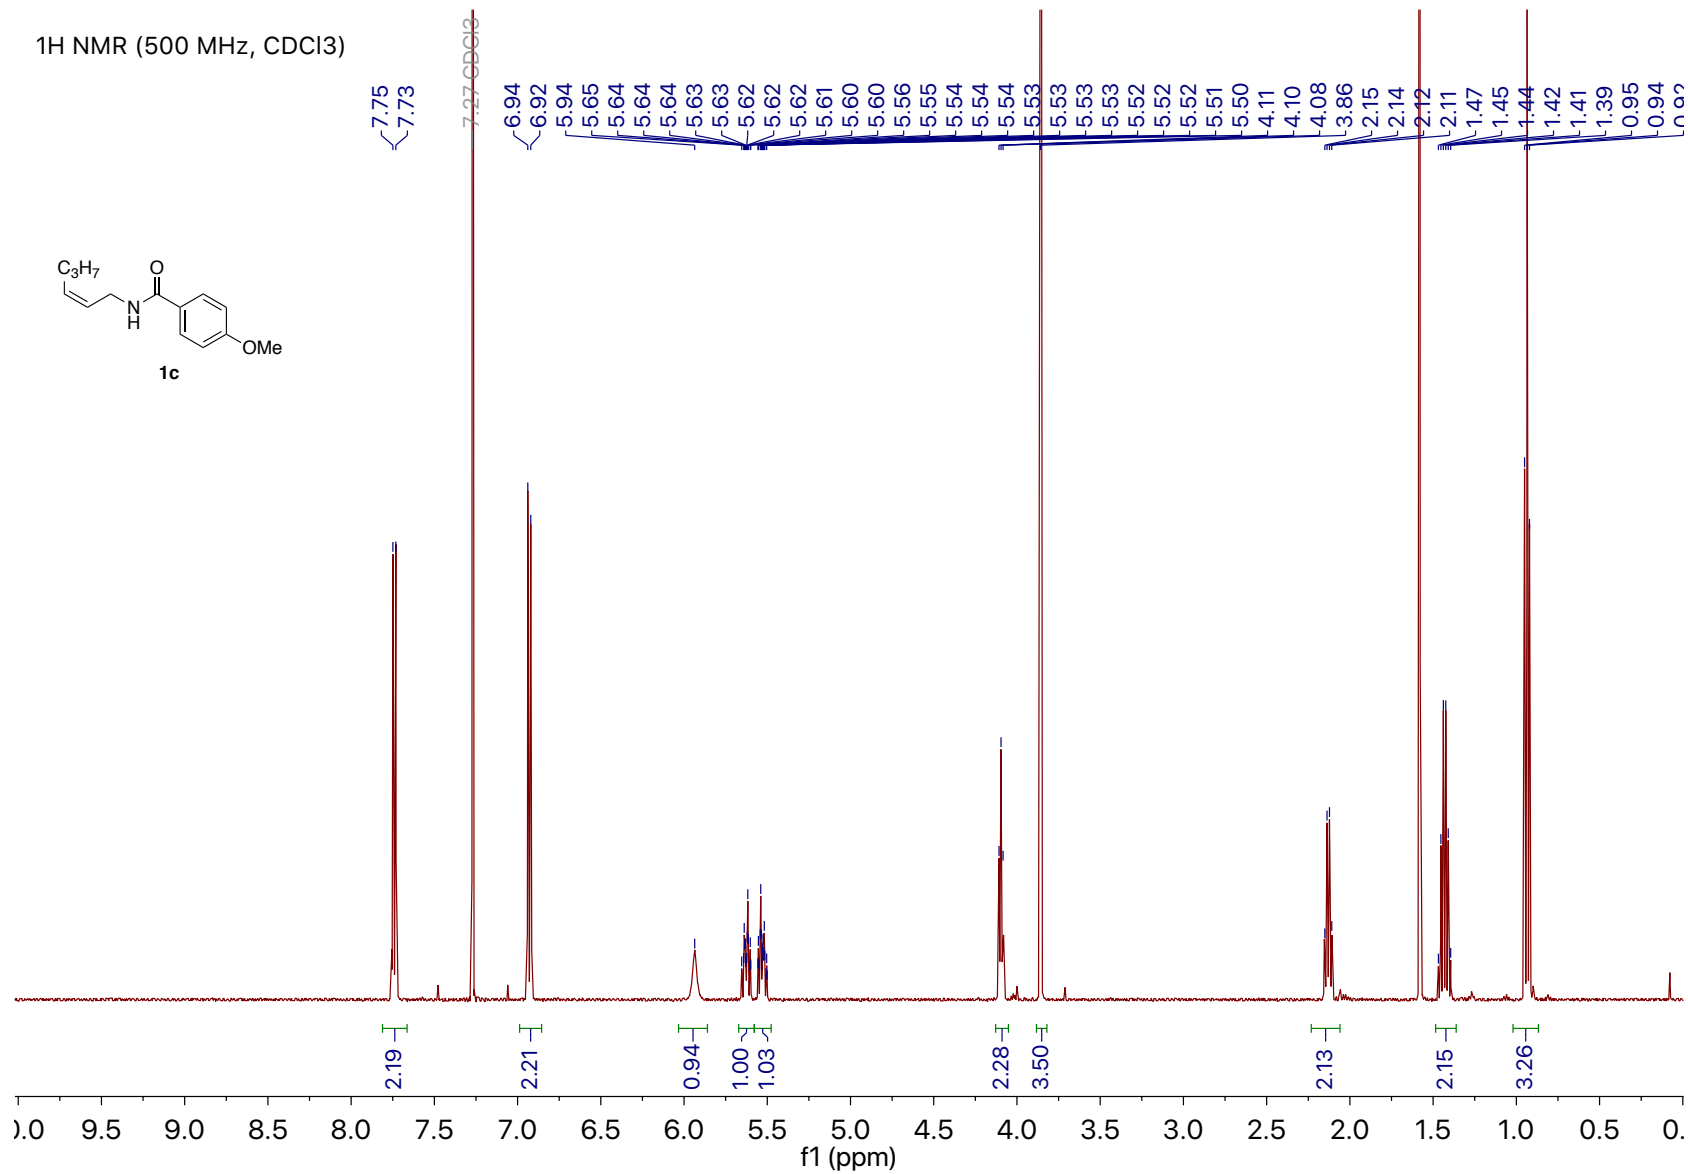

13C NMR (126 MHz, CDCl3)

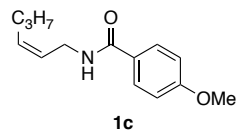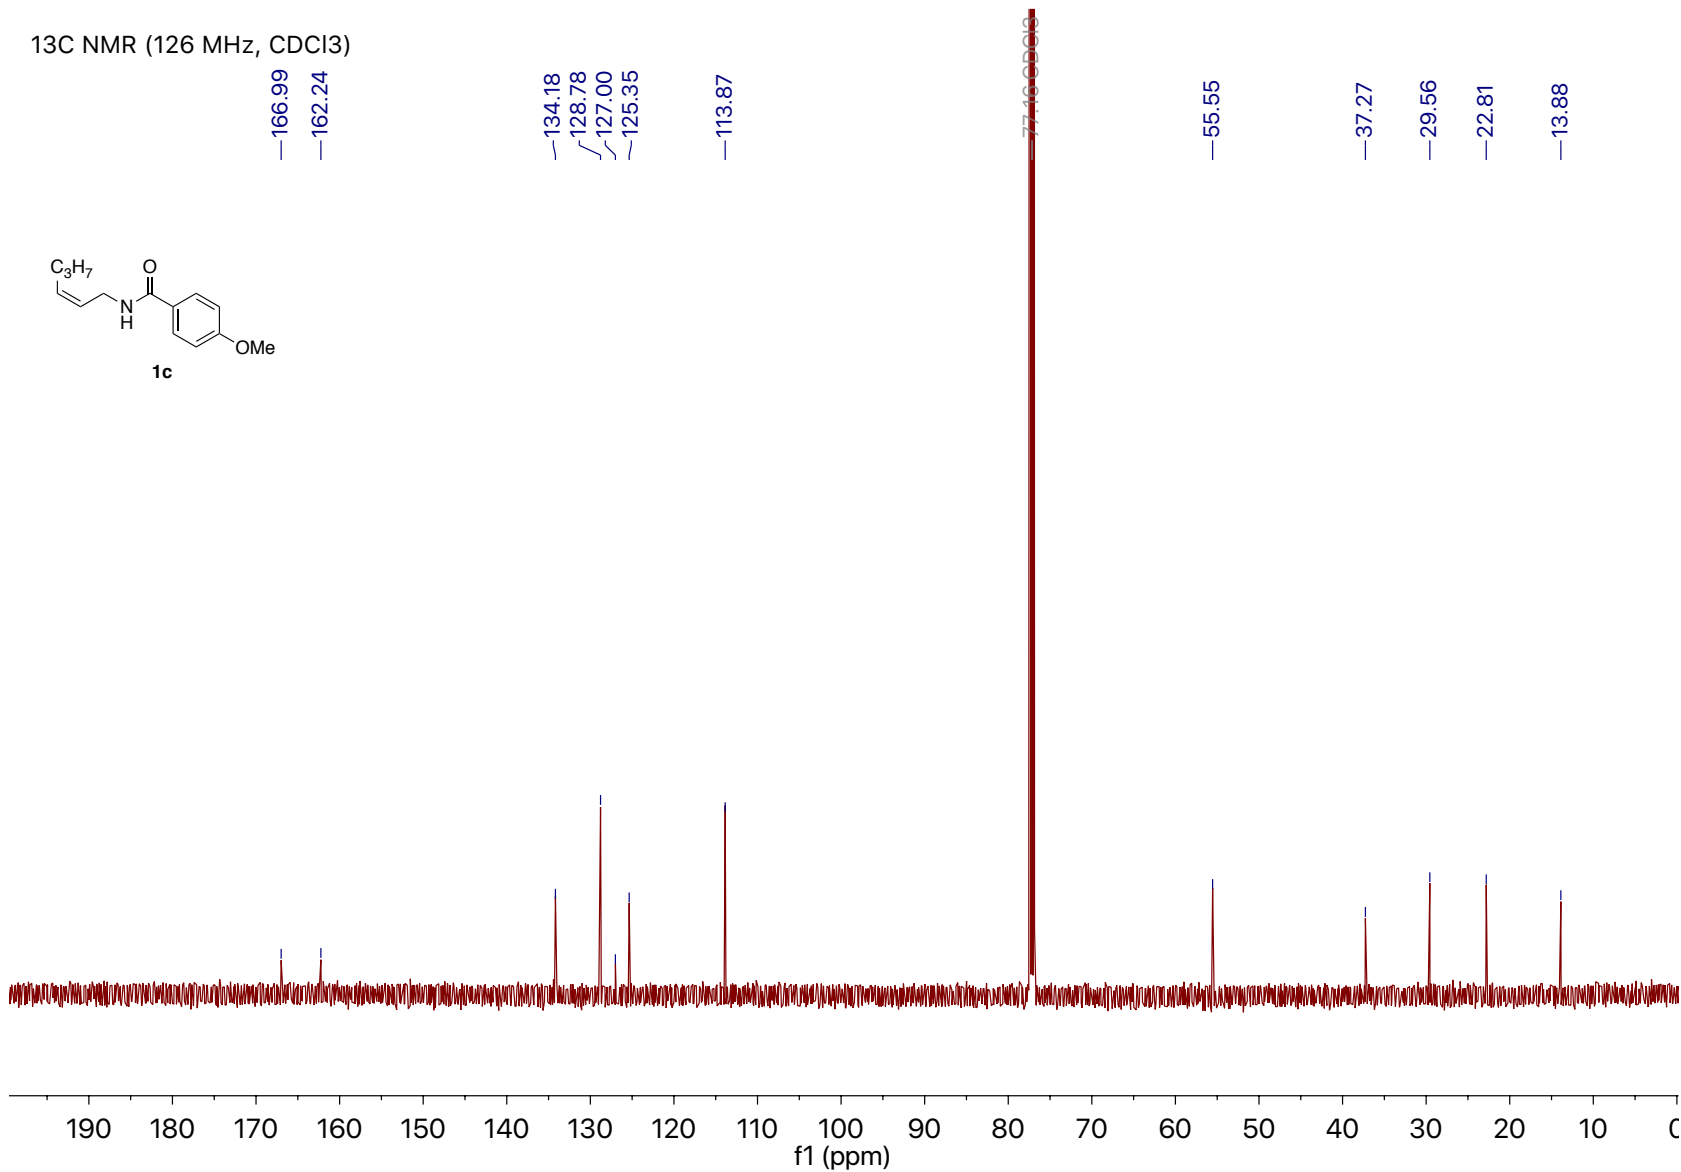

1H NMR (500 MHz, CDCl3)

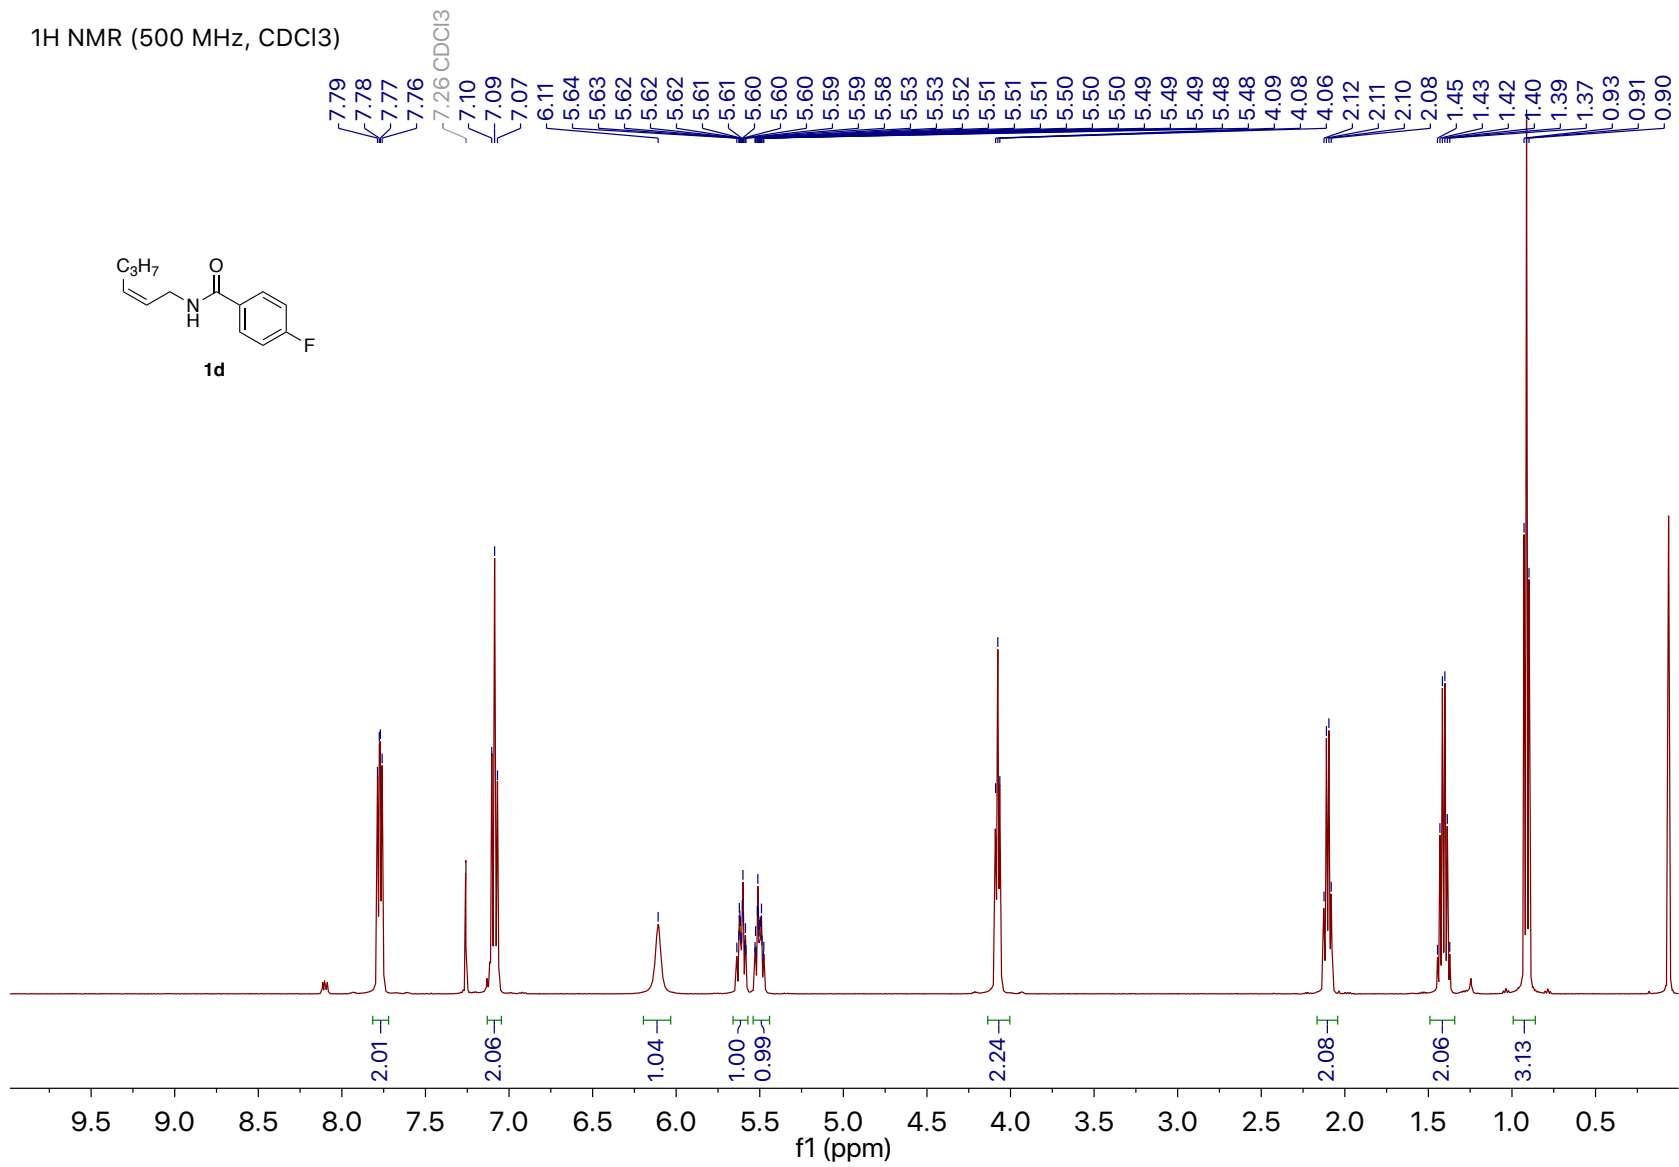

<sup>13</sup>C NMR (126 MHz, CDCl<sub>3</sub>)

166.48  
165.79  
163.79

134.33  
130.86  
130.84  
129.37  
129.30  
125.02  
115.78  
115.60

-77.16 CDCl<sub>3</sub>

-37.39

-29.54

-22.76

-13.85

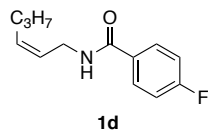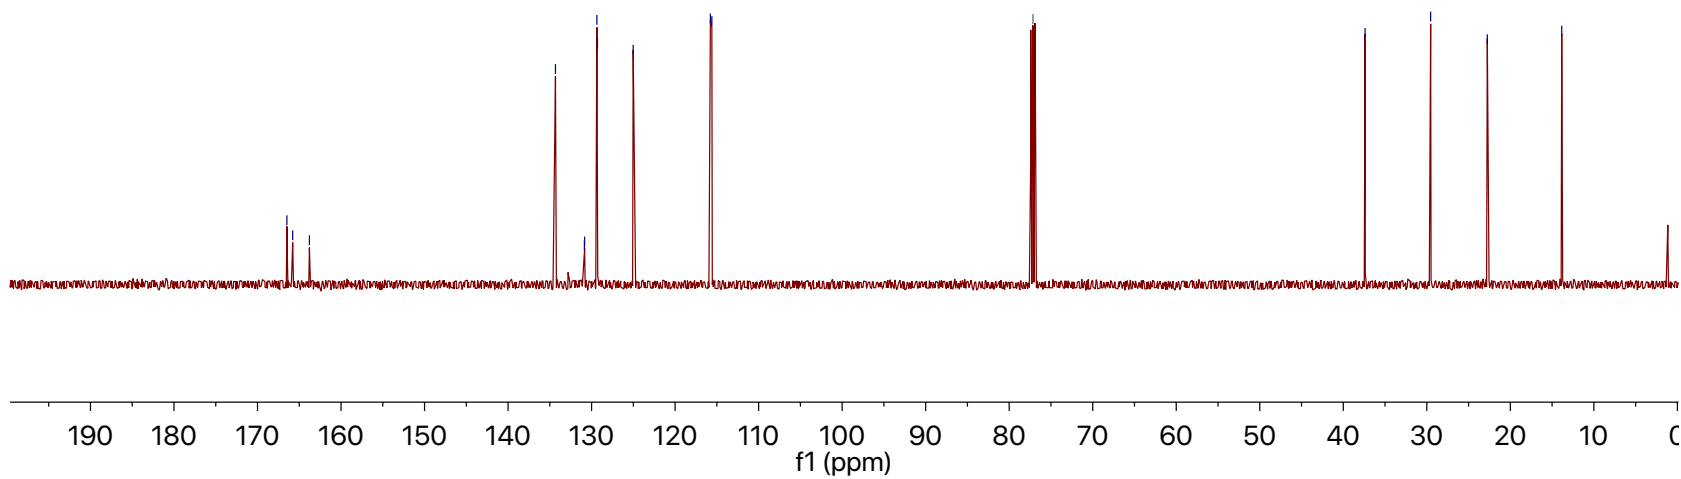

19F NMR (470 MHz, CDCl3)

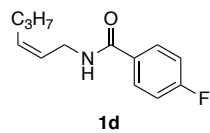

-108.40

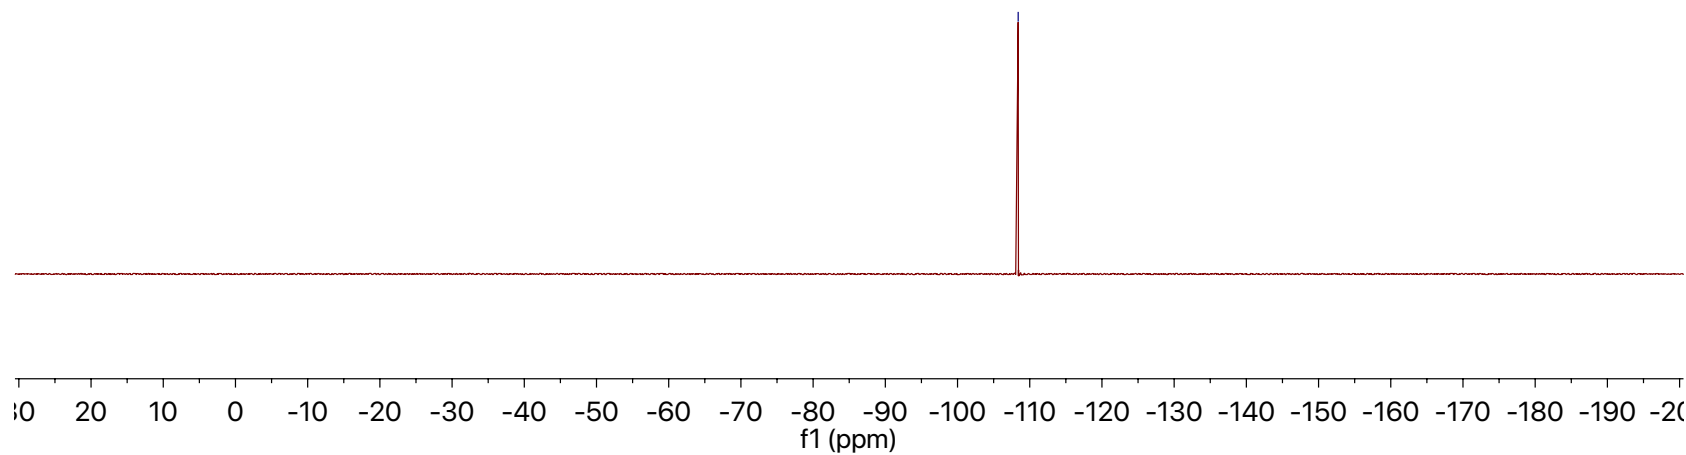

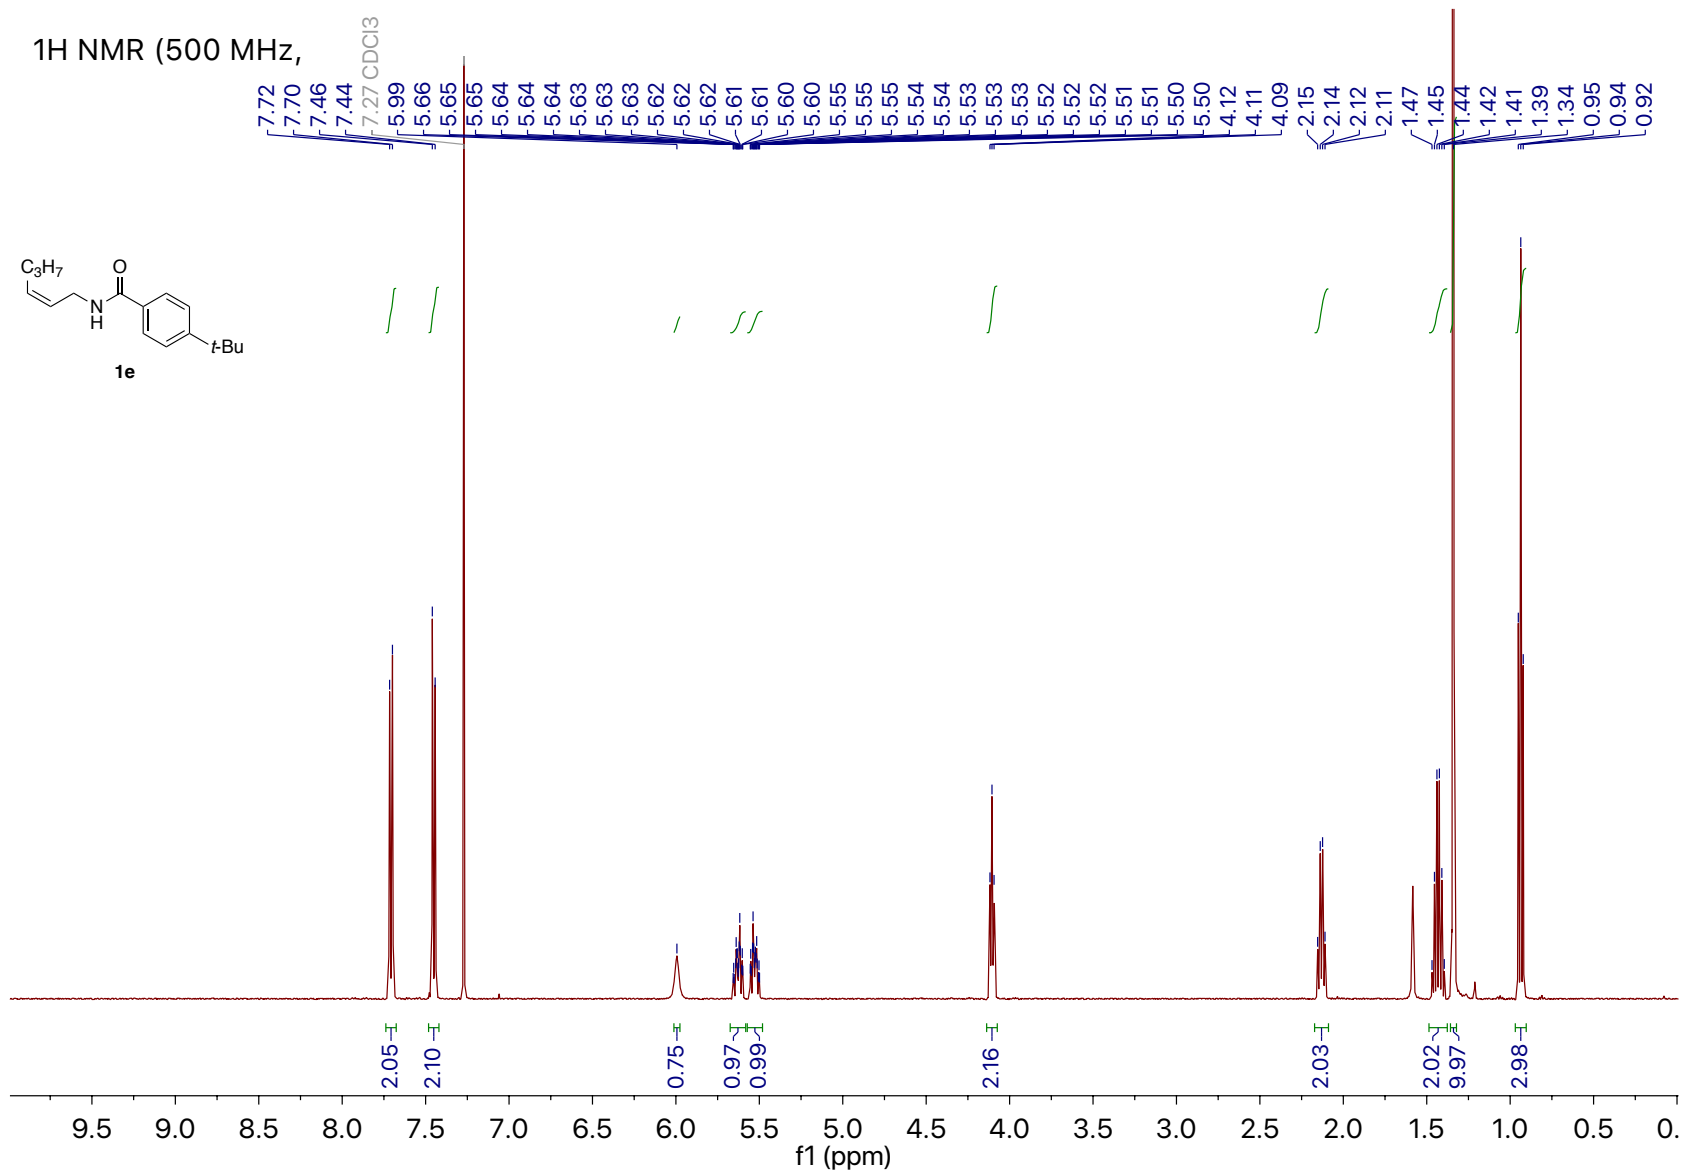

<sup>13</sup>C NMR (126 MHz, CDCl<sub>3</sub>)

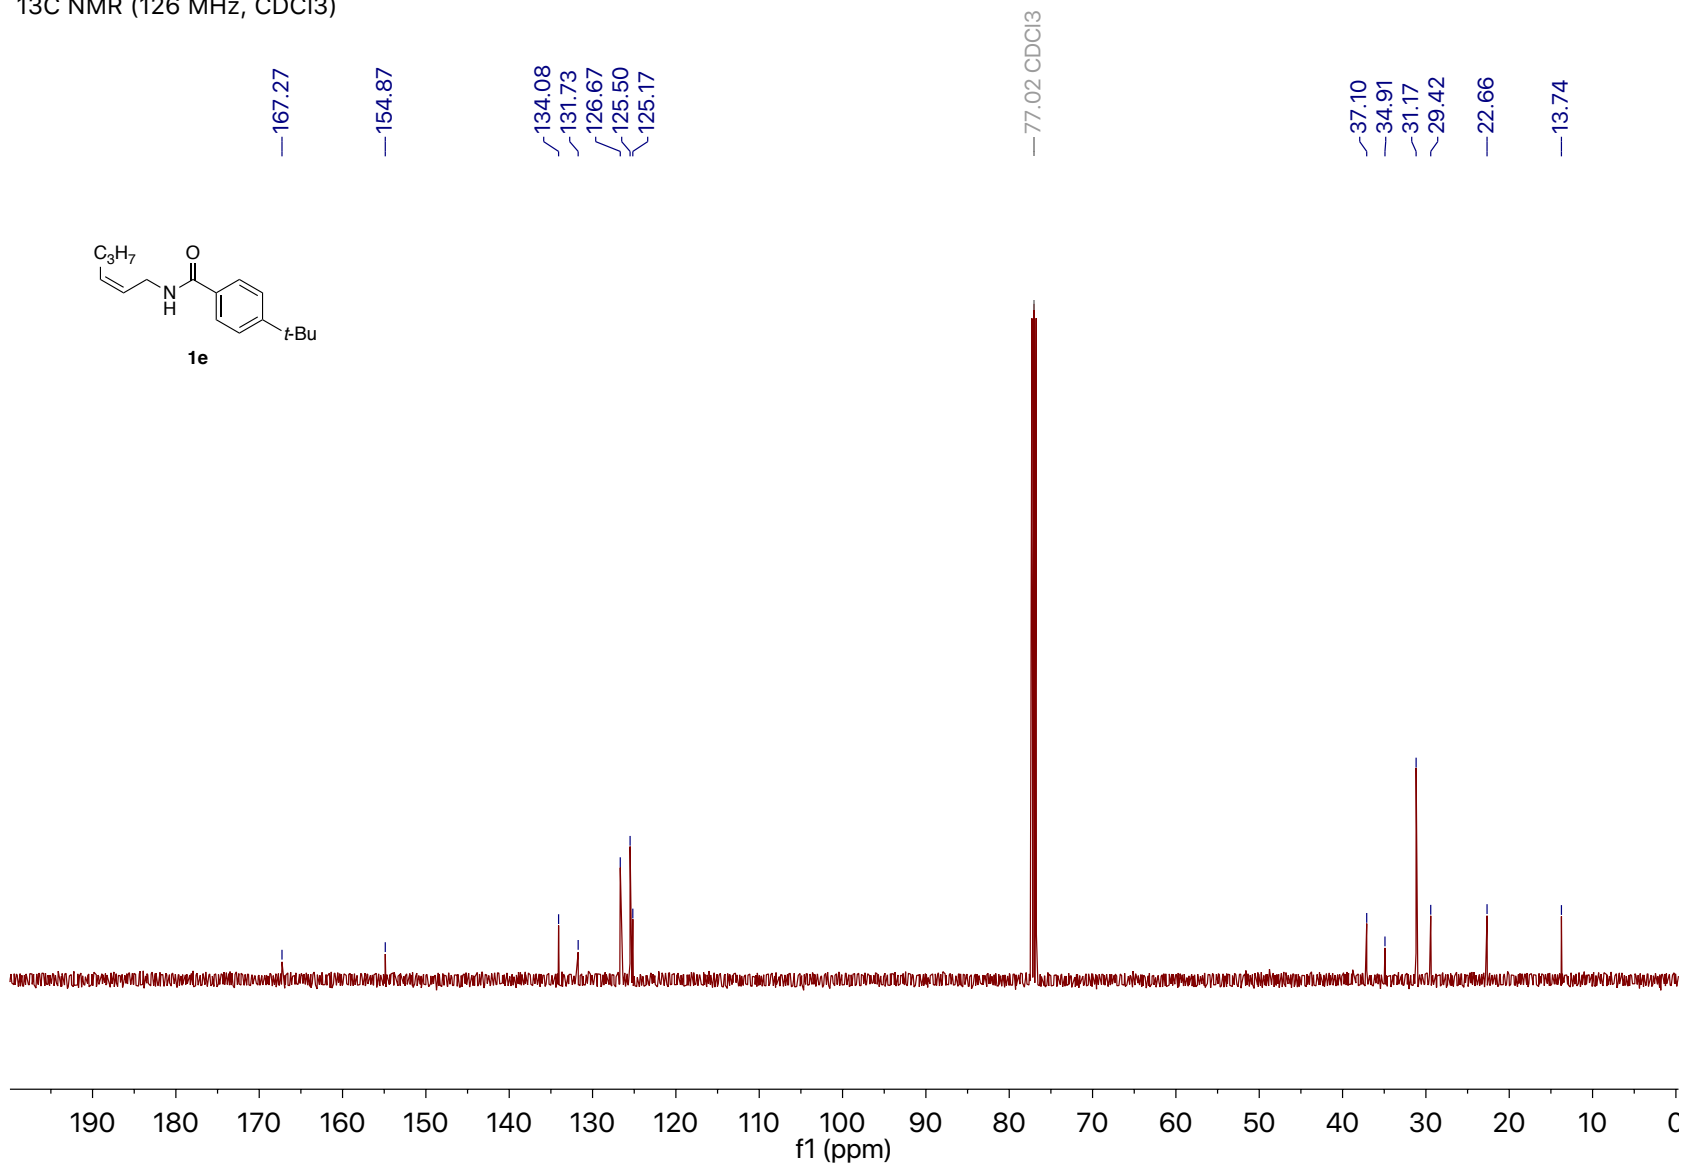



1H NMR (500 MHz, CDCl3)

7.26 CDCl3  
5.58  
5.58  
5.58  
5.57  
5.57  
5.56  
5.56  
5.55  
5.55  
5.54  
5.54  
5.53  
5.53  
5.46  
5.43  
5.42  
5.41  
5.41  
5.41  
5.41  
5.40  
5.40  
5.40  
5.39  
5.39  
5.39  
5.38  
5.38  
5.37  
5.37  
3.89  
3.88  
3.87  
2.07  
2.06  
2.04  
2.03  
1.98  
1.42  
1.41  
1.39  
1.38  
1.36  
1.35  
0.91  
0.90  
0.88

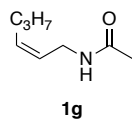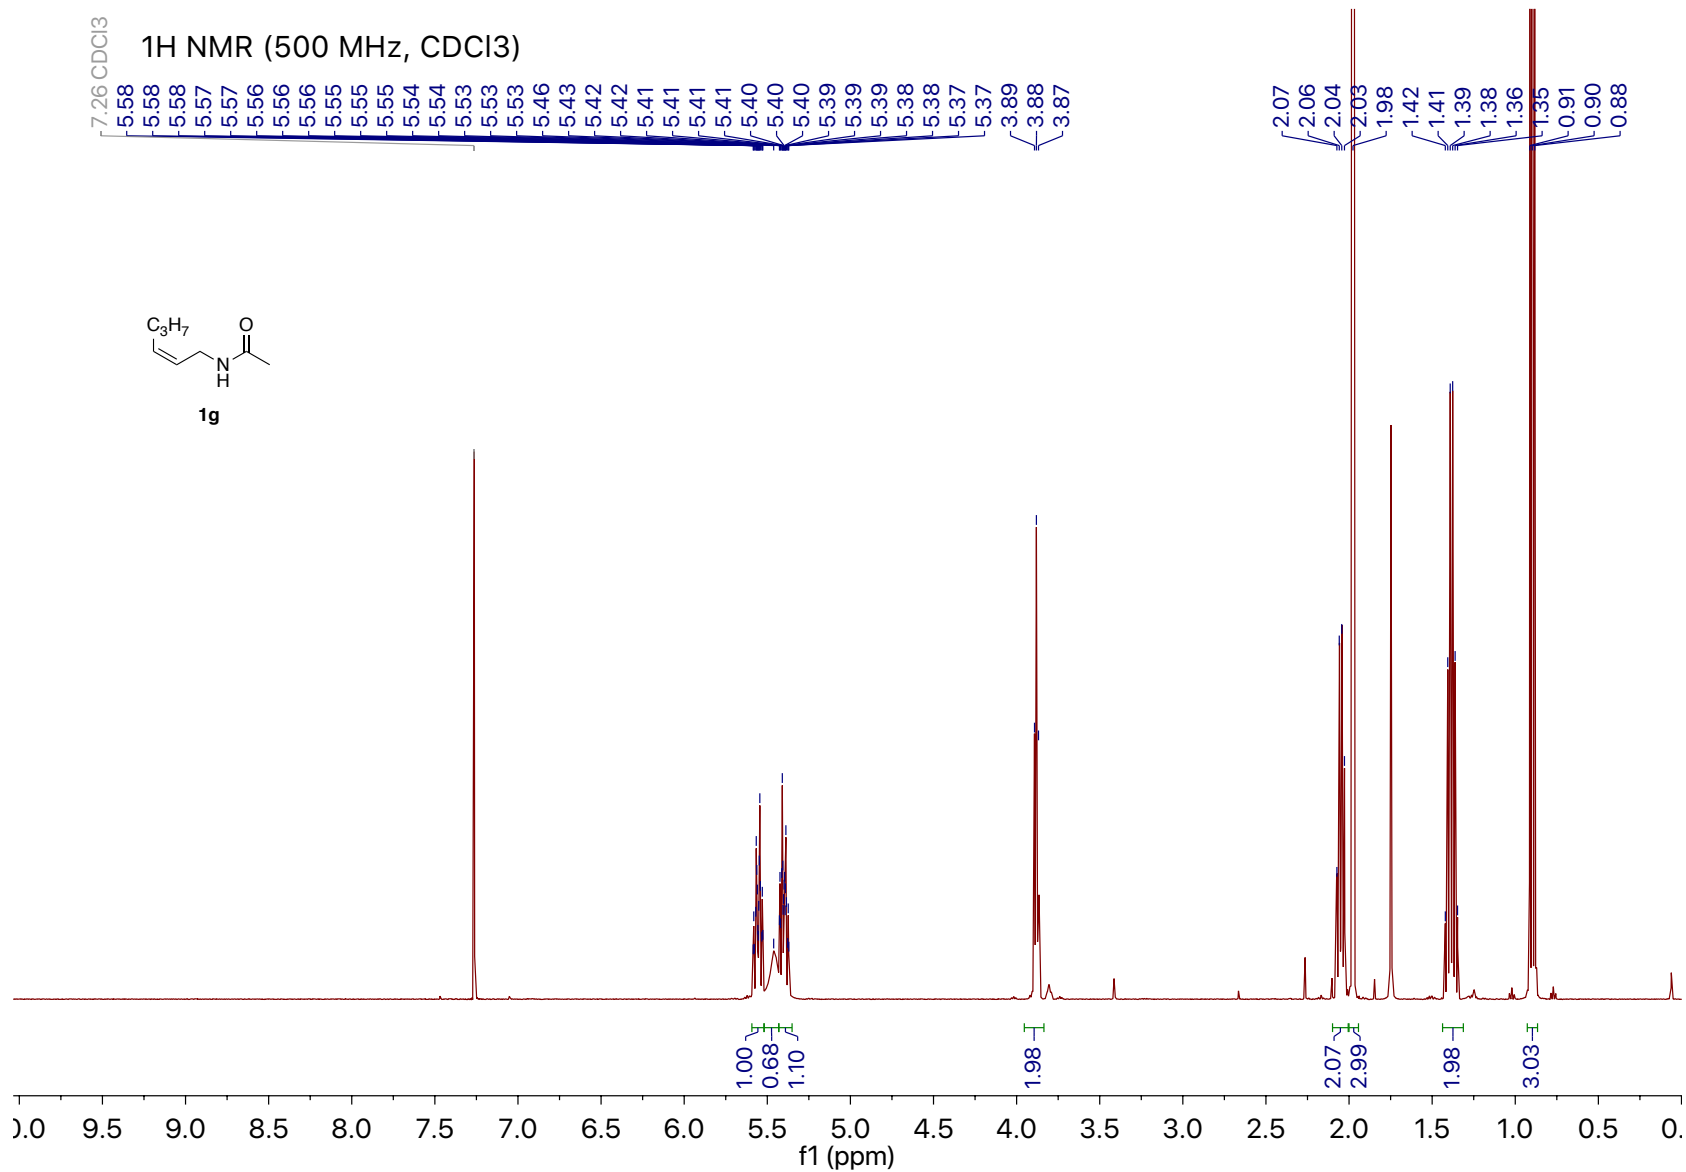

<sup>13</sup>C NMR (126 MHz, CDCl<sub>3</sub>)

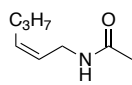

**1g**

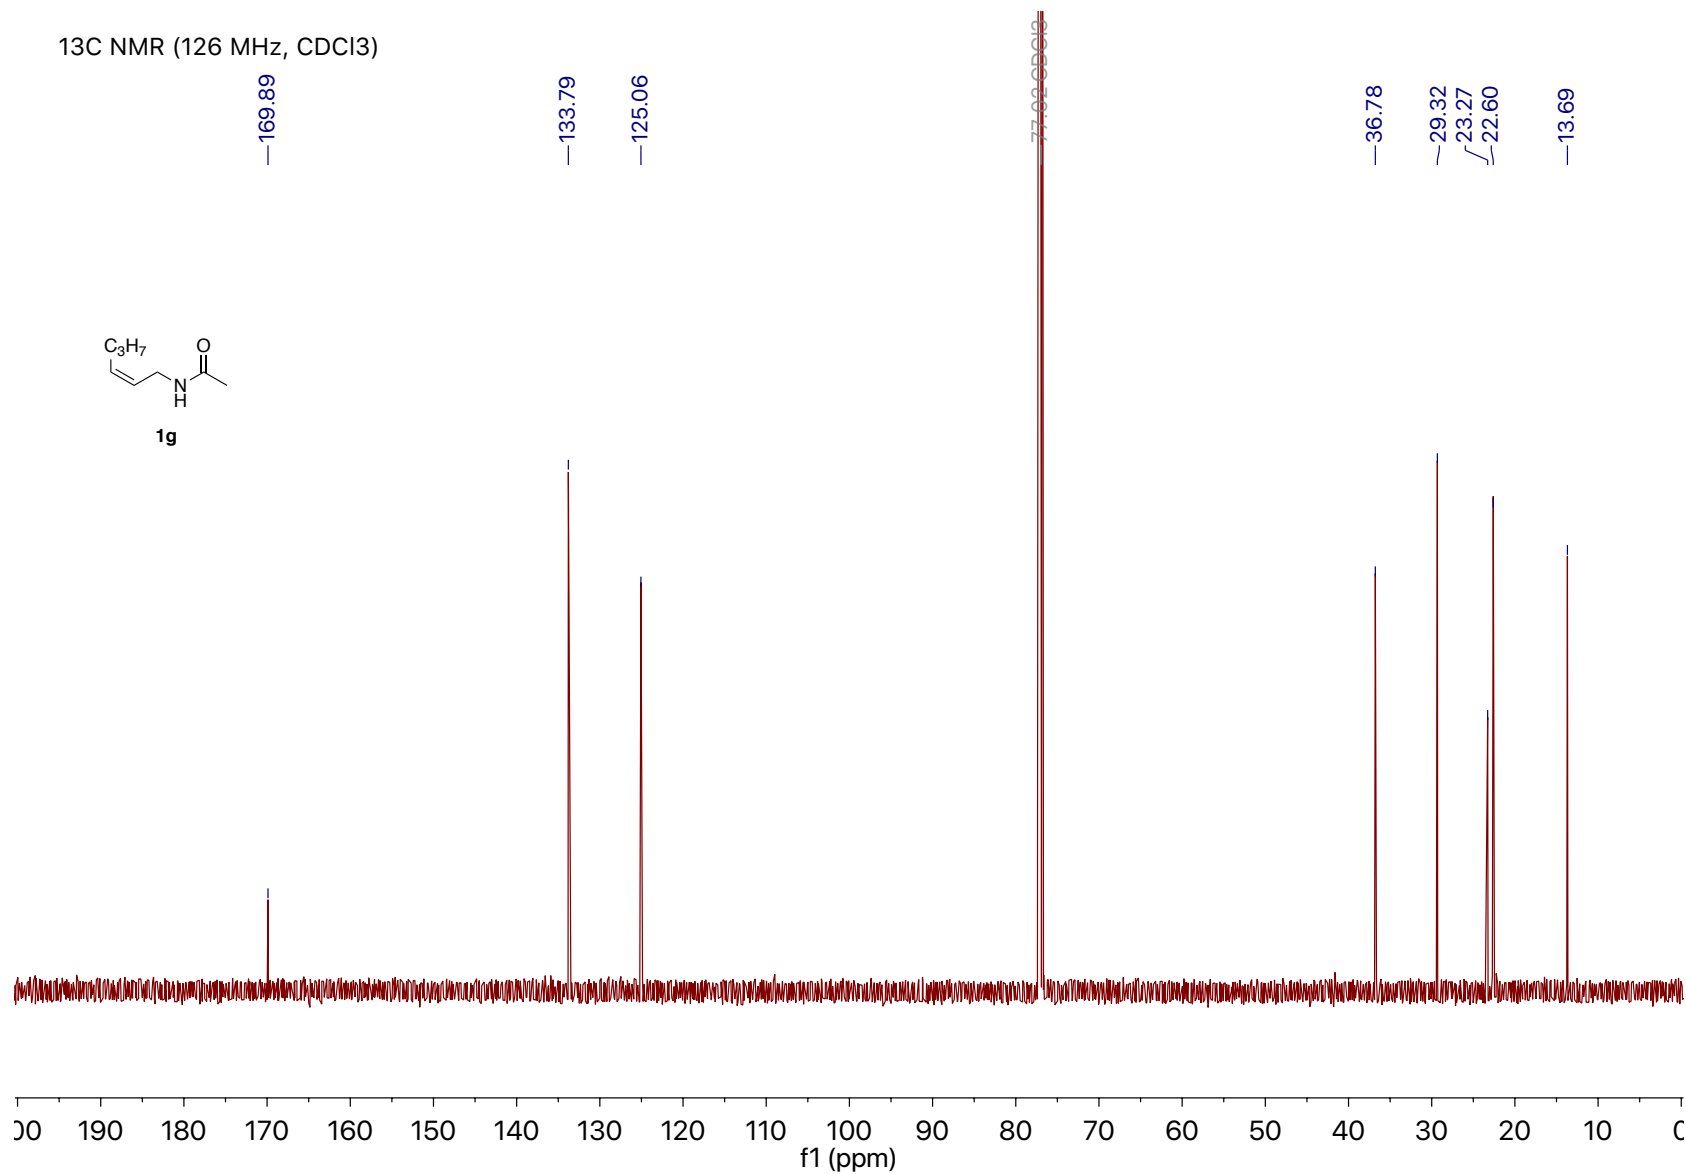

1H NMR (500 MHz, CDCl3)

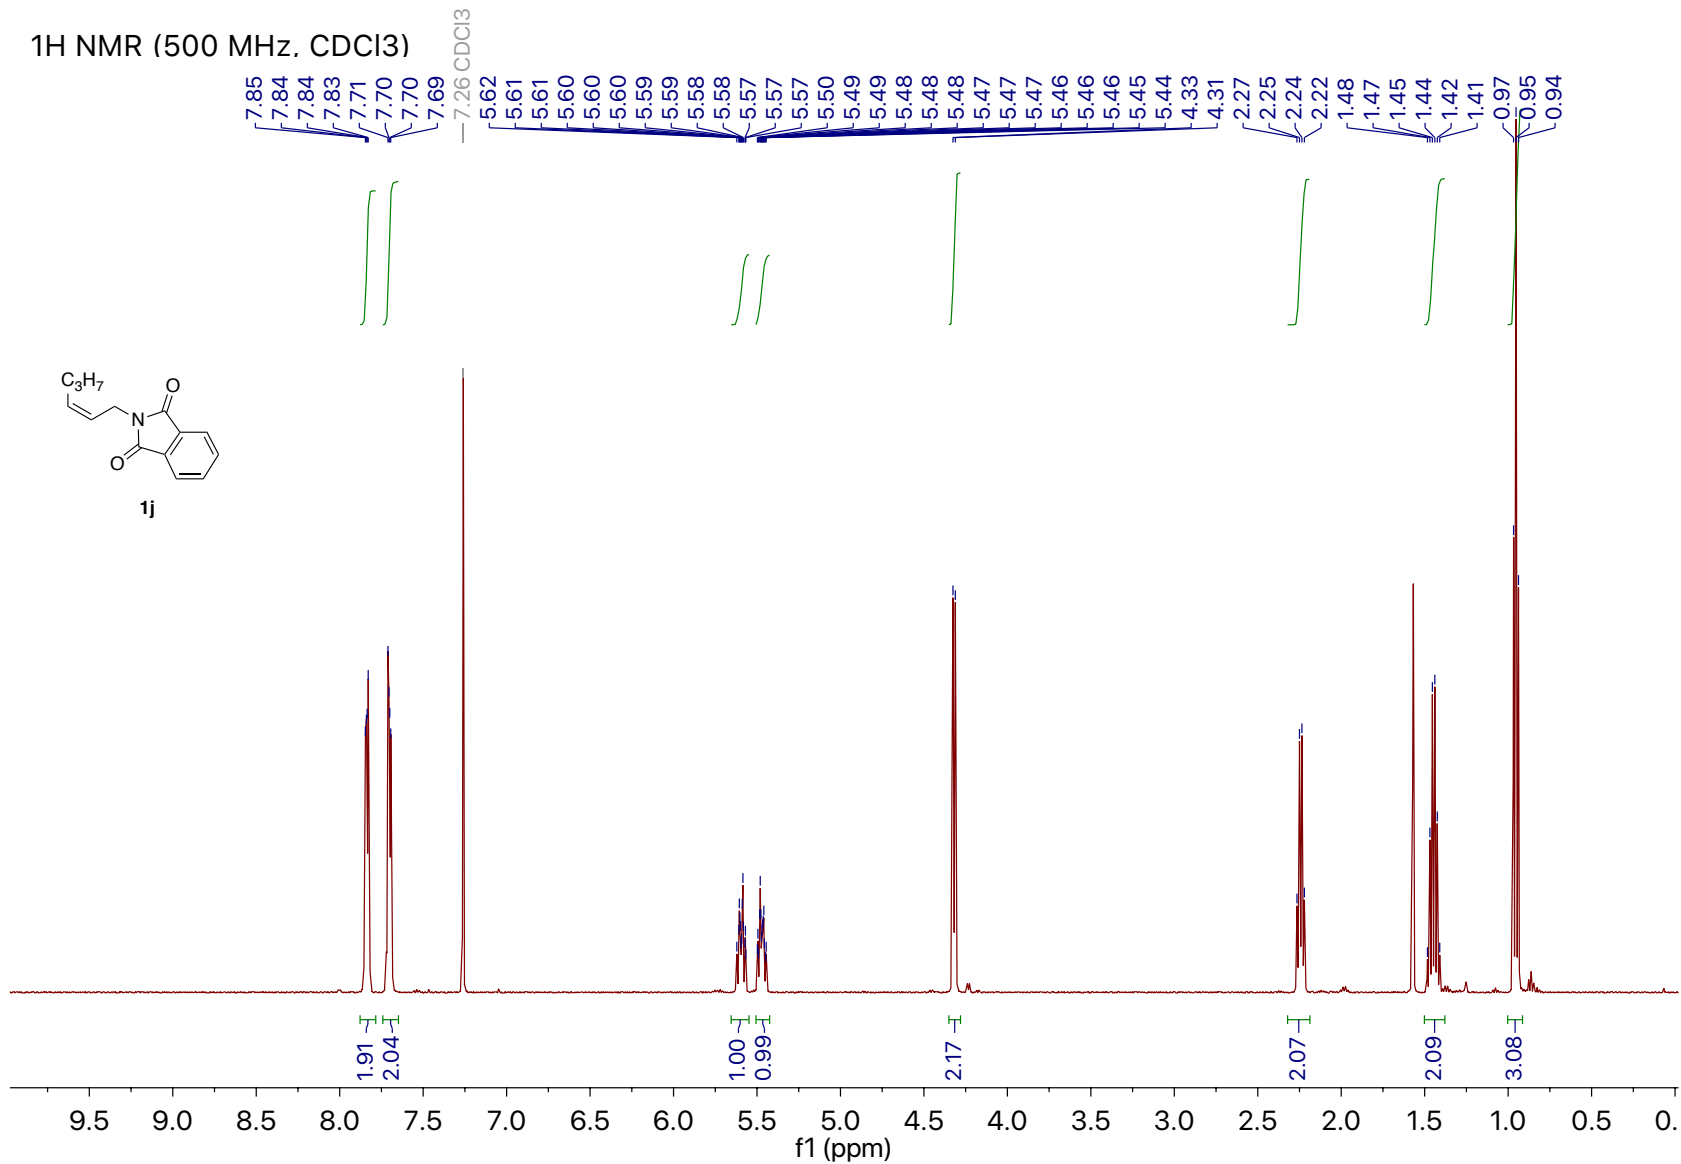

<sup>13</sup>C NMR (126 MHz, CDCl<sub>3</sub>)

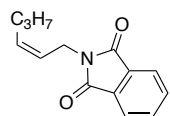

1j

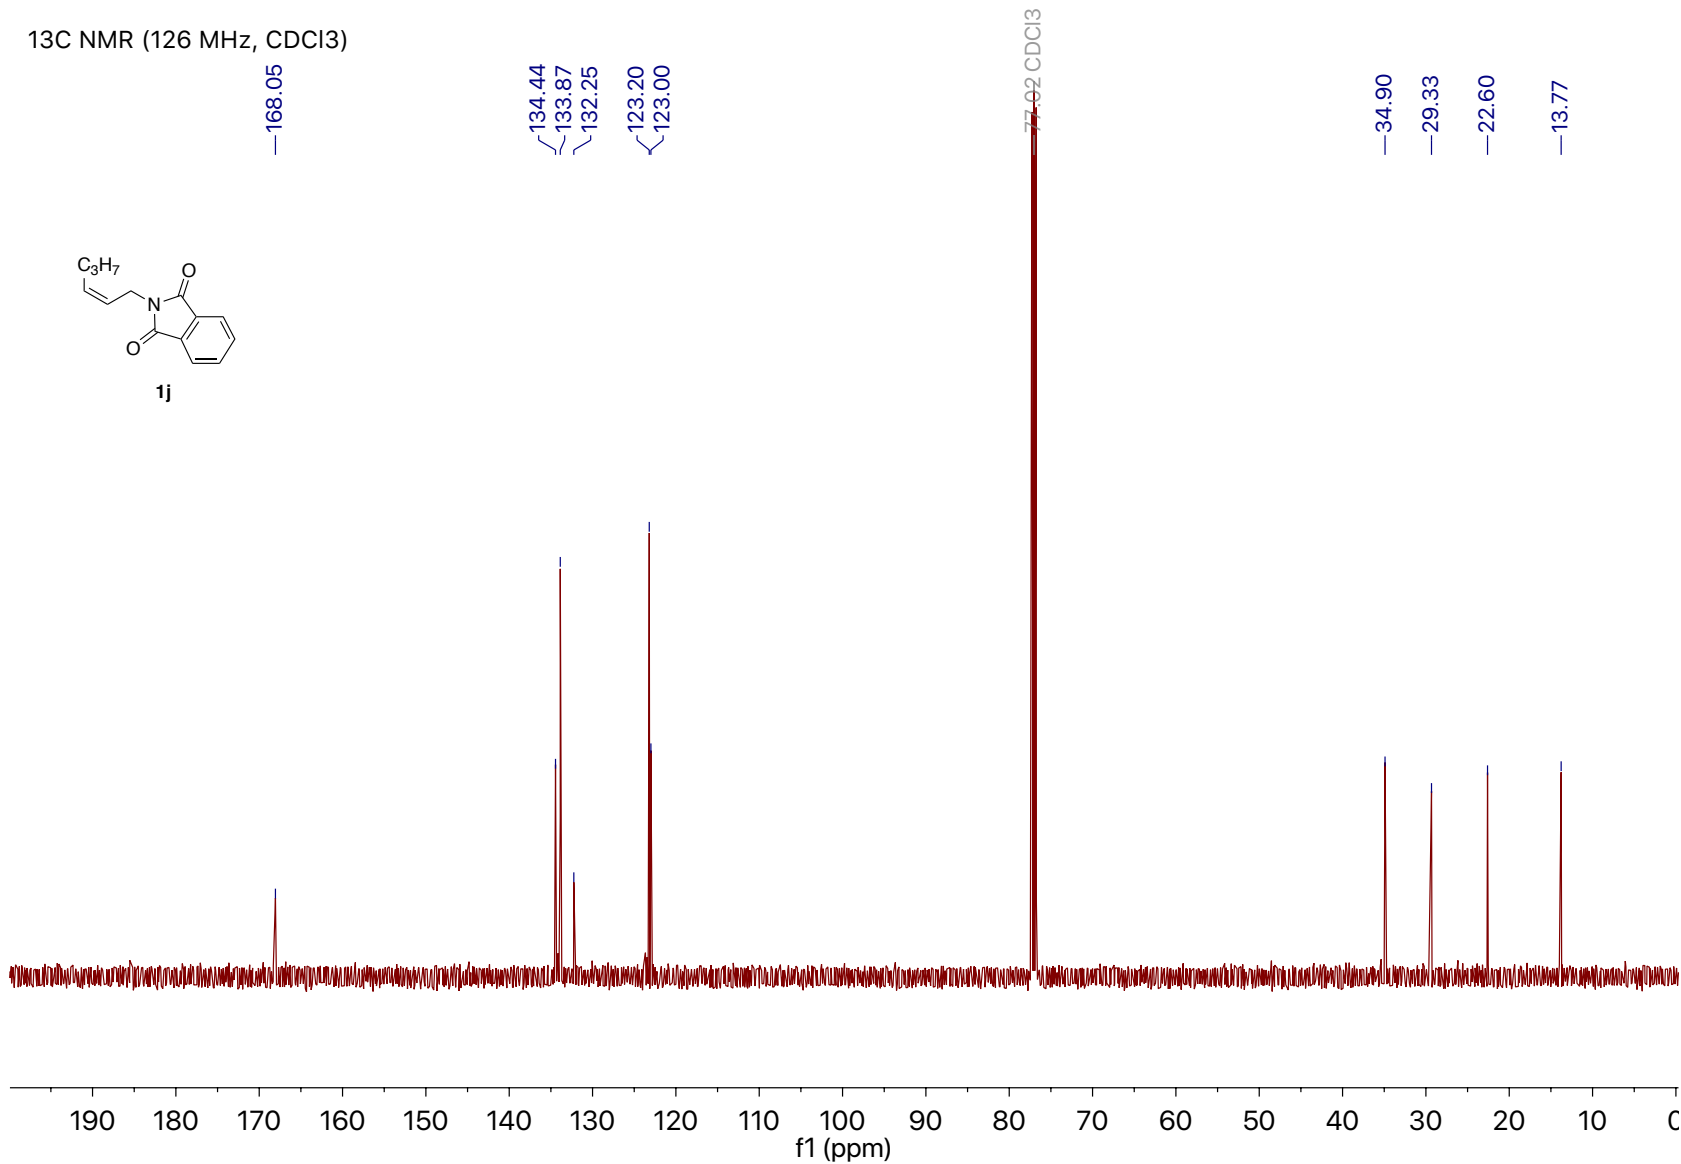

1H NMR (500 MHz, CDCl3)

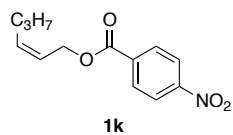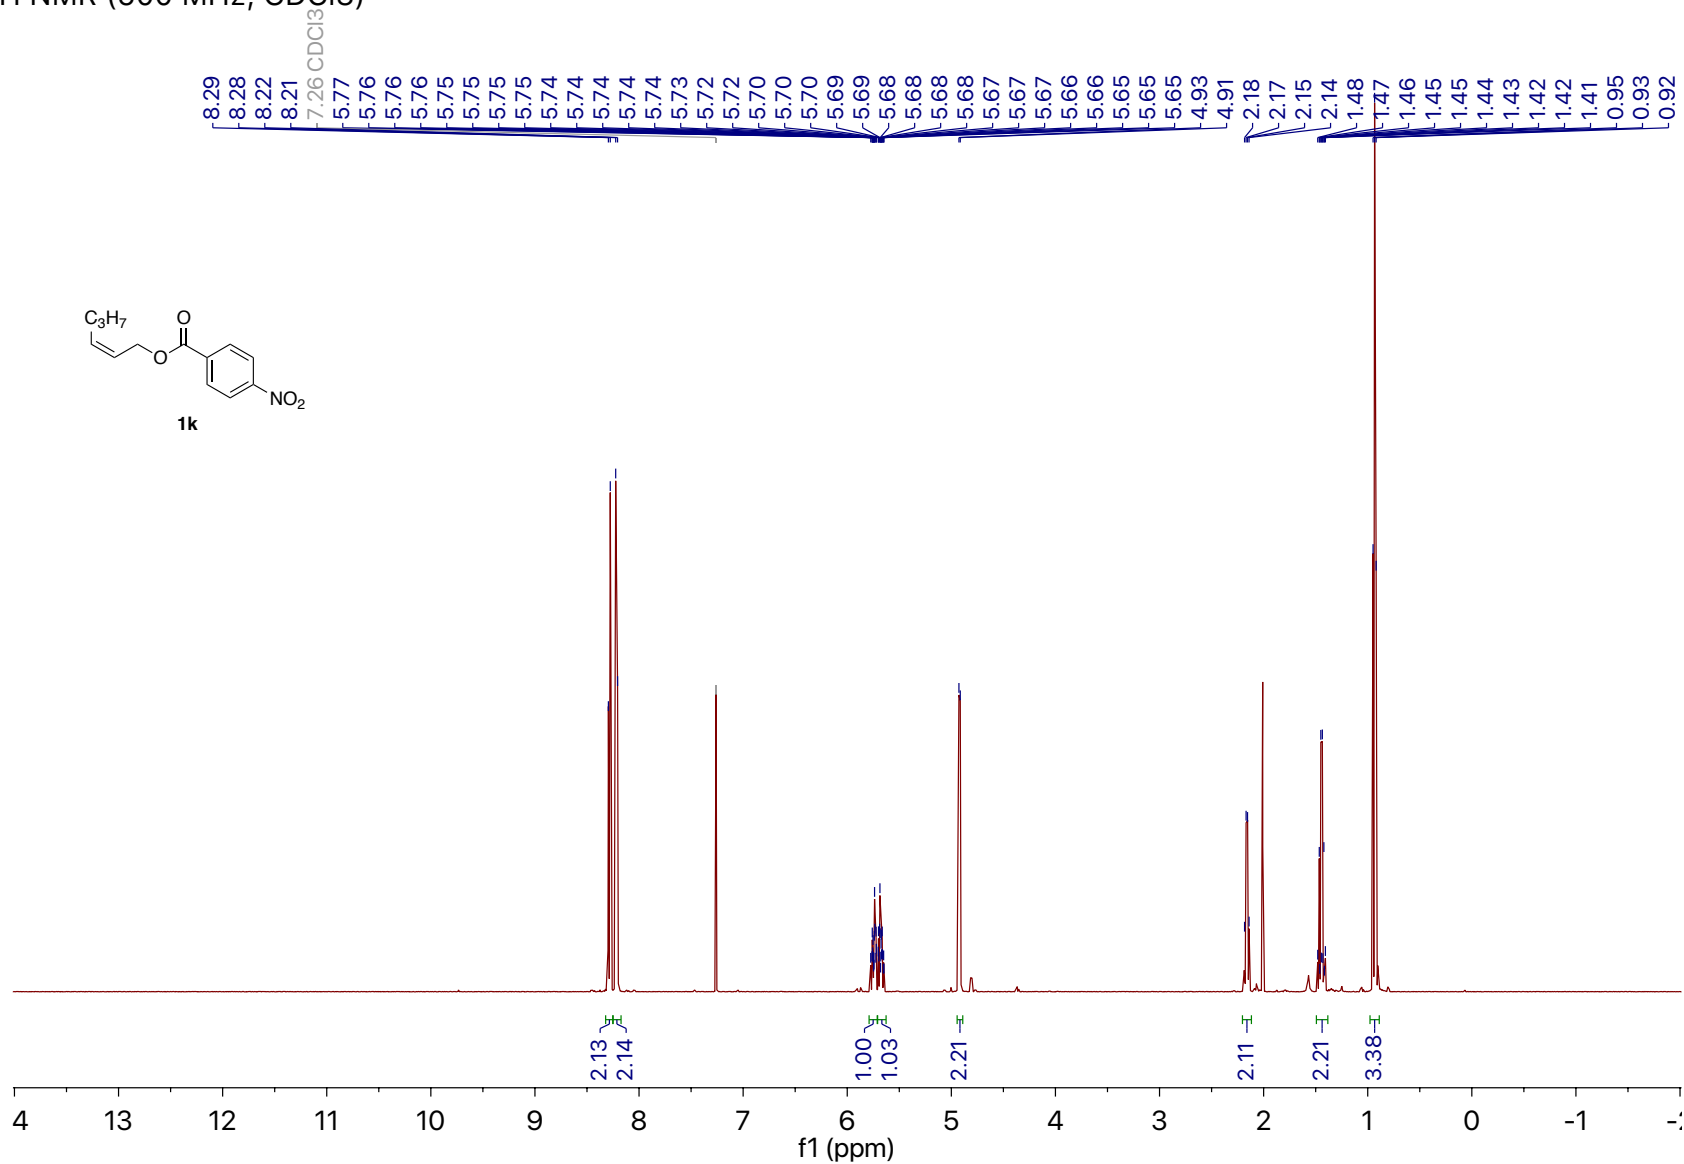

<sup>13</sup>C NMR (126 MHz, CDCl<sub>3</sub>)

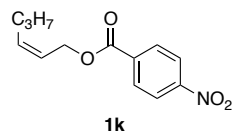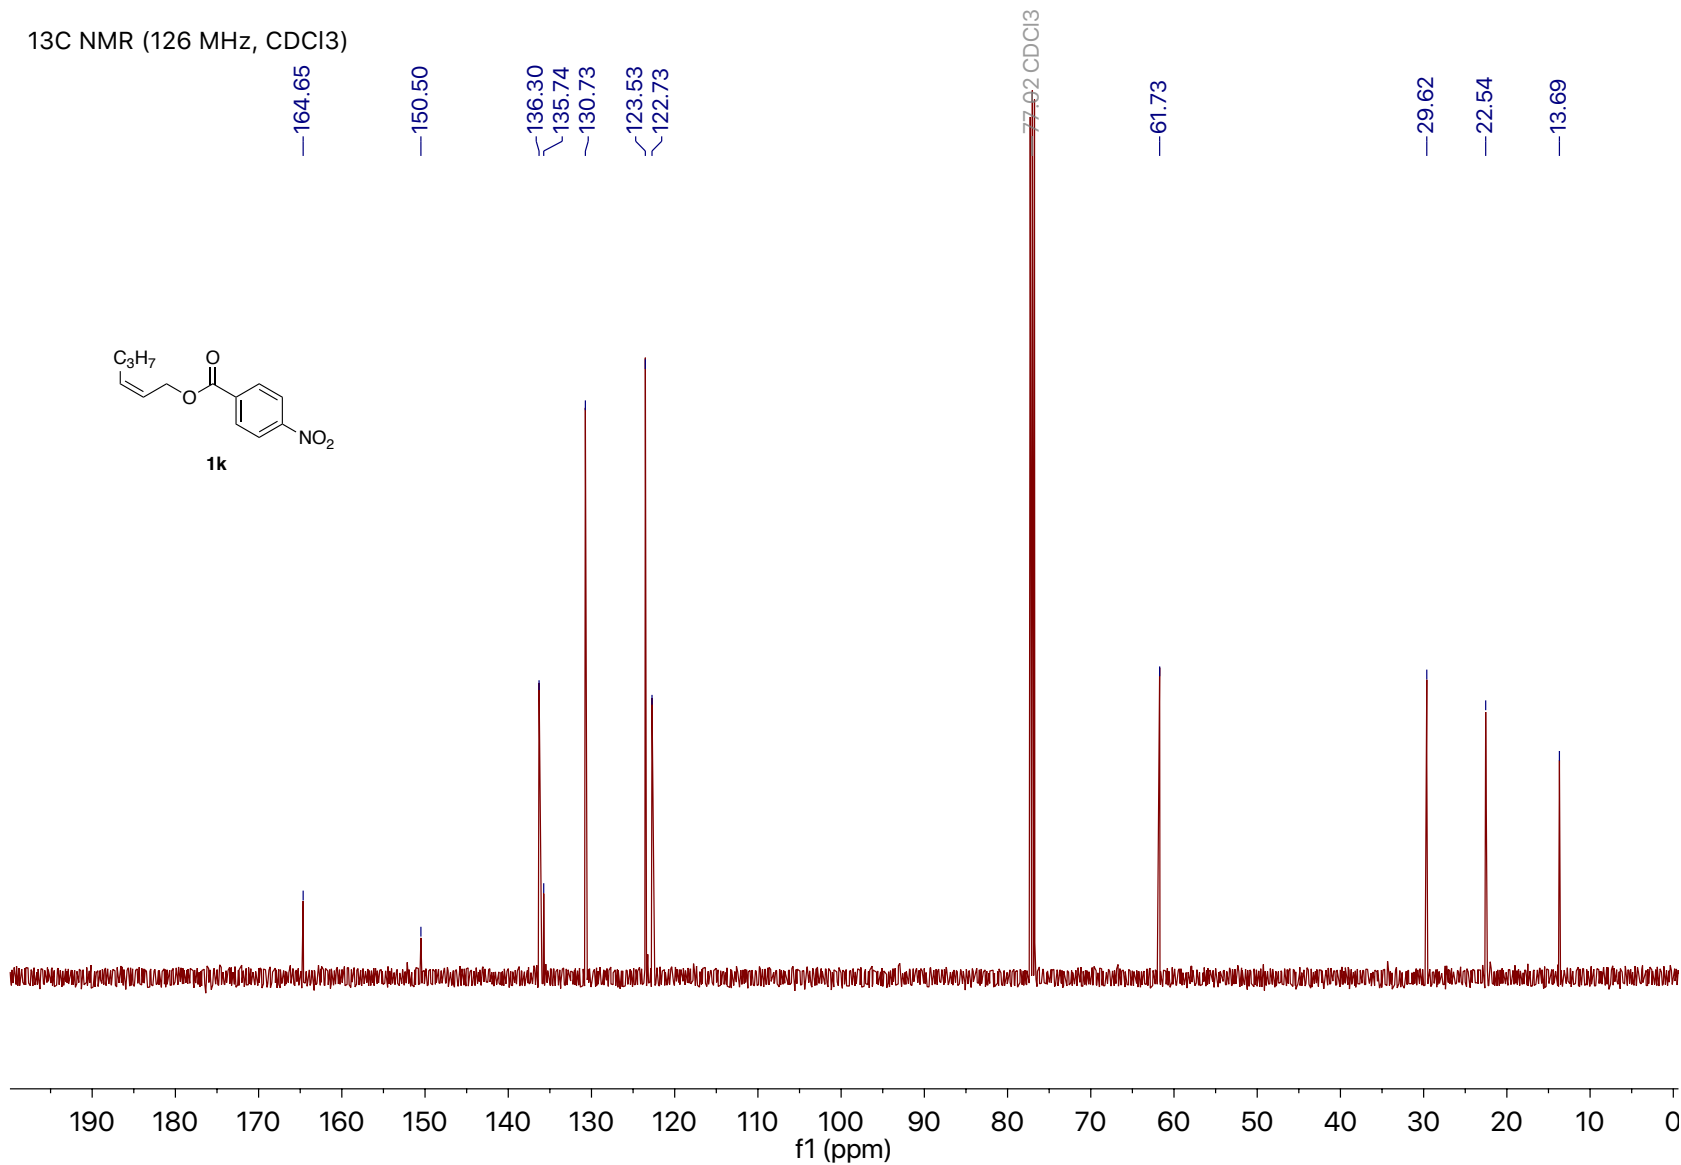

1H NMR (500 MHz, CDCl3)

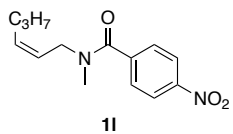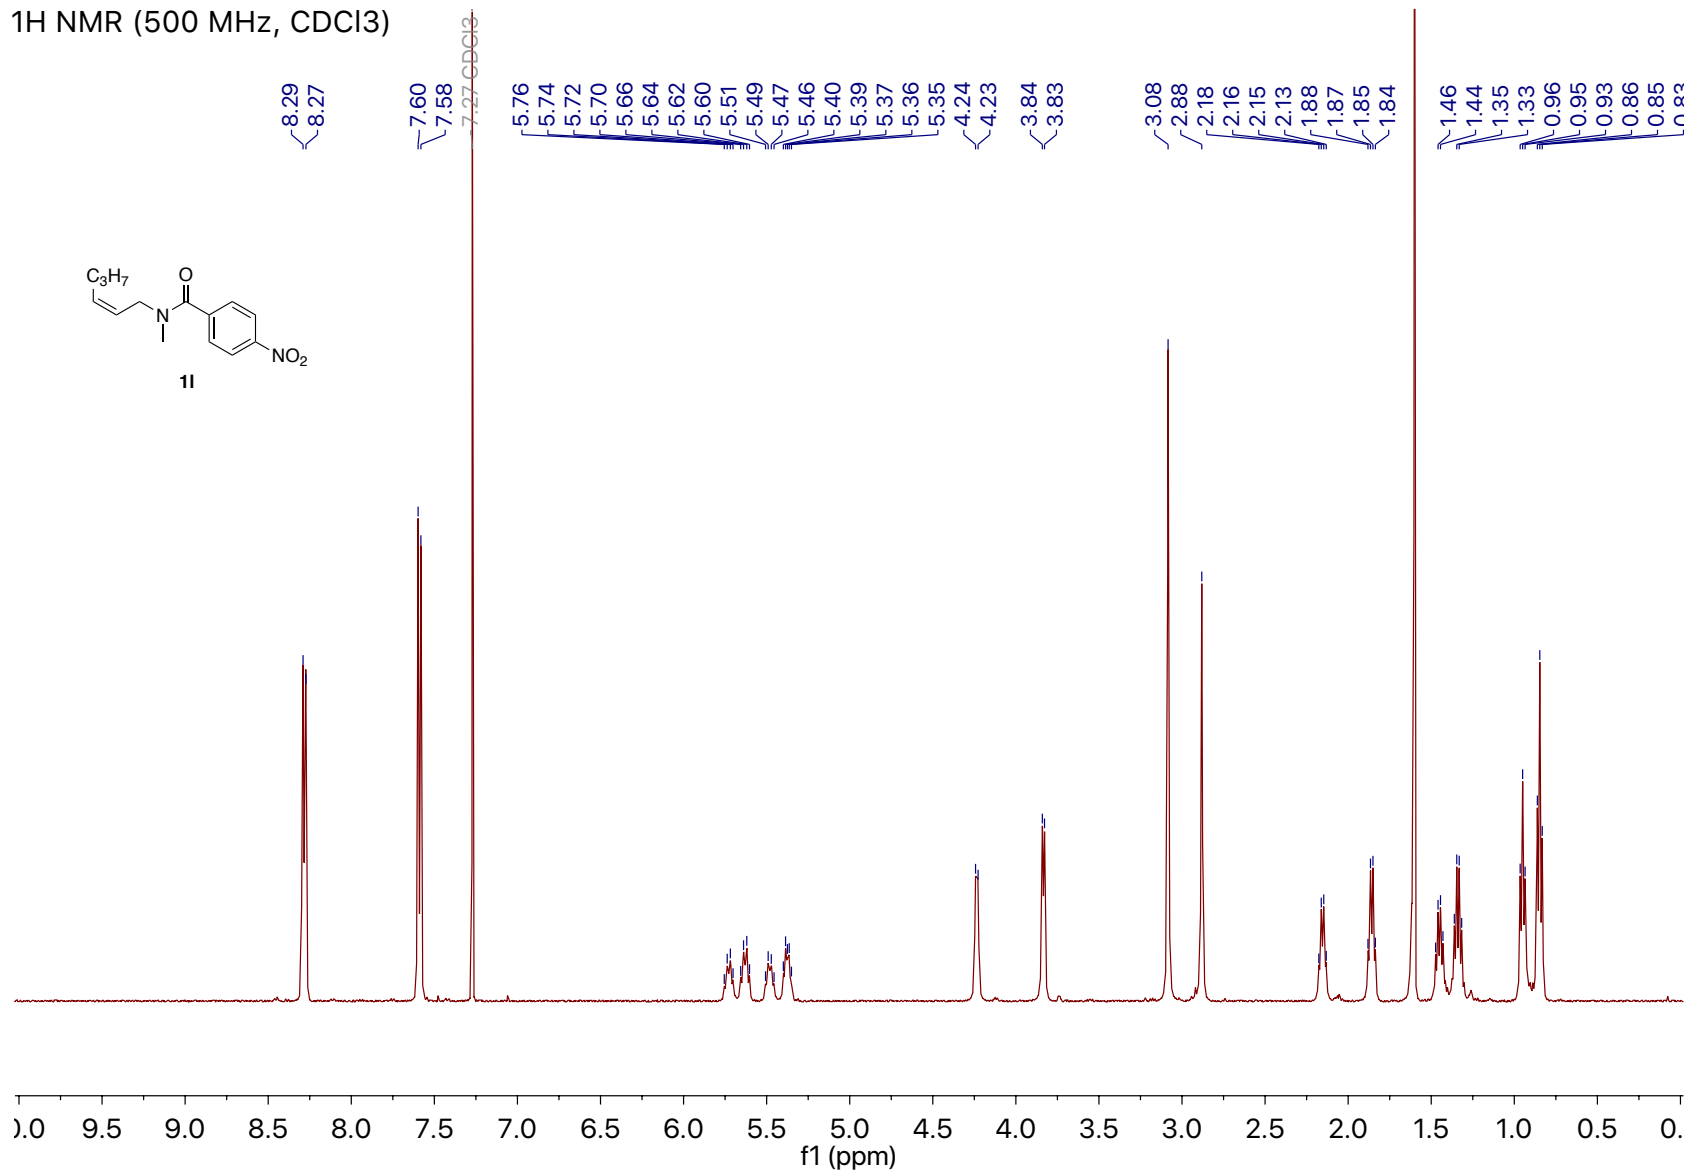

<sup>13</sup>C NMR (126 MHz, CDCl<sub>3</sub>)

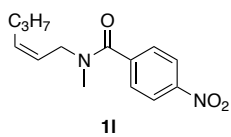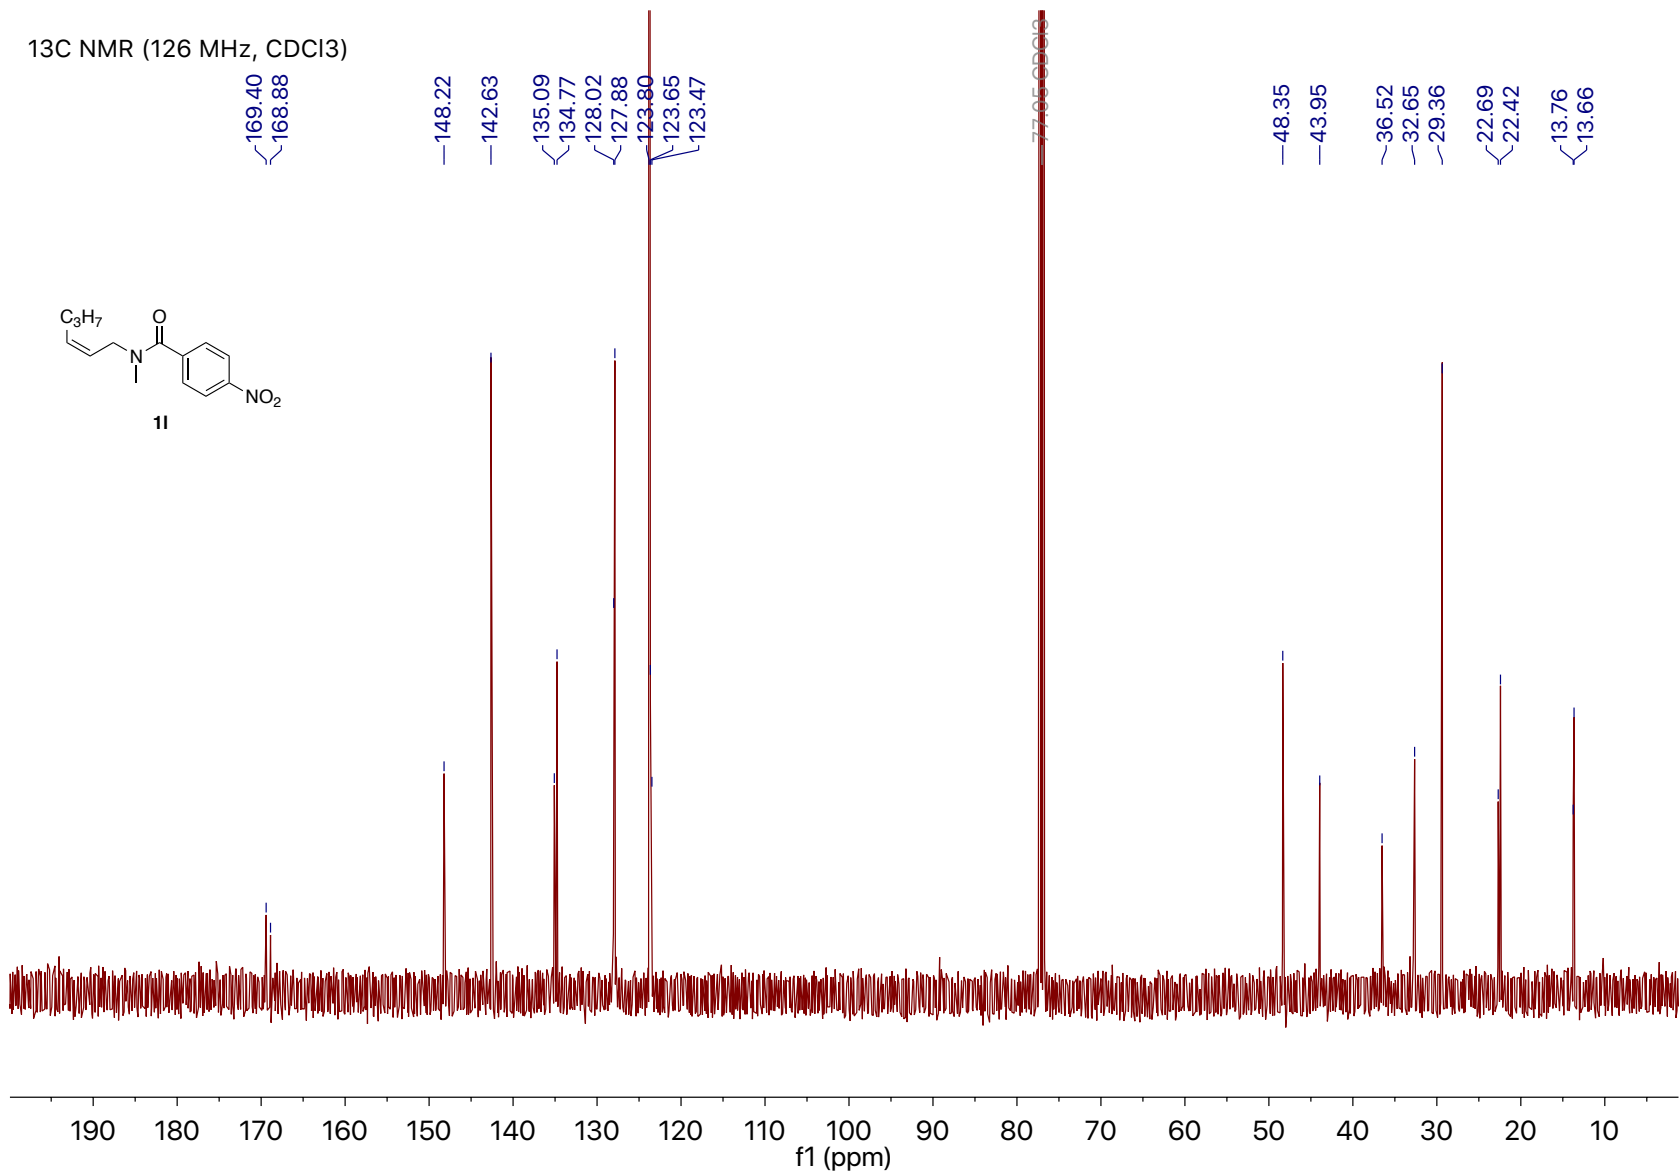



1H NMR (500 MHz, CDCl3)

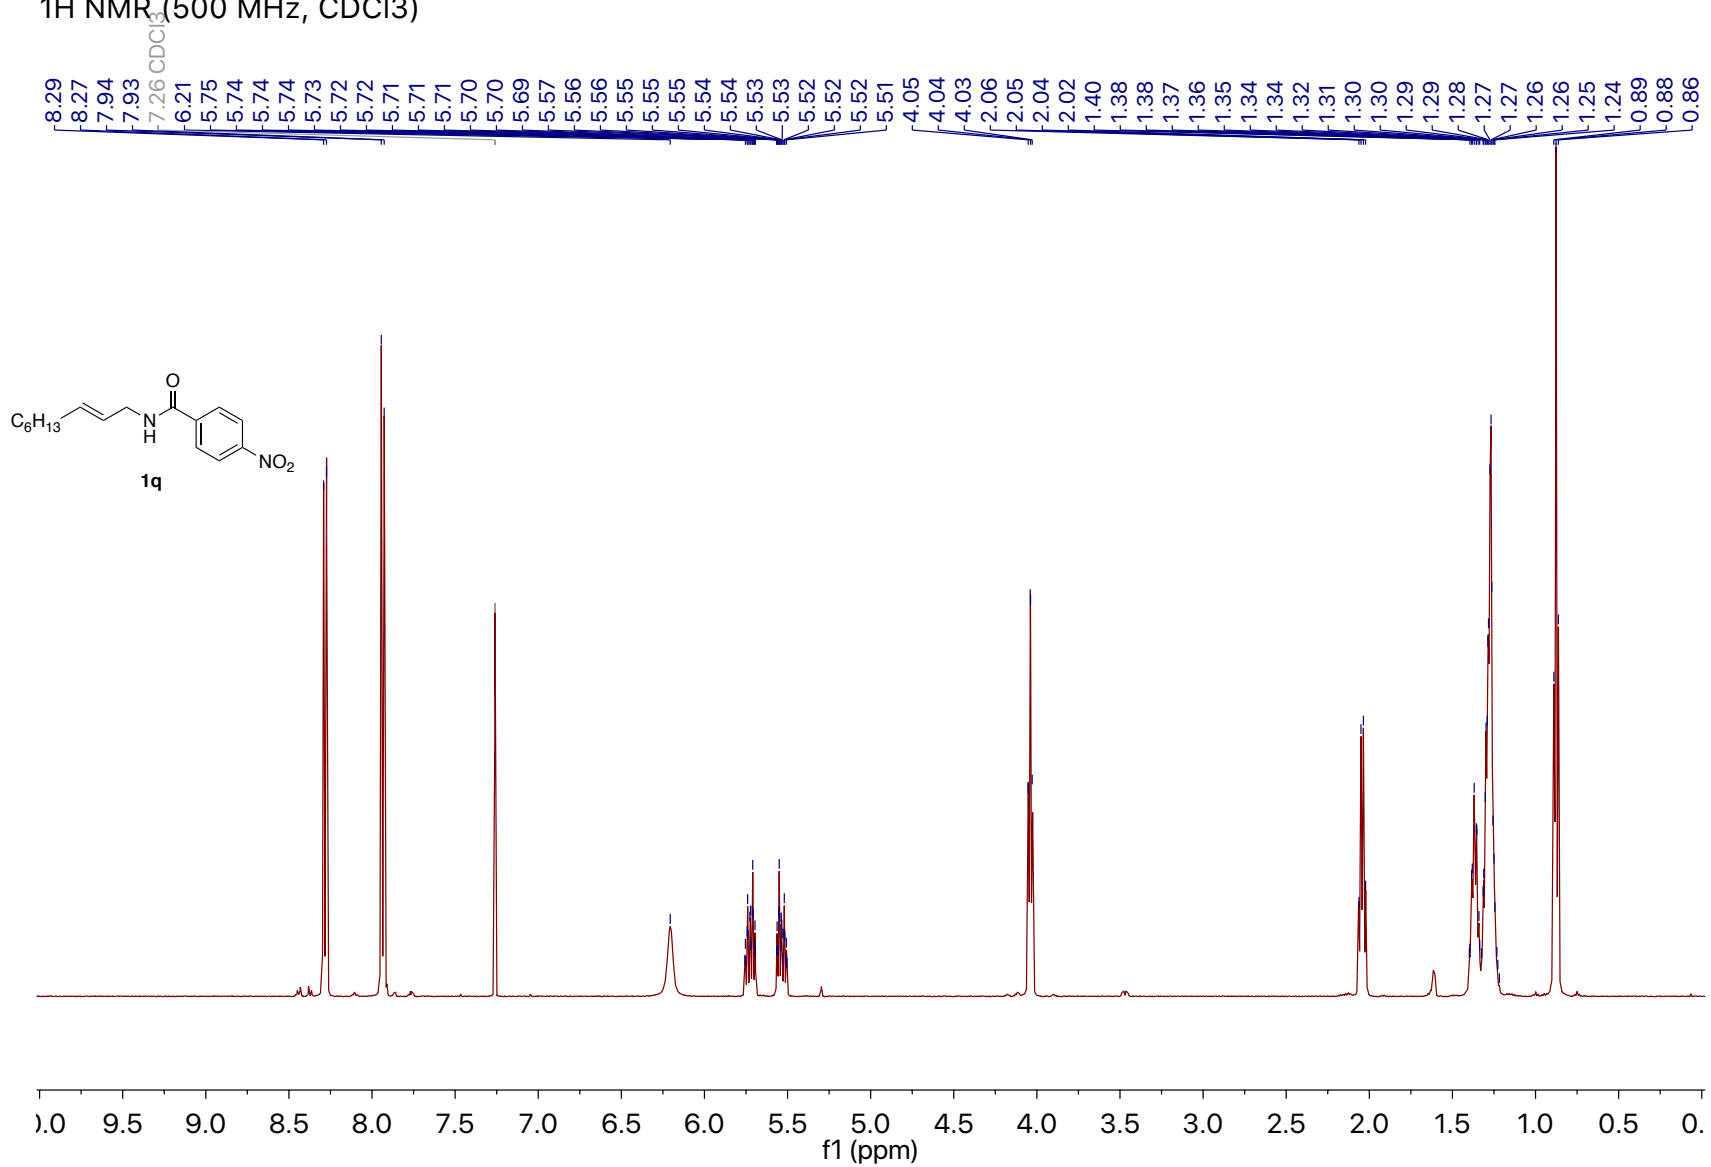

<sup>13</sup>C NMR (126 MHz, CDCl<sub>3</sub>)

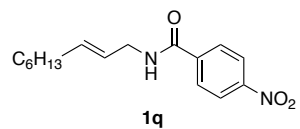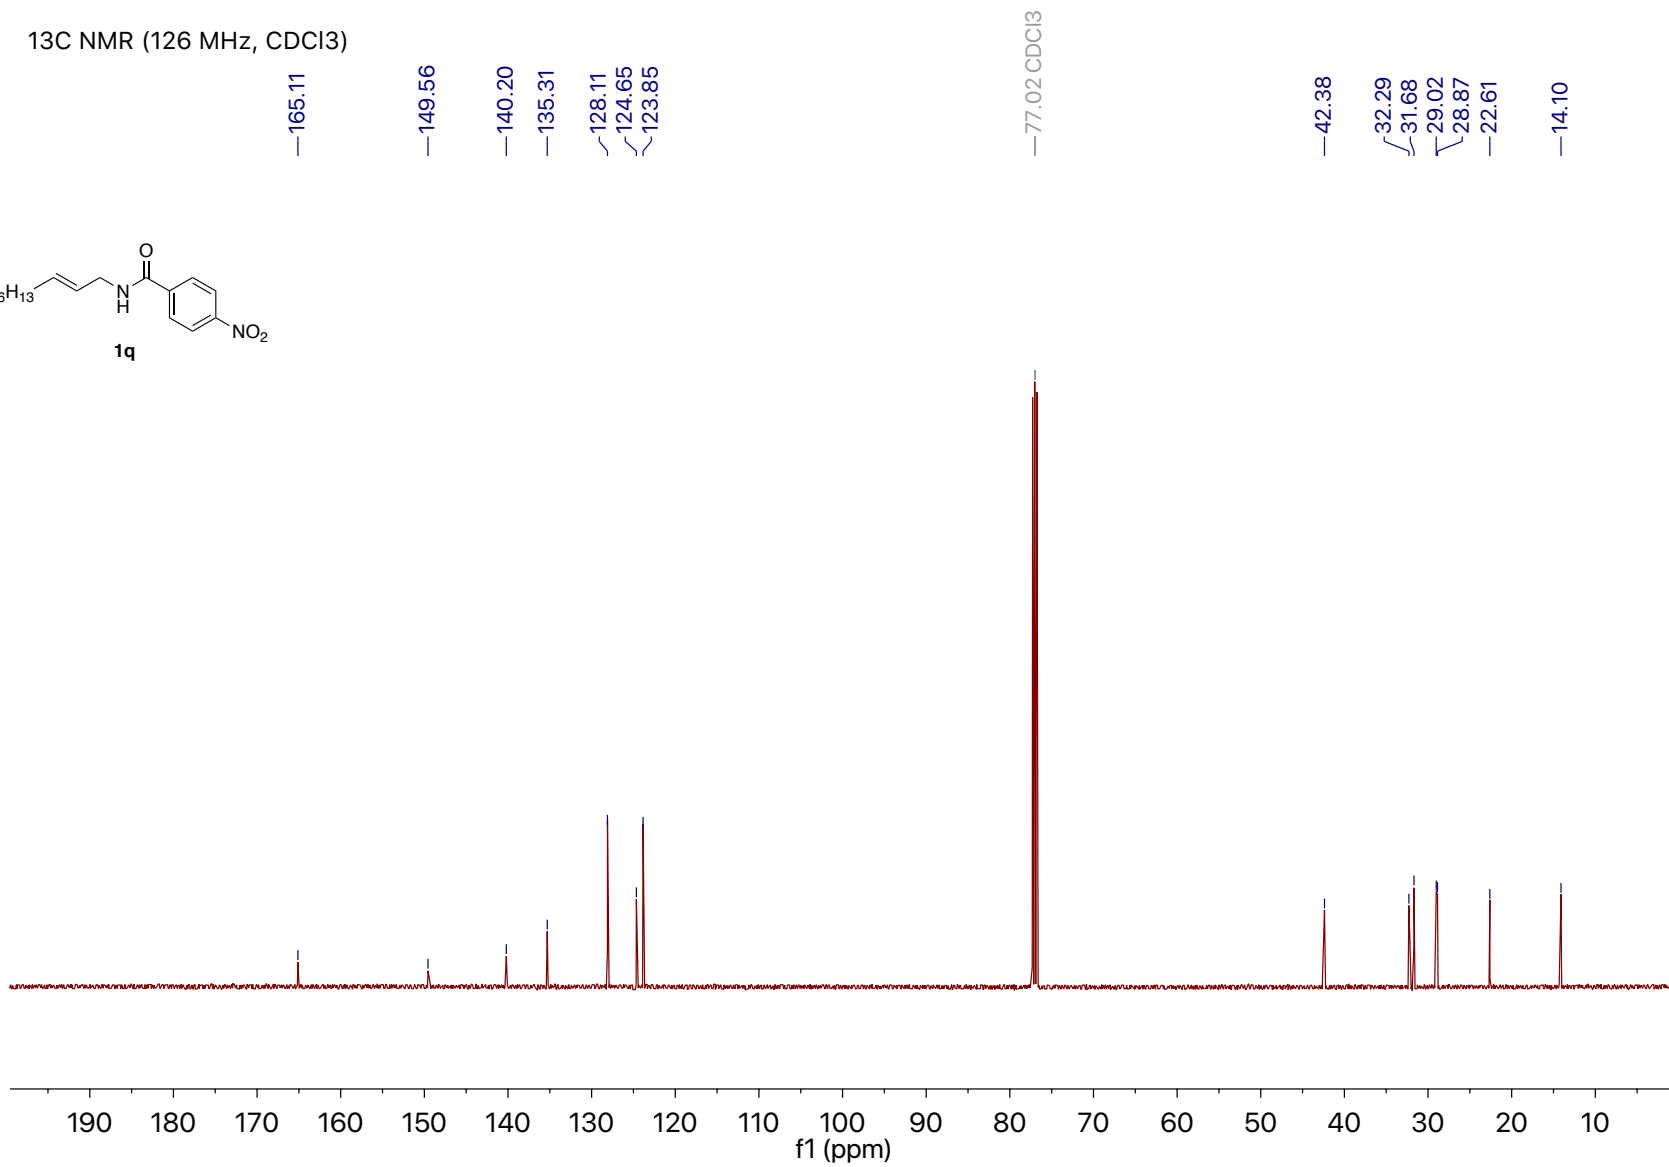

<sup>1</sup>H NMR (500 MHz, CDCl<sub>3</sub>)

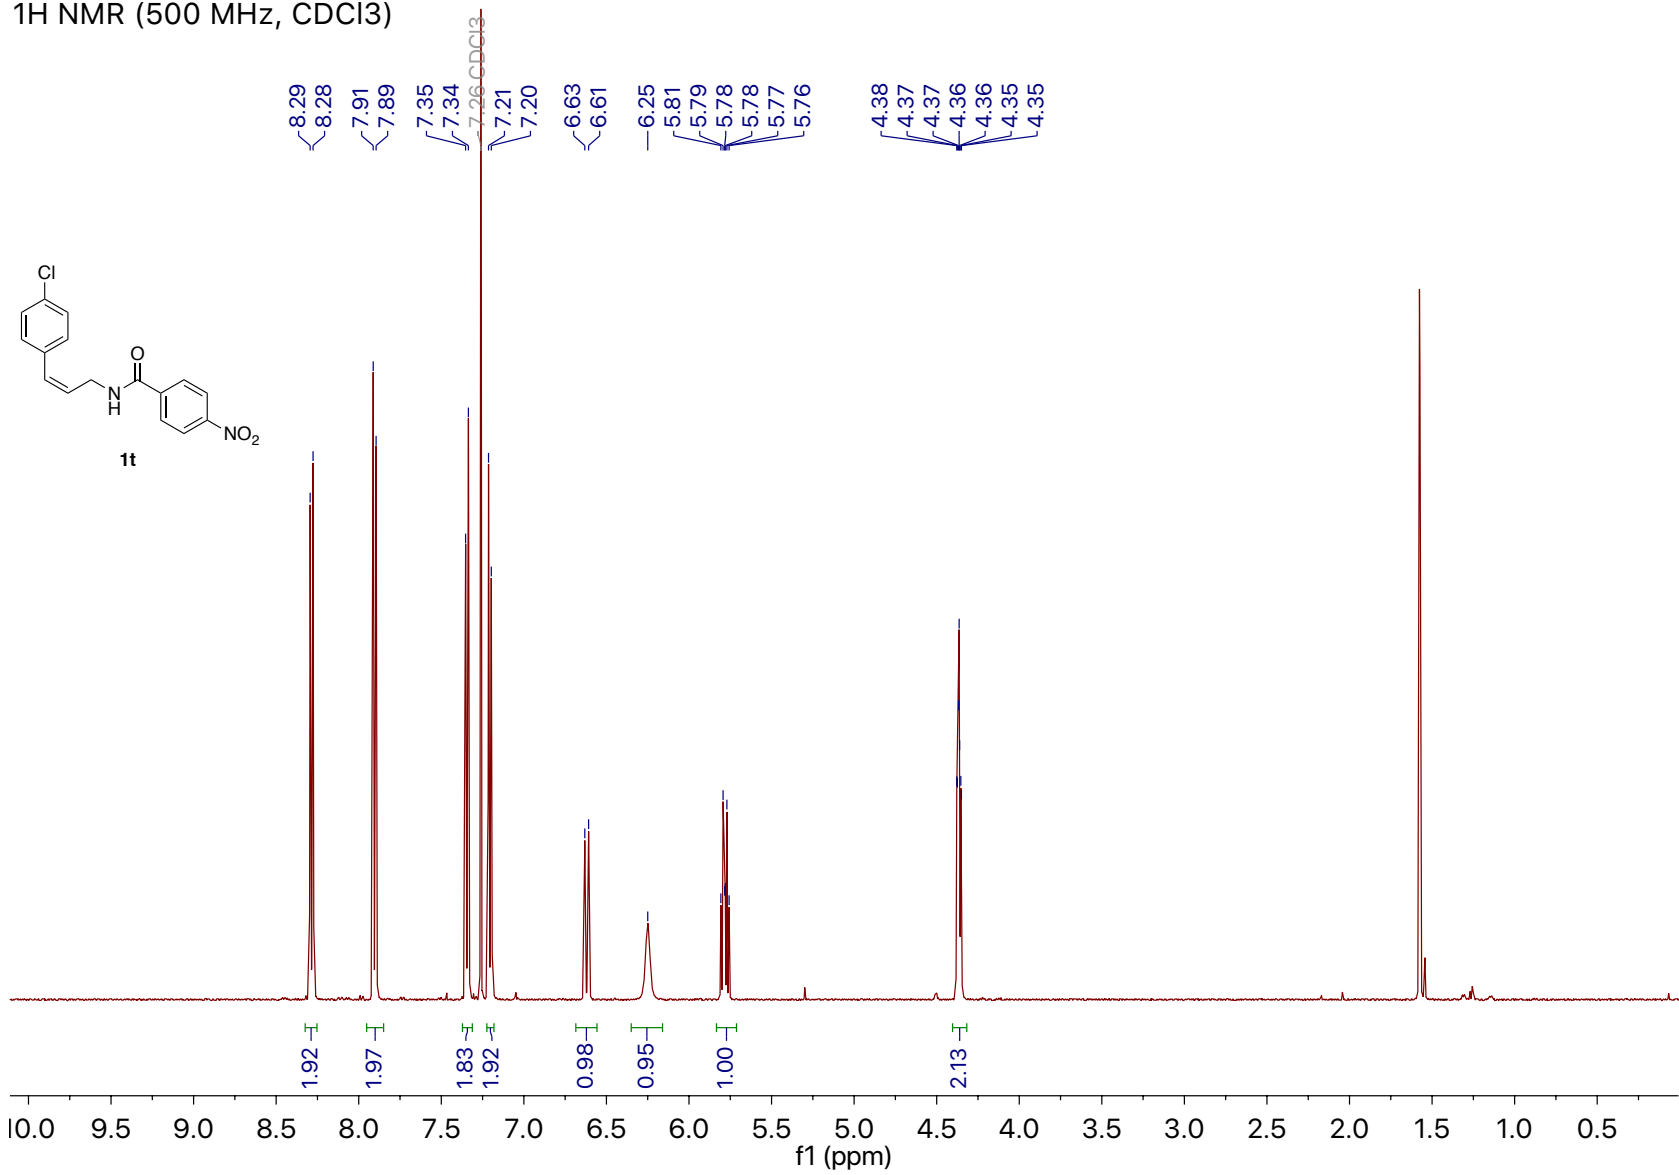

<sup>13</sup>C NMR (126 MHz, CDCl<sub>3</sub>)

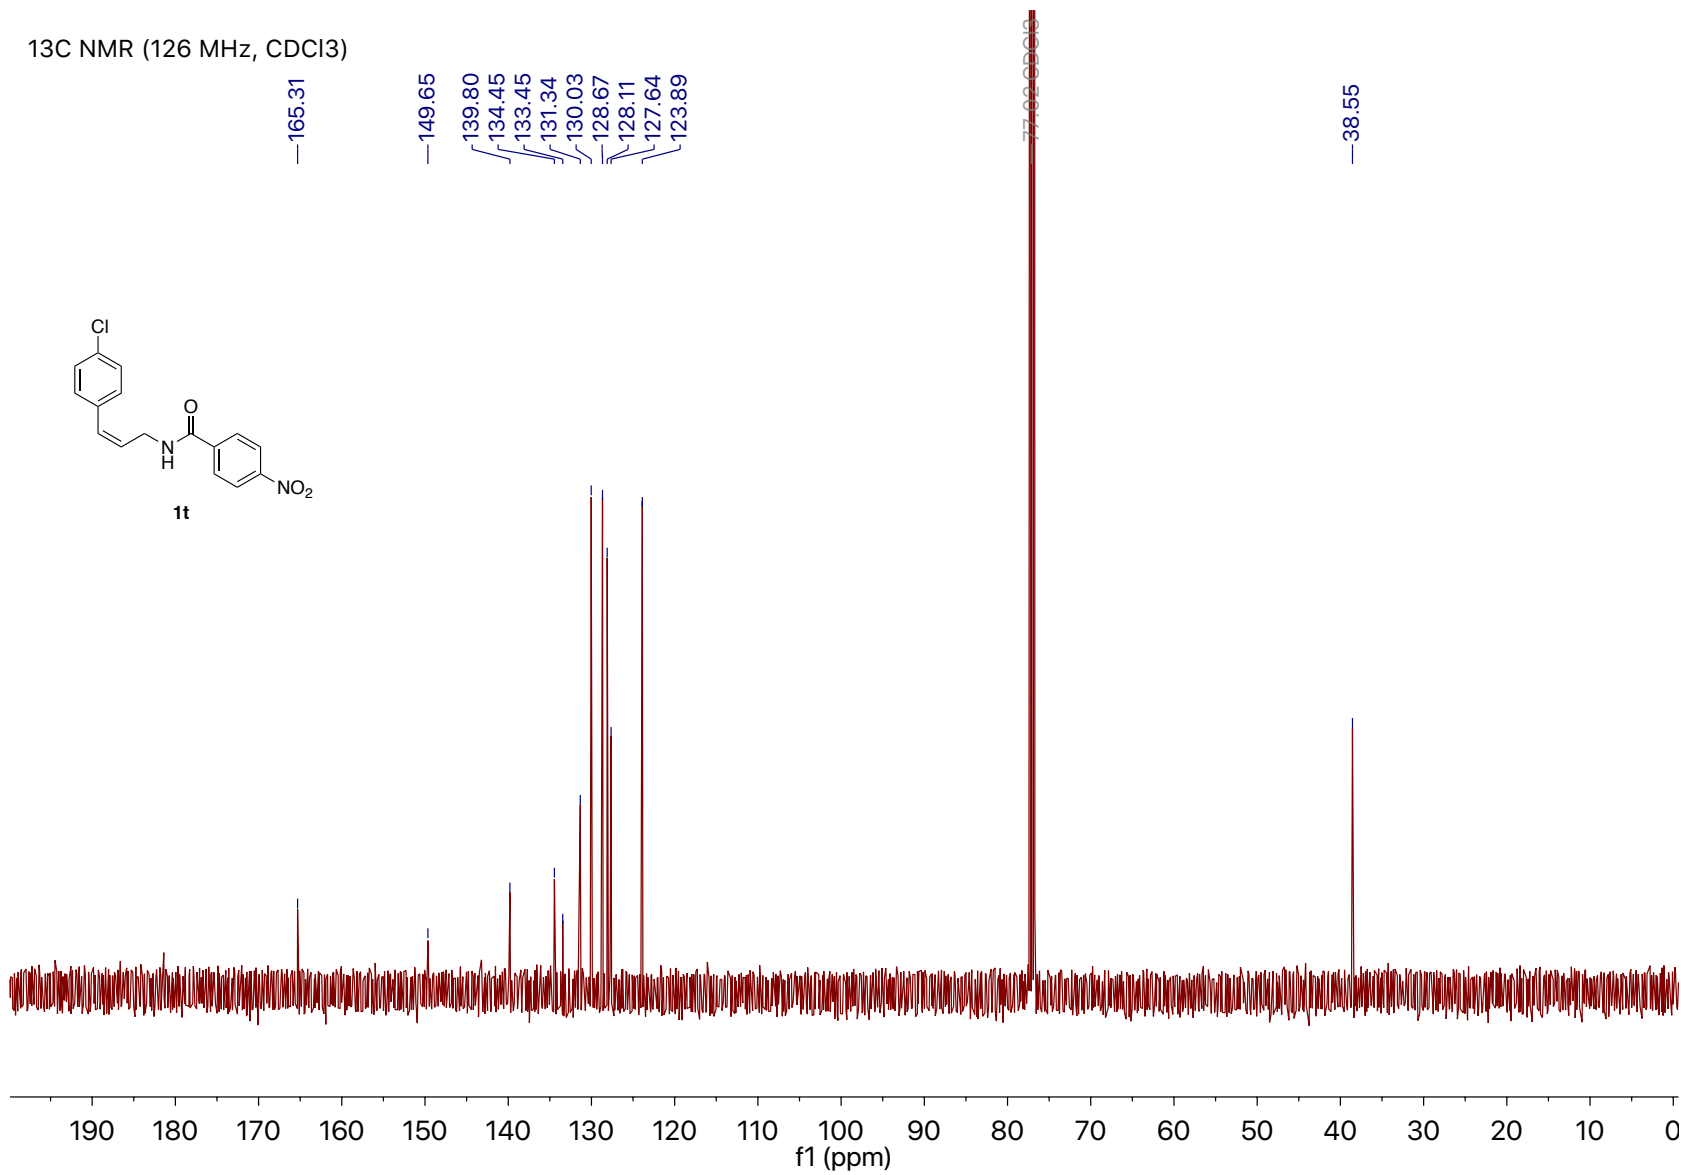

1H NMR (500 MHz, CDCl3)

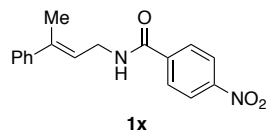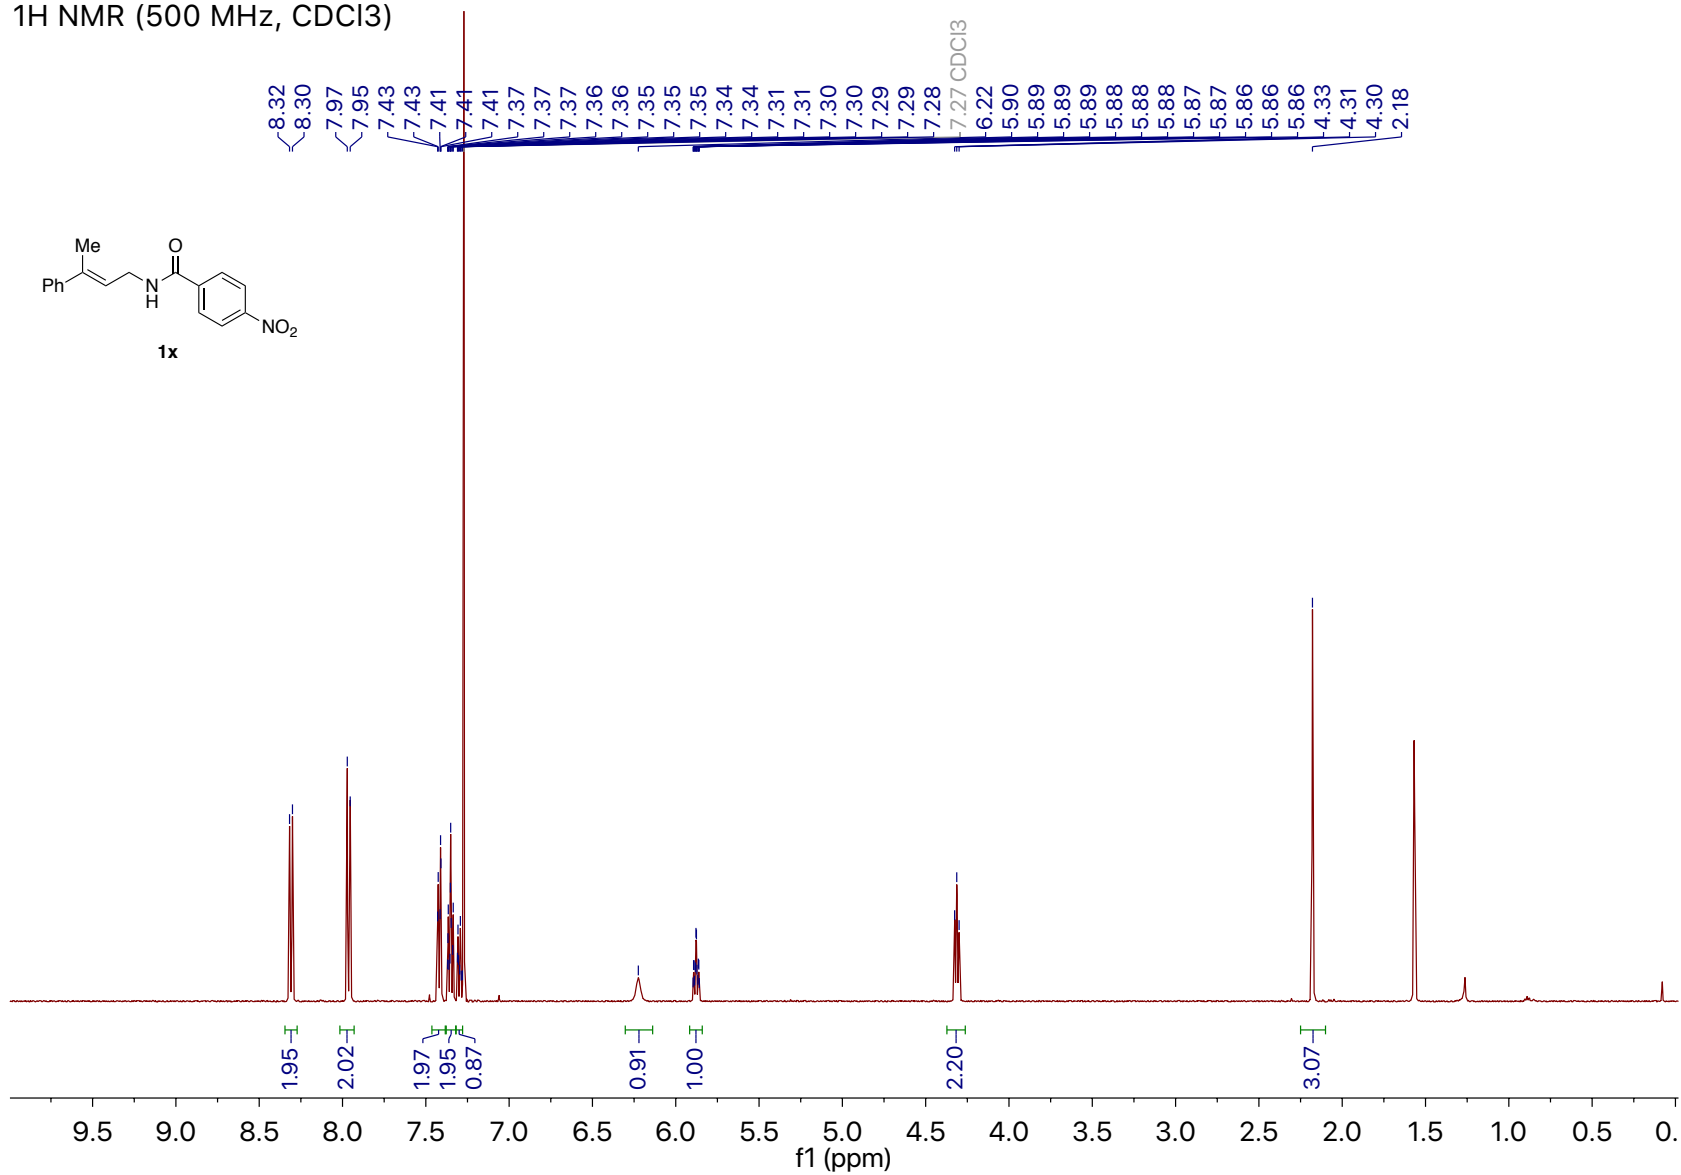

<sup>13</sup>C NMR (126 MHz, CDCl<sub>3</sub>)

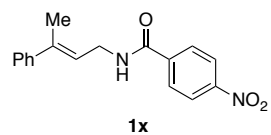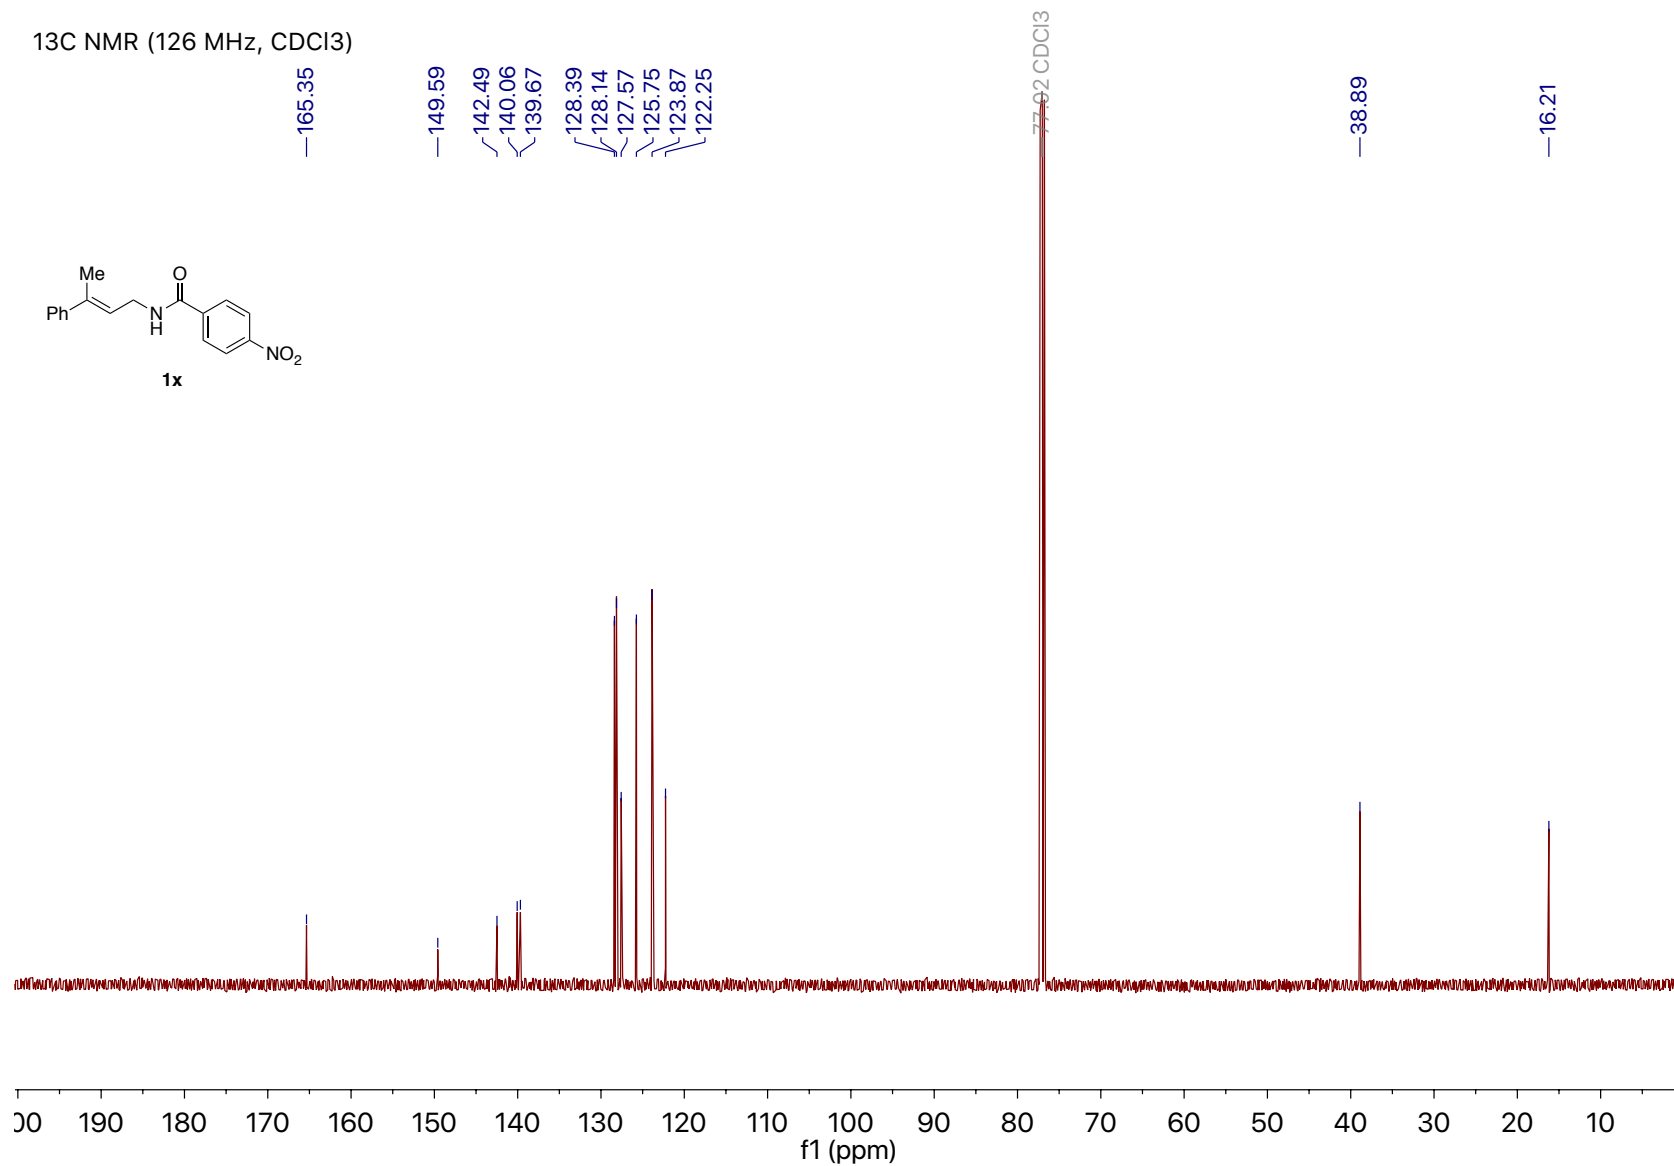

1H NMR (500 MHz, CDCl3)

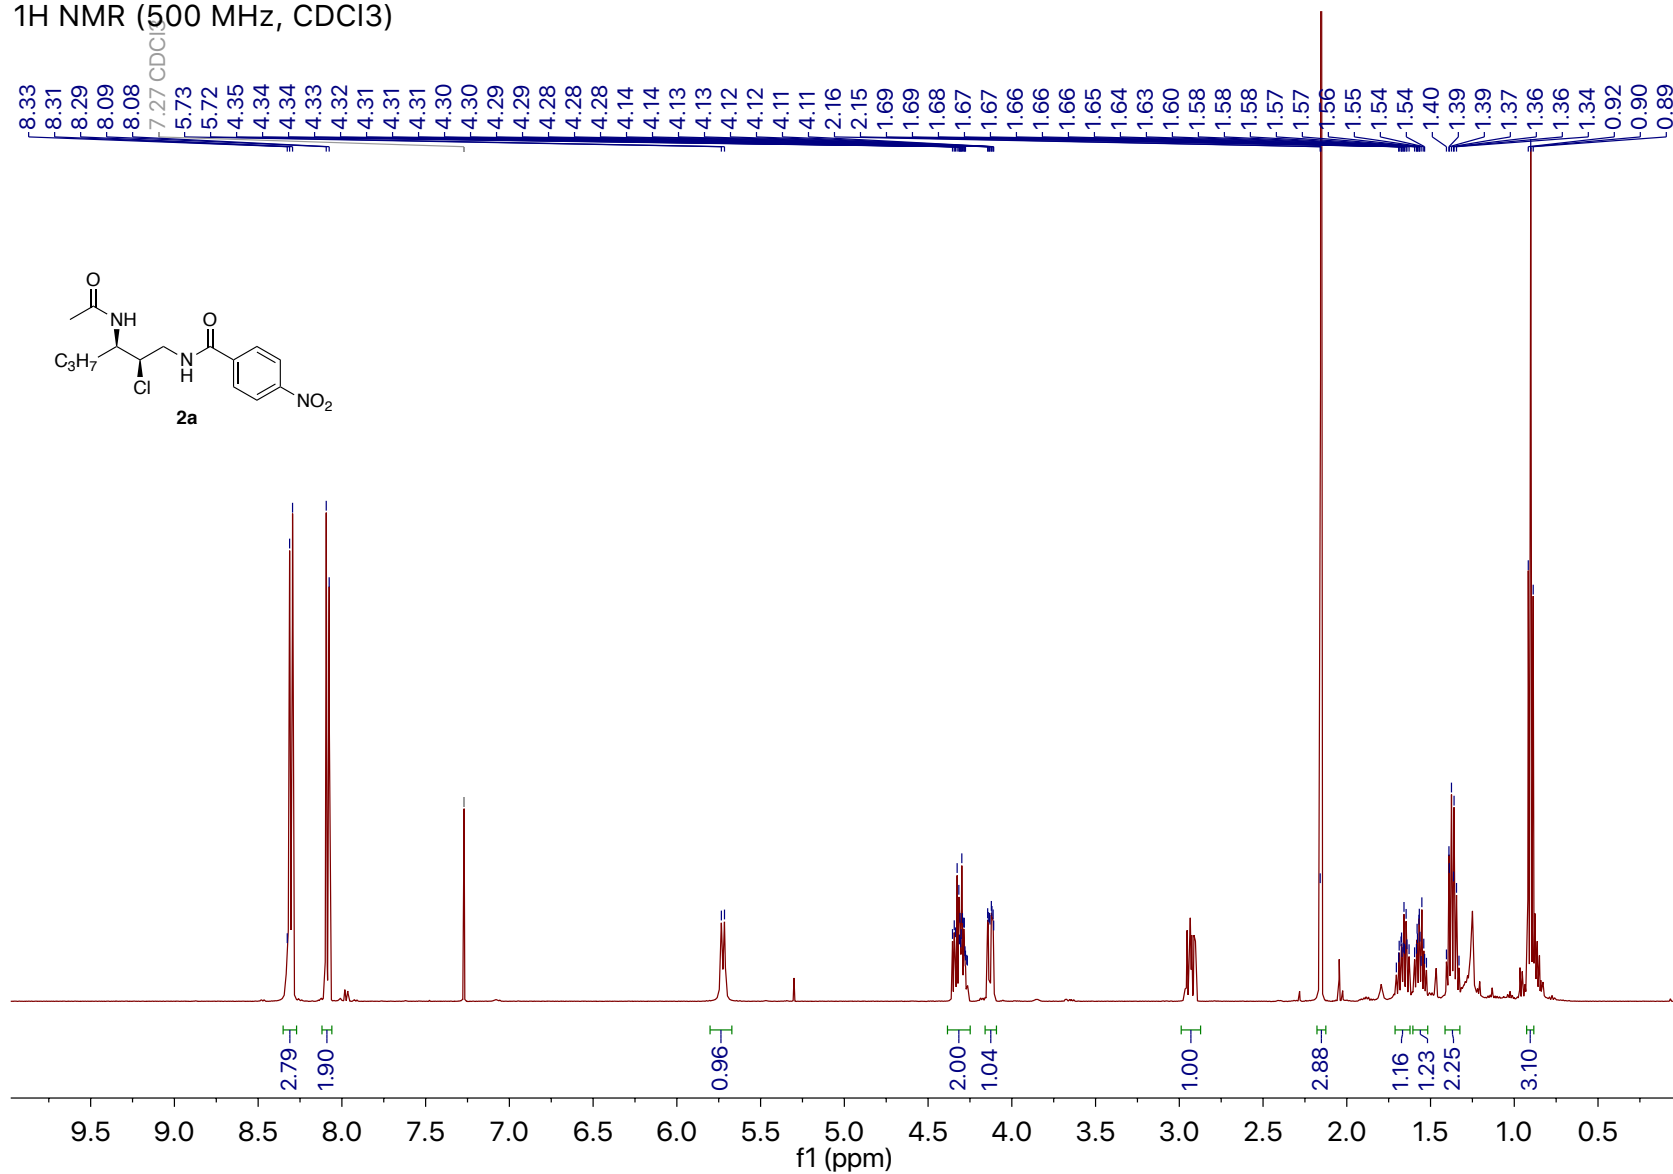

<sup>13</sup>C NMR (126 MHz, CDCl<sub>3</sub>)

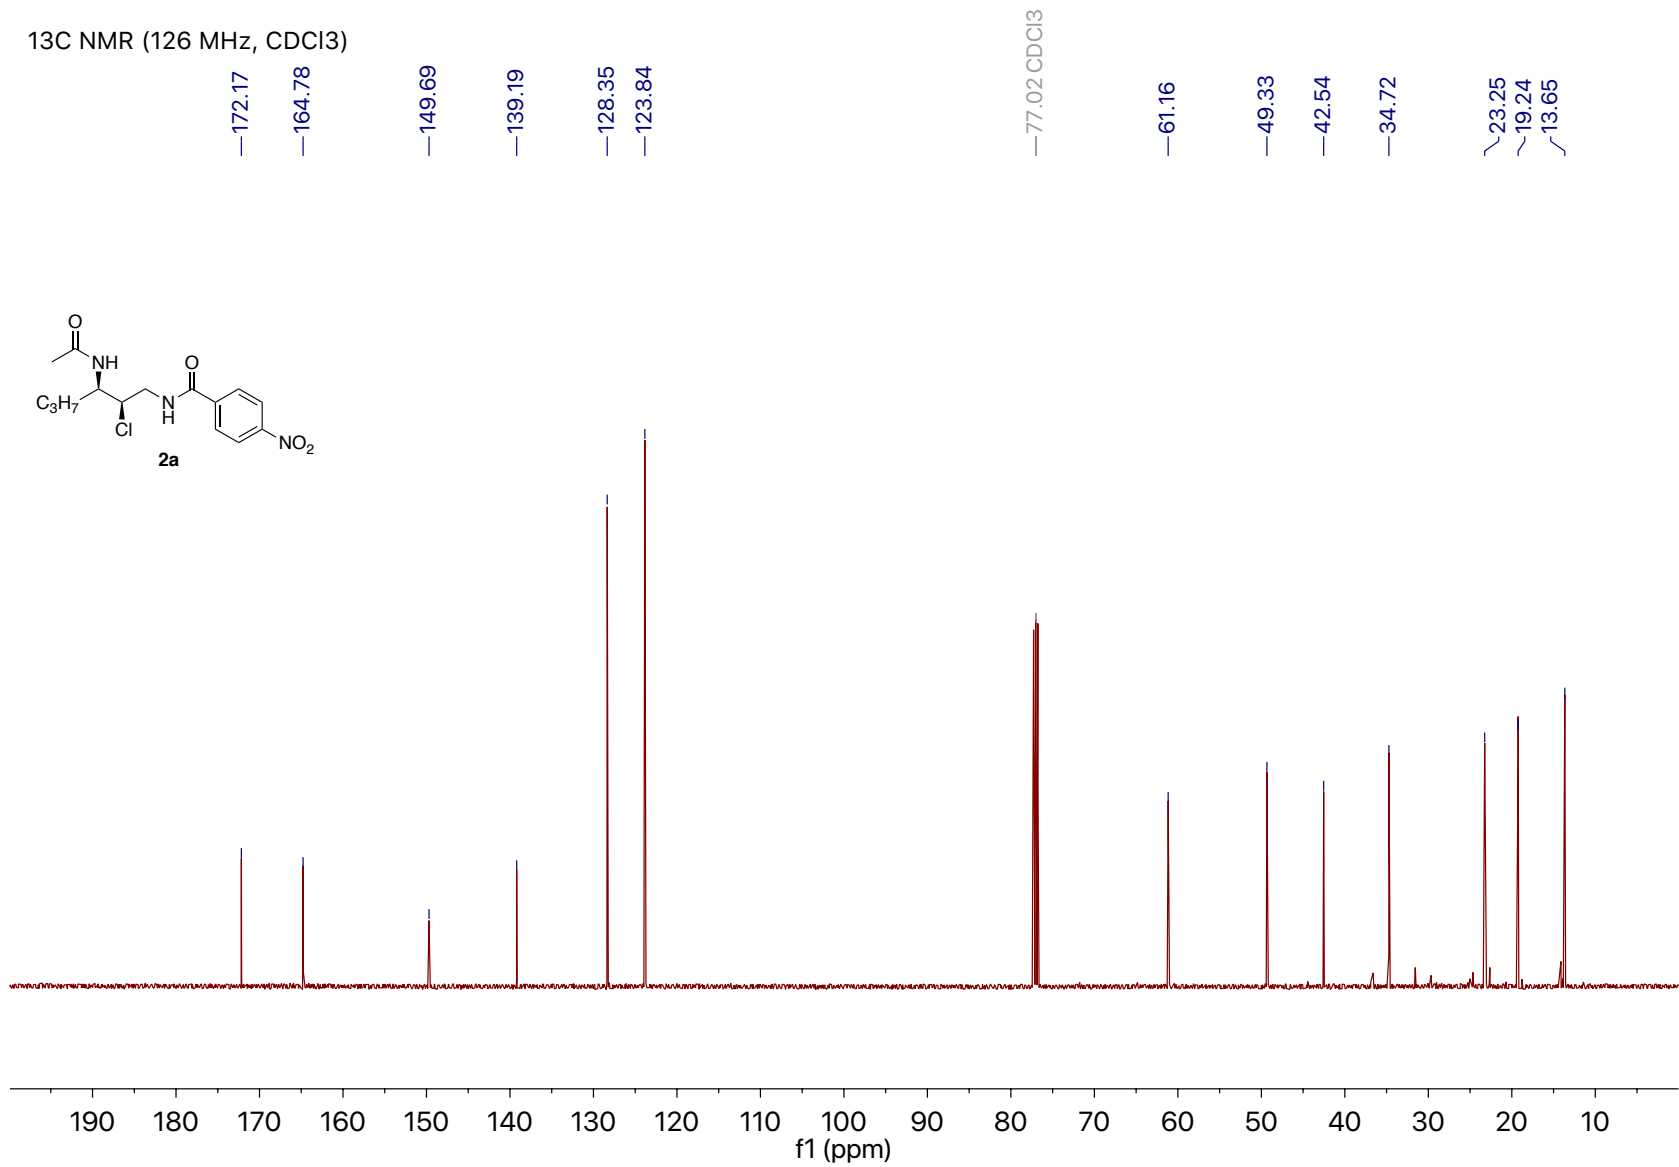



1H NMR (500 MHz, CDCl3)

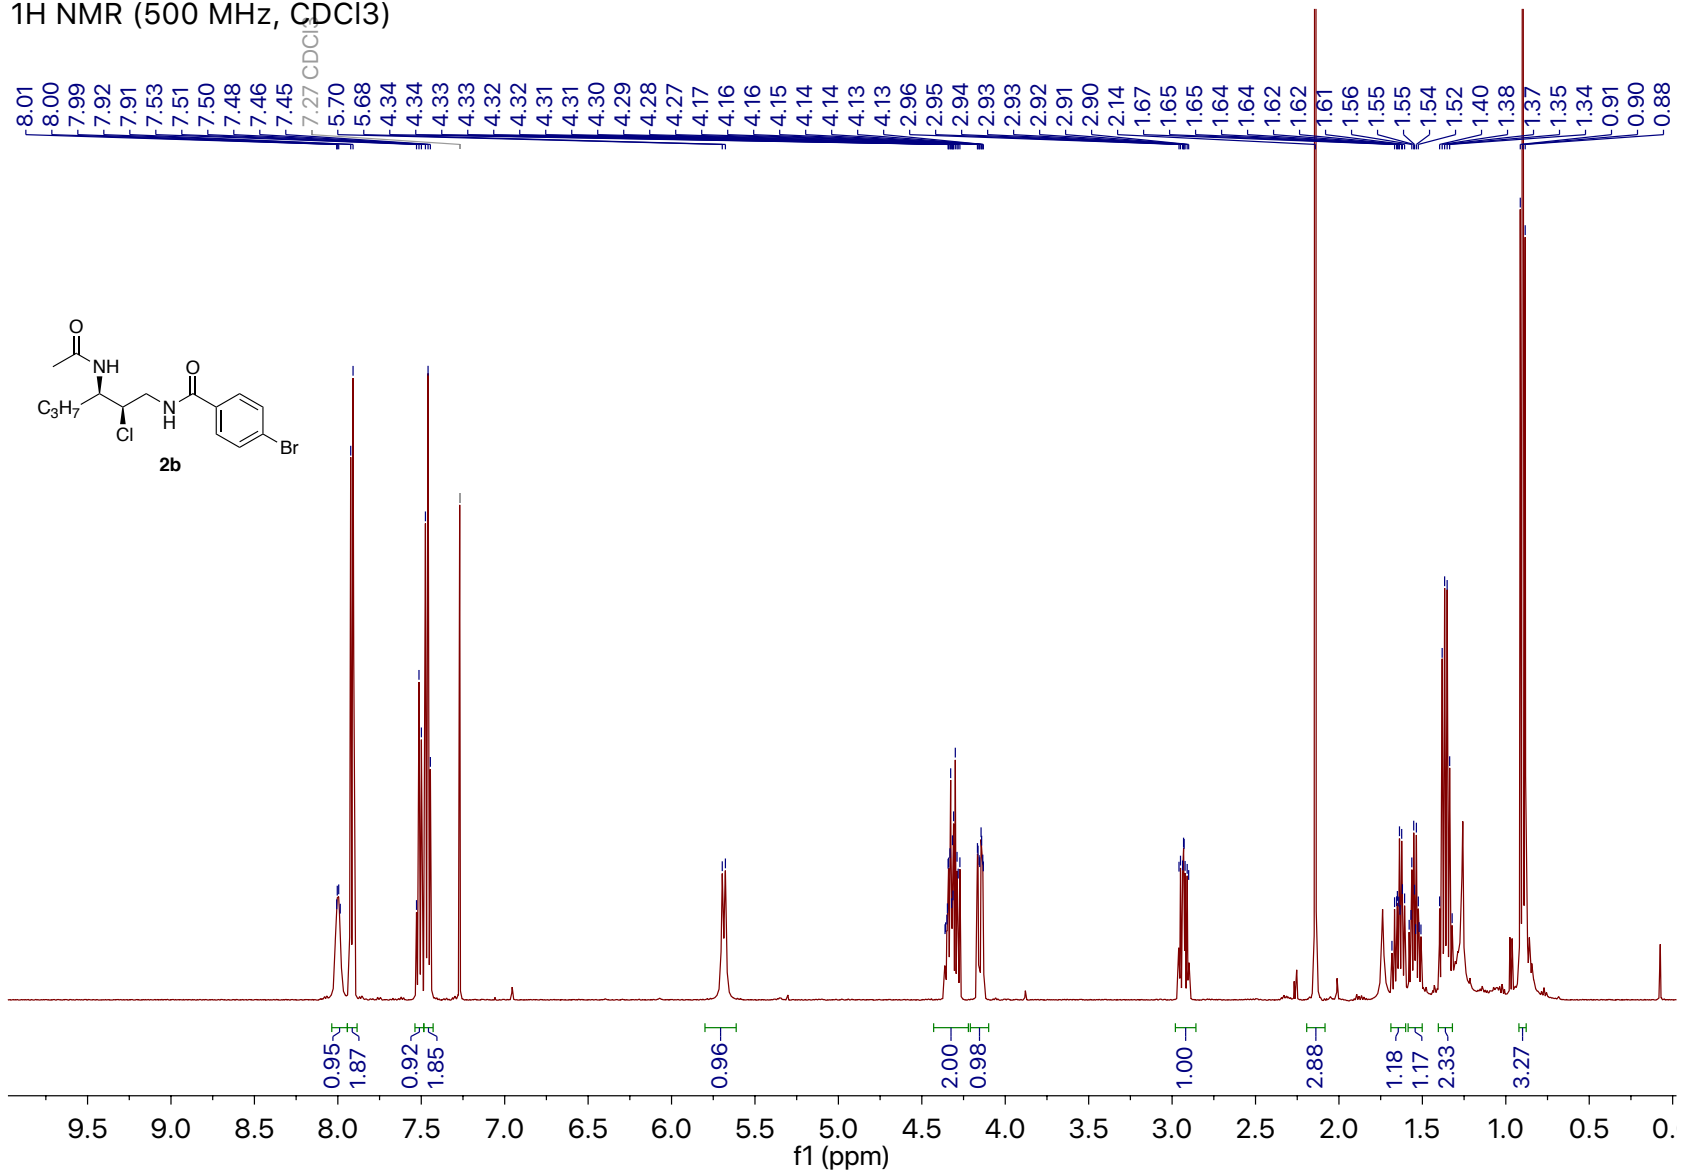

13C NMR (125 MHz, CDCl3)

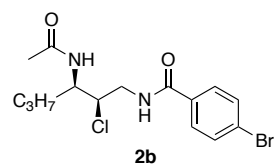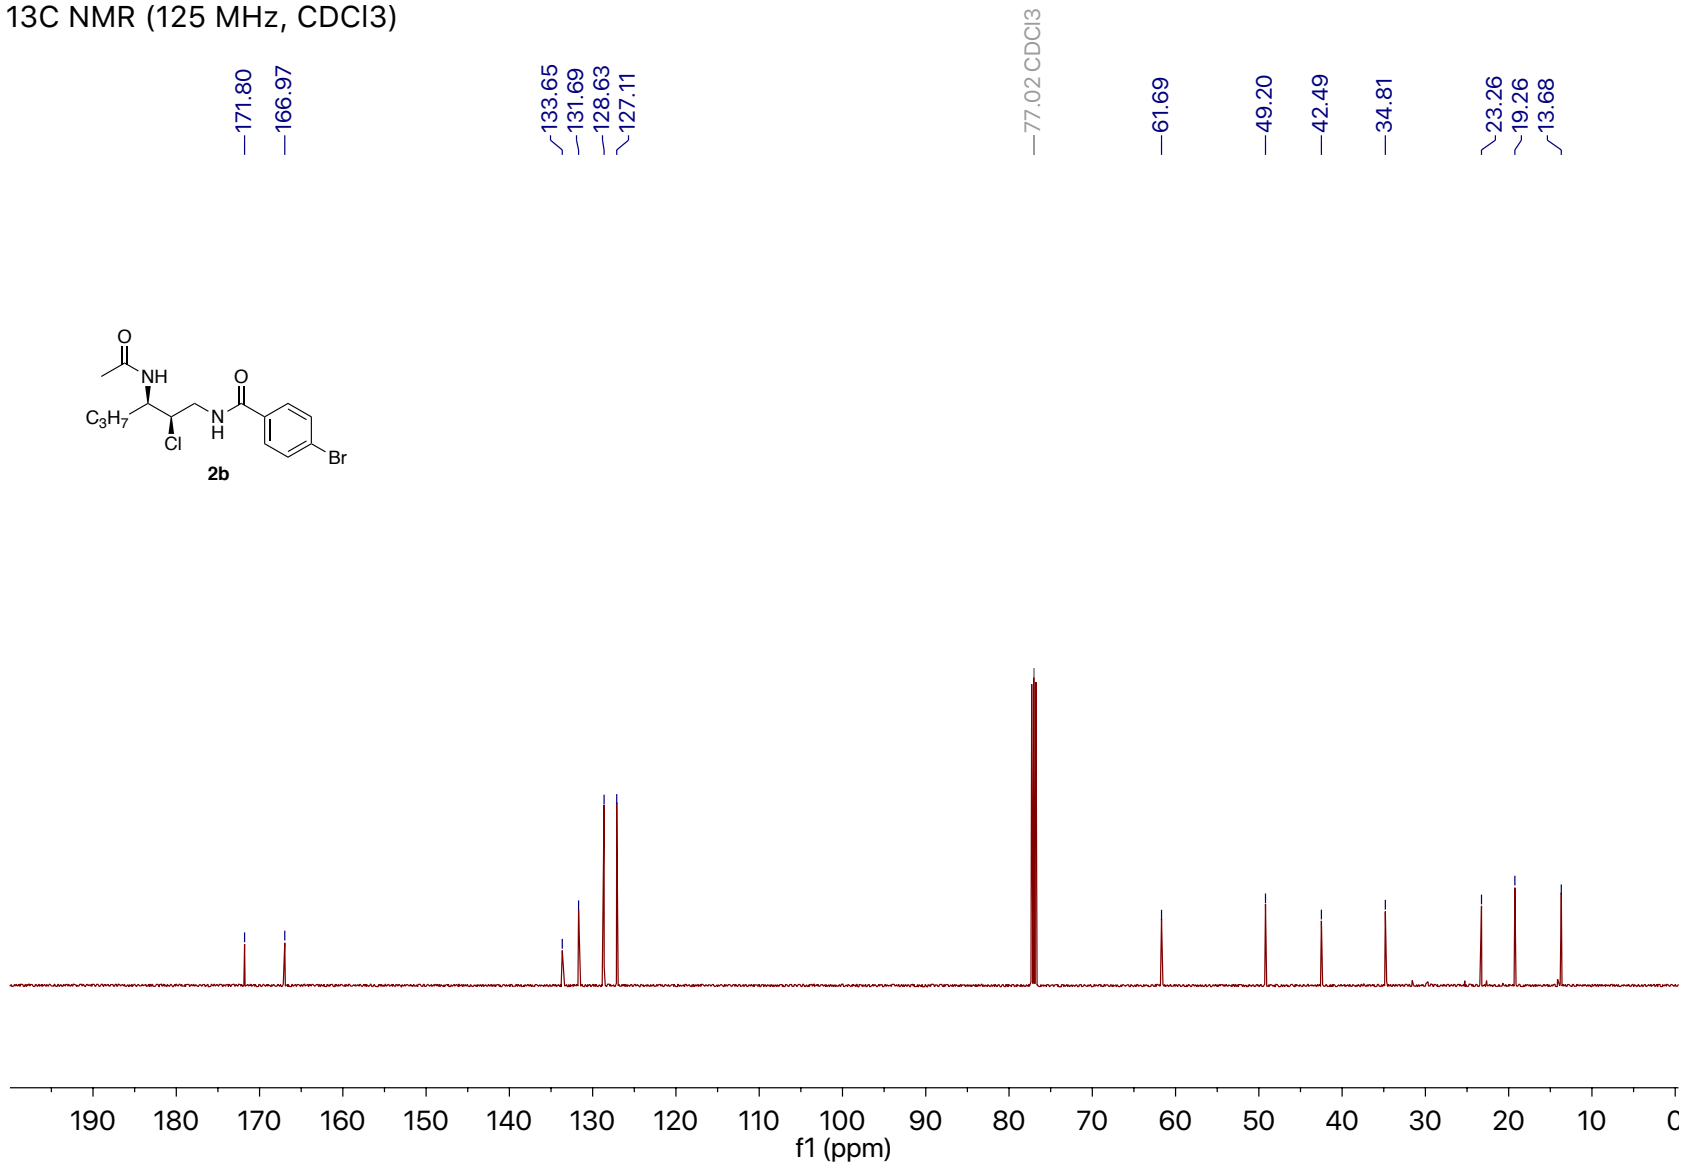

1H NMR (500 MHz, CDCl3)

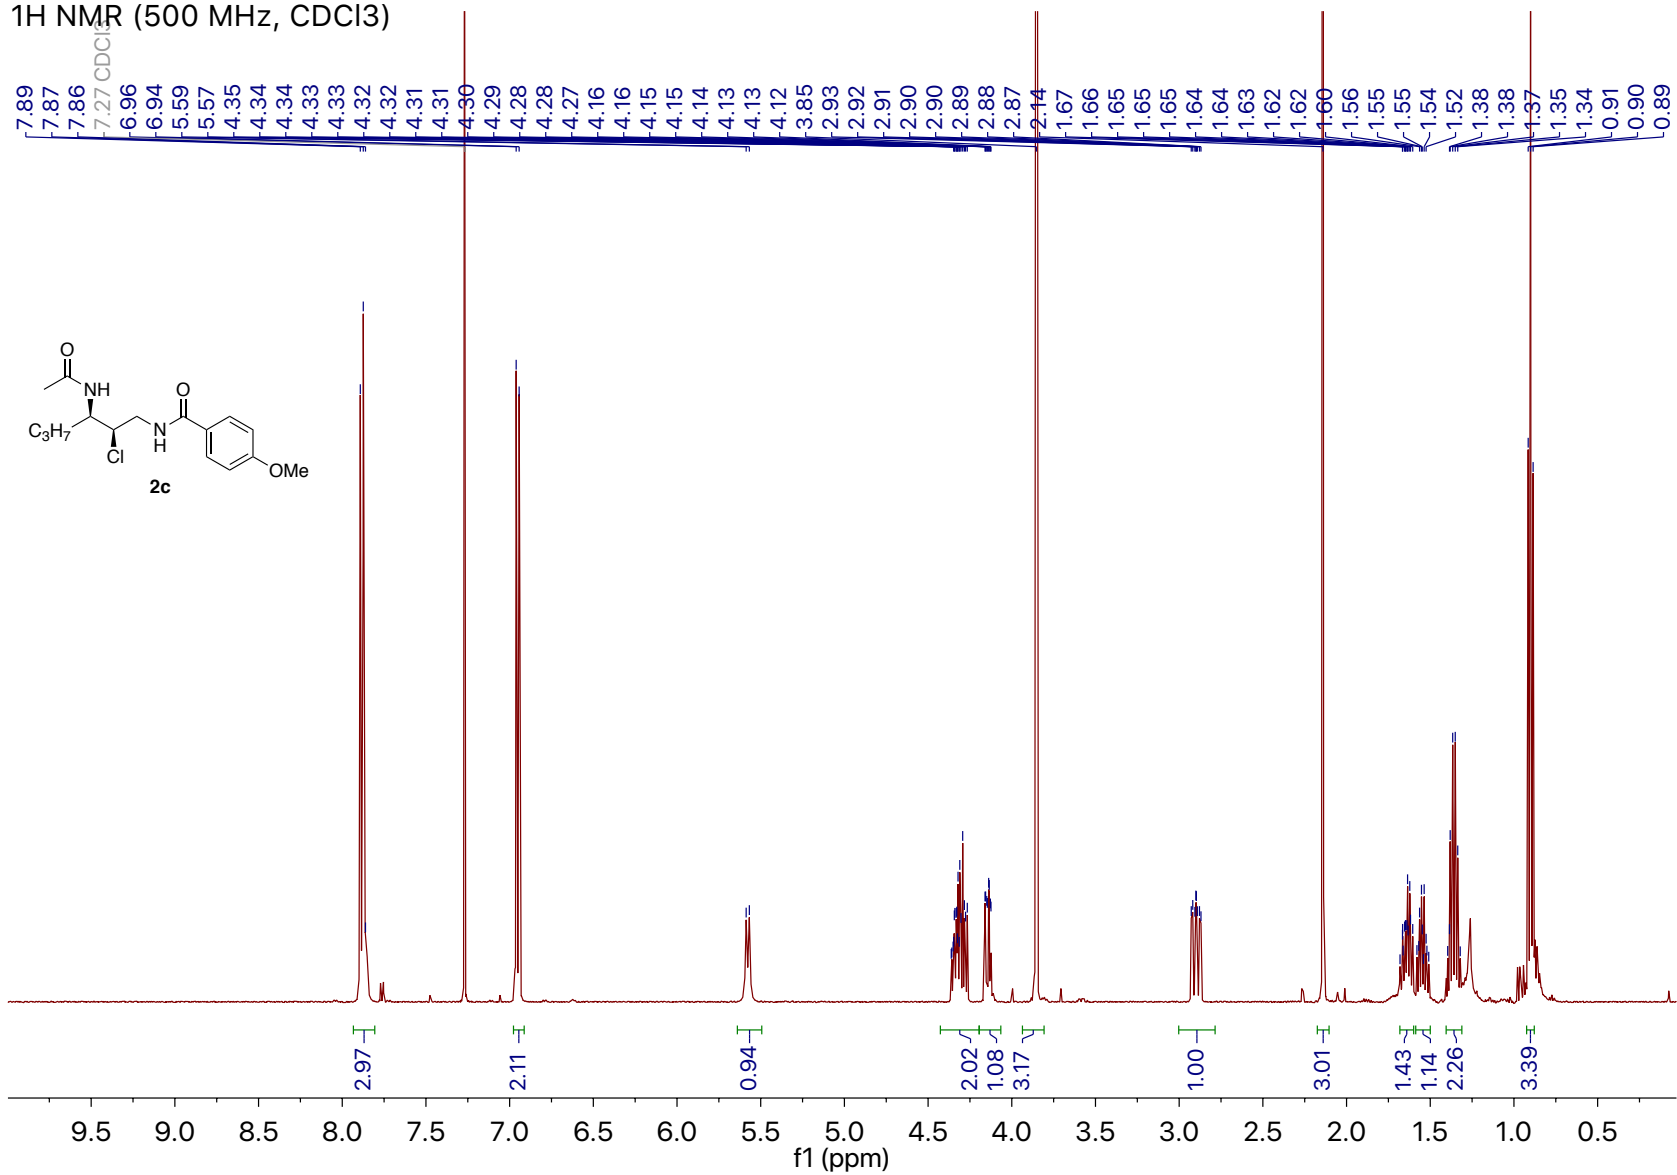

13C NMR (126 MHz, CDCl3)

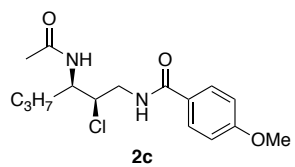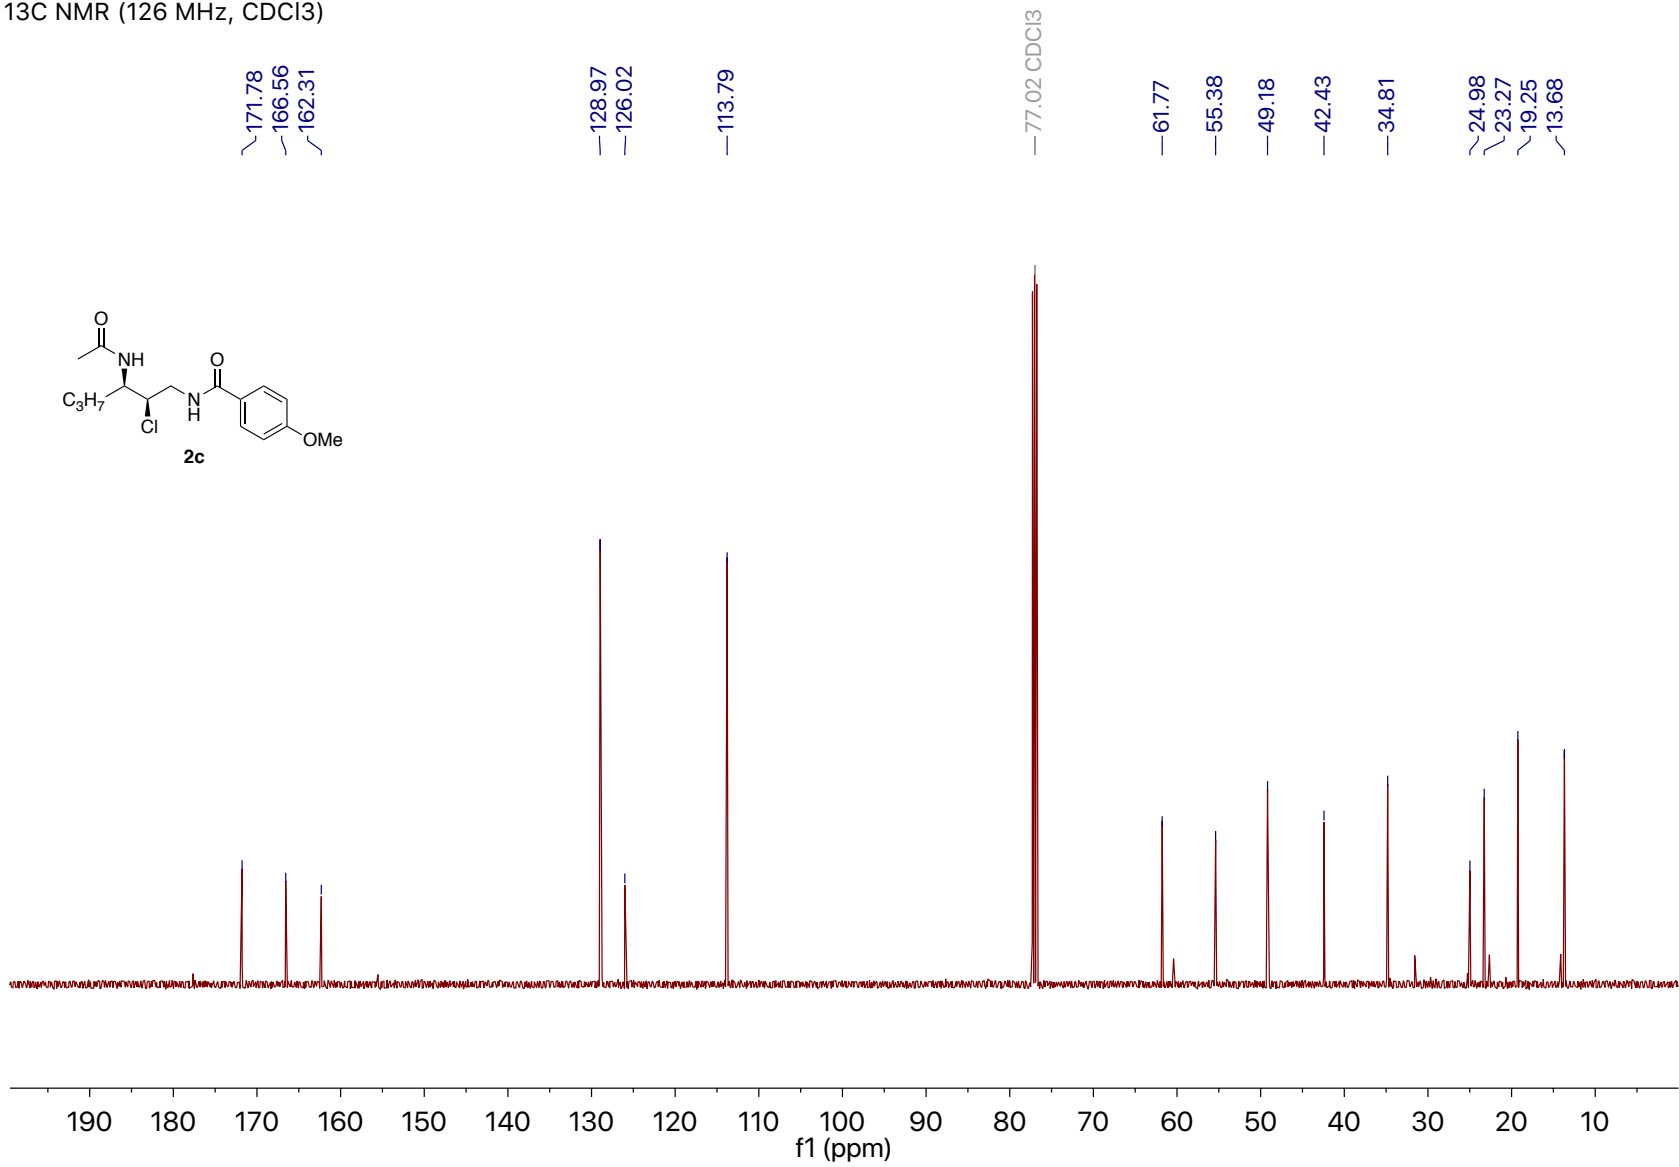

1H NMR (500 MHz, CDCl3)

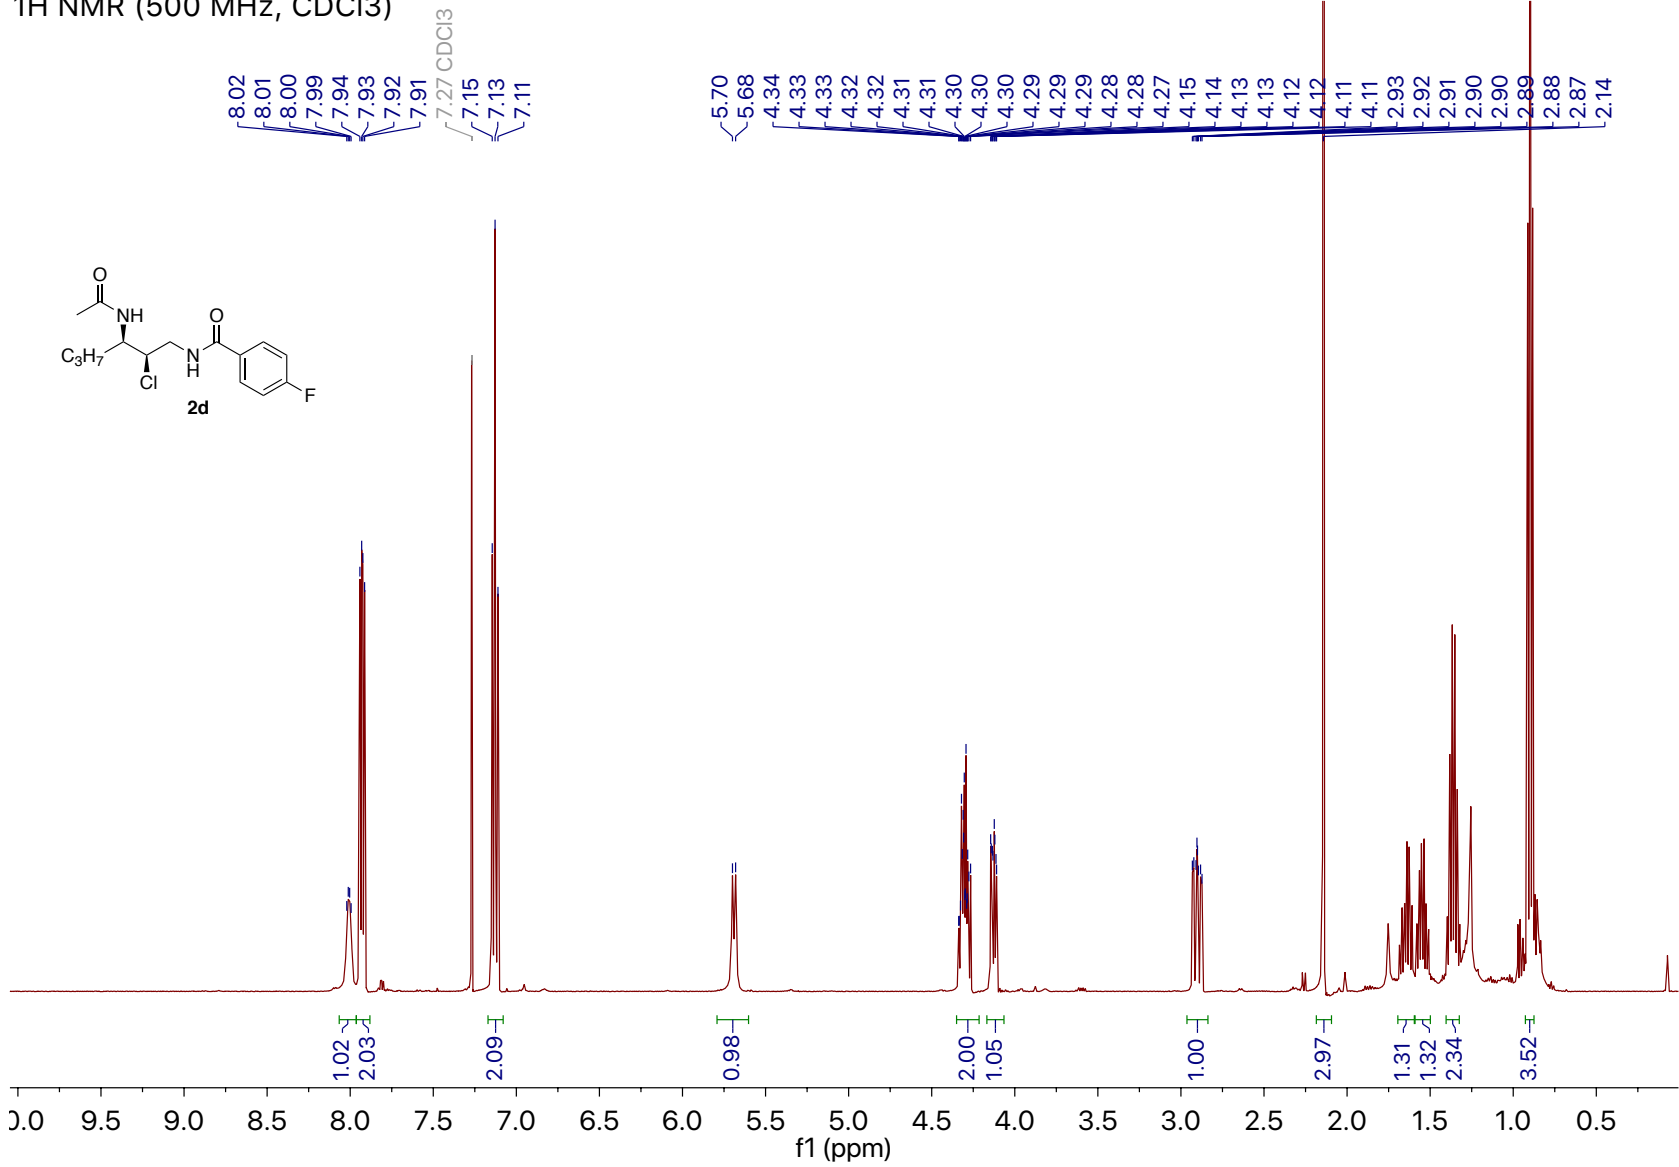

13C NMR (126 MHz, CDCl3)

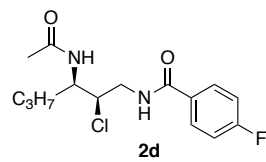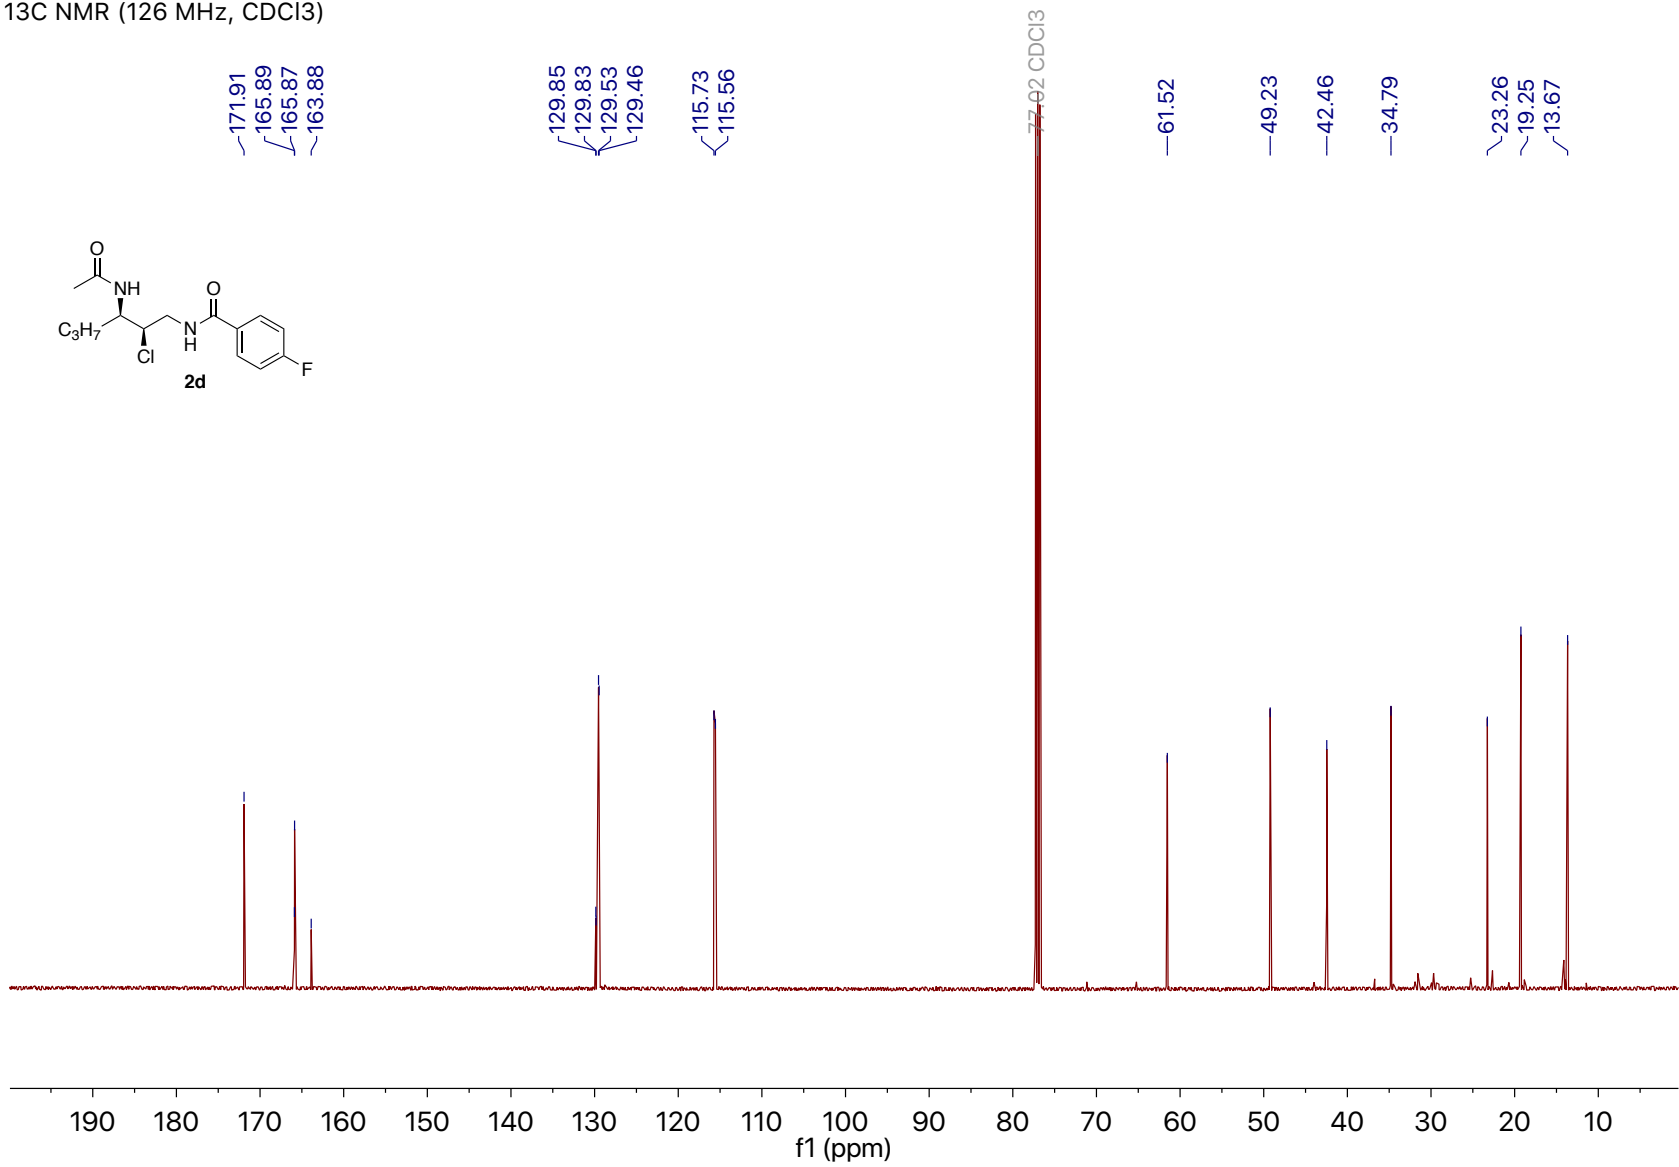

19F NMR (470 MHz, CDCl3)

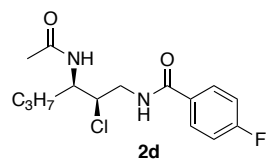

-108.06

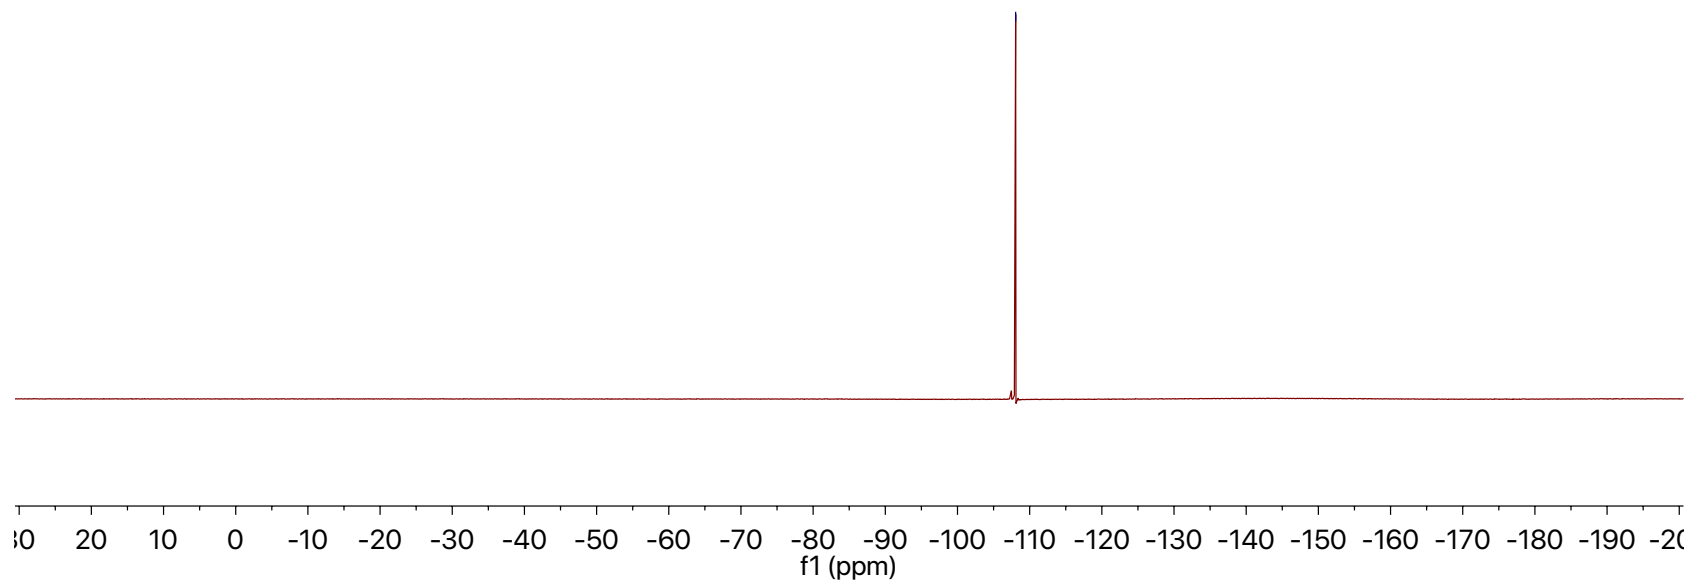

1H NMR (500 MHz, CDCl3)

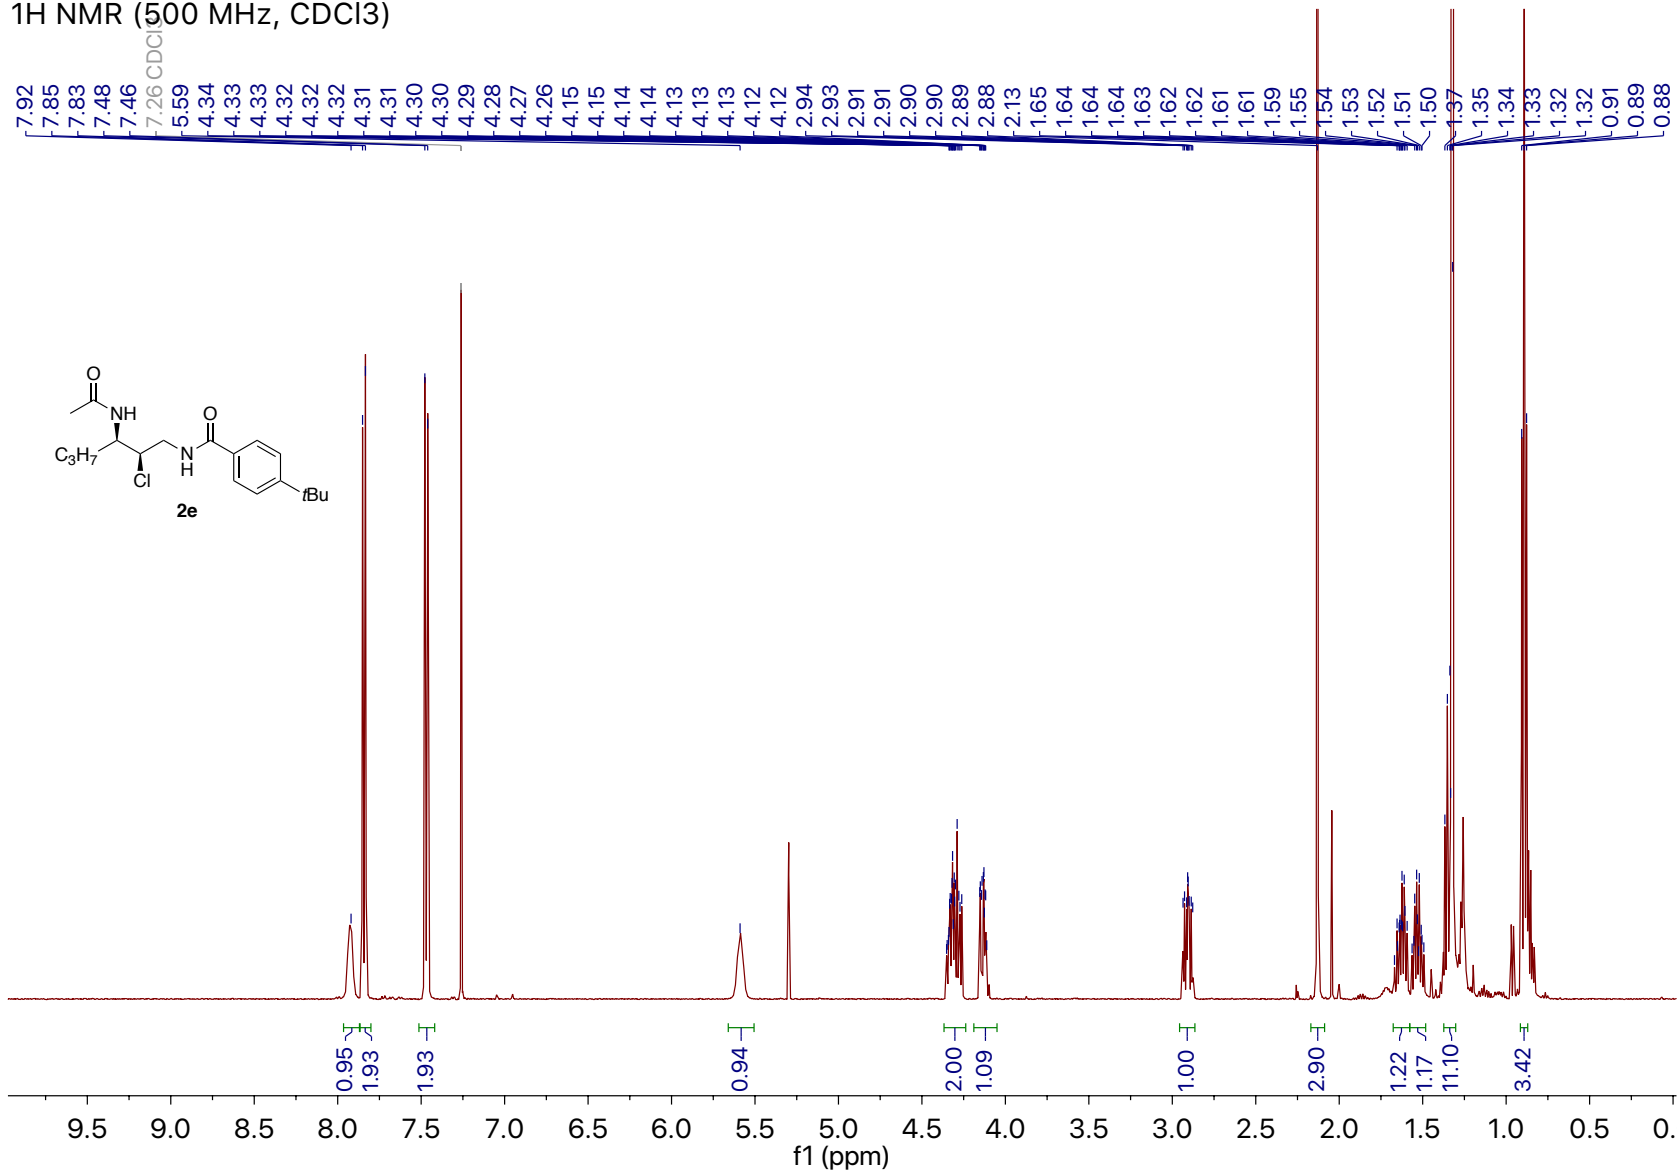



<sup>13</sup>C NMR (126 MHz, CDCl<sub>3</sub>)

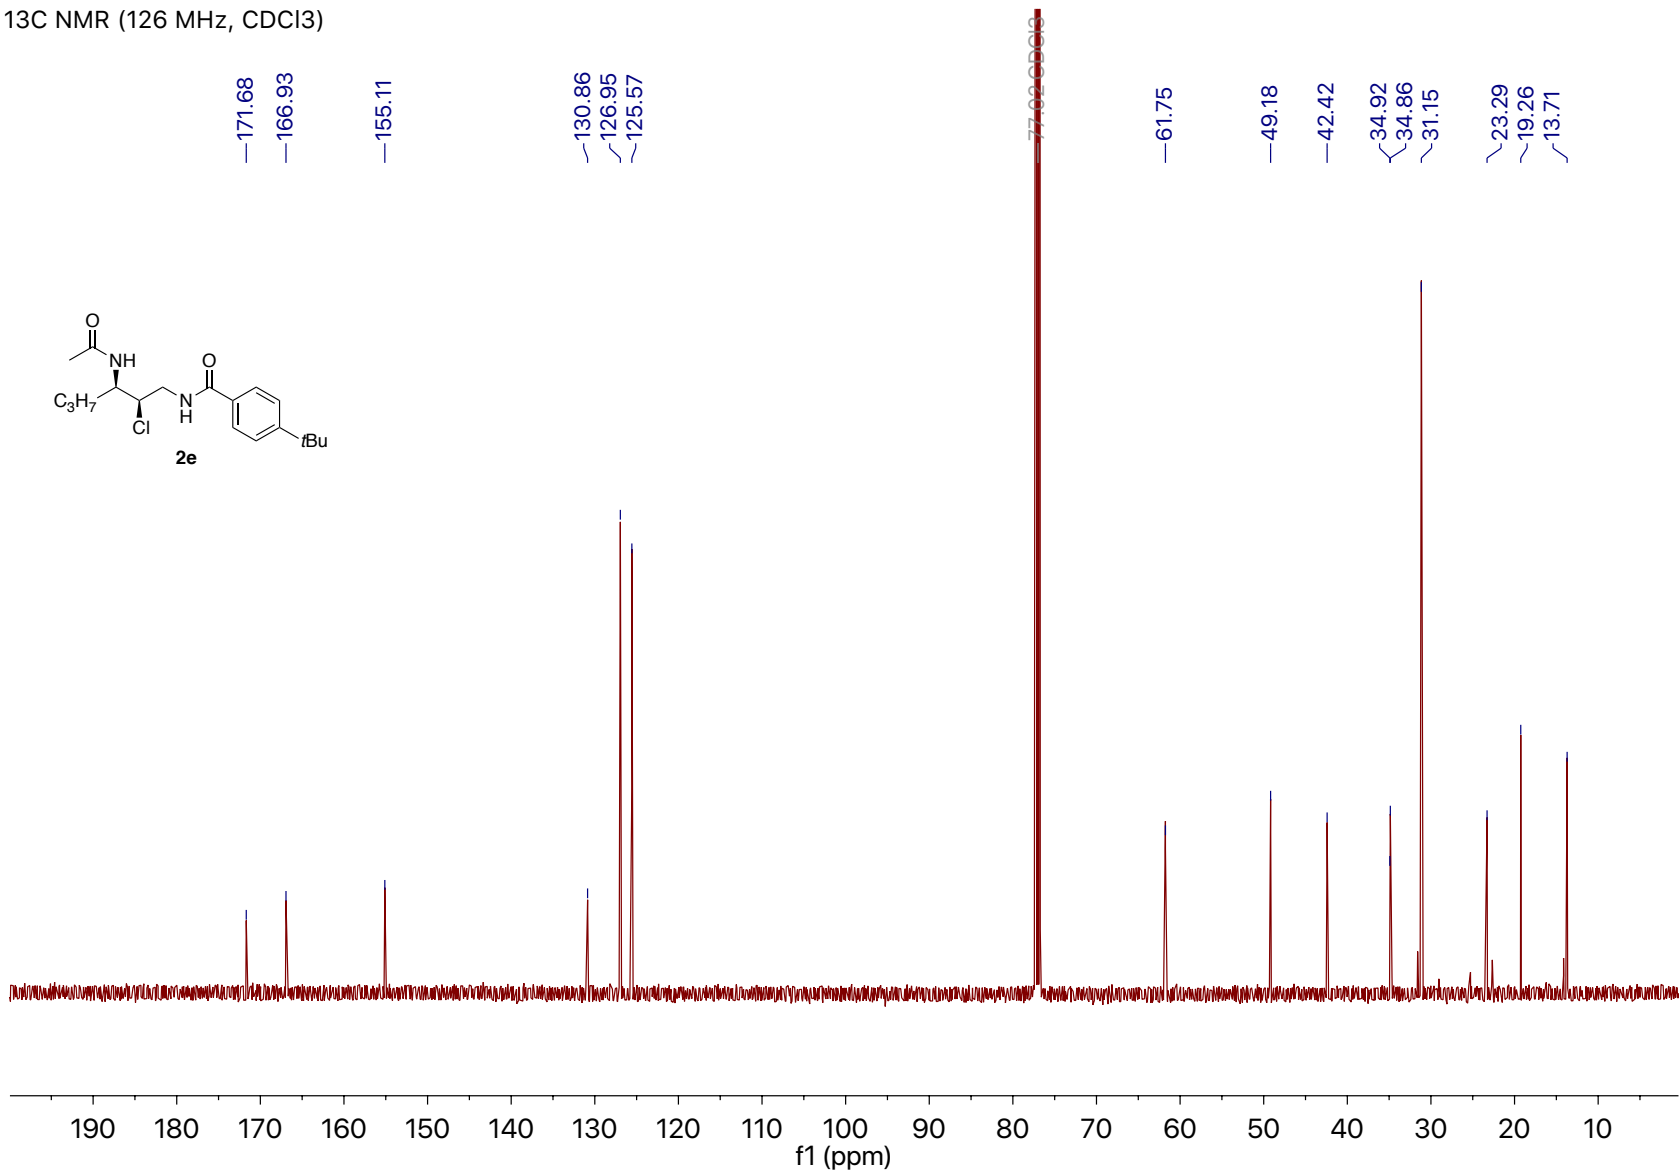

1H NMR (500 MHz, CDCl3)

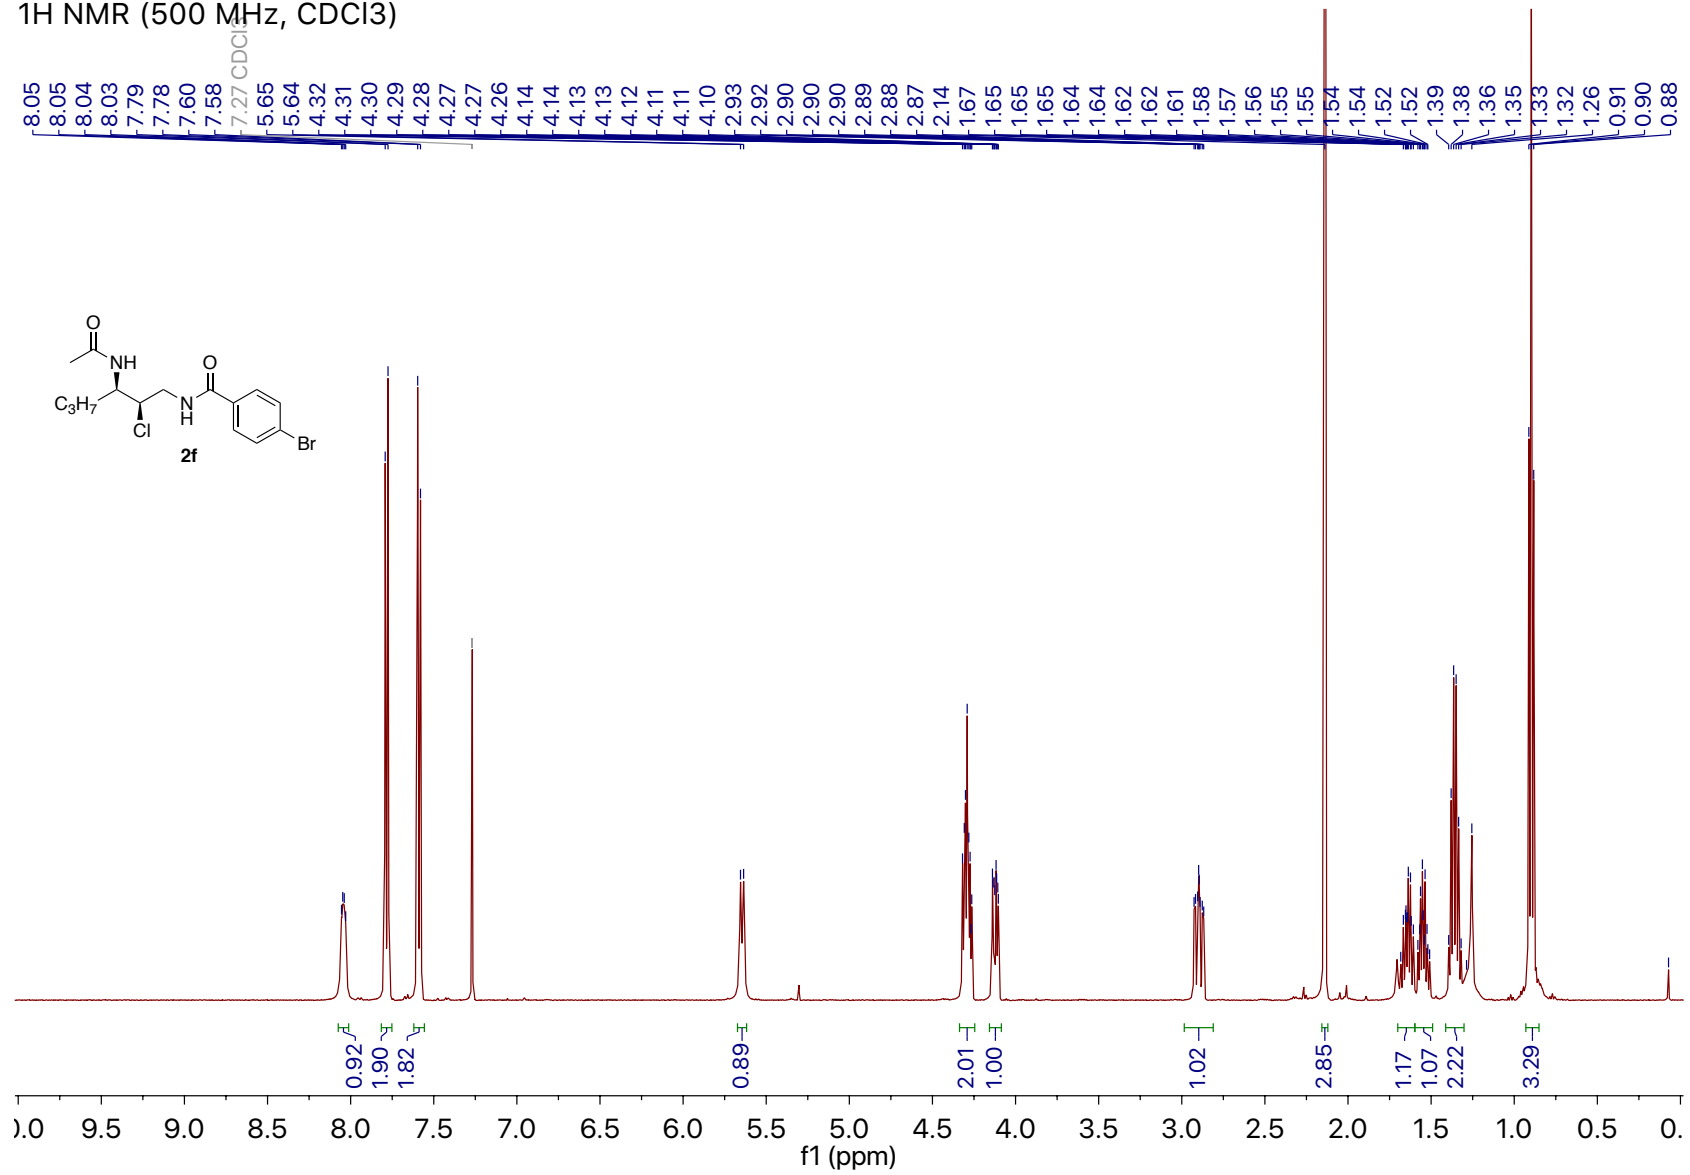

<sup>13</sup>C NMR (126 MHz, CDCl<sub>3</sub>)

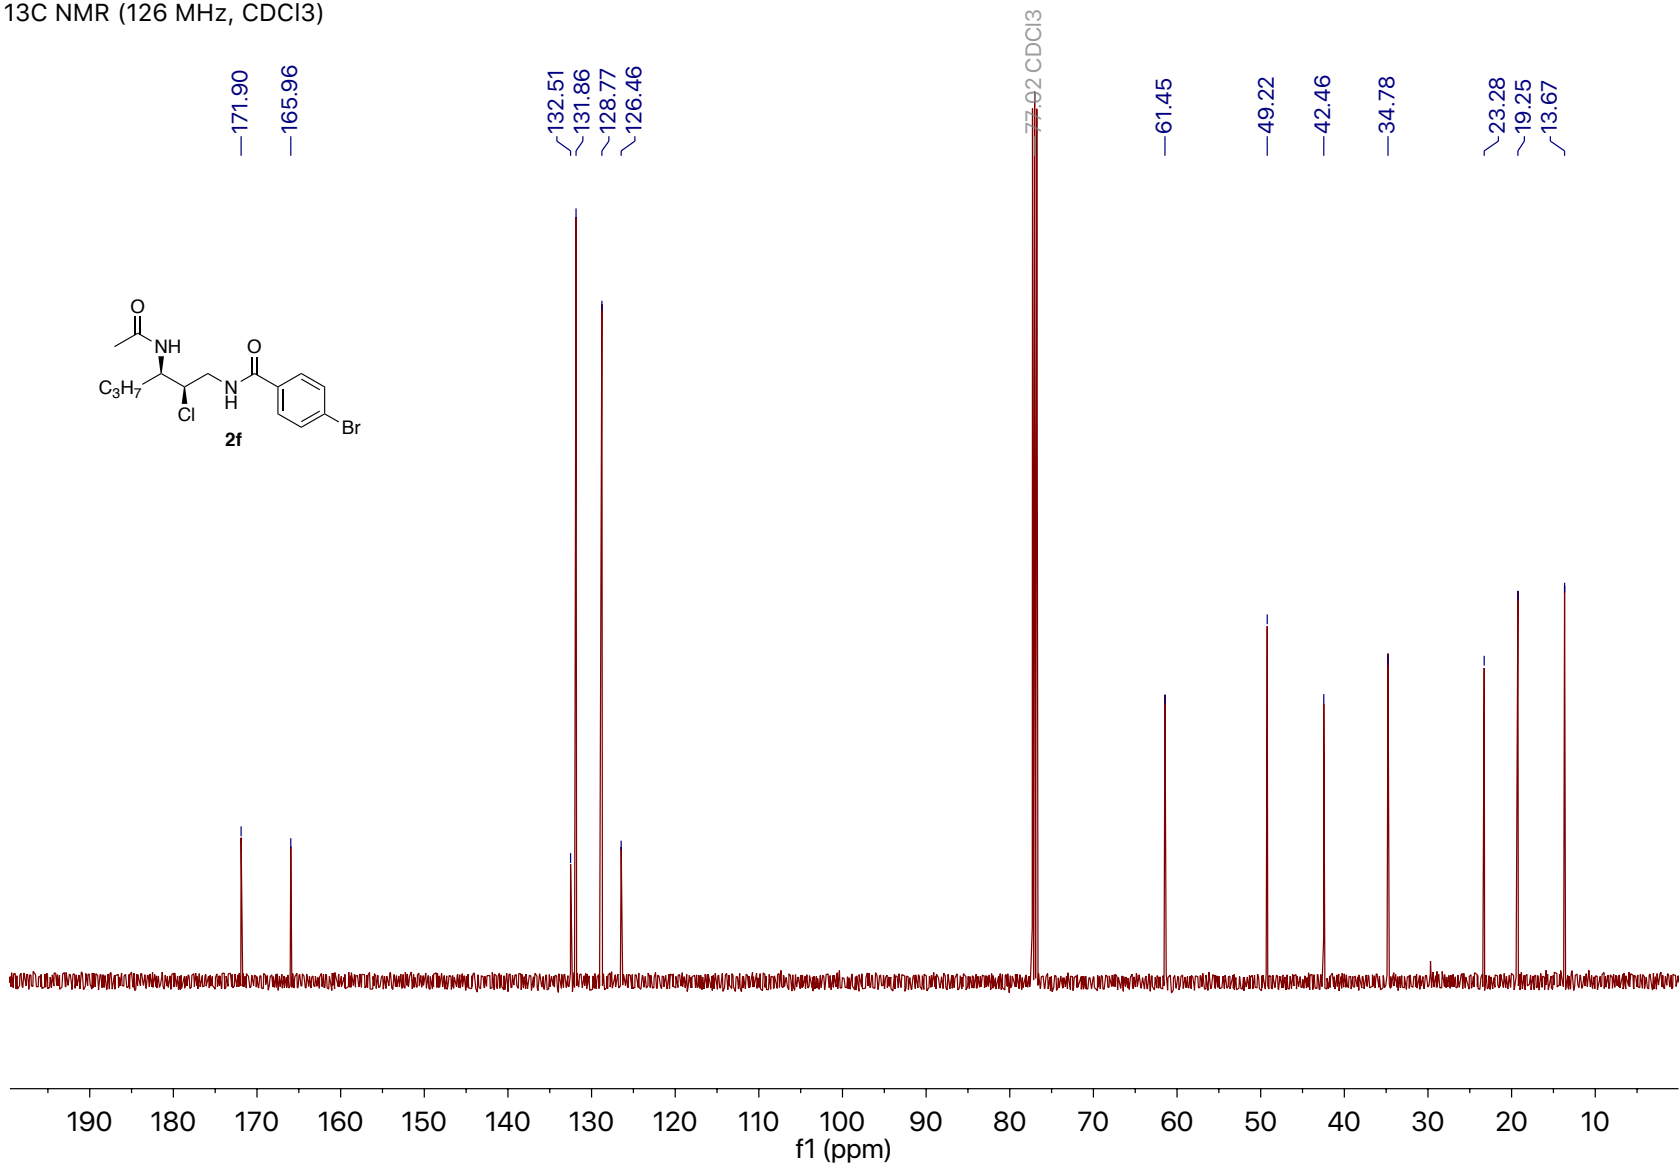

<sup>1</sup>H NMR (500 MHz, CDCl<sub>3</sub>)

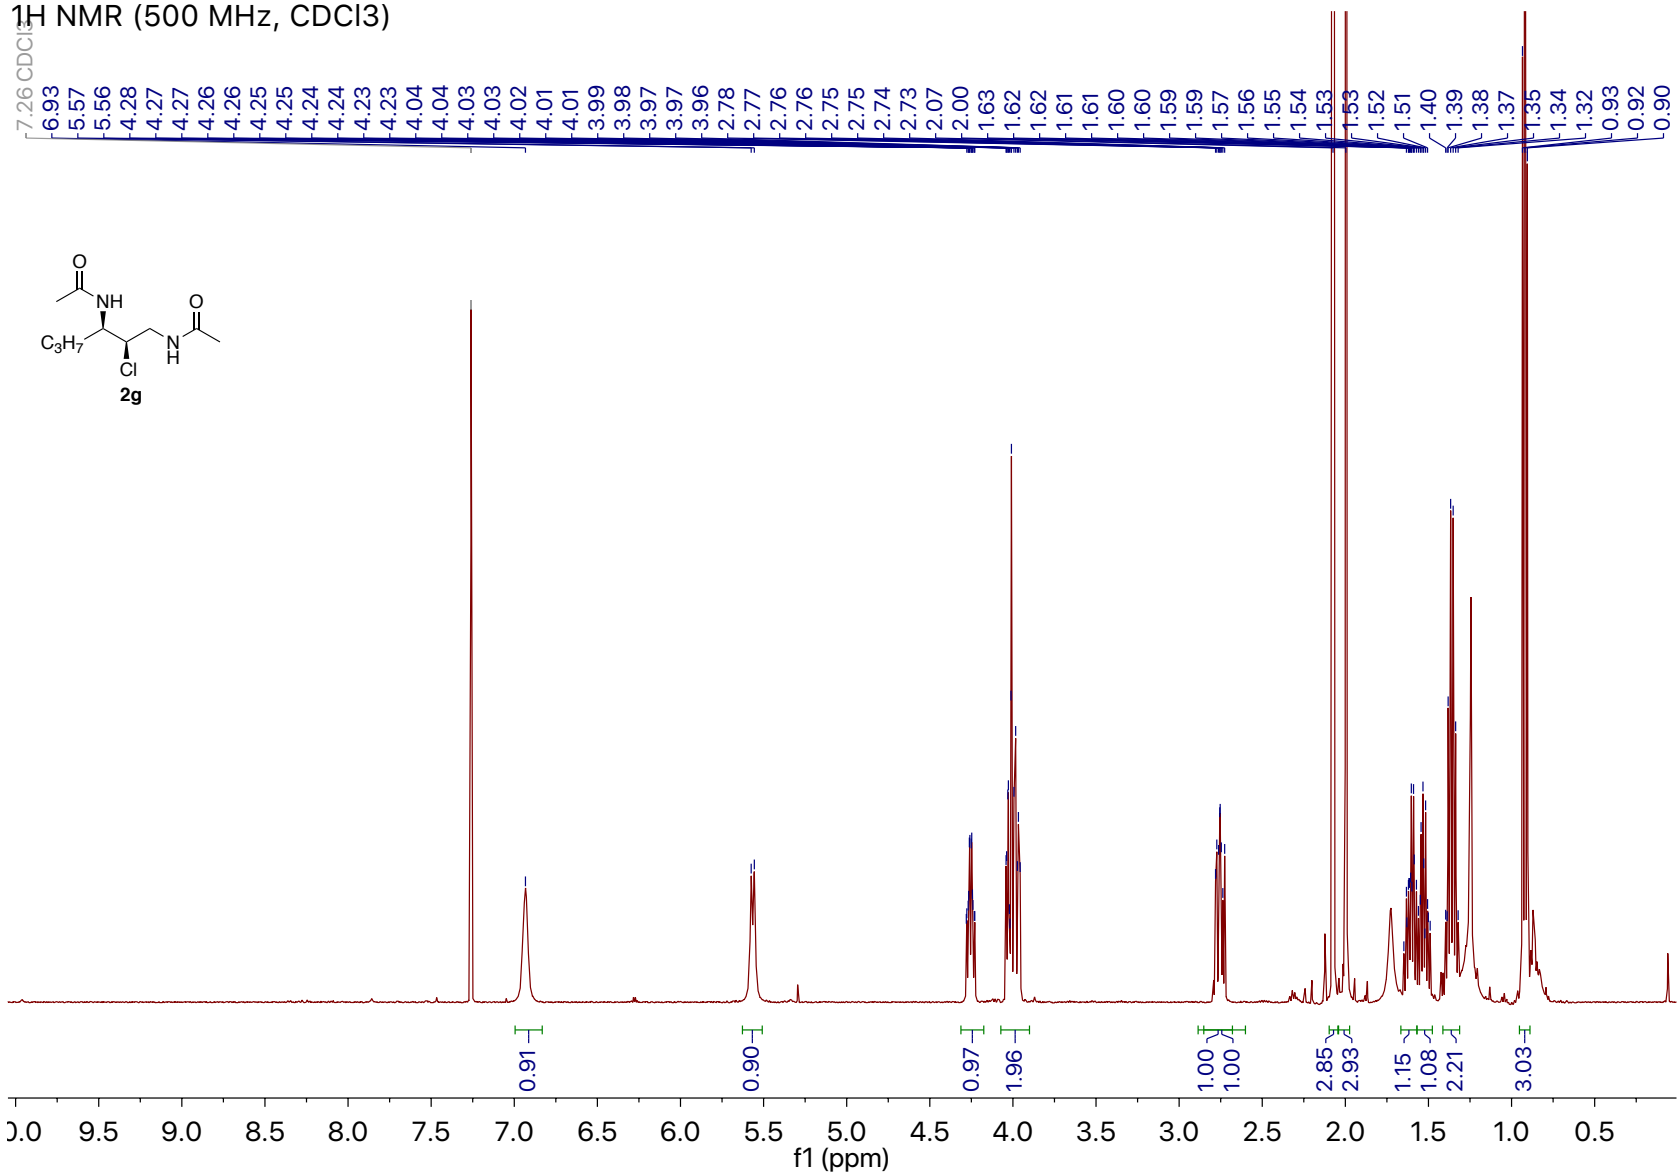

<sup>13</sup>C NMR (126 MHz, CDCl<sub>3</sub>)

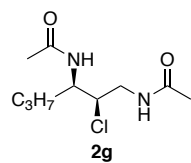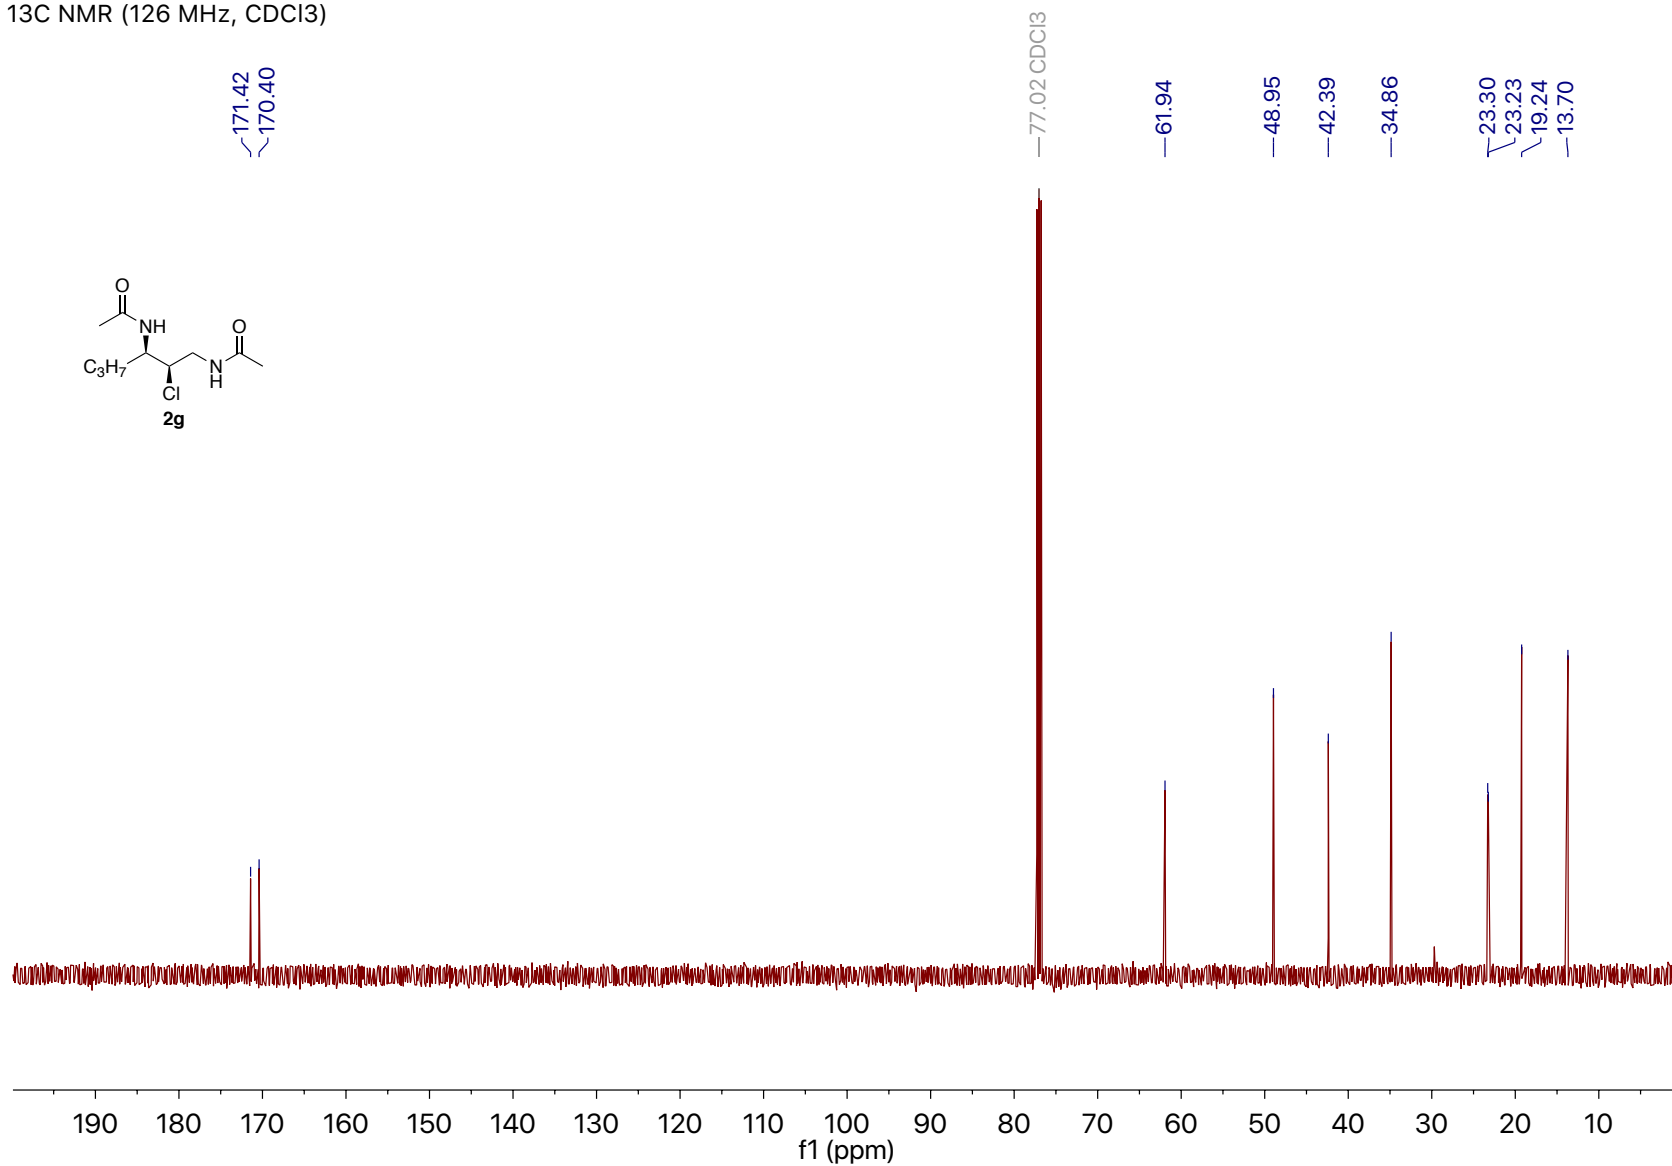

1H NMR (500 MHz, (CD3)2SO)

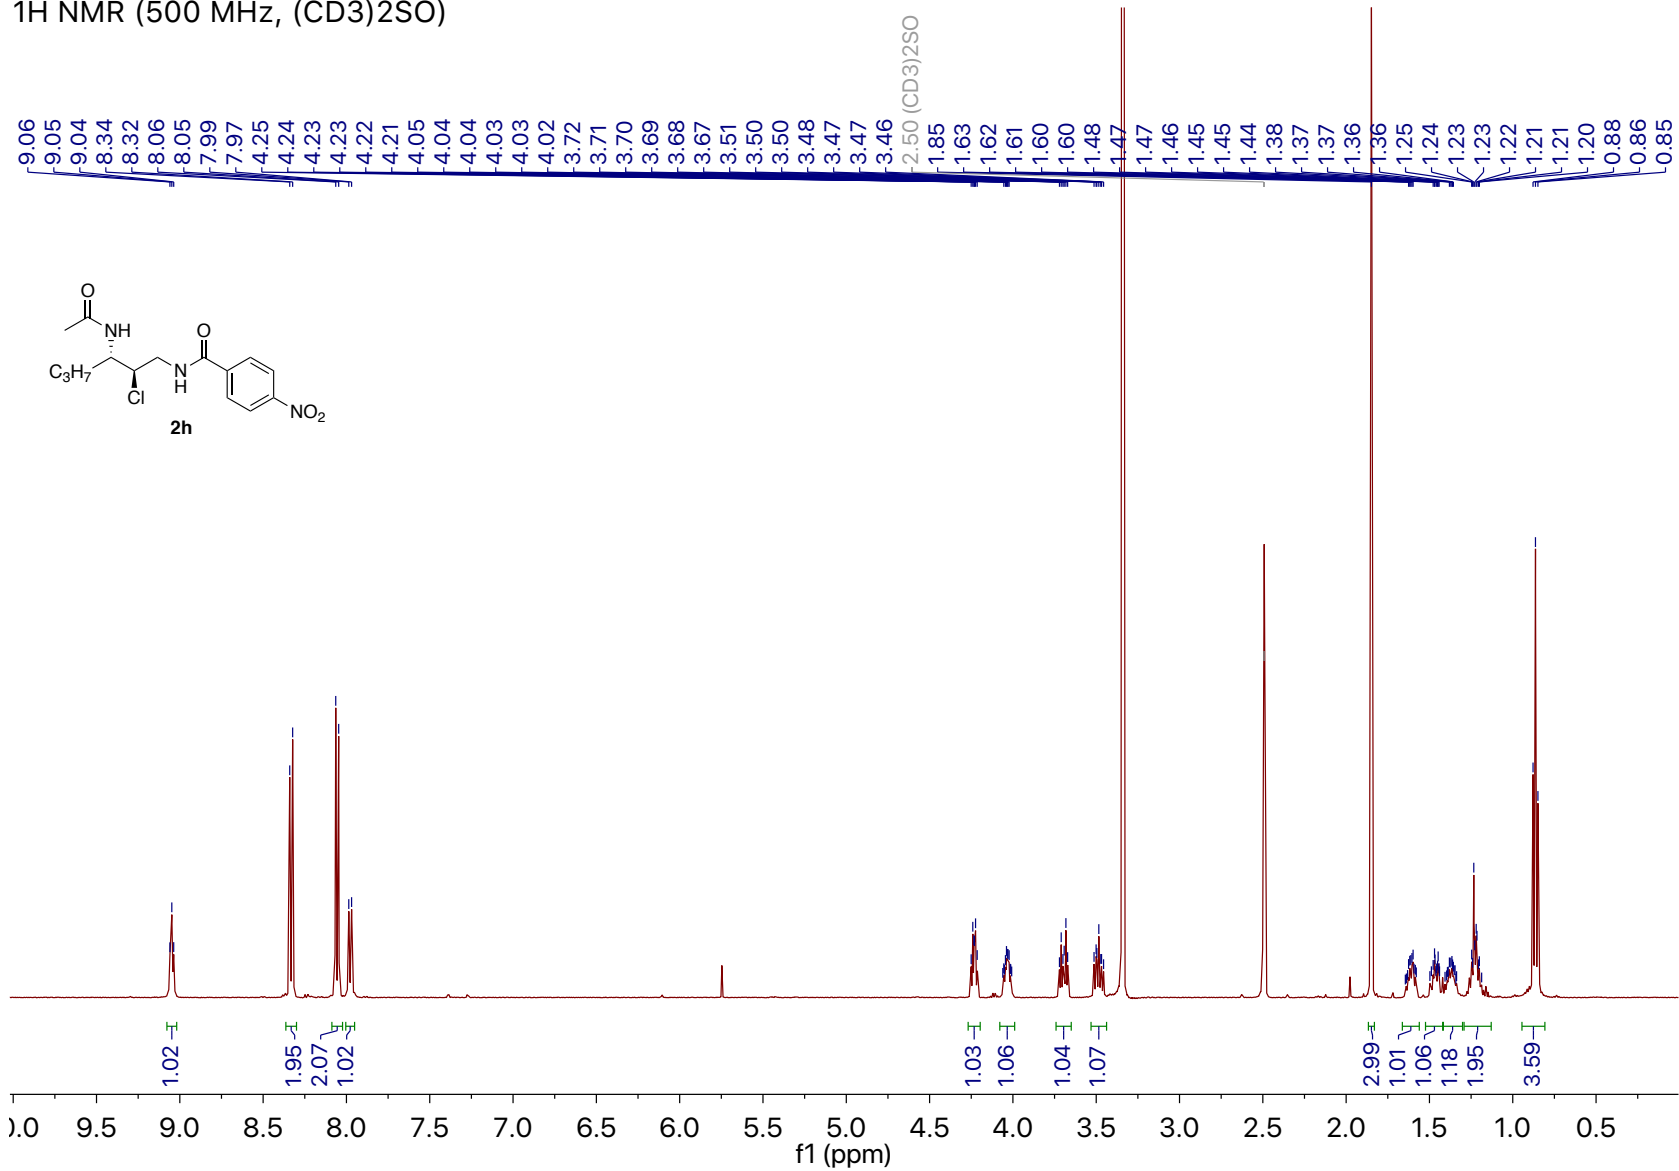

<sup>13</sup>C NMR (126 MHz, (CD<sub>3</sub>)<sub>2</sub>SO)

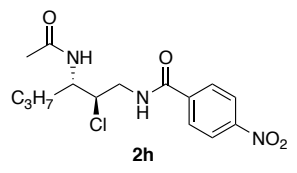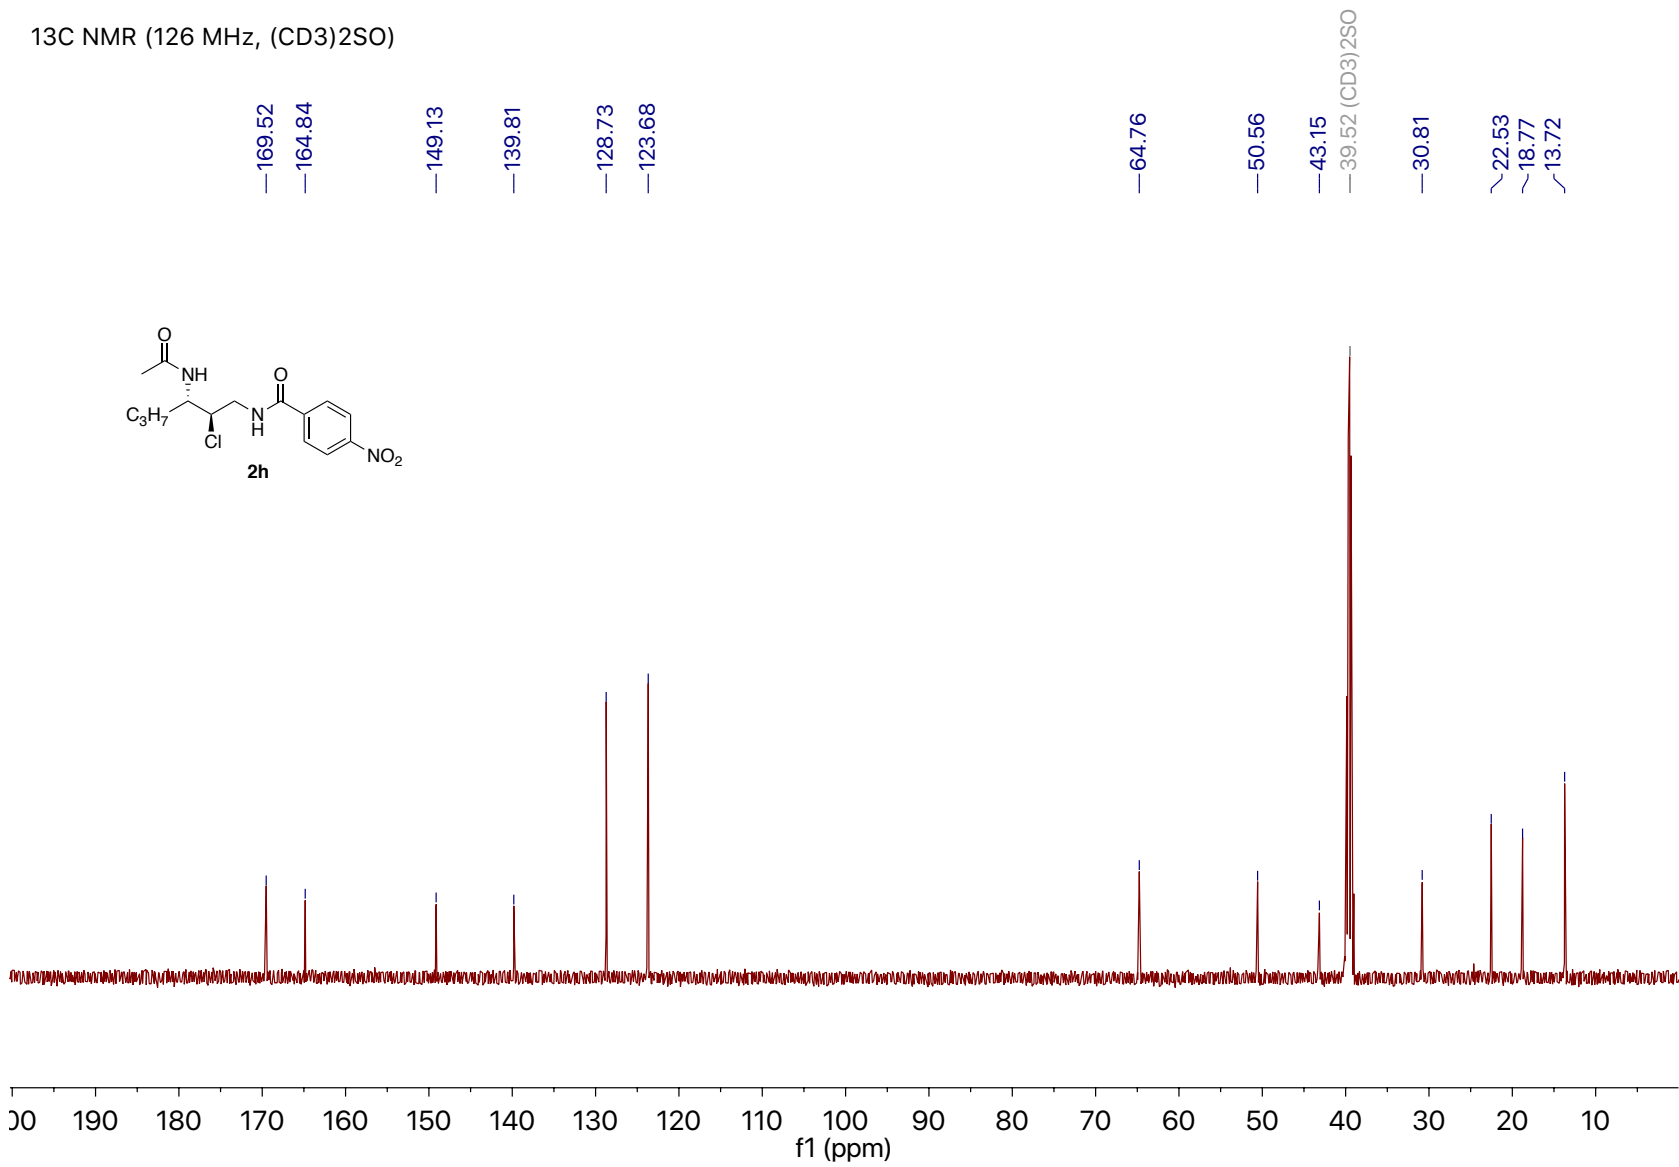

1H NMR (500 MHz, (CD3)2SO)

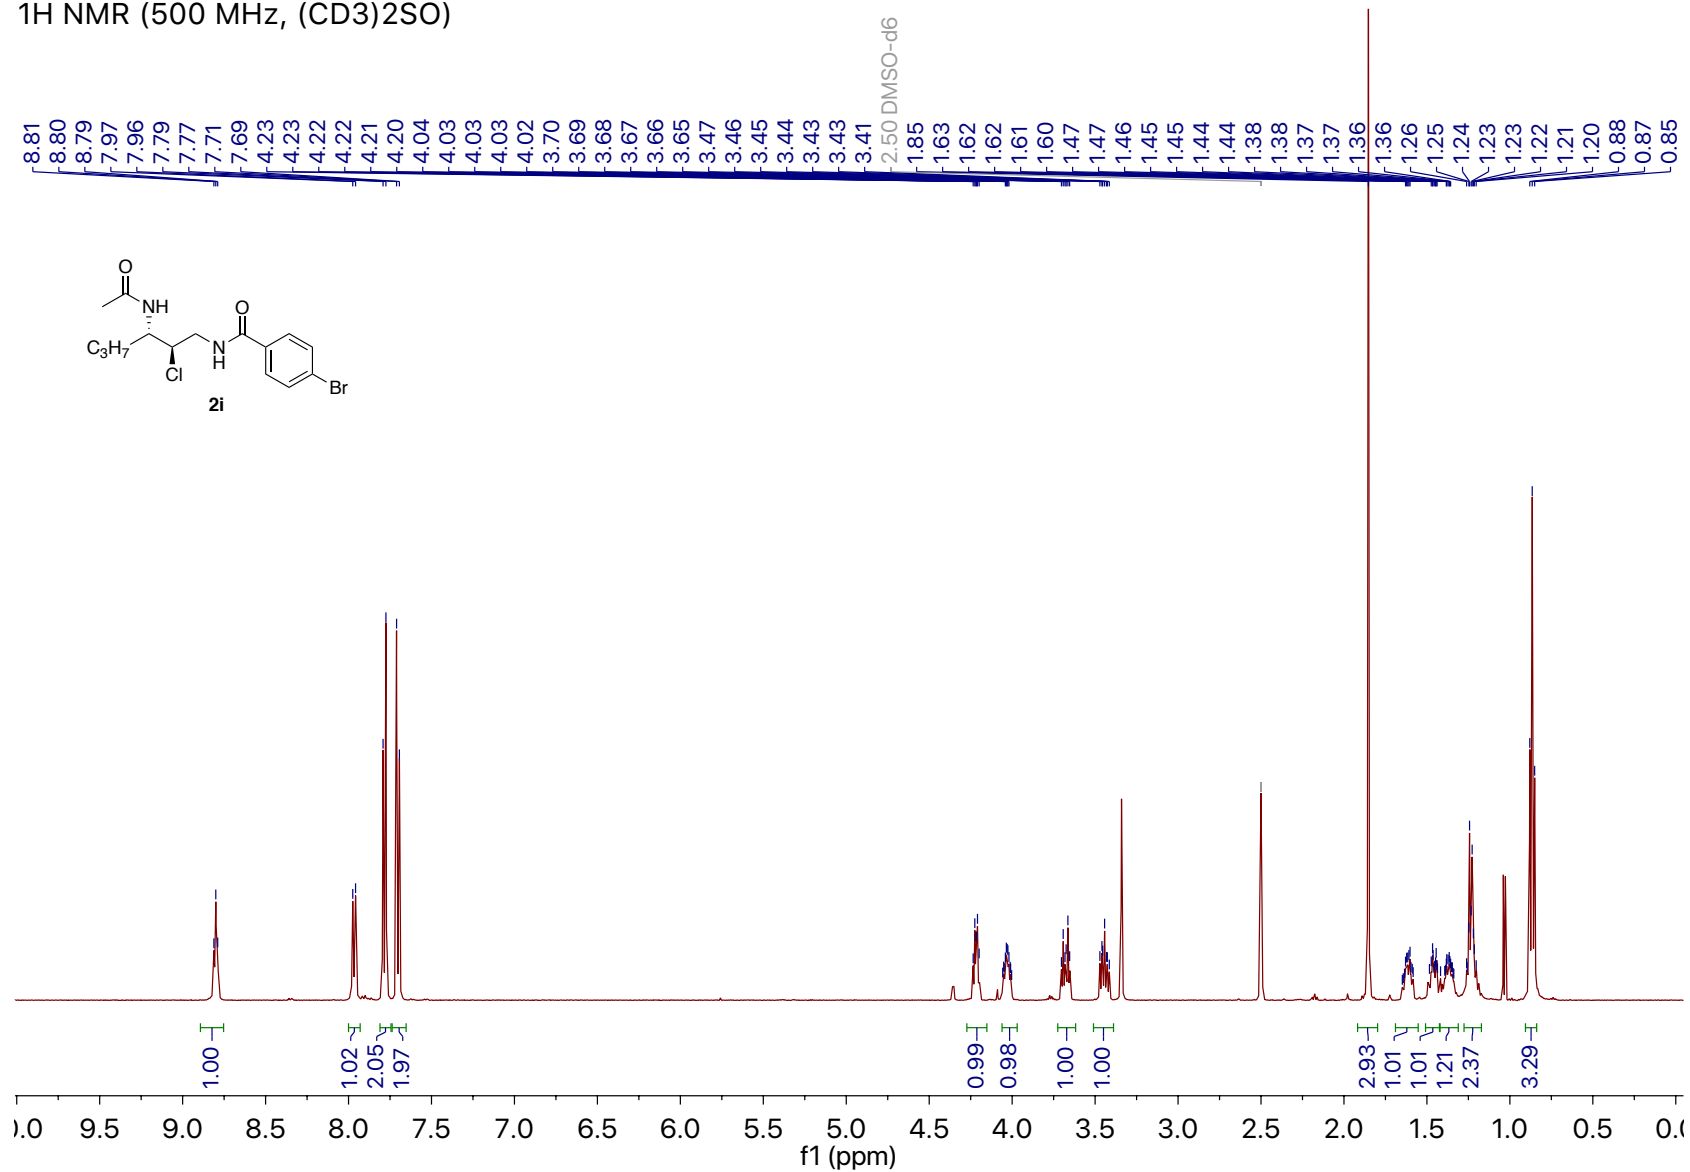



<sup>13</sup>C NMR (126 MHz, (CD<sub>3</sub>)<sub>2</sub>SO)

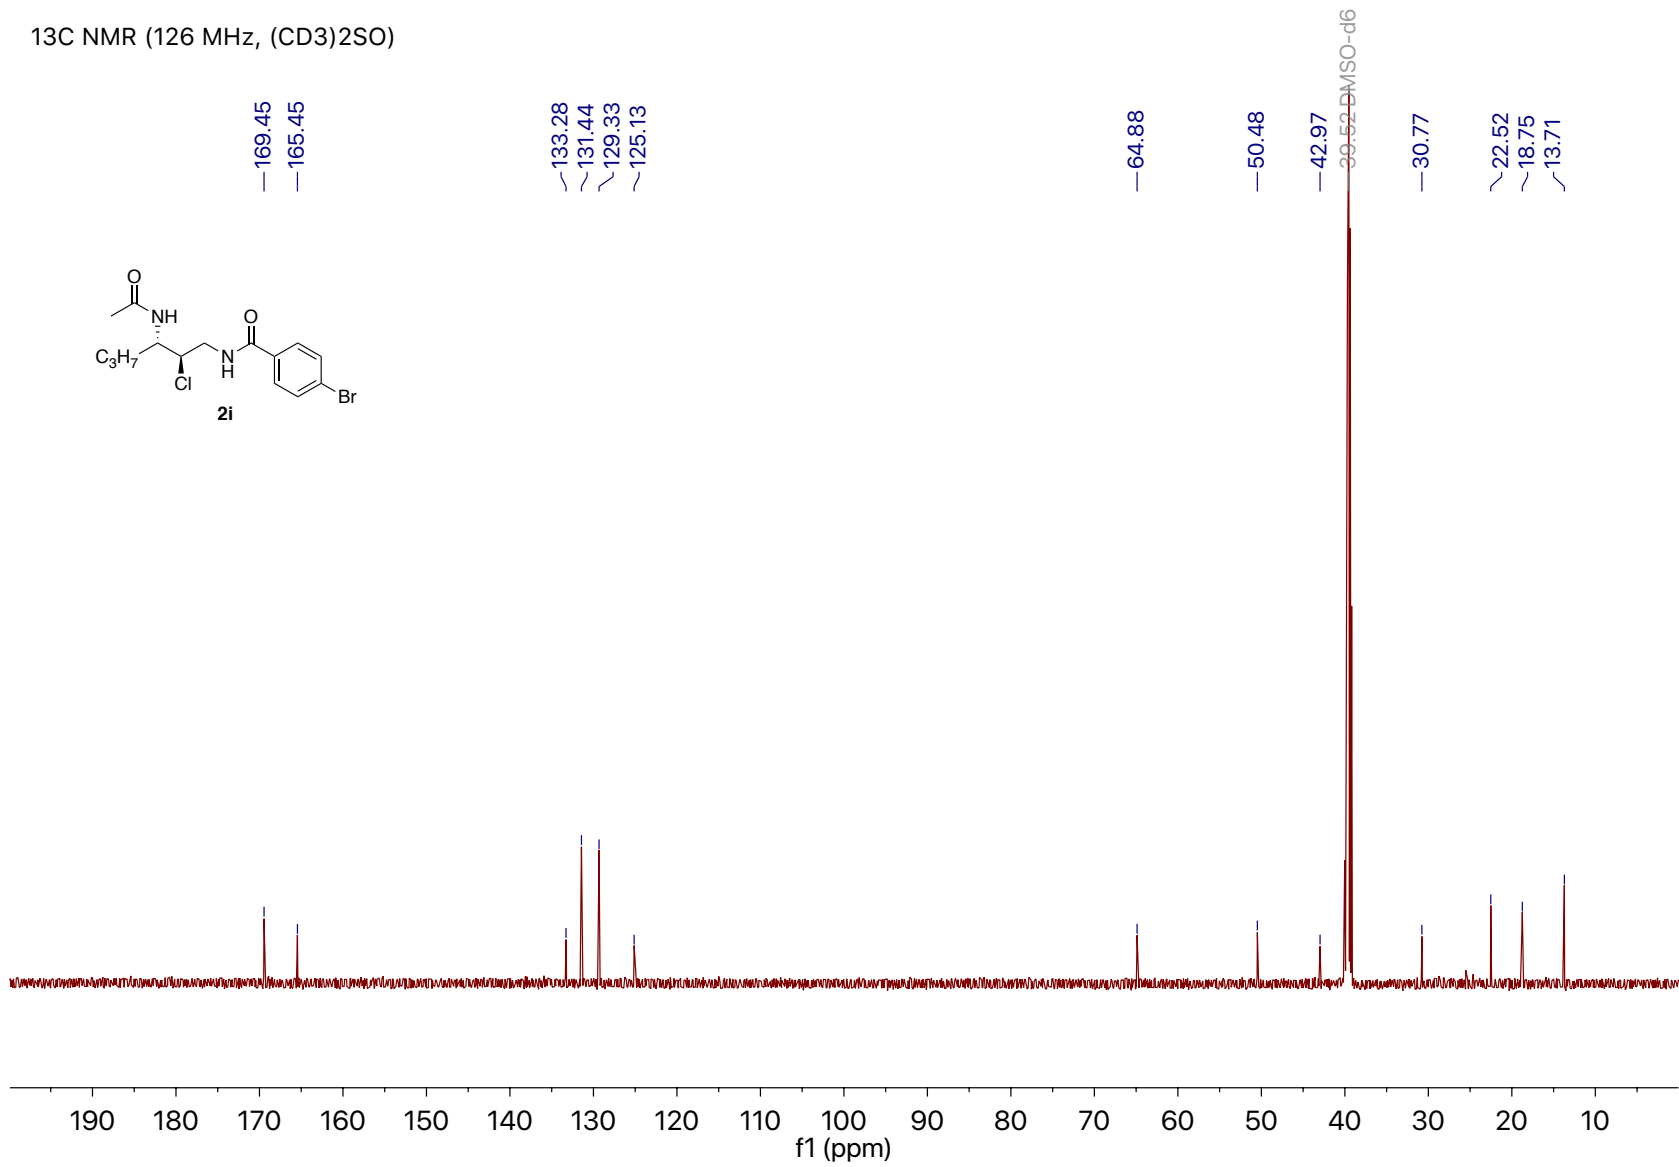

1H NMR (500 MHz, CDCl3)

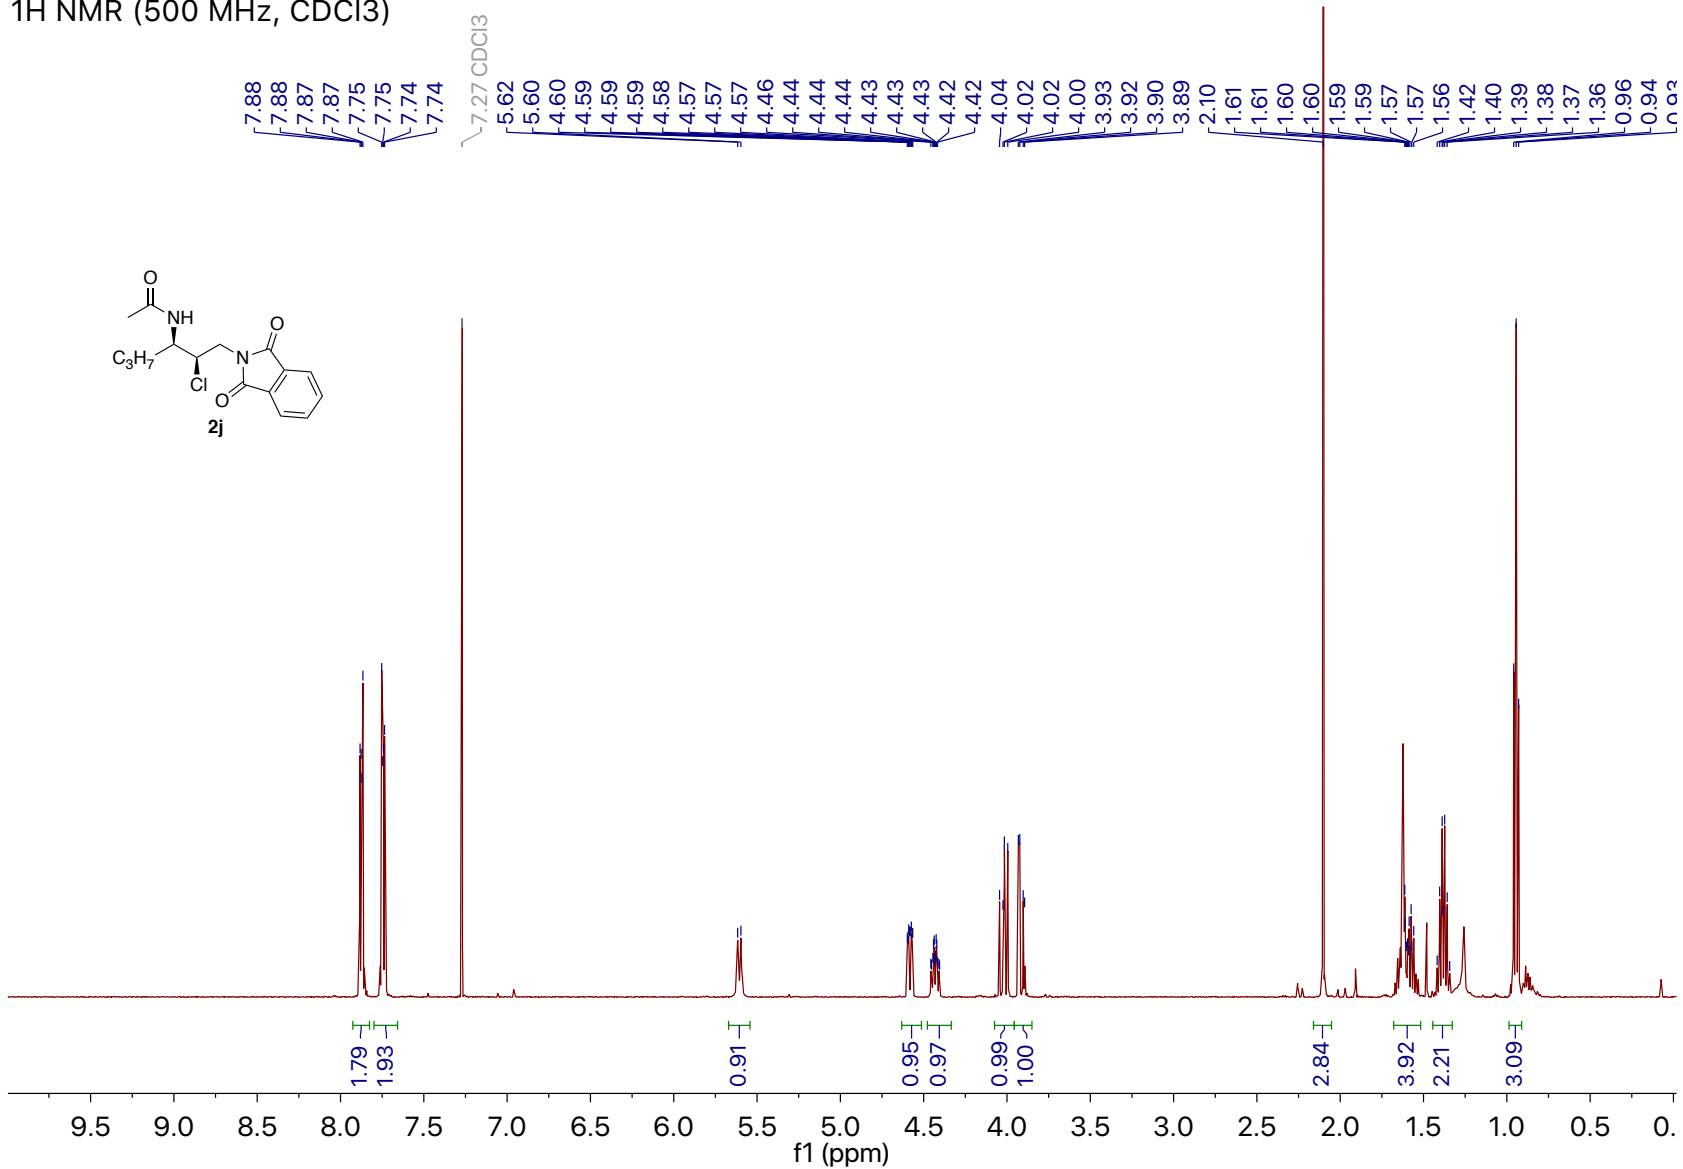

<sup>13</sup>C NMR (126 MHz, CDCl<sub>3</sub>)

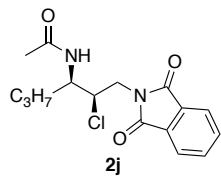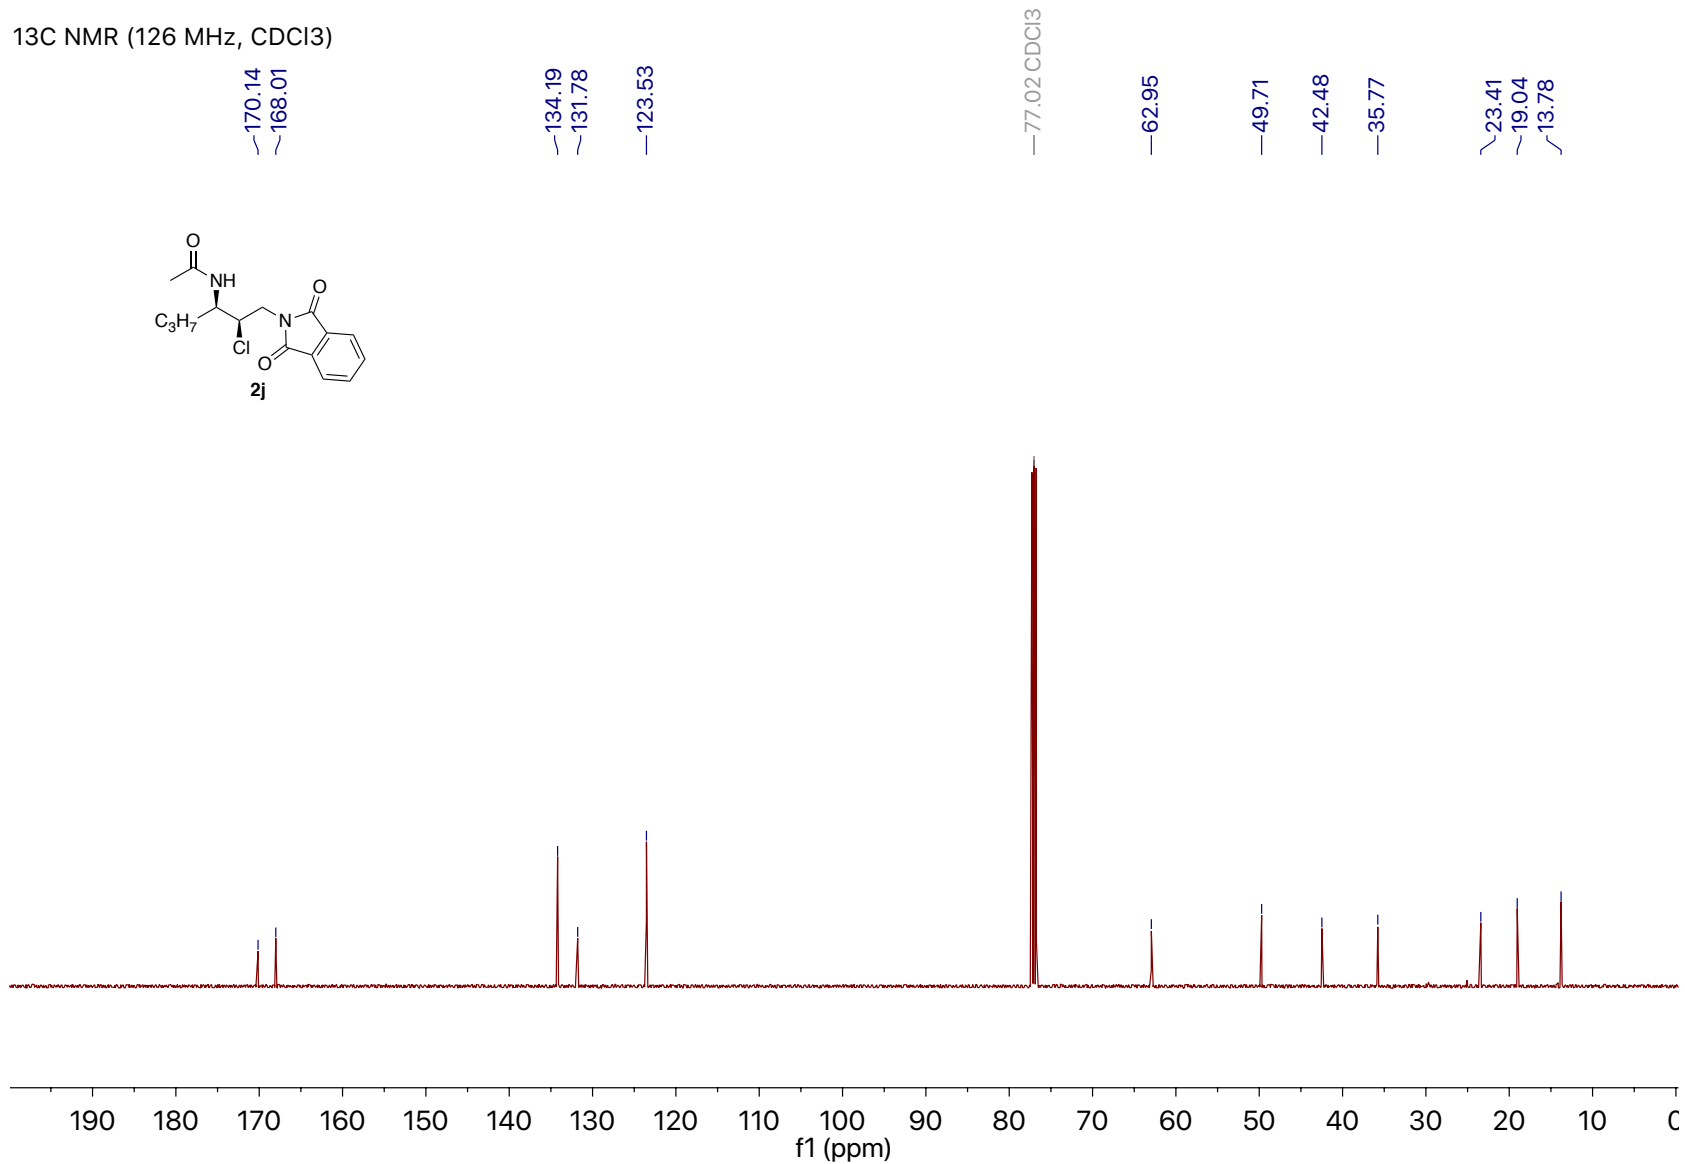

1H NMR (500 MHz, CDCl3)

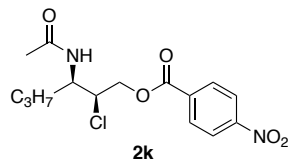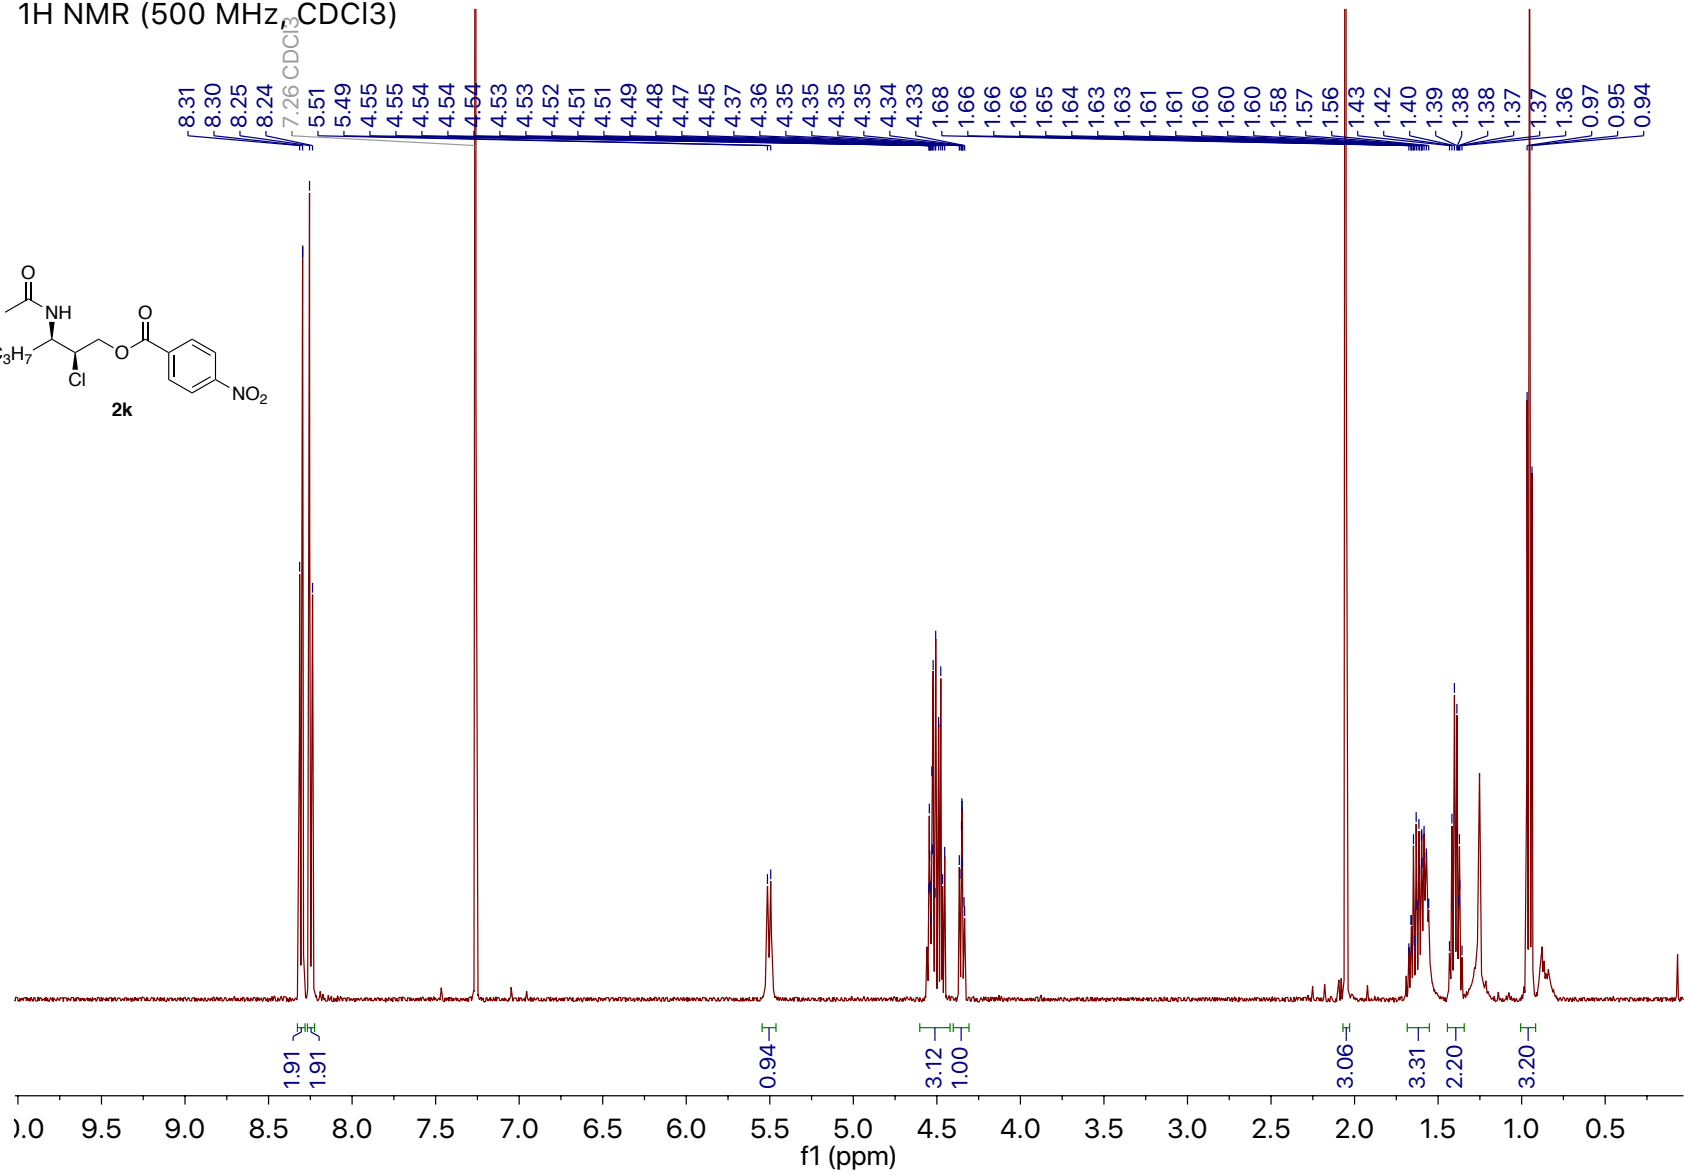

JMR (126 MHz, CDCl<sub>3</sub>)

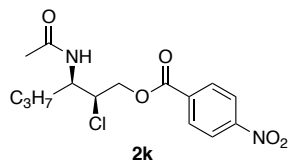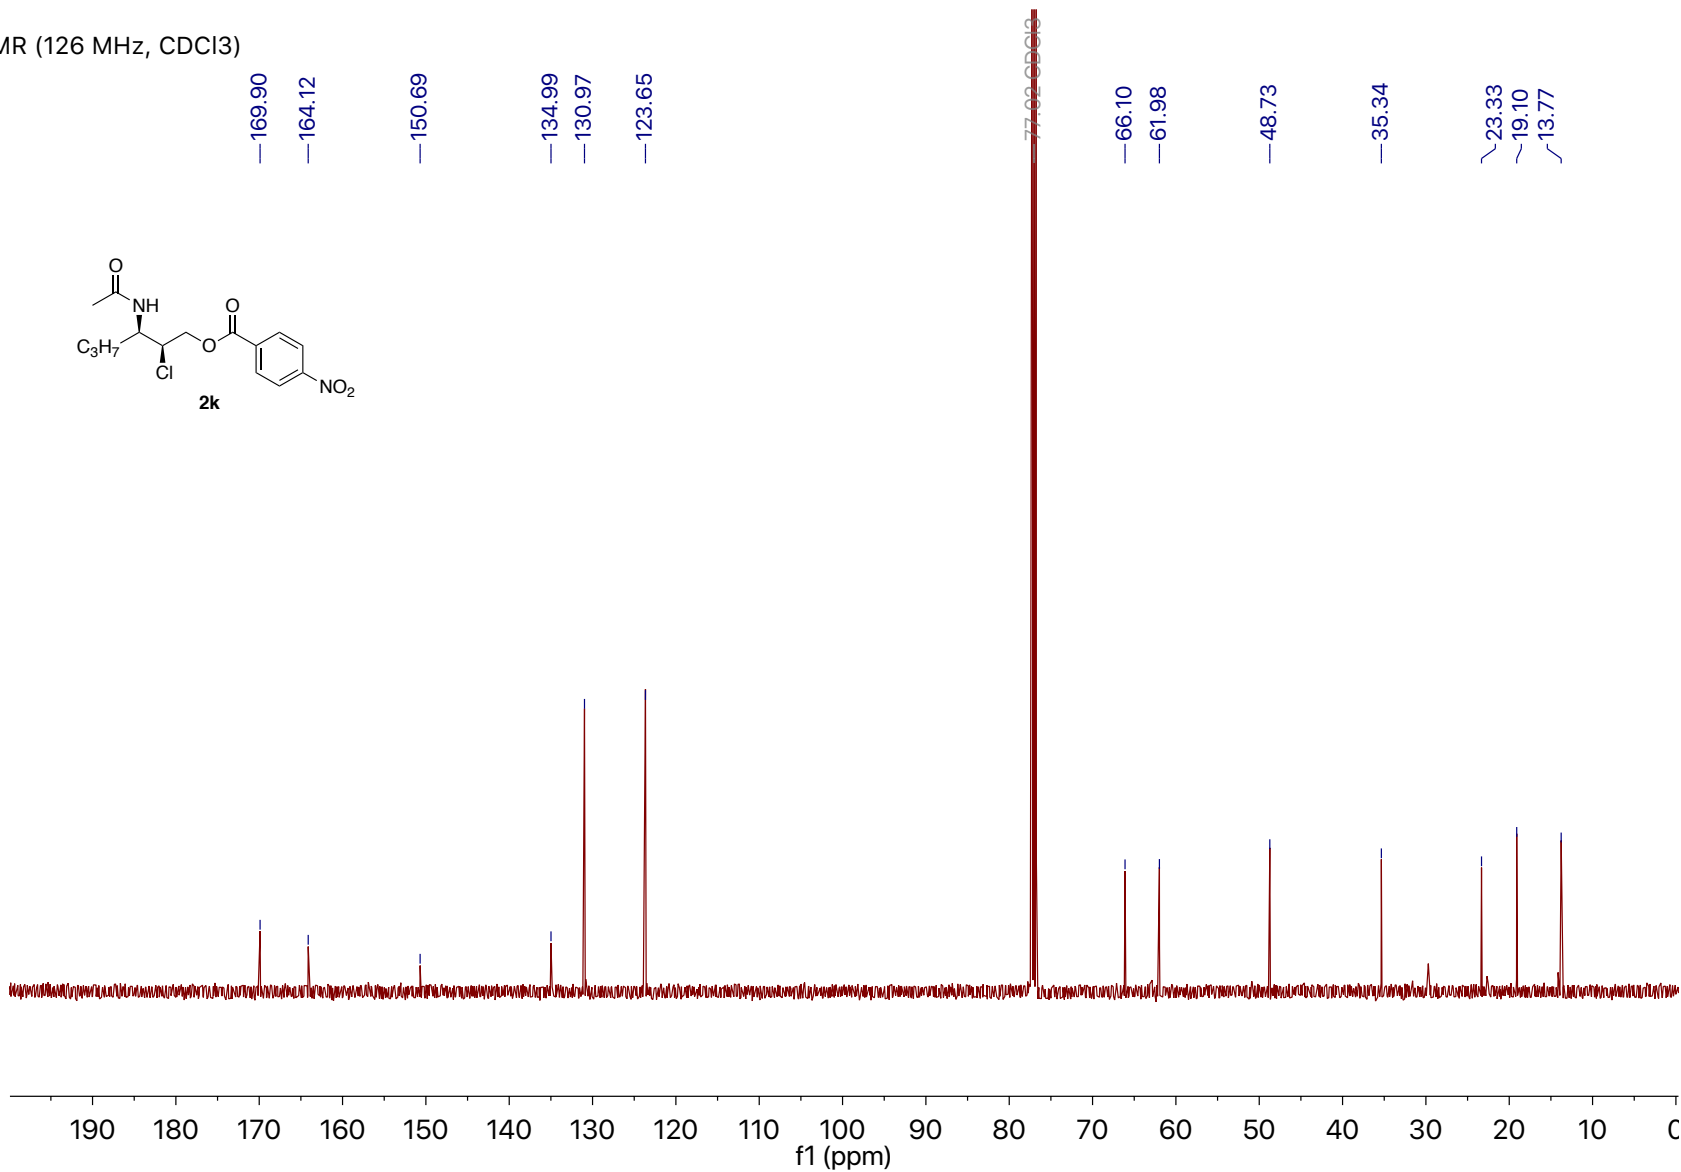

<sup>1</sup>H NMR (500 MHz, CDCl<sub>3</sub>)

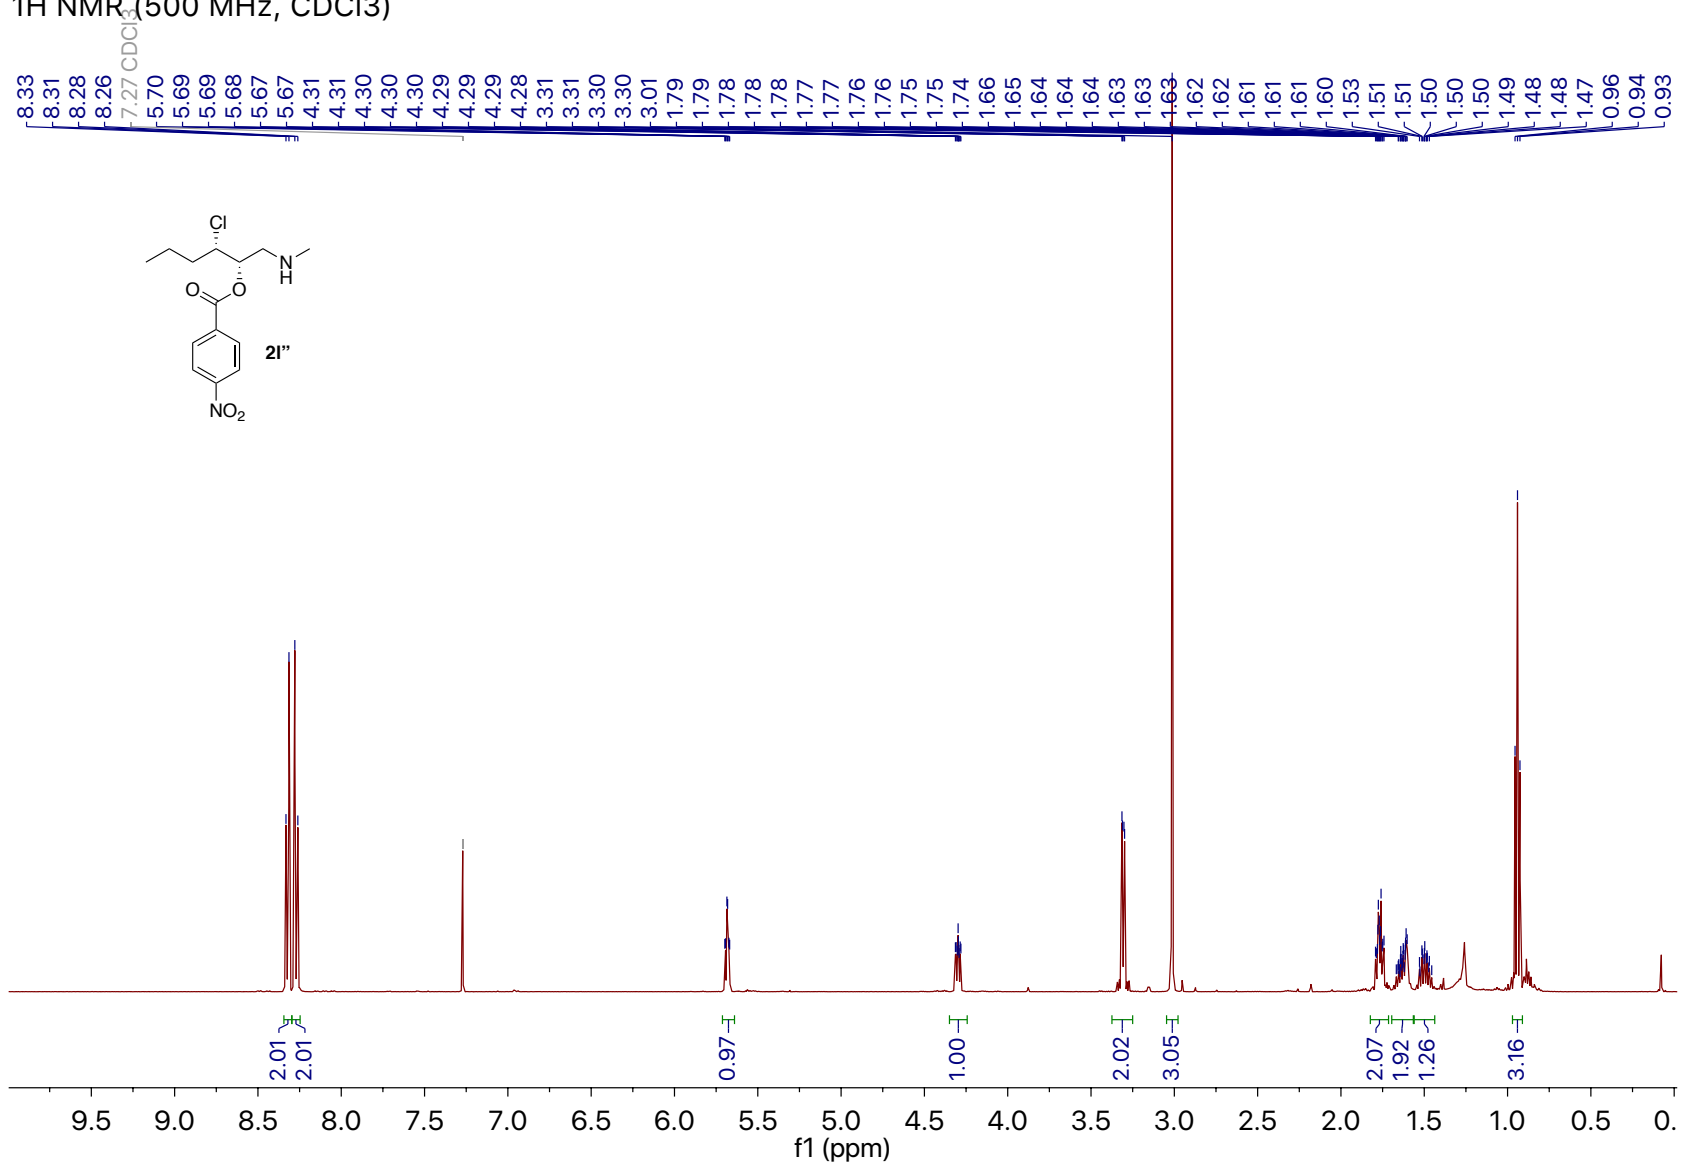

<sup>13</sup>C NMR (126 MHz, CDCl<sub>3</sub>)

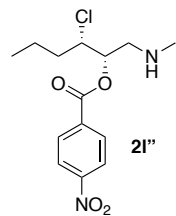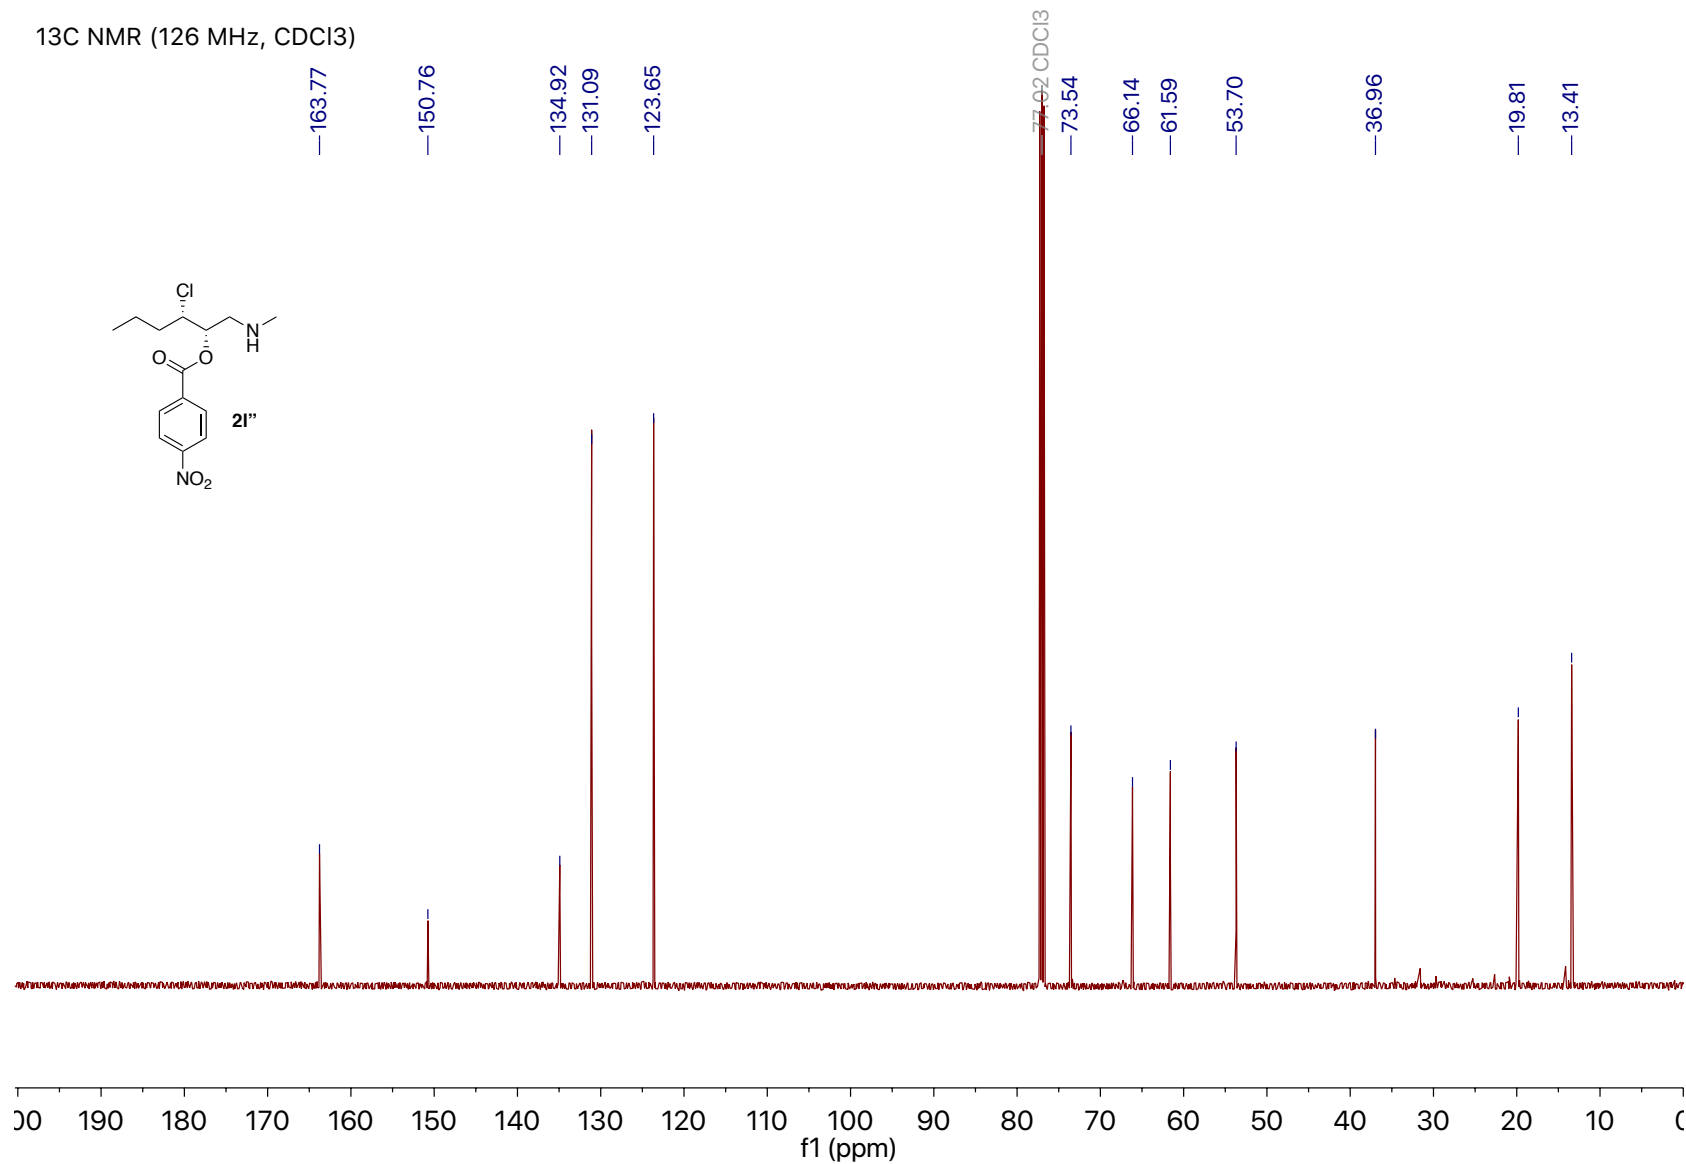

1H NMR (500 MHz, CDCl3)

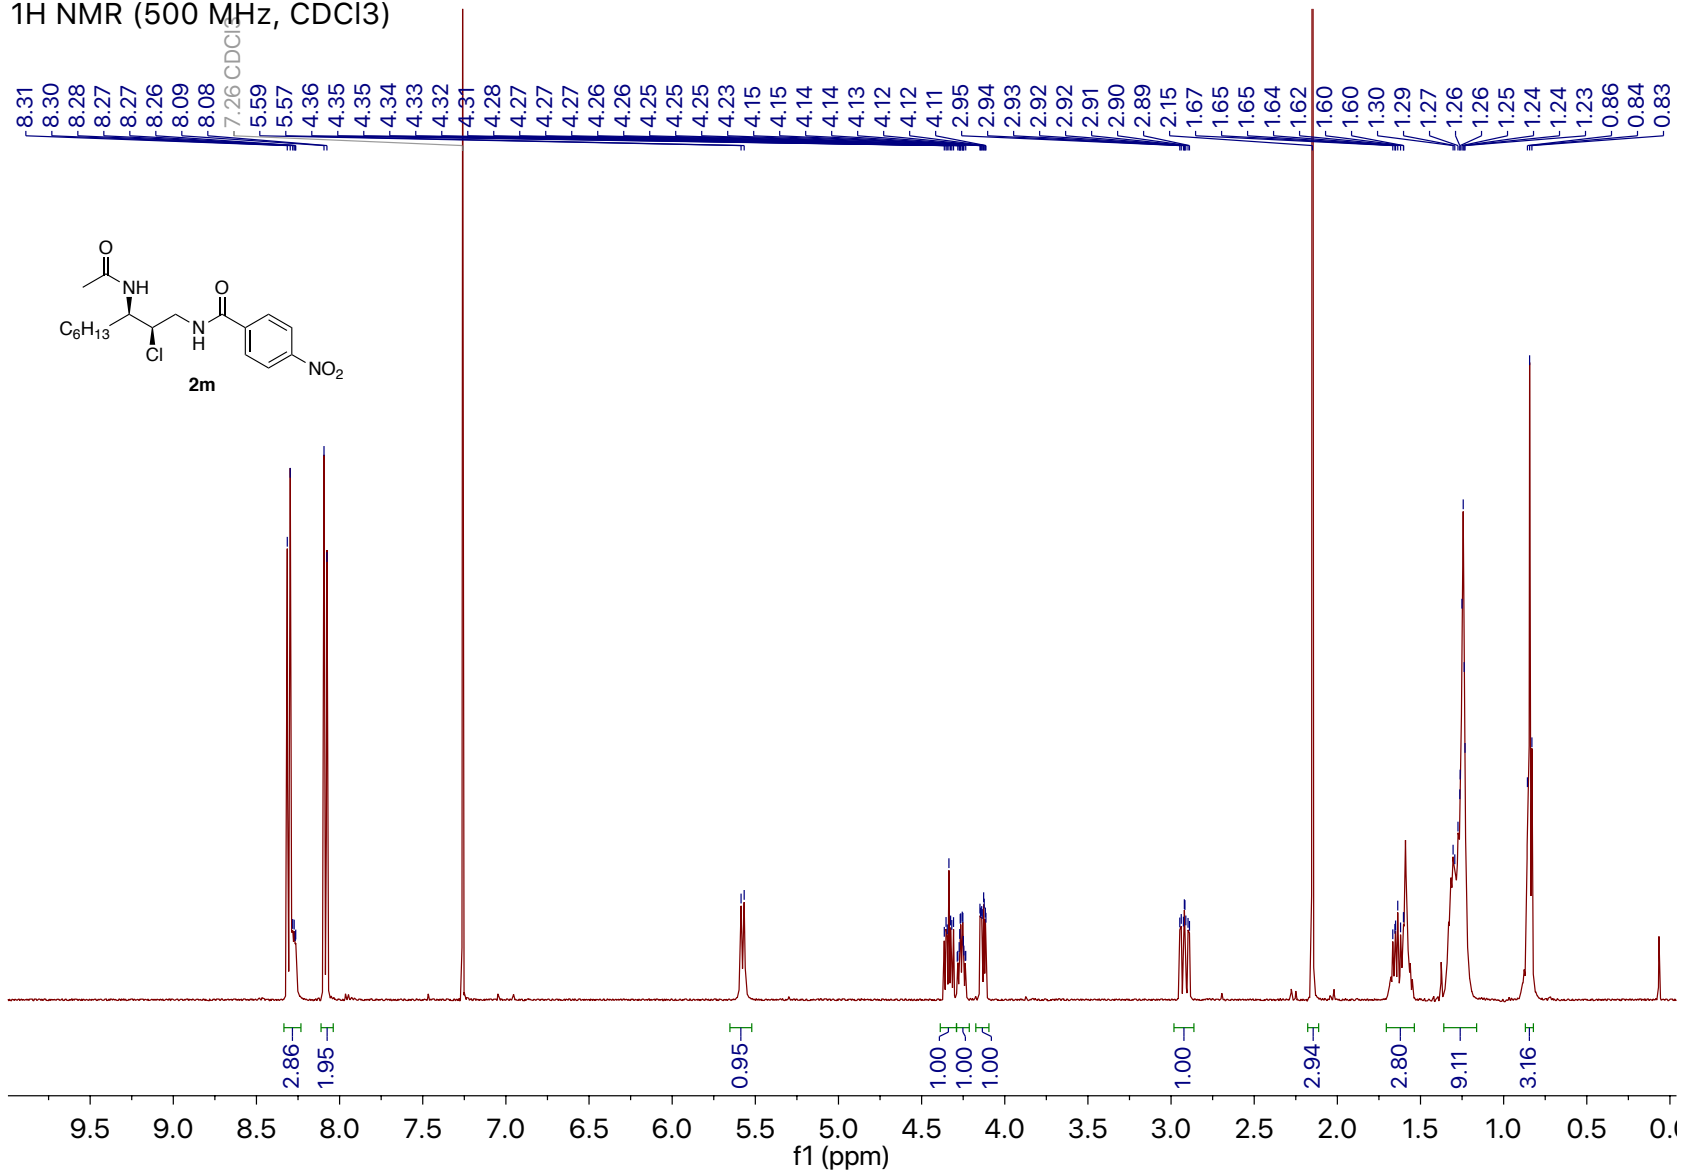



<sup>13</sup>C NMR (126 MHz, CDCl<sub>3</sub>)

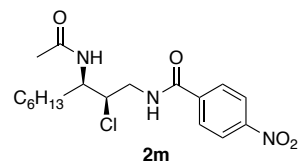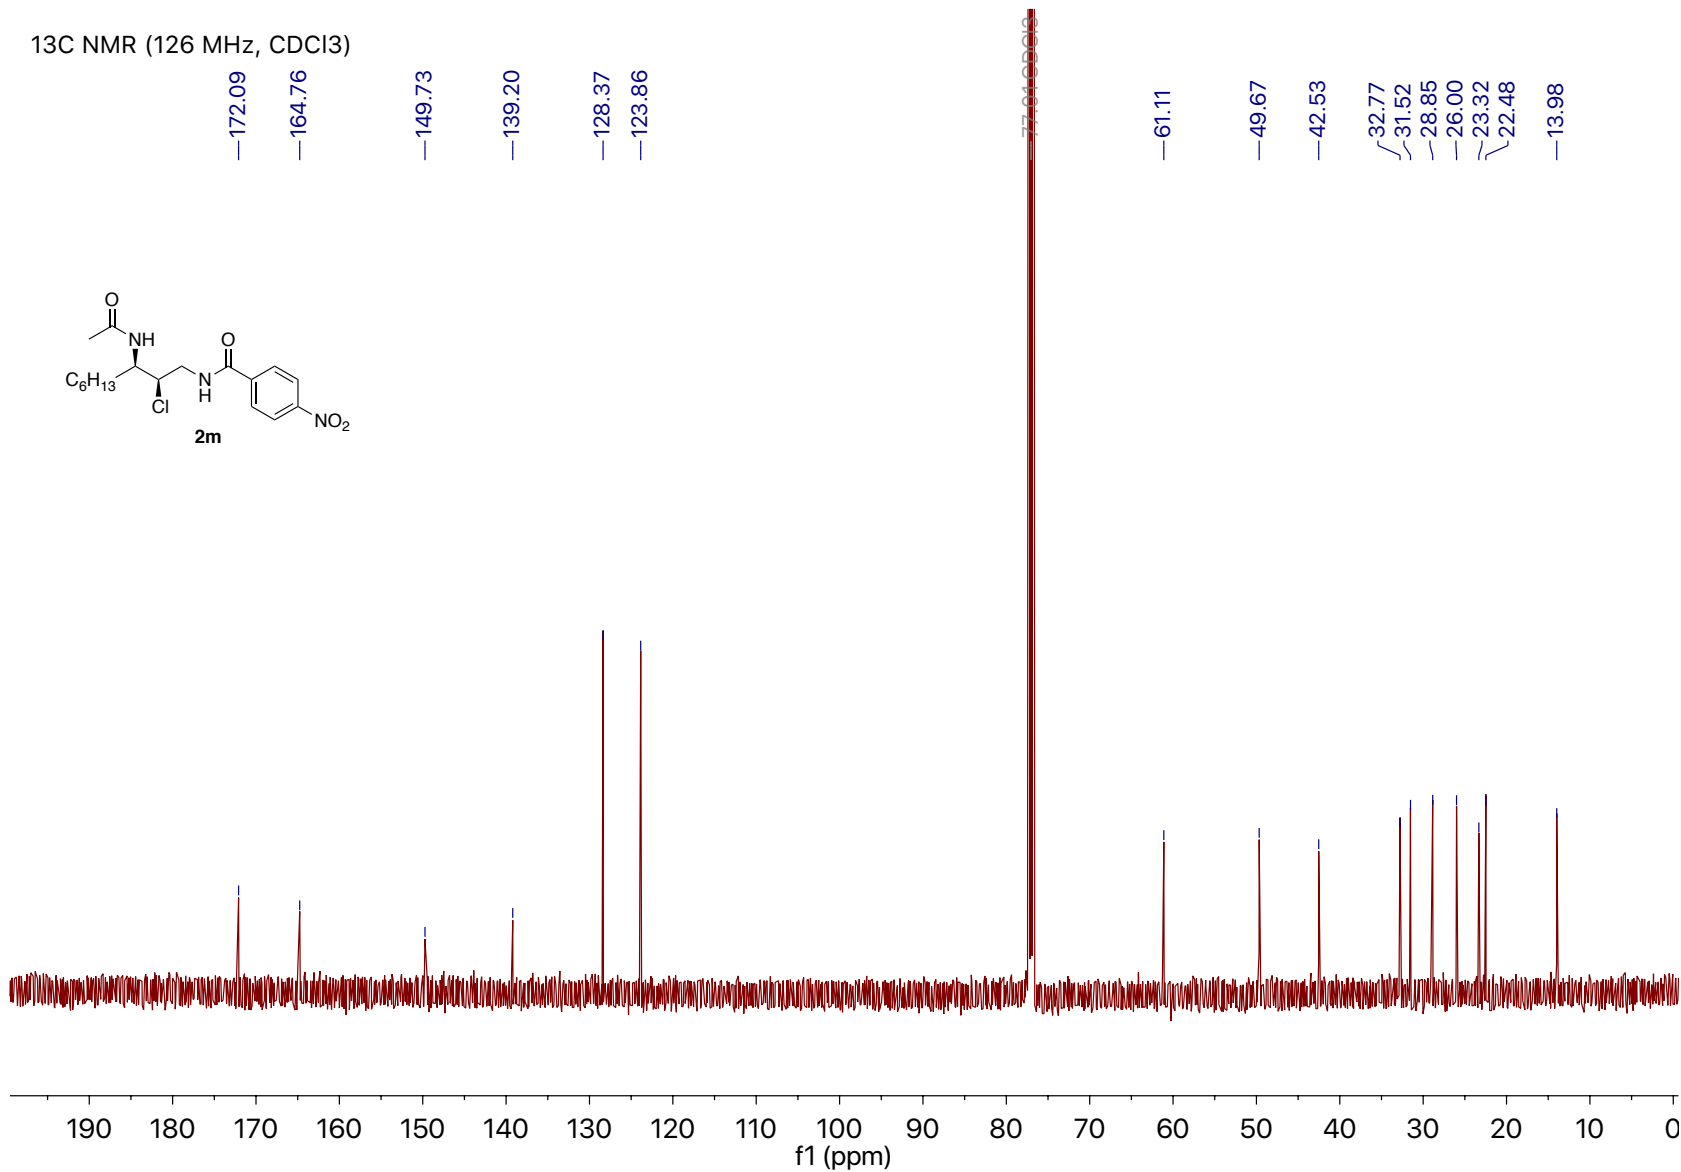

1H NMR (500 MHz, CDCl<sub>3</sub>)

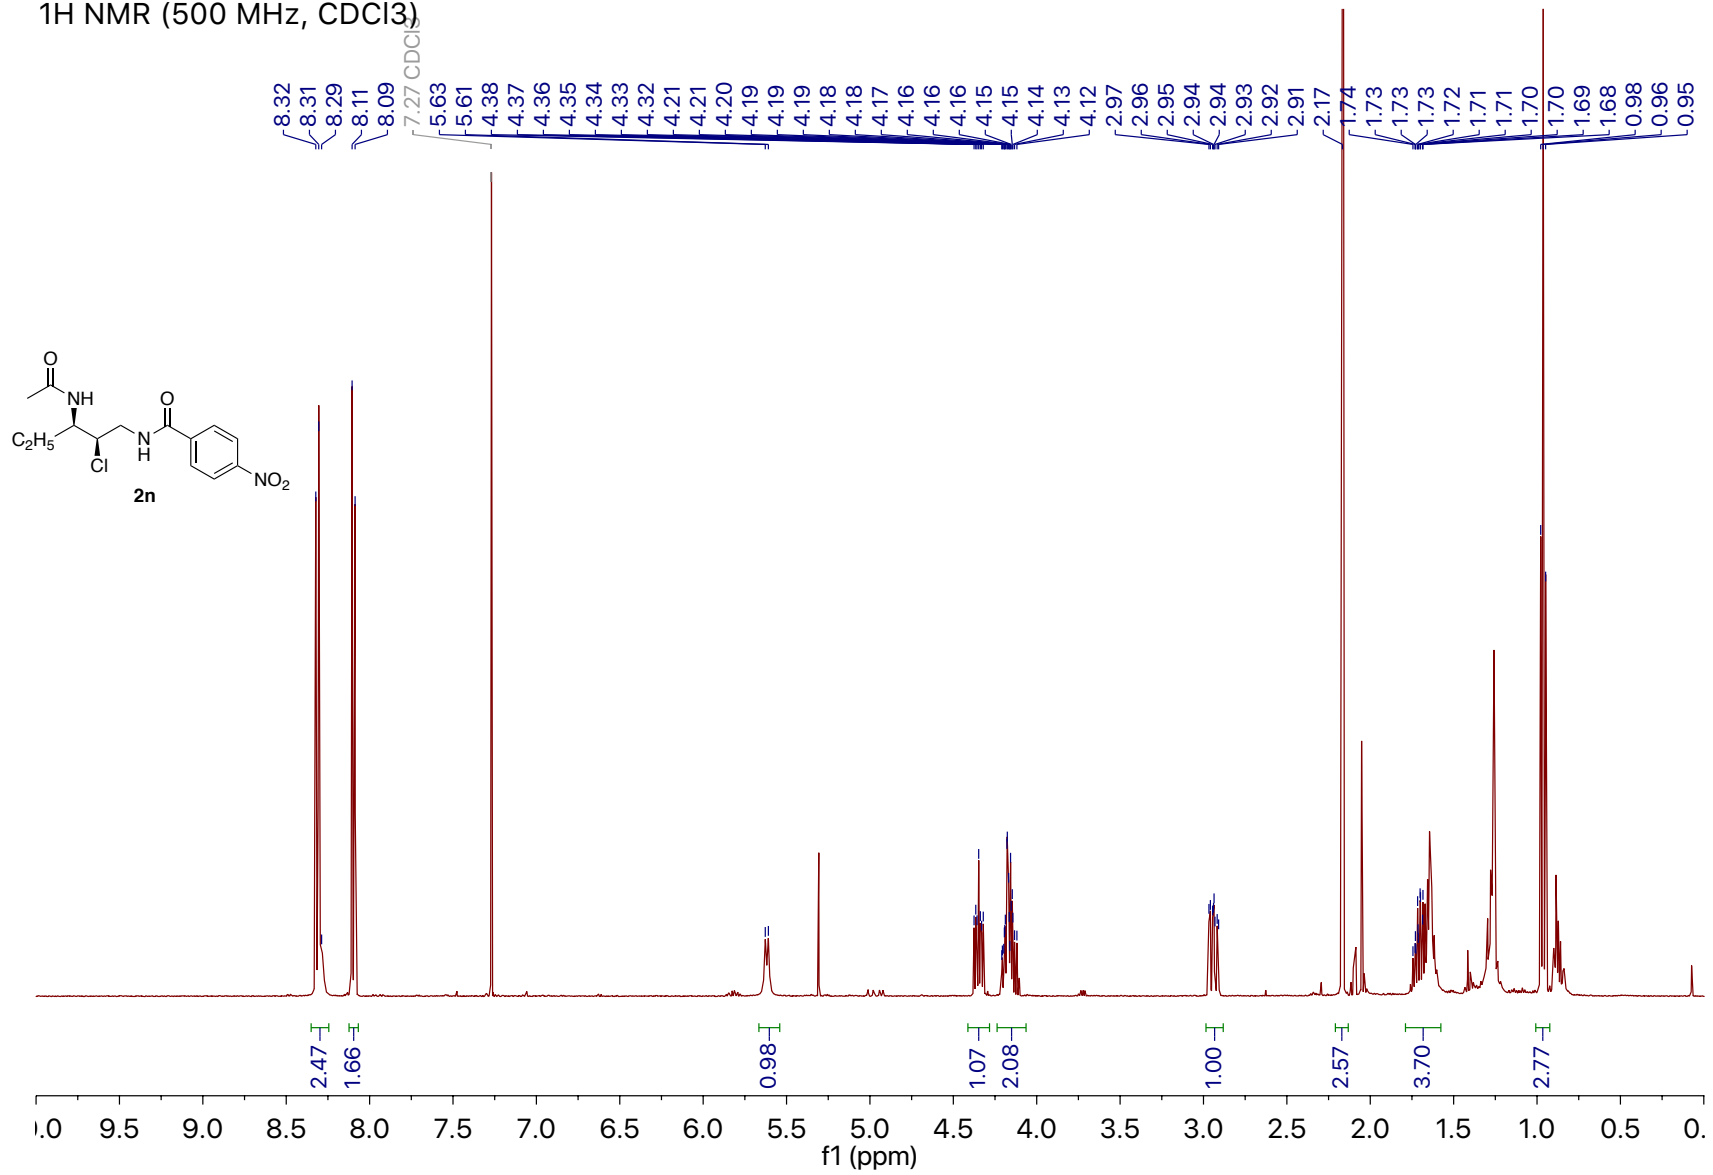

<sup>13</sup>C NMR (126 MHz, CDCl<sub>3</sub>)

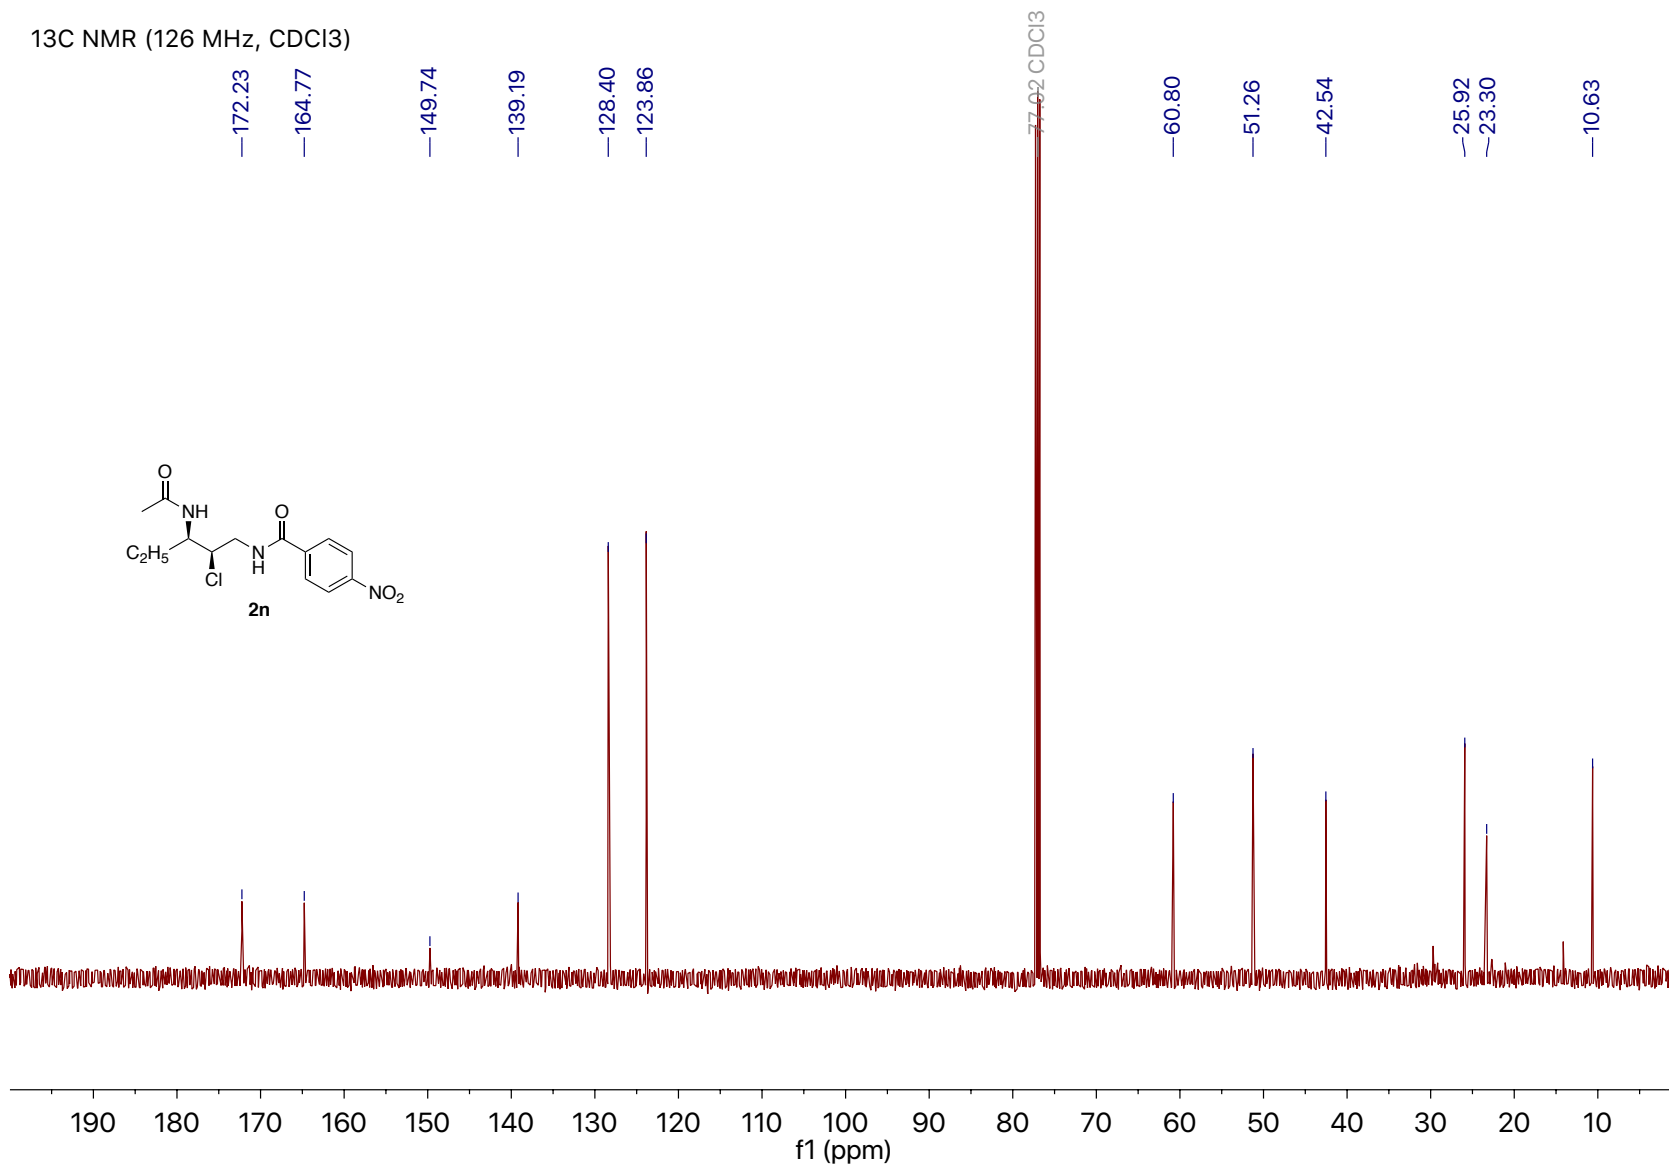

1H NMR (500 MHz, CDCl3)

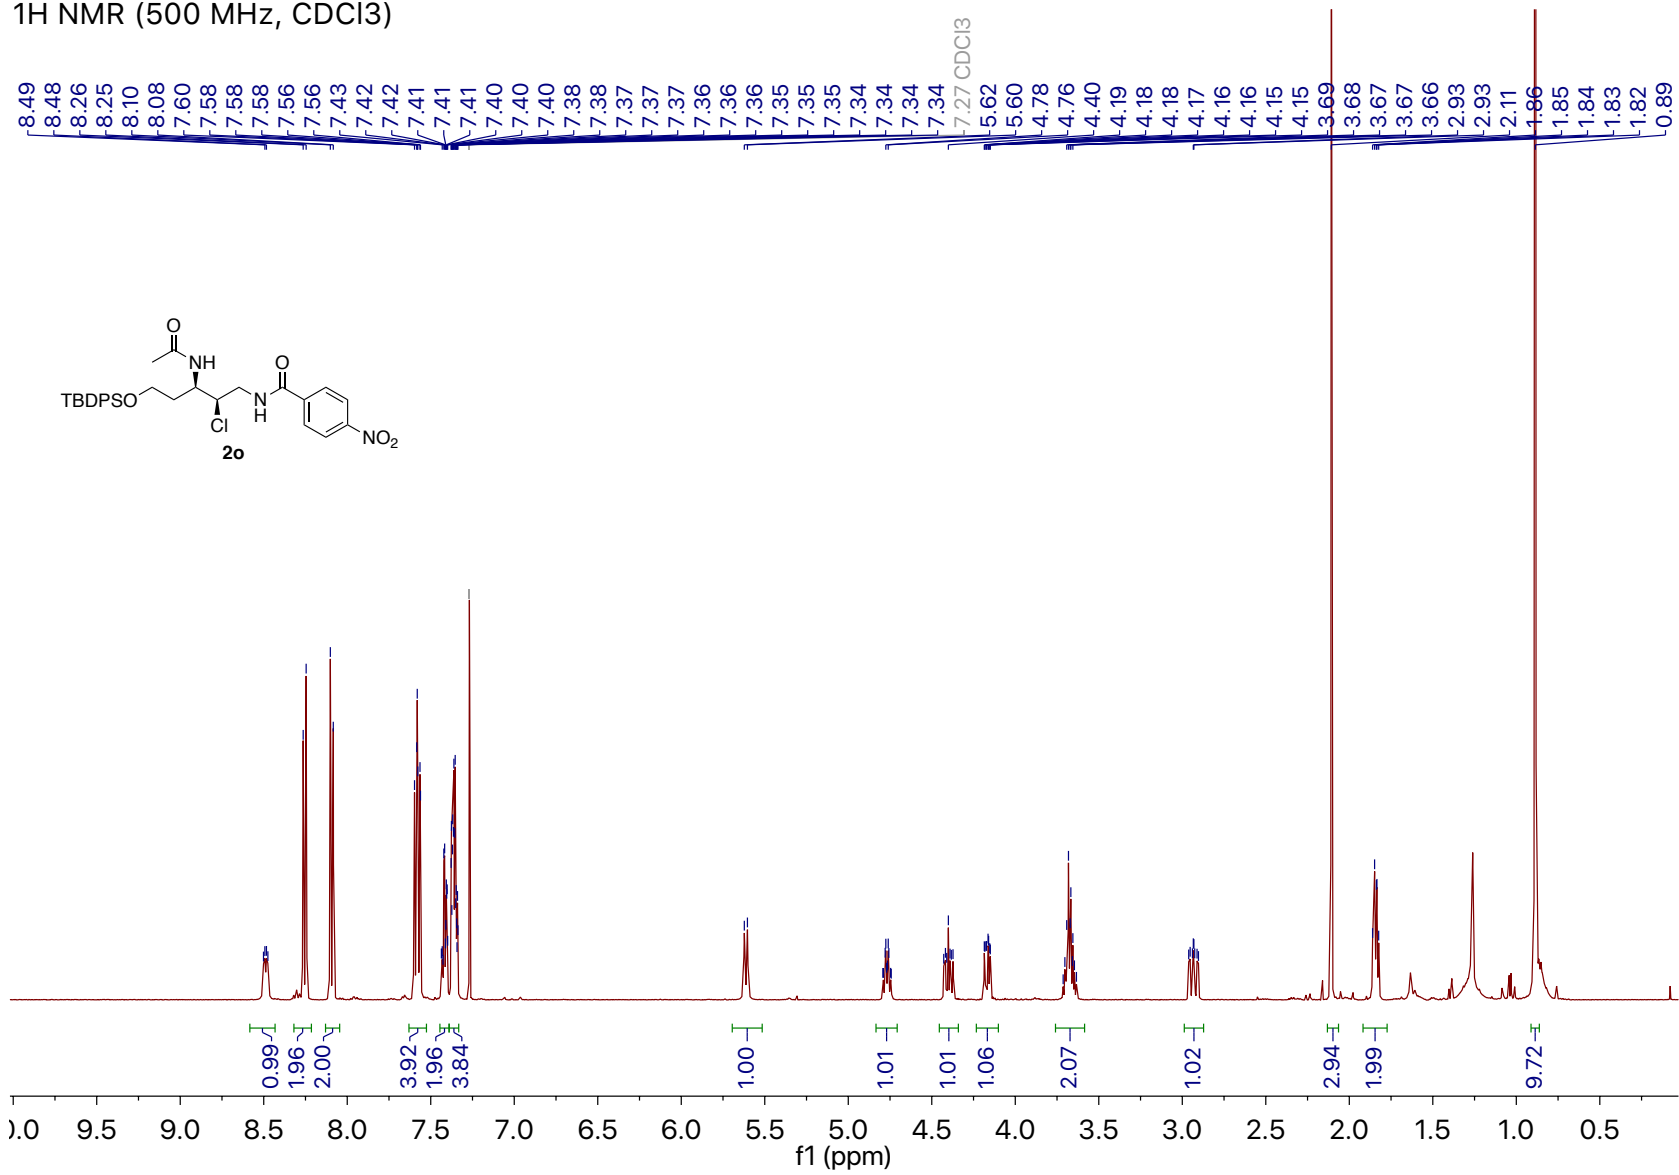

<sup>13</sup>C NMR (125 MHz, CDCl<sub>3</sub>)

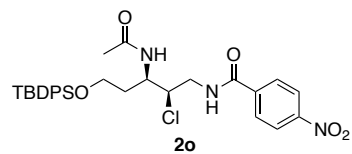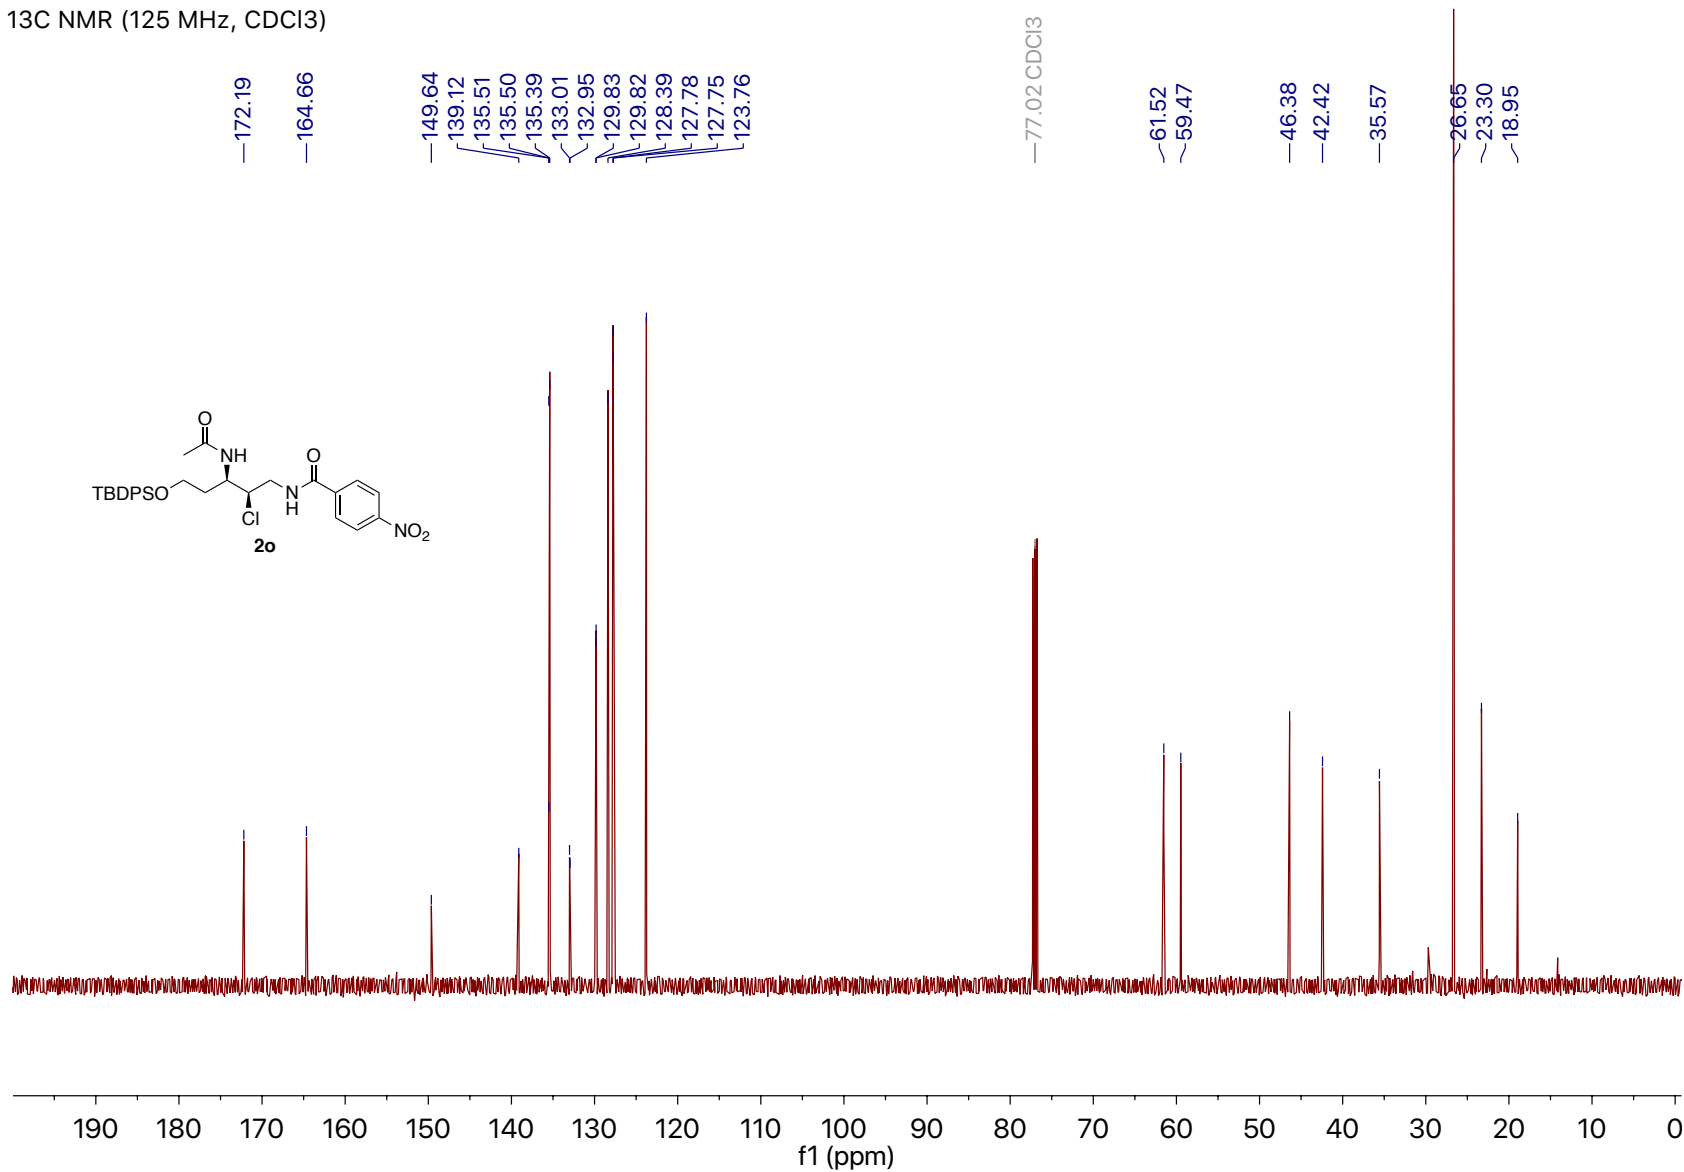

1H NMR (500 MHz, CDCl3)

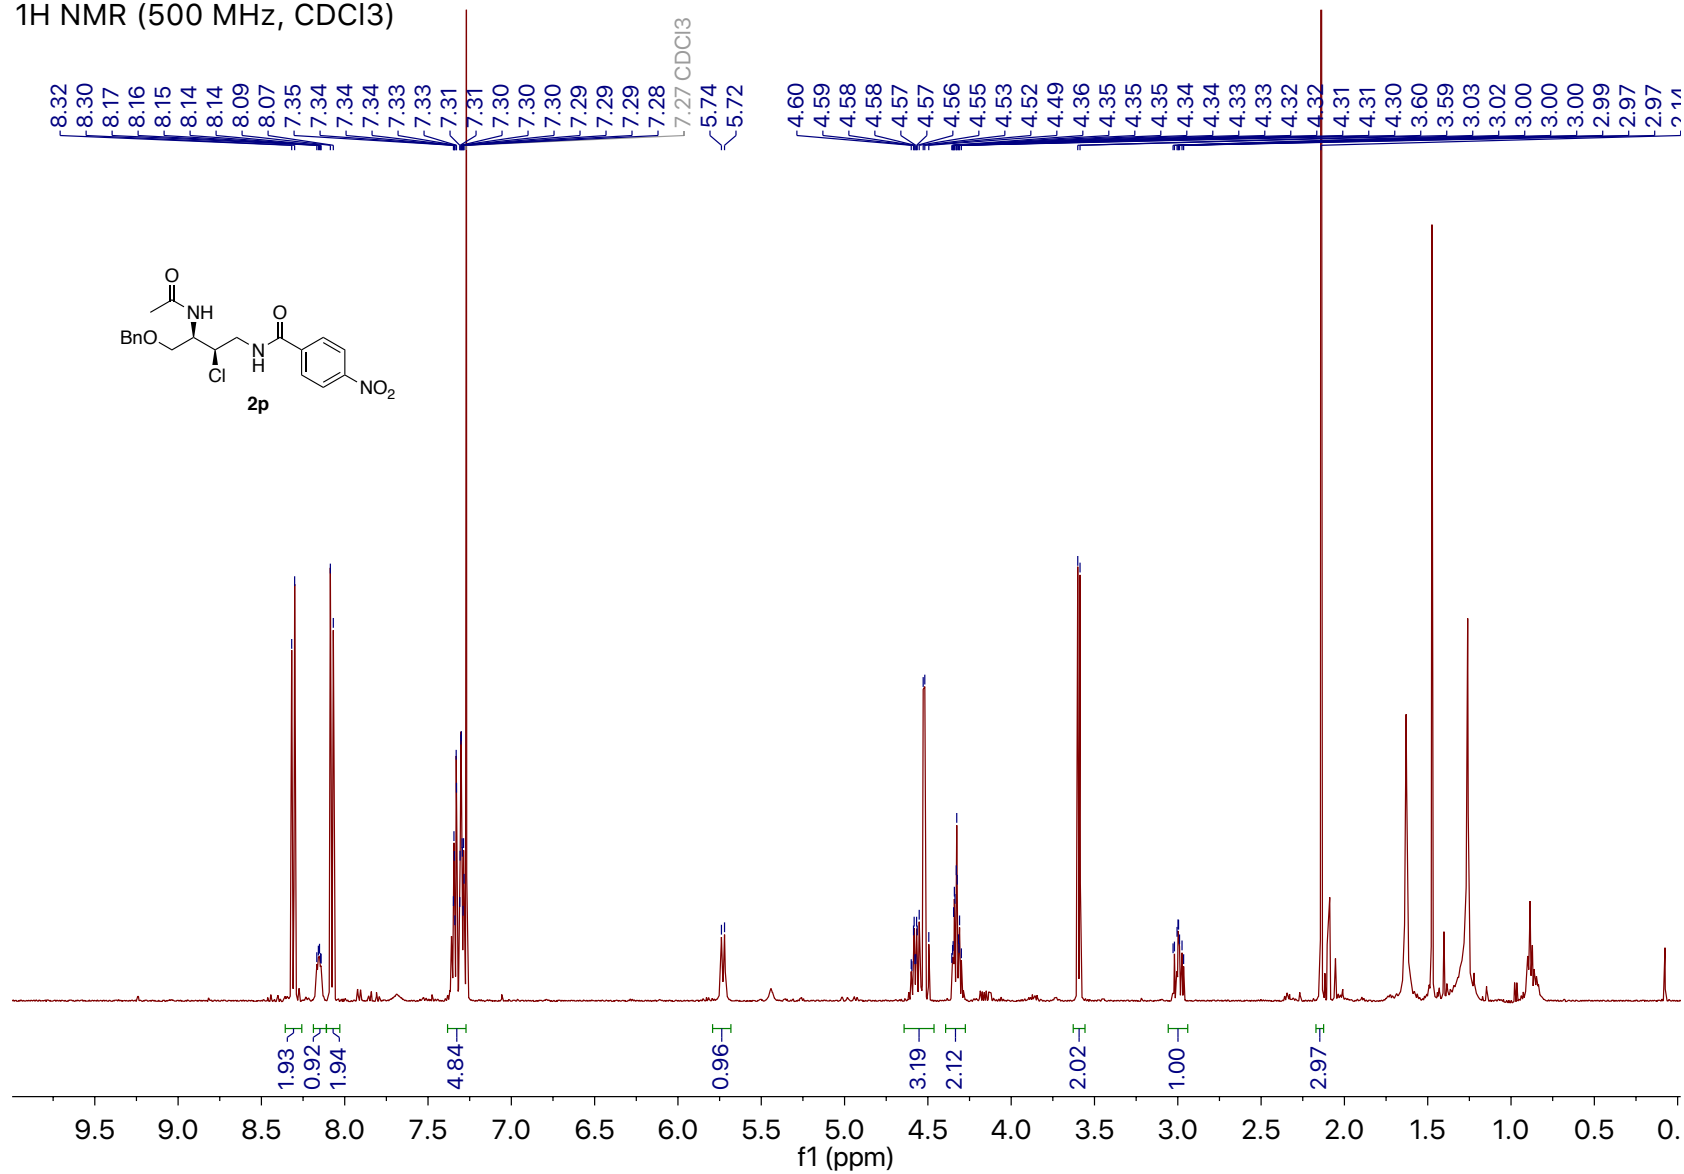

<sup>13</sup>C NMR (126 MHz, CDCl<sub>3</sub>)

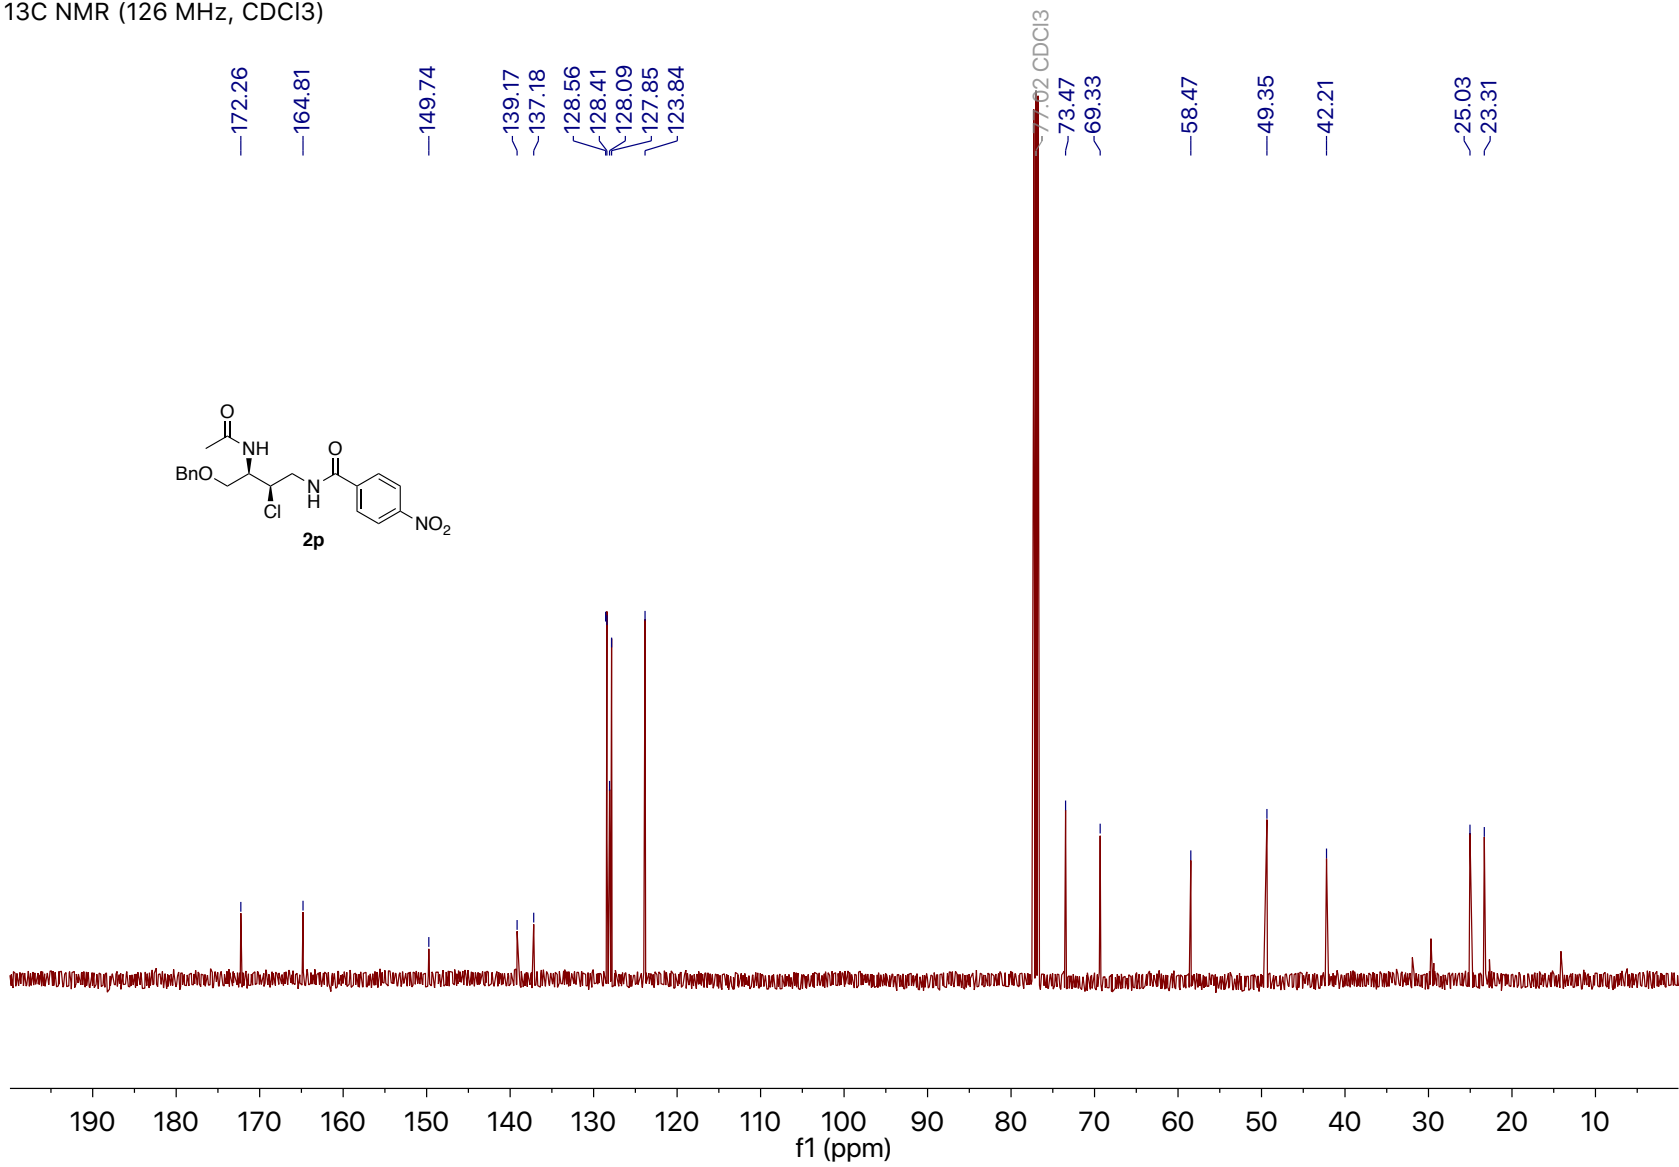

1H NMR (500 MHz, CDCl3)

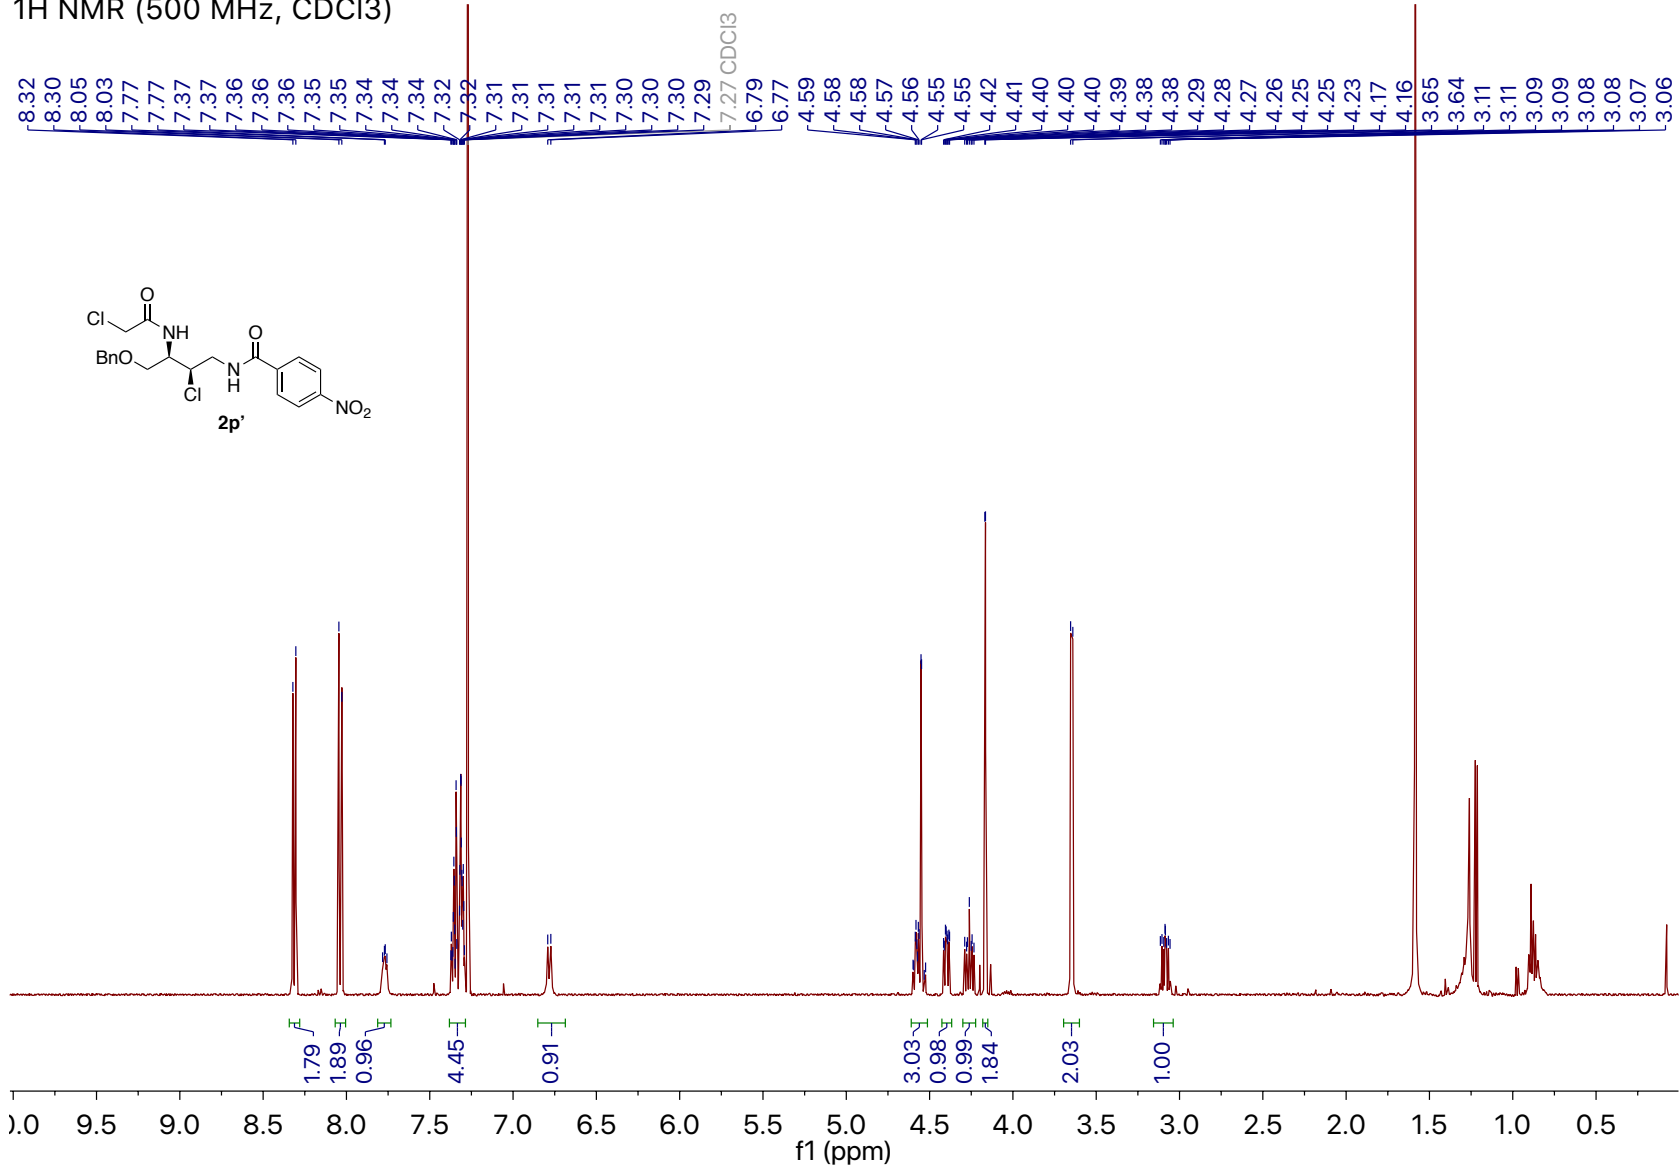



<sup>13</sup>C NMR (126 MHz, CDCl<sub>3</sub>)

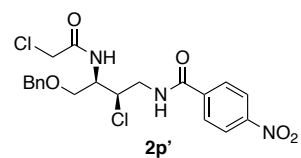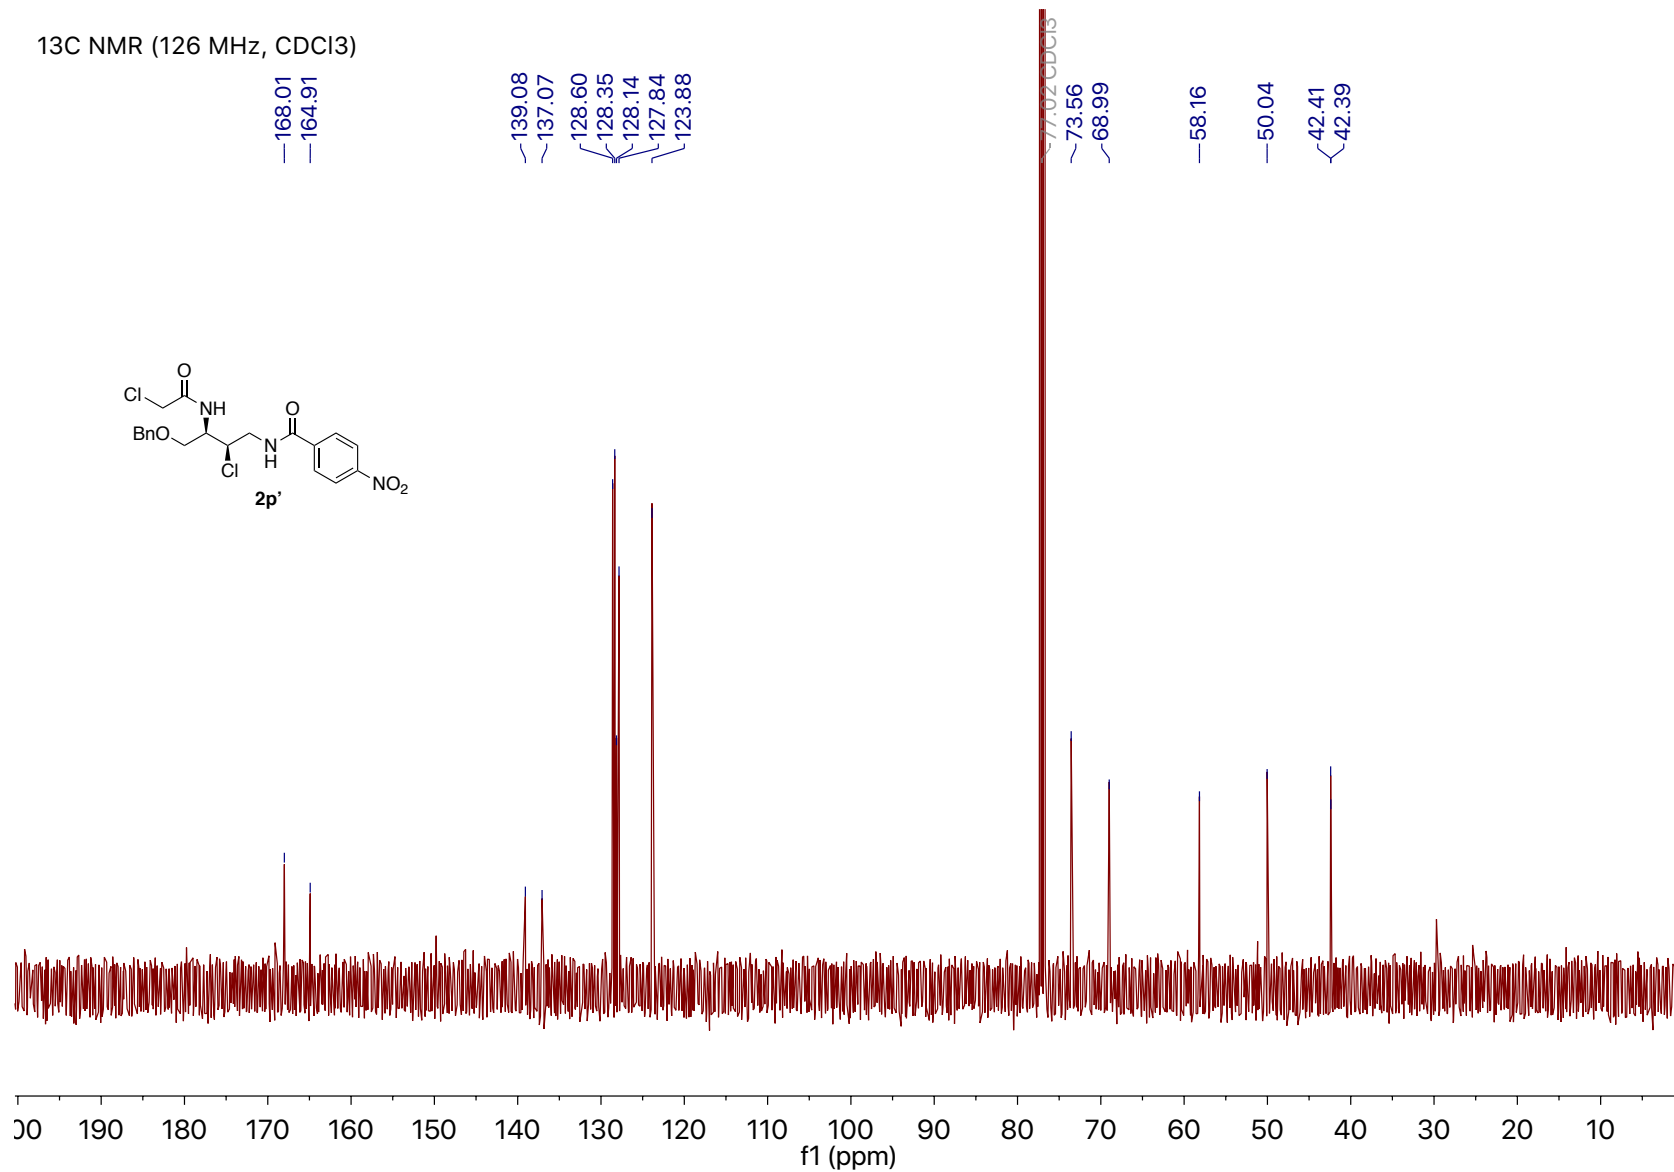

1H NMR (500 MHz, (CD3)2SO)

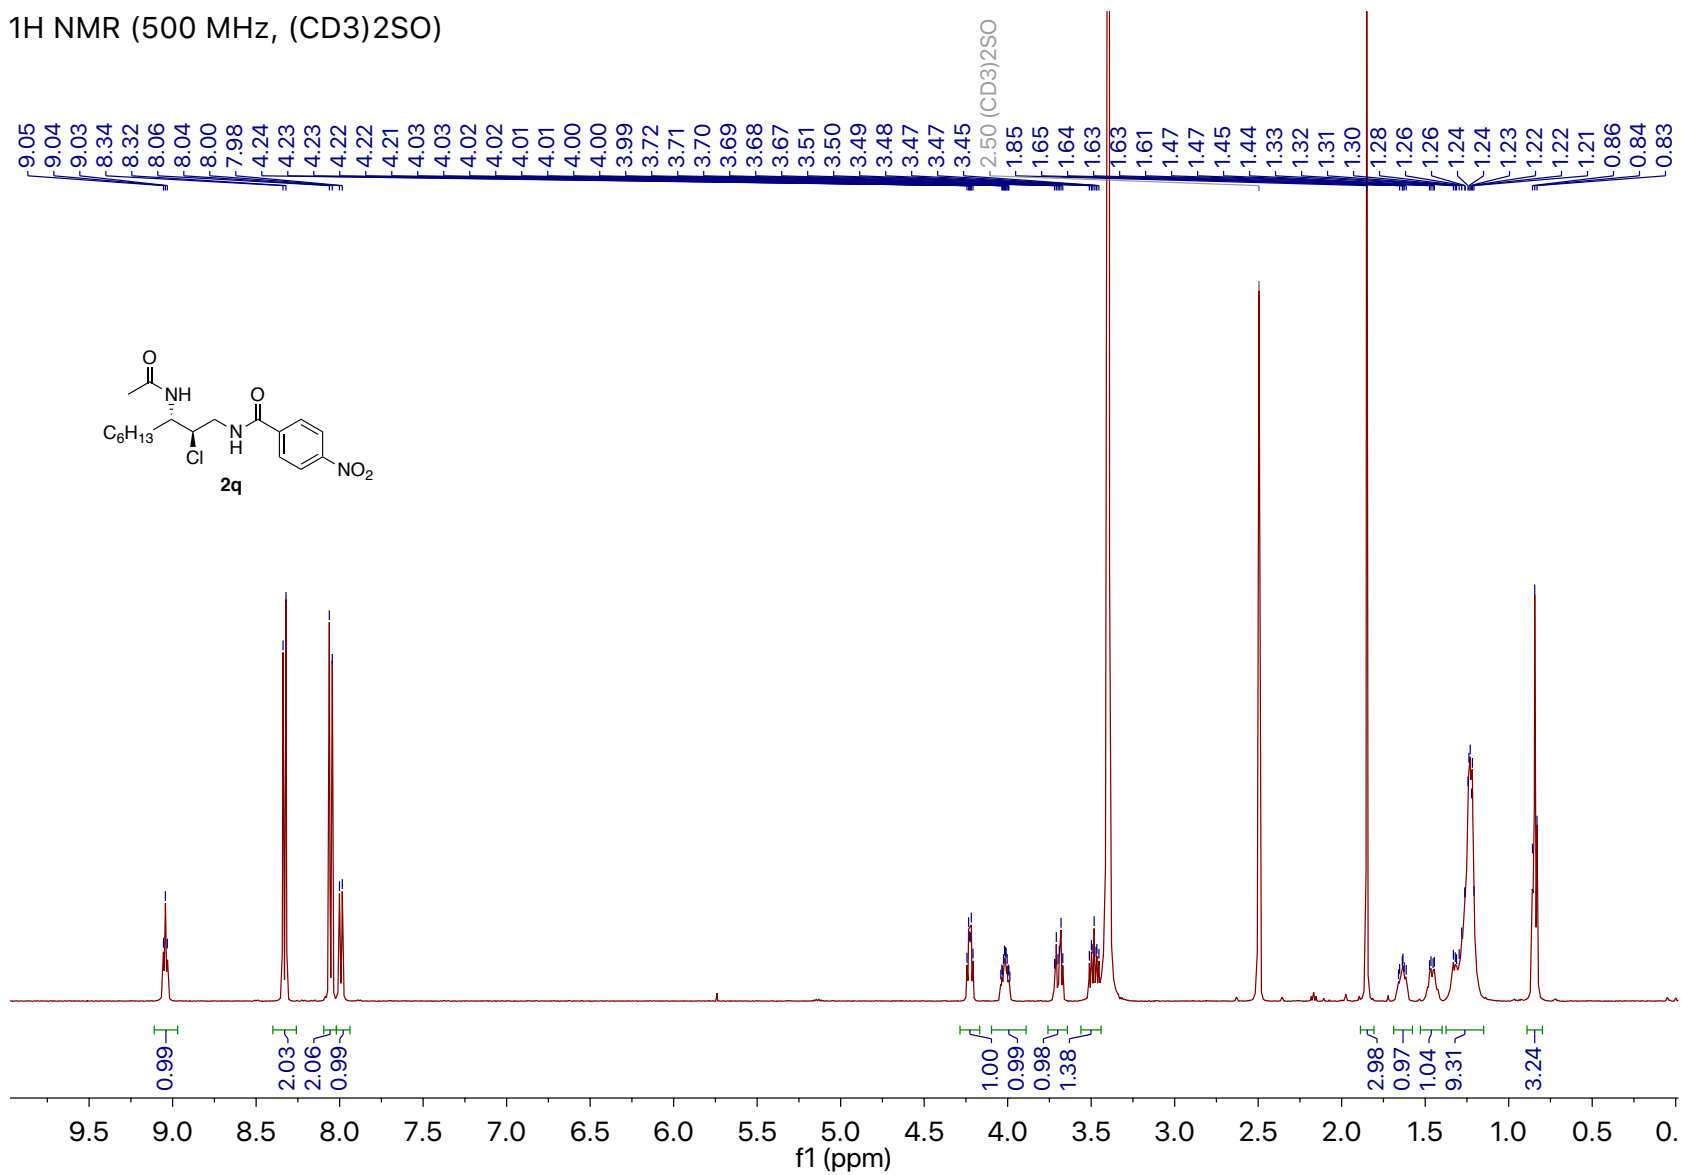

<sup>13</sup>C NMR (126 MHz, (CD<sub>3</sub>)<sub>2</sub>SO)

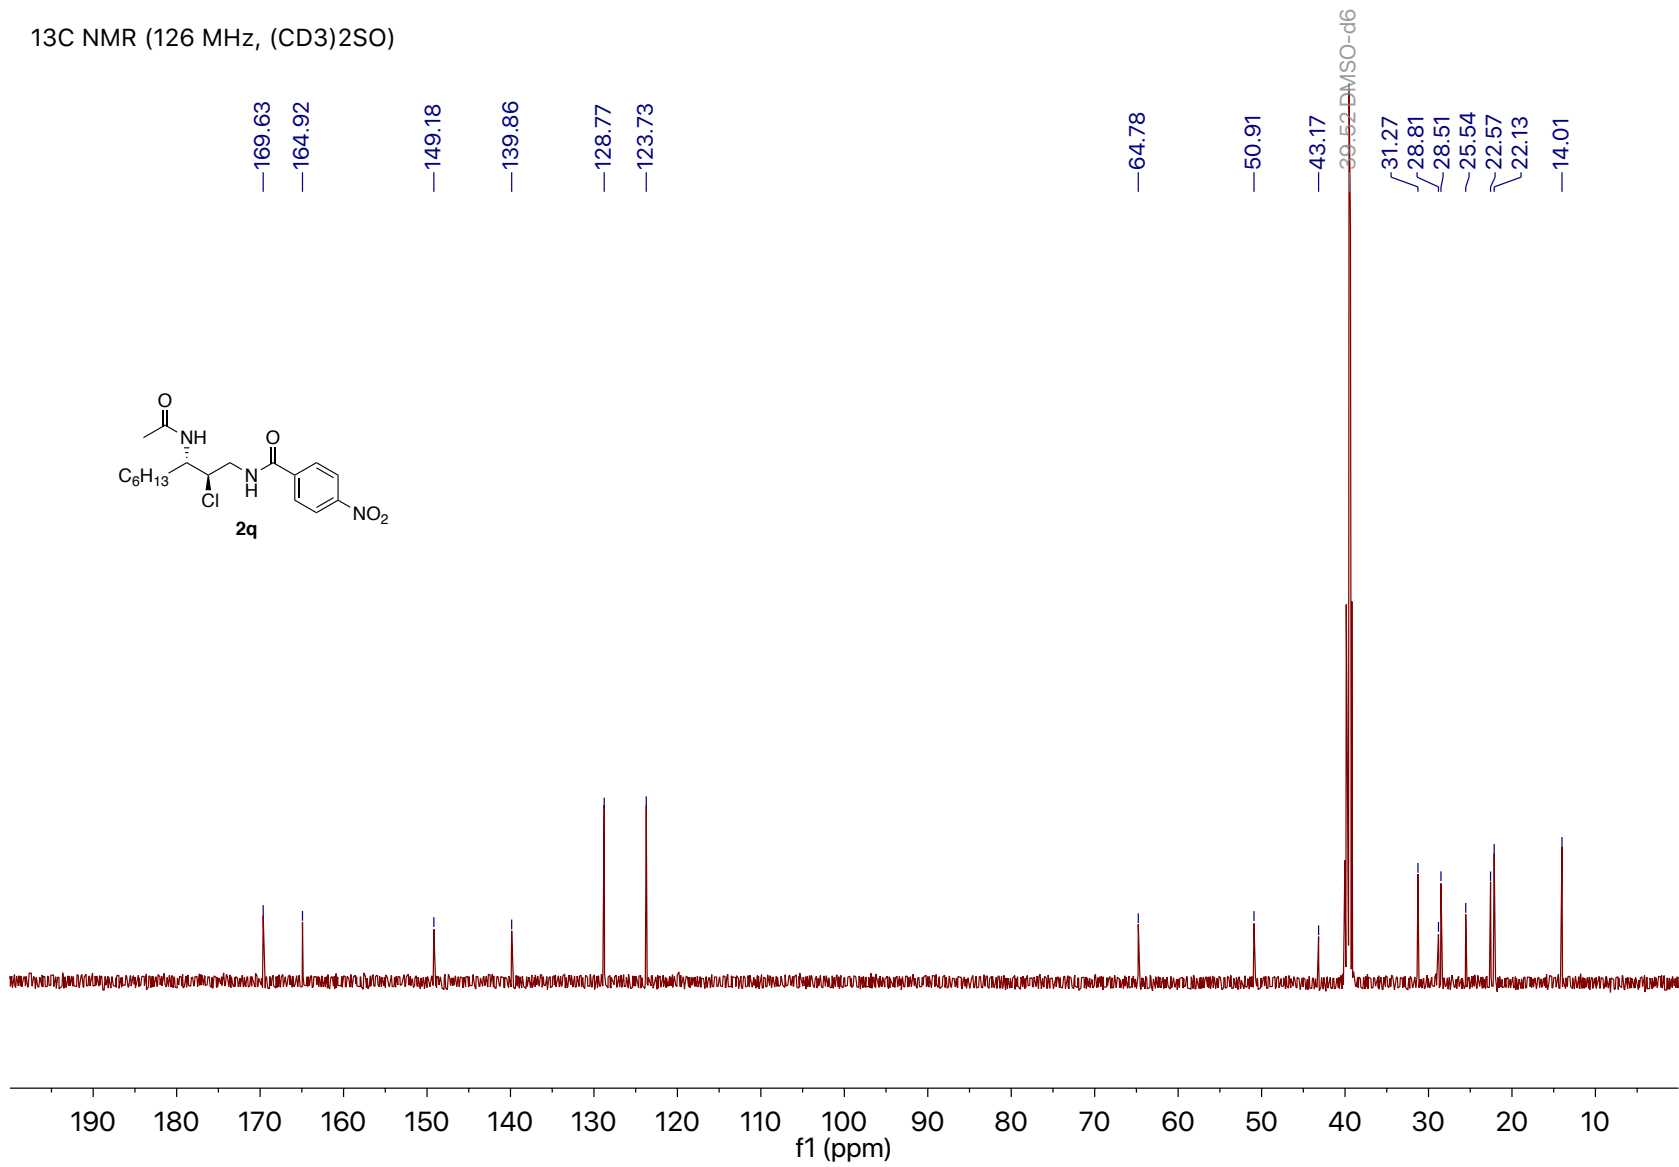

1H NMR (500 MHz, CDCl3)

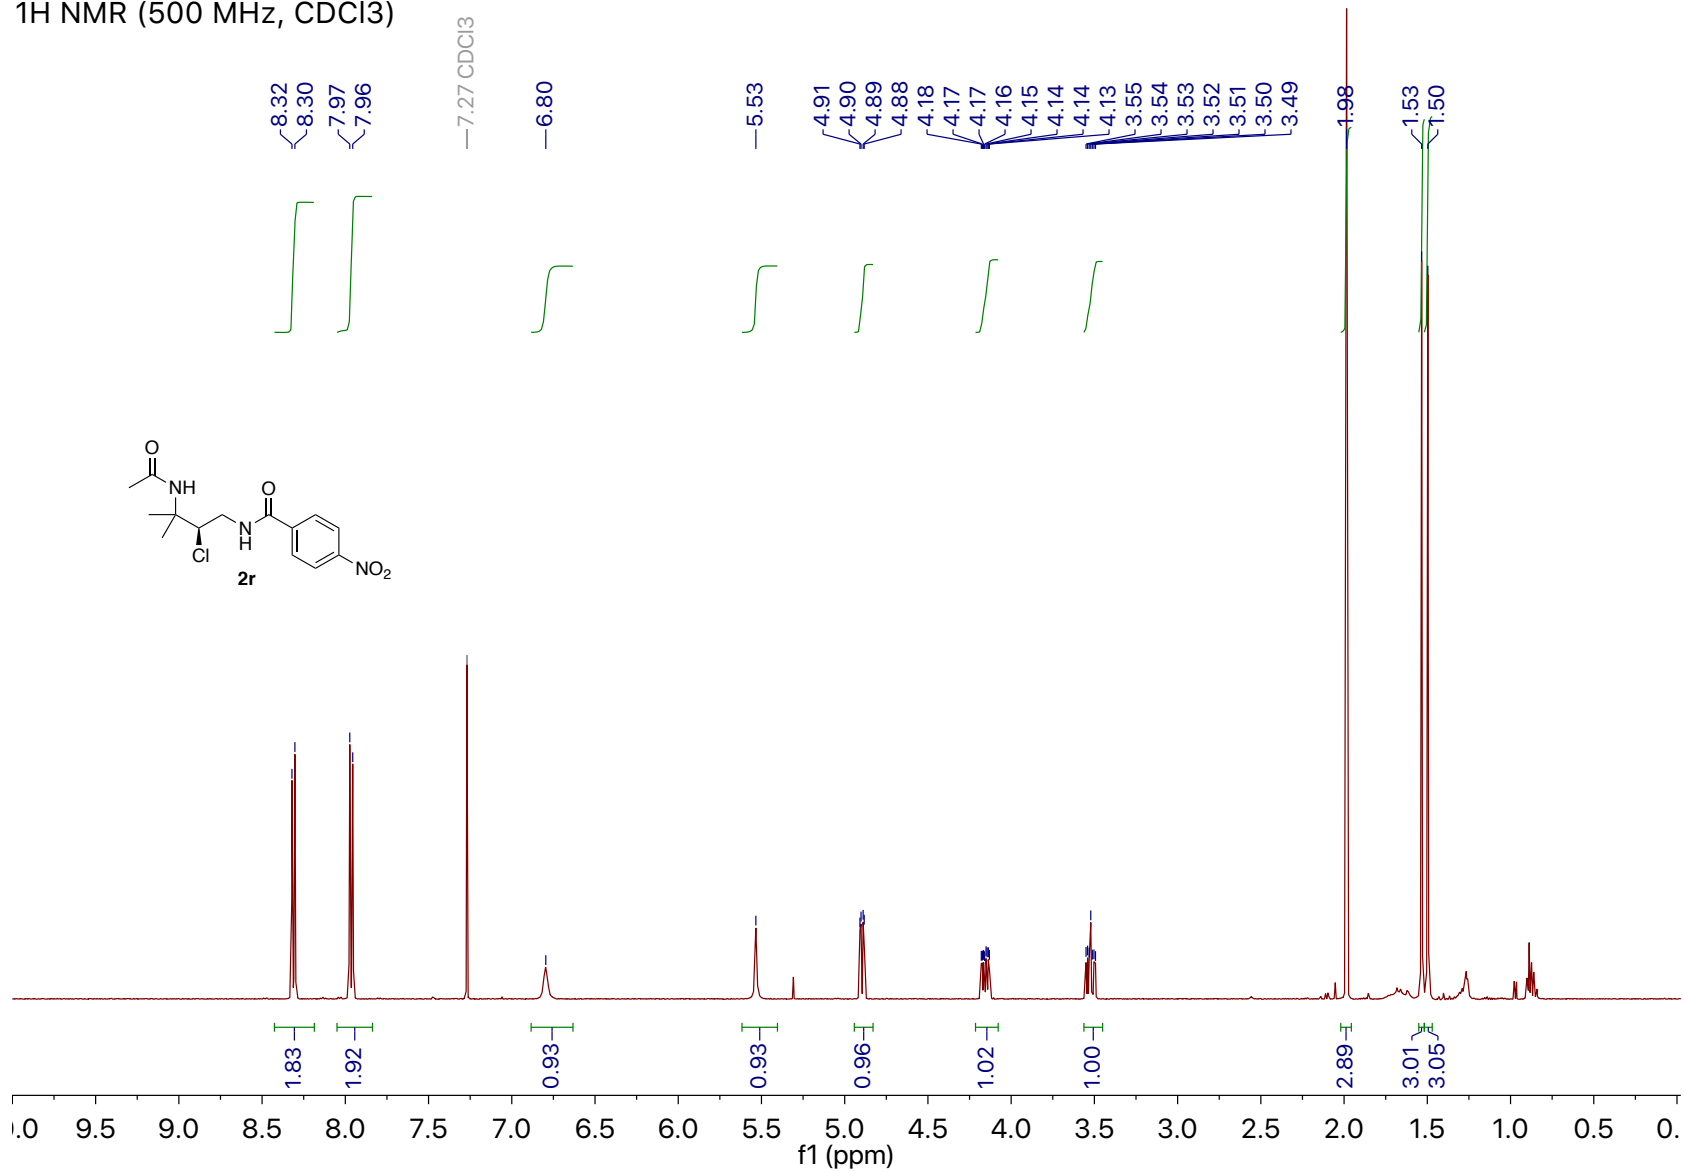

13C NMR (125 MHz, CDCl3)

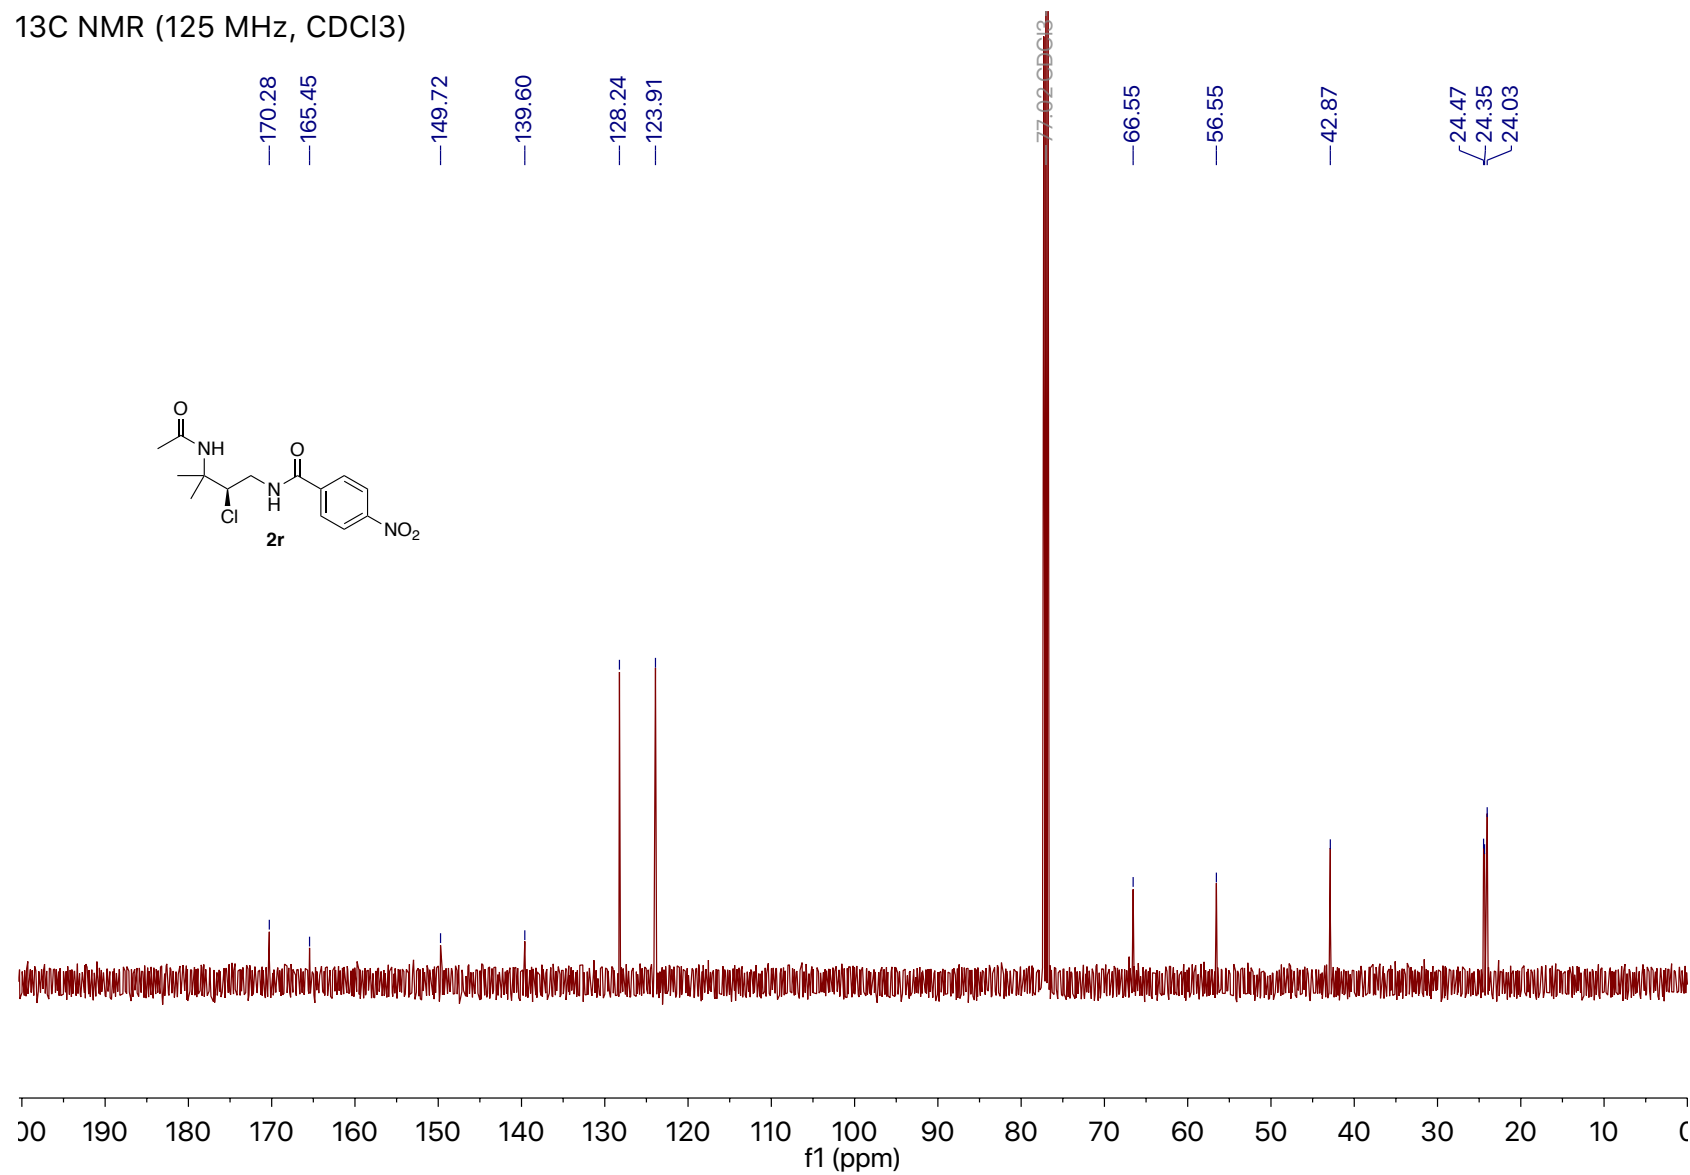

1H NMR (500 MHz, CDCl3)

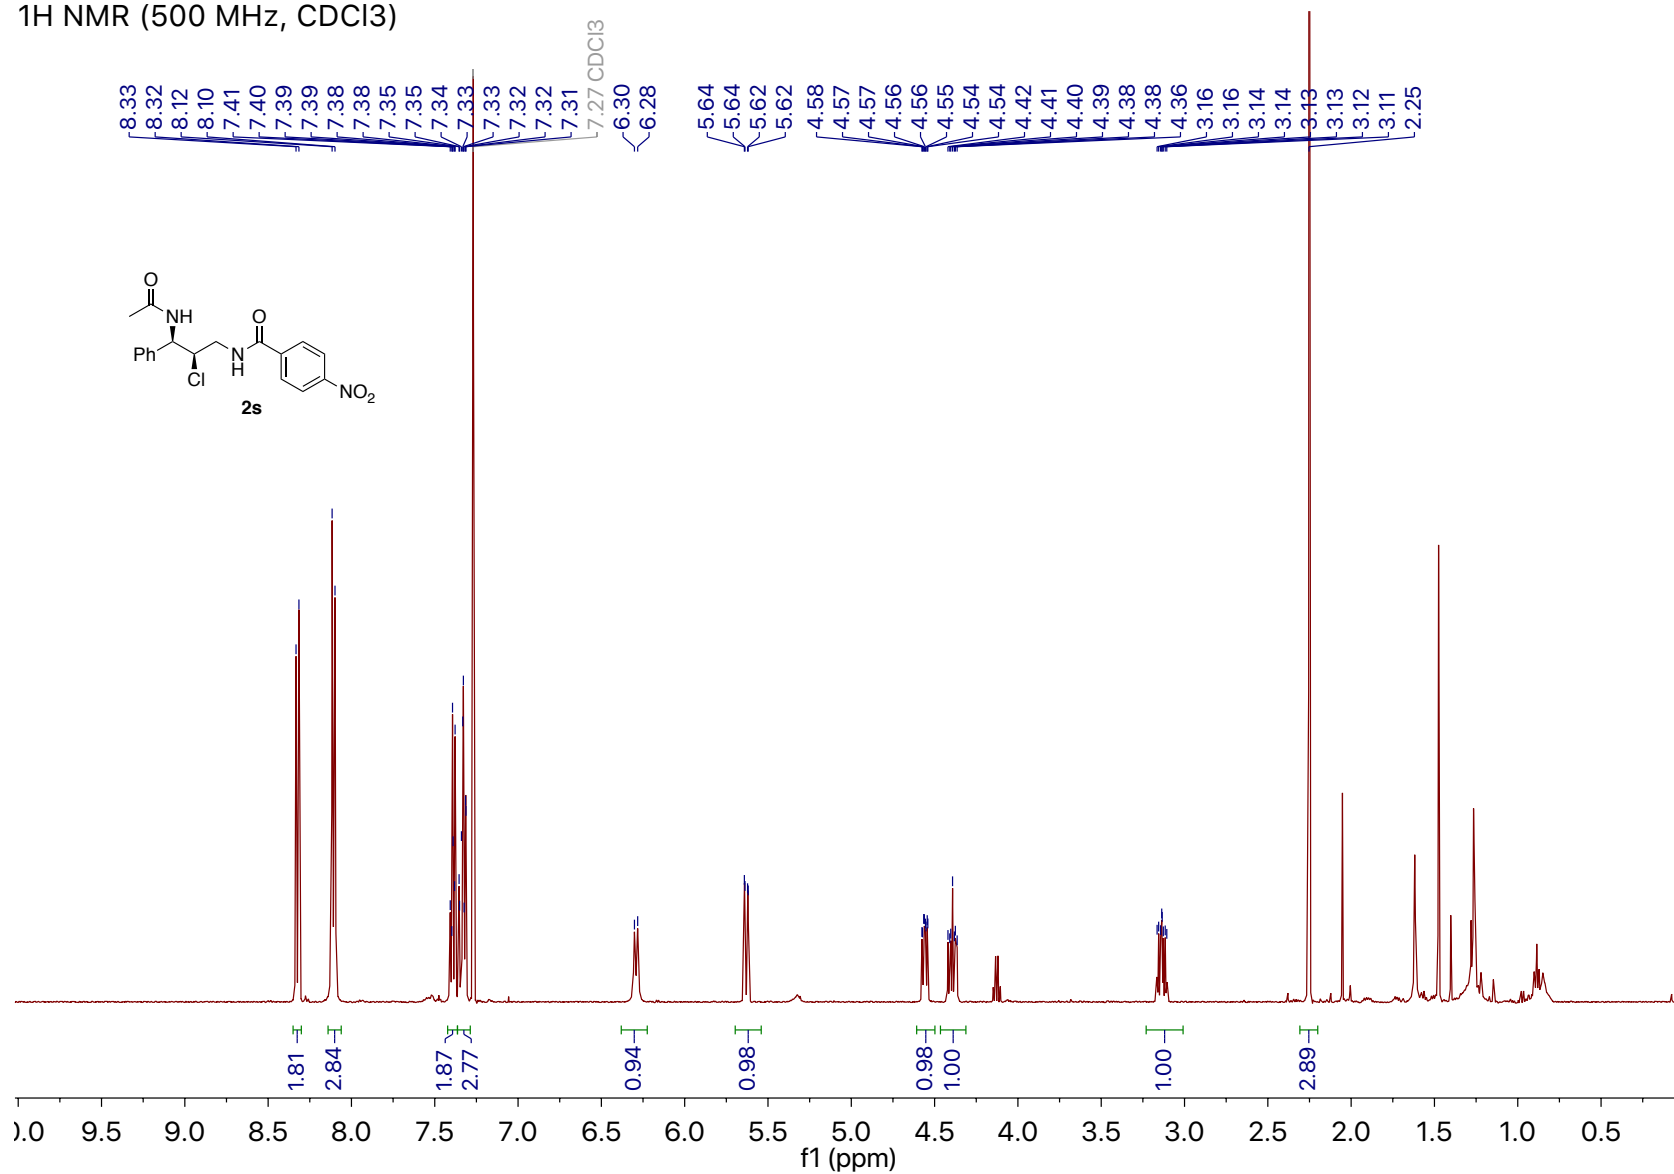

13C NMR (126 MHz, CDCl3)

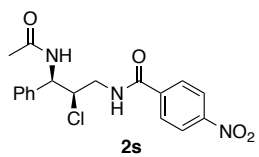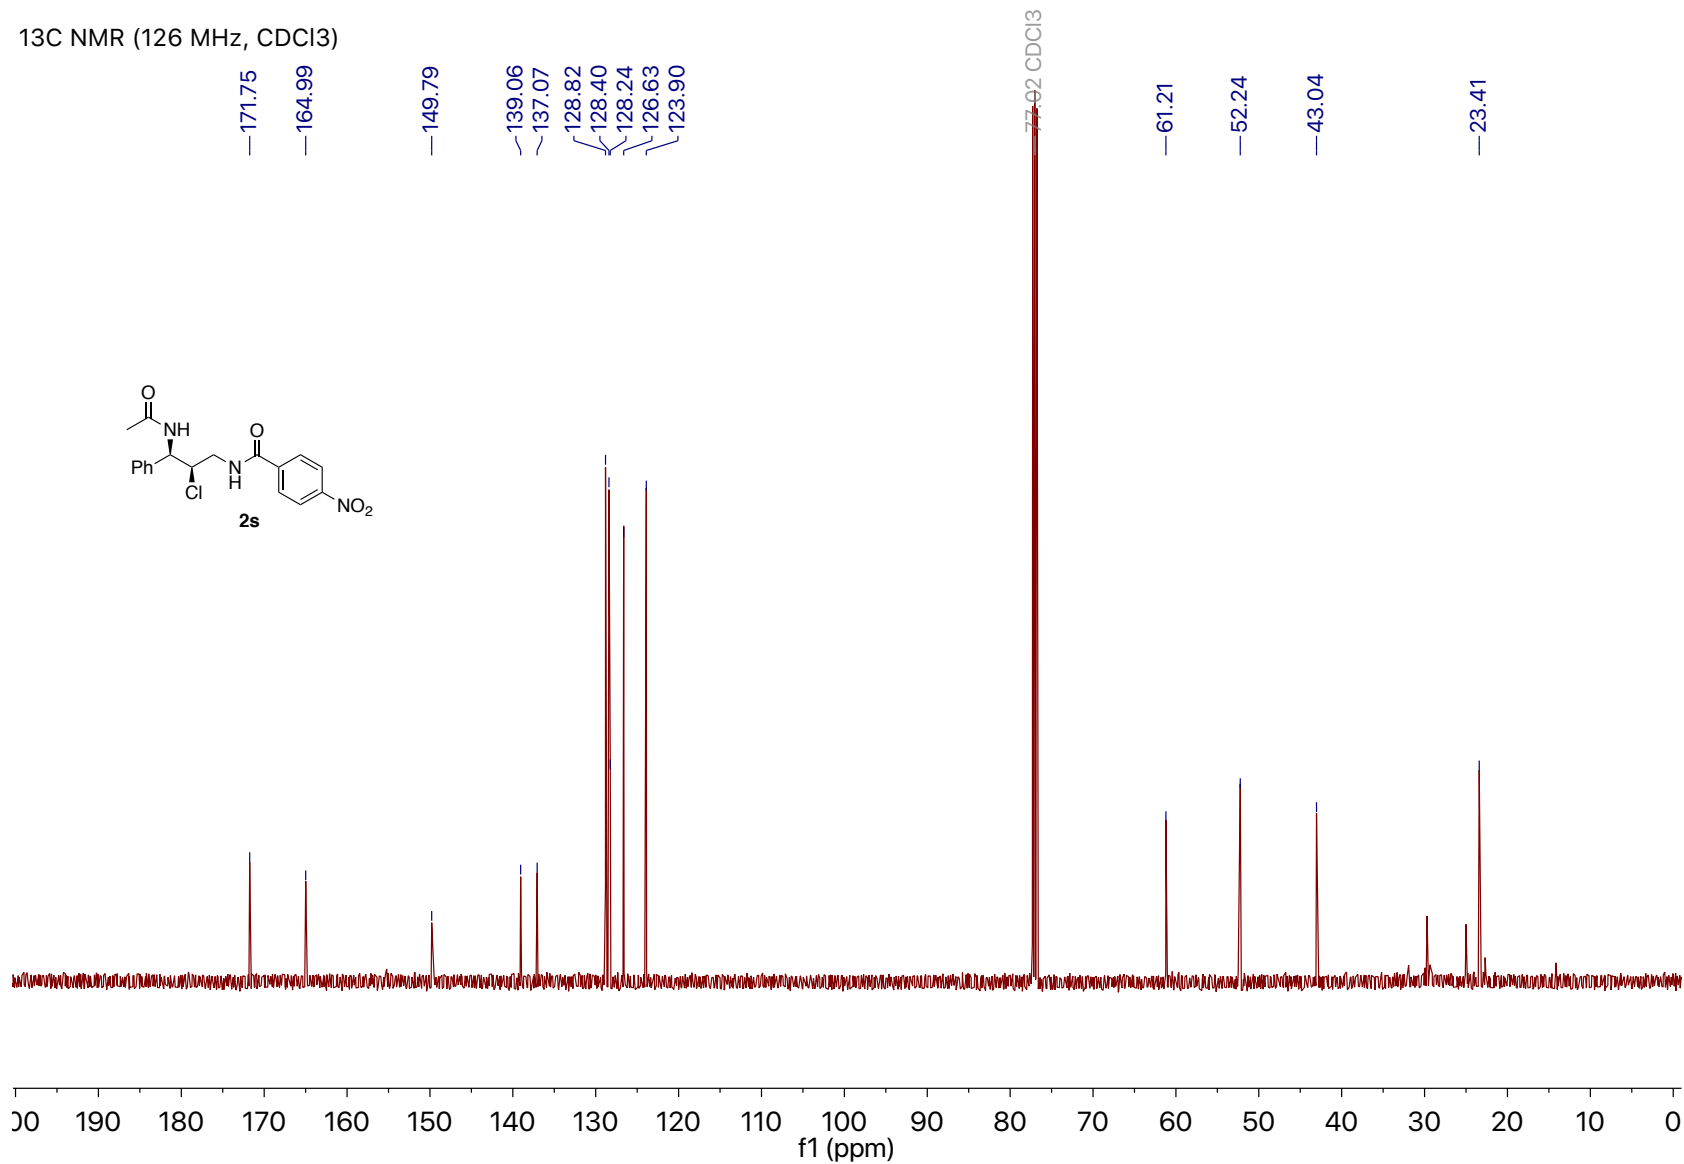

1H NMR (500 MHz, CDCl3)

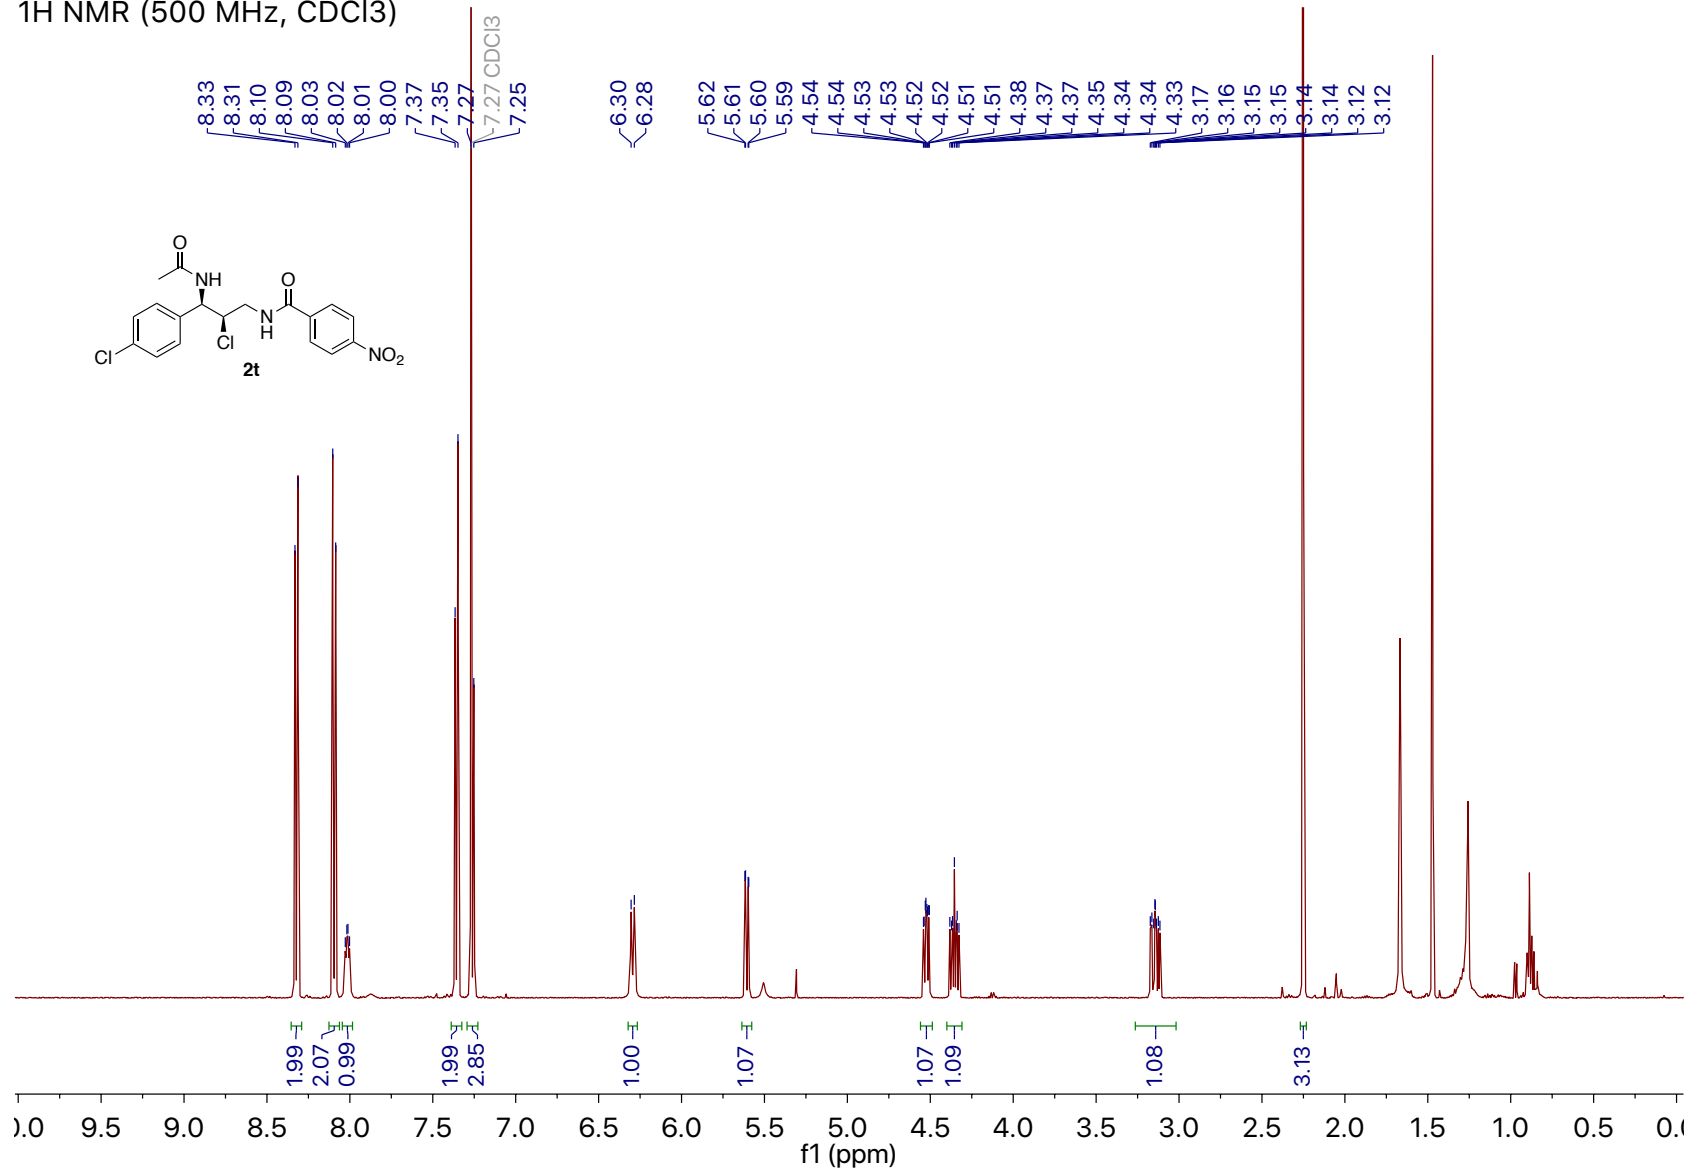



<sup>13</sup>C NMR (126 MHz, CDCl<sub>3</sub>)

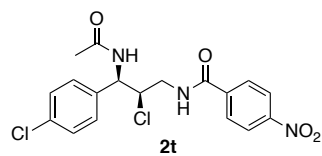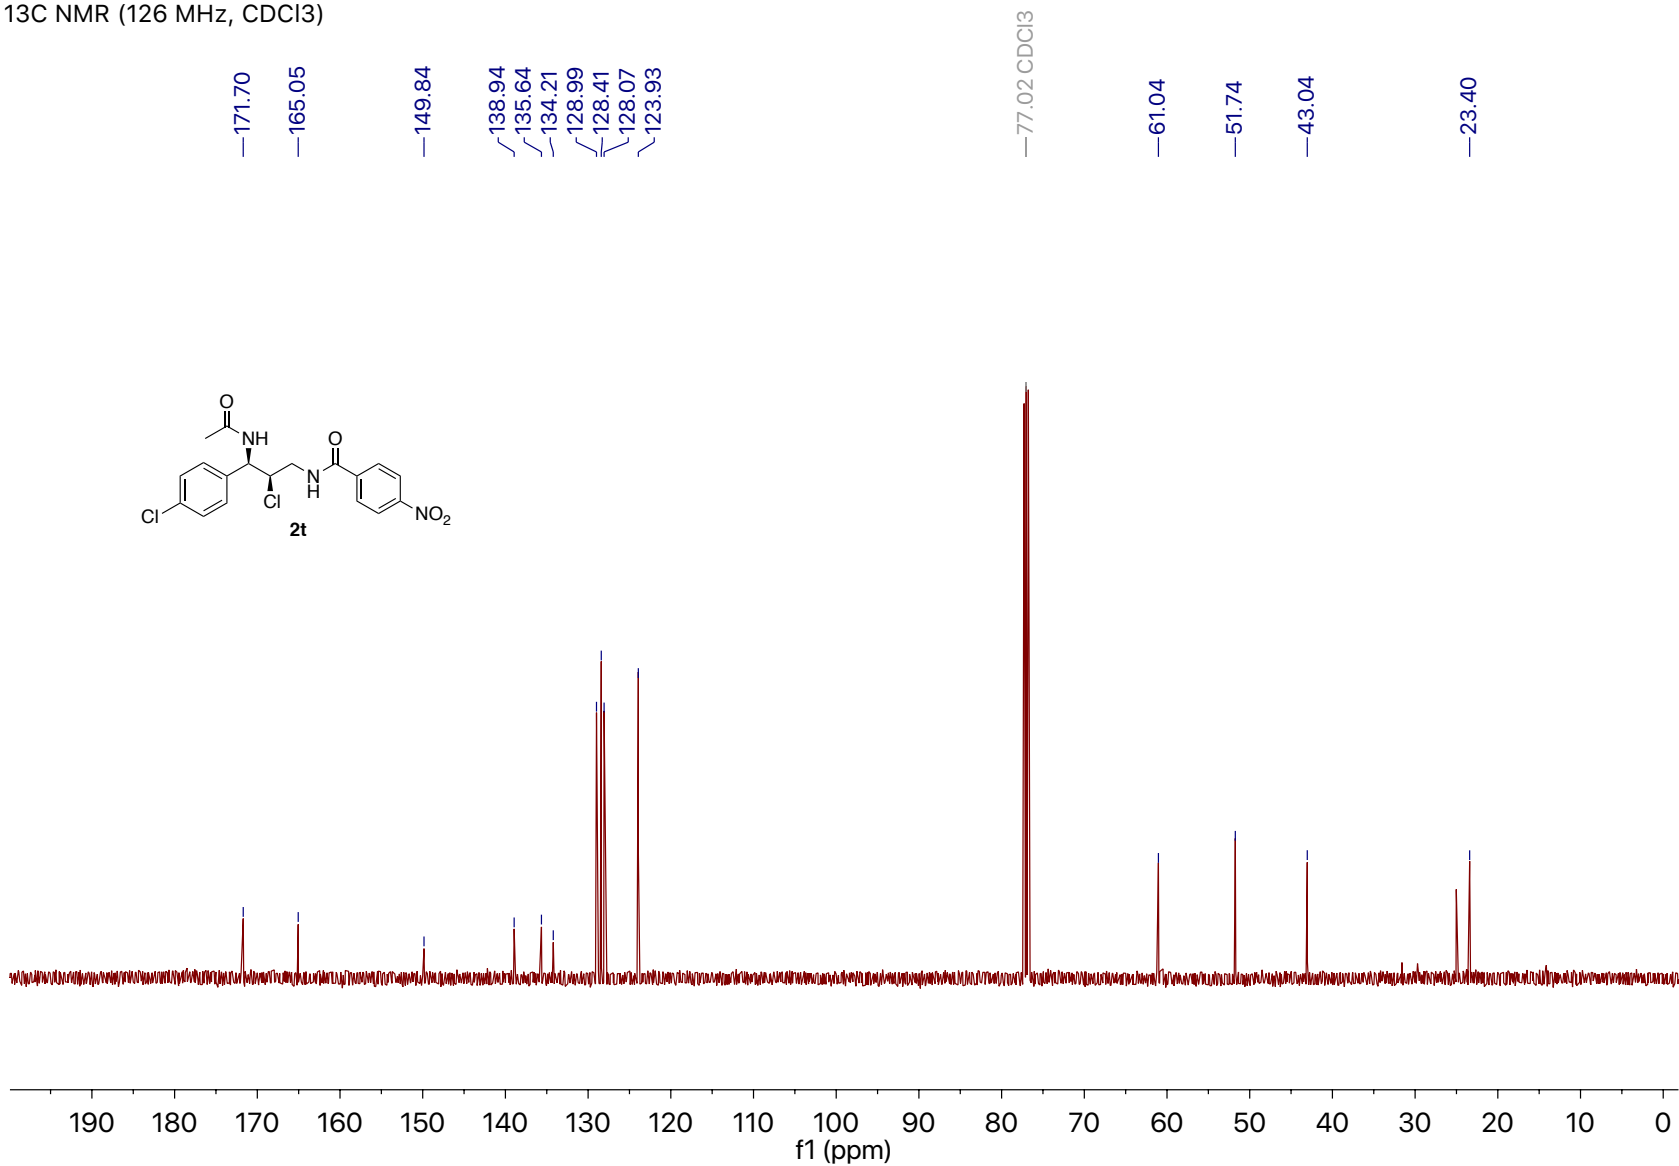

<sup>1</sup>H NMR (500 MHz, CDCl<sub>3</sub>)

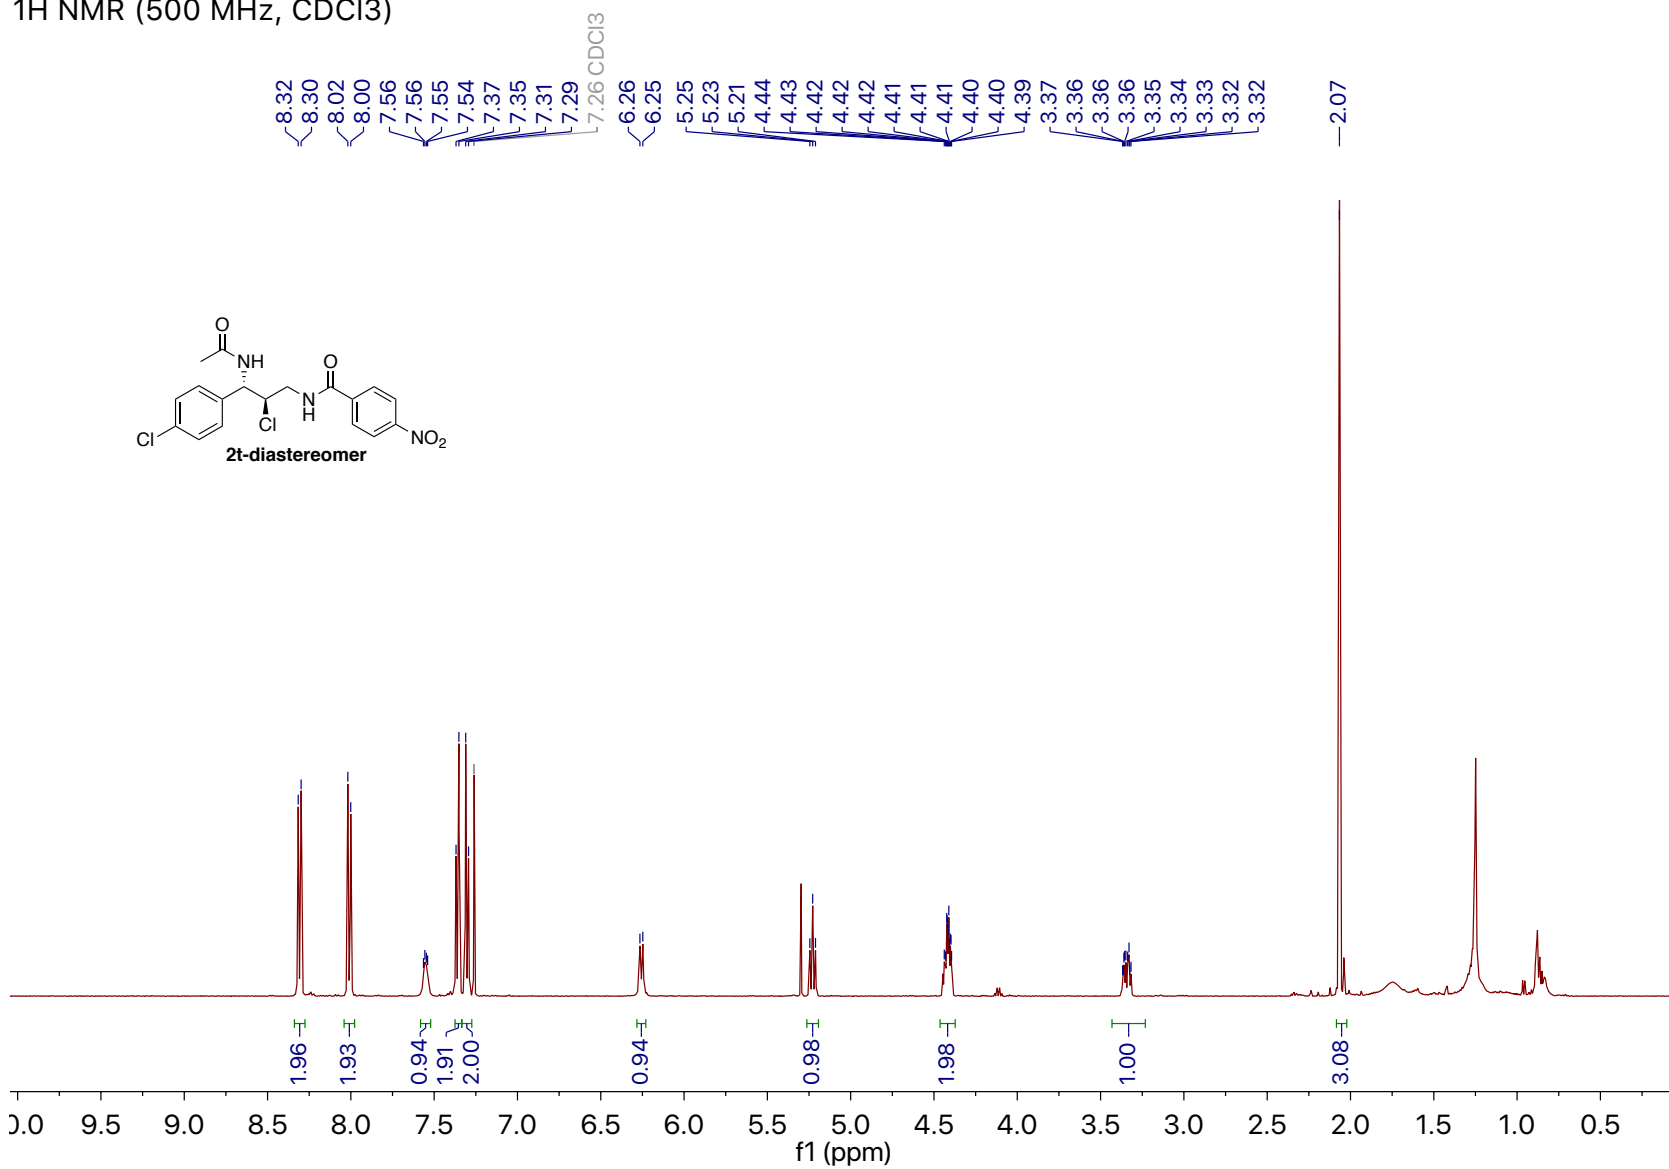

<sup>13</sup>C NMR (126 MHz, CDCl<sub>3</sub>)

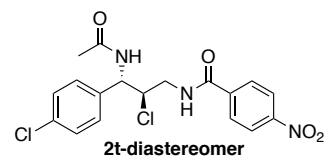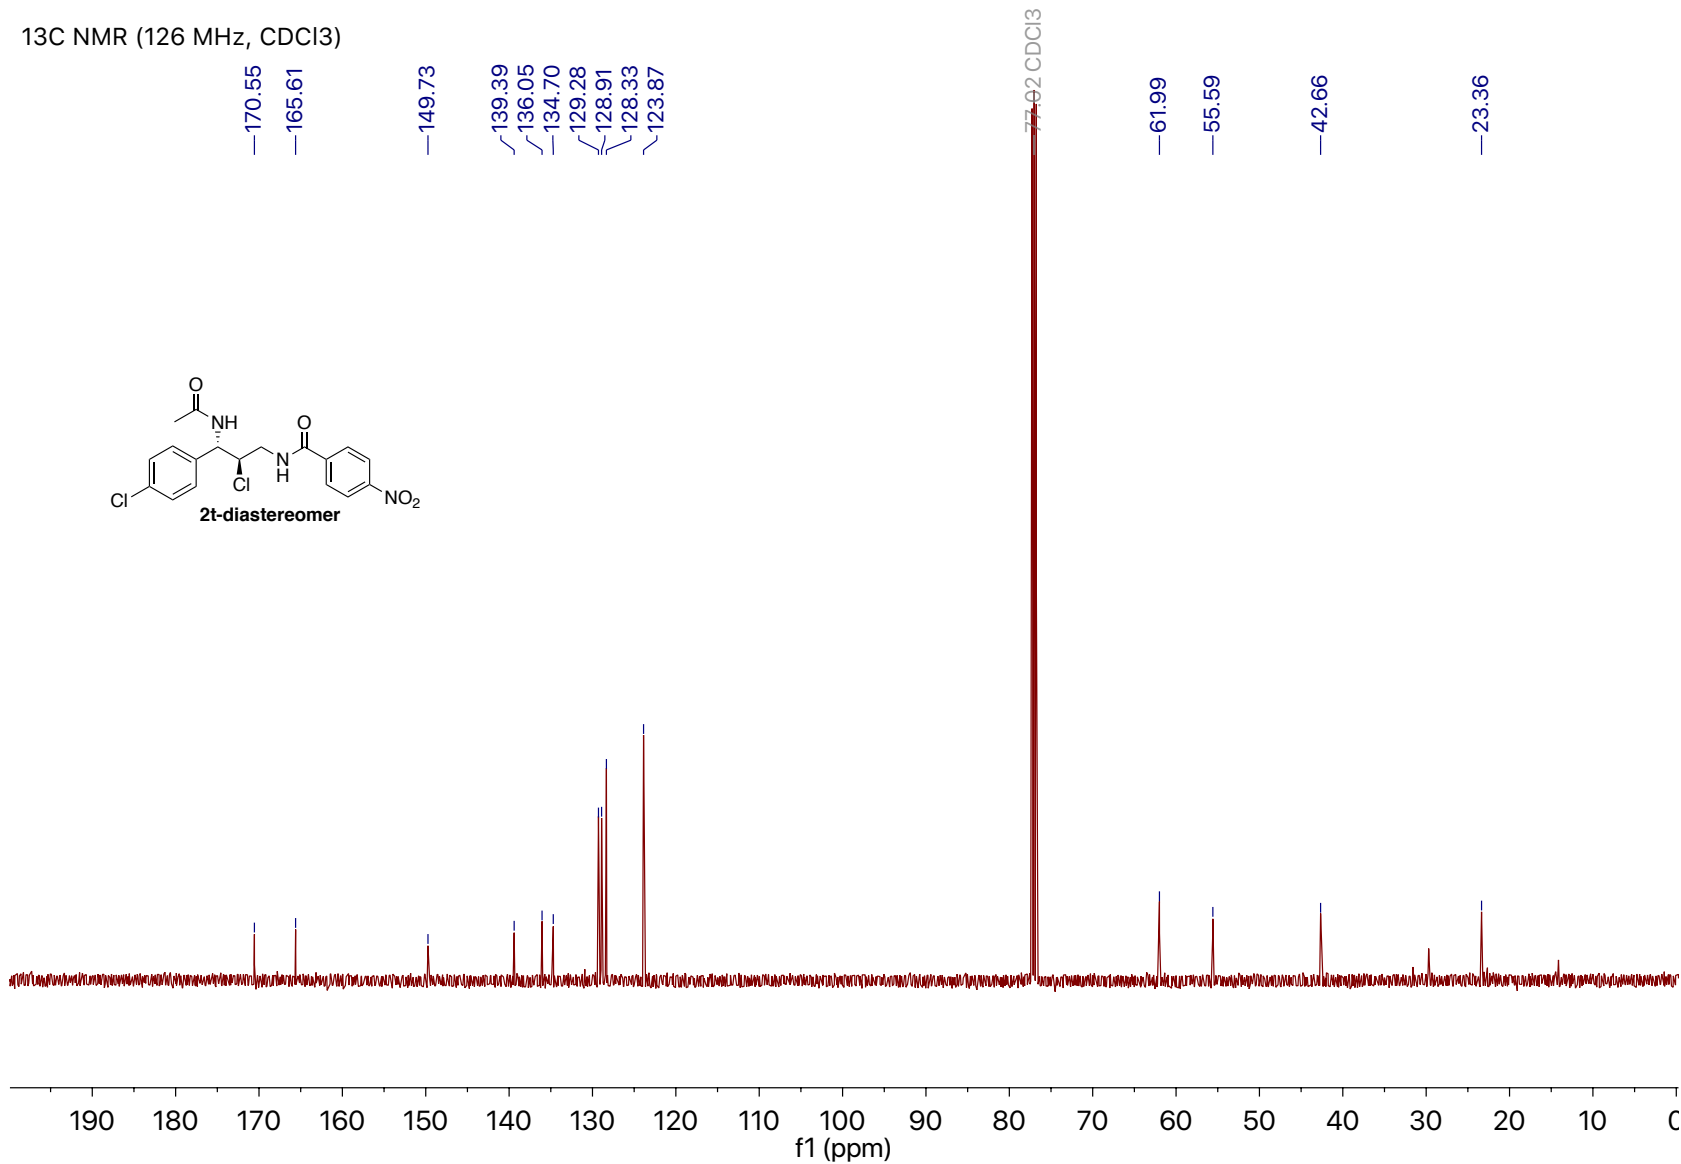

1H NMR (500 MHz, CDCl3)

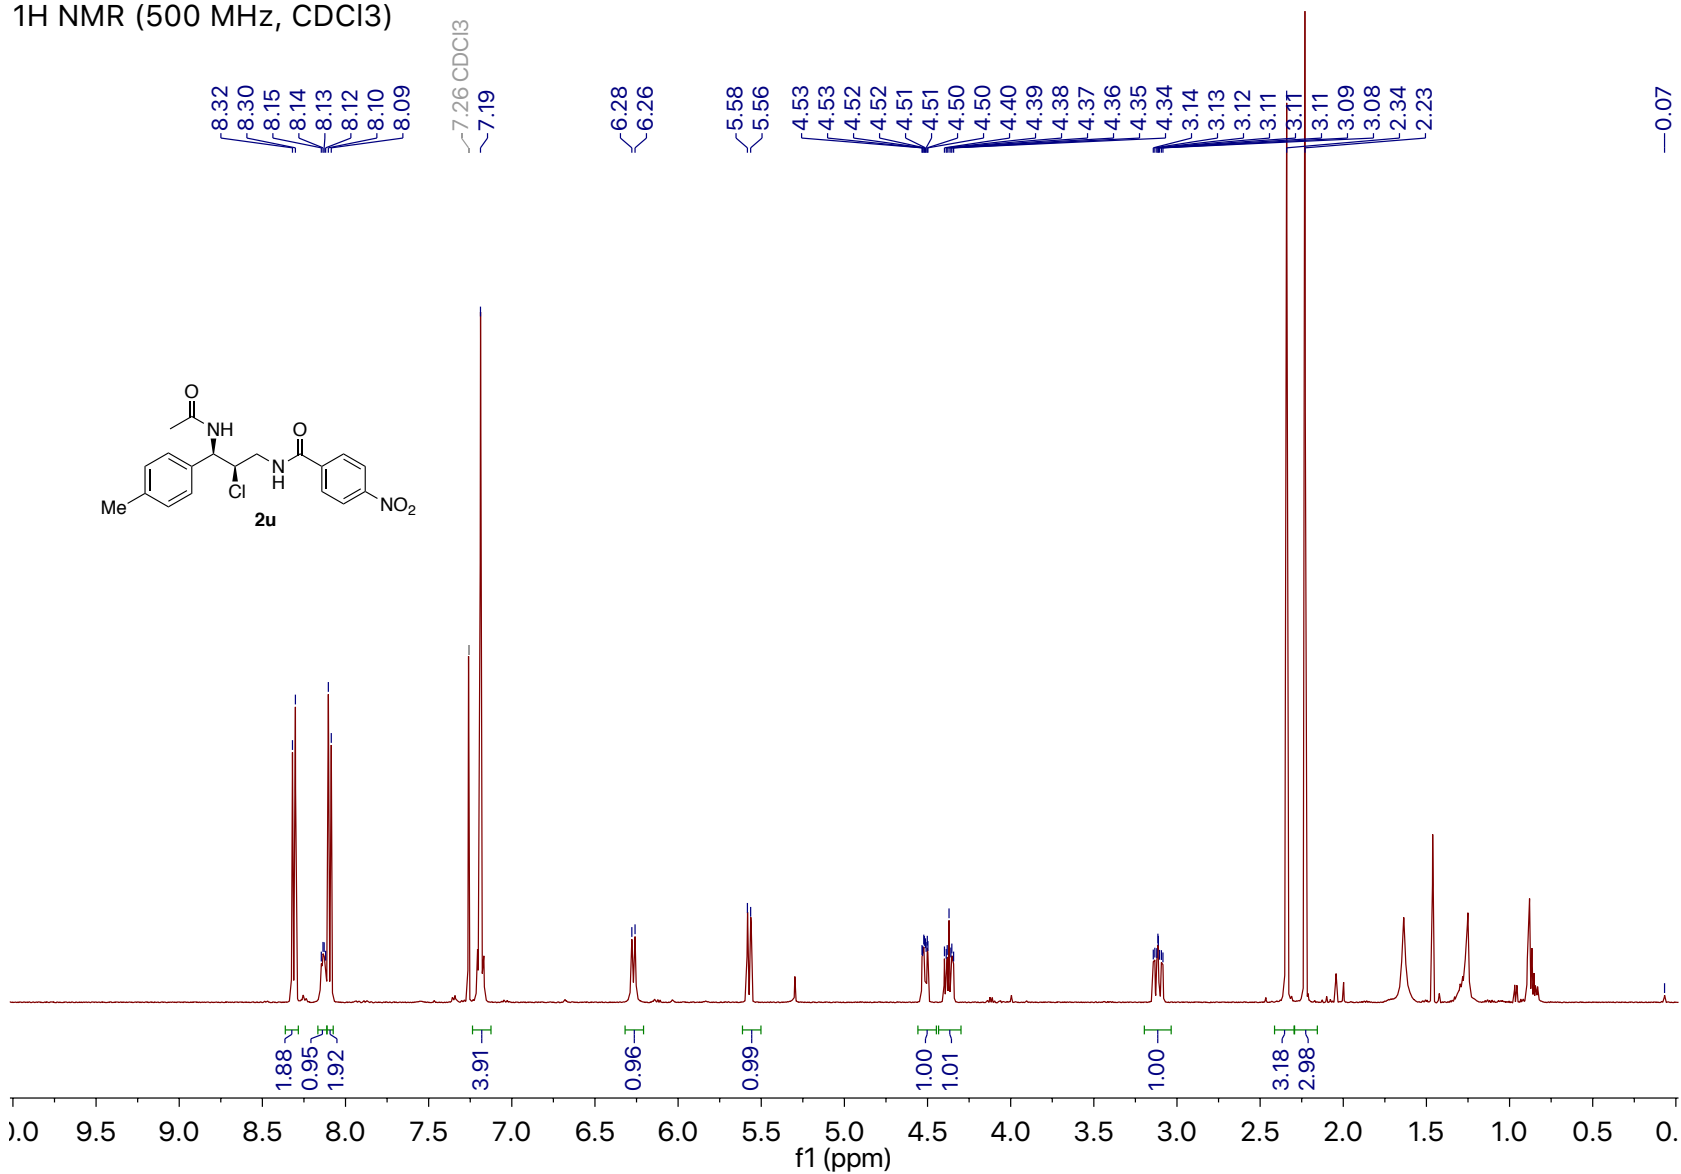

13C NMR (126 MHz, CDCl3)

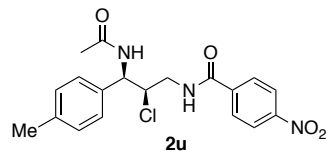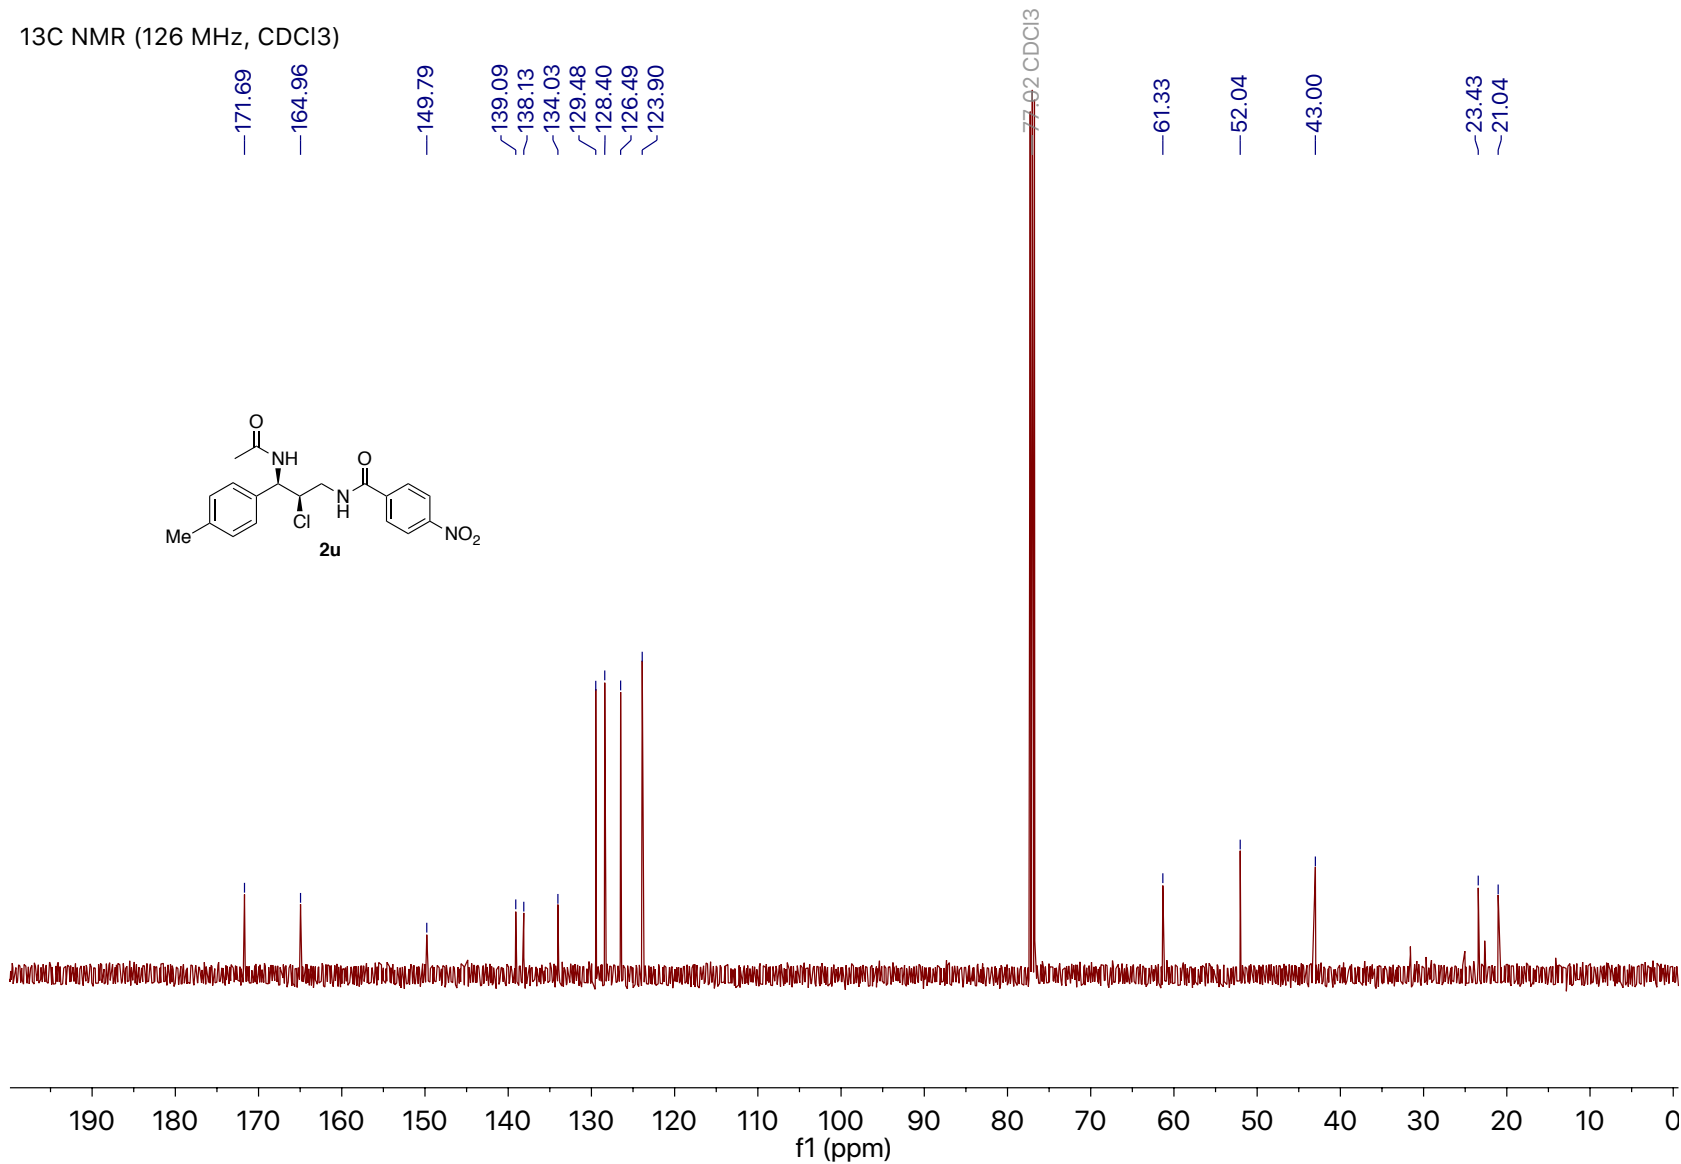

1H NMR (500 MHz, CDCl3)

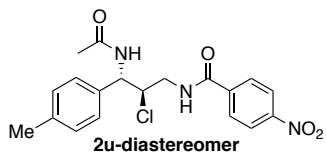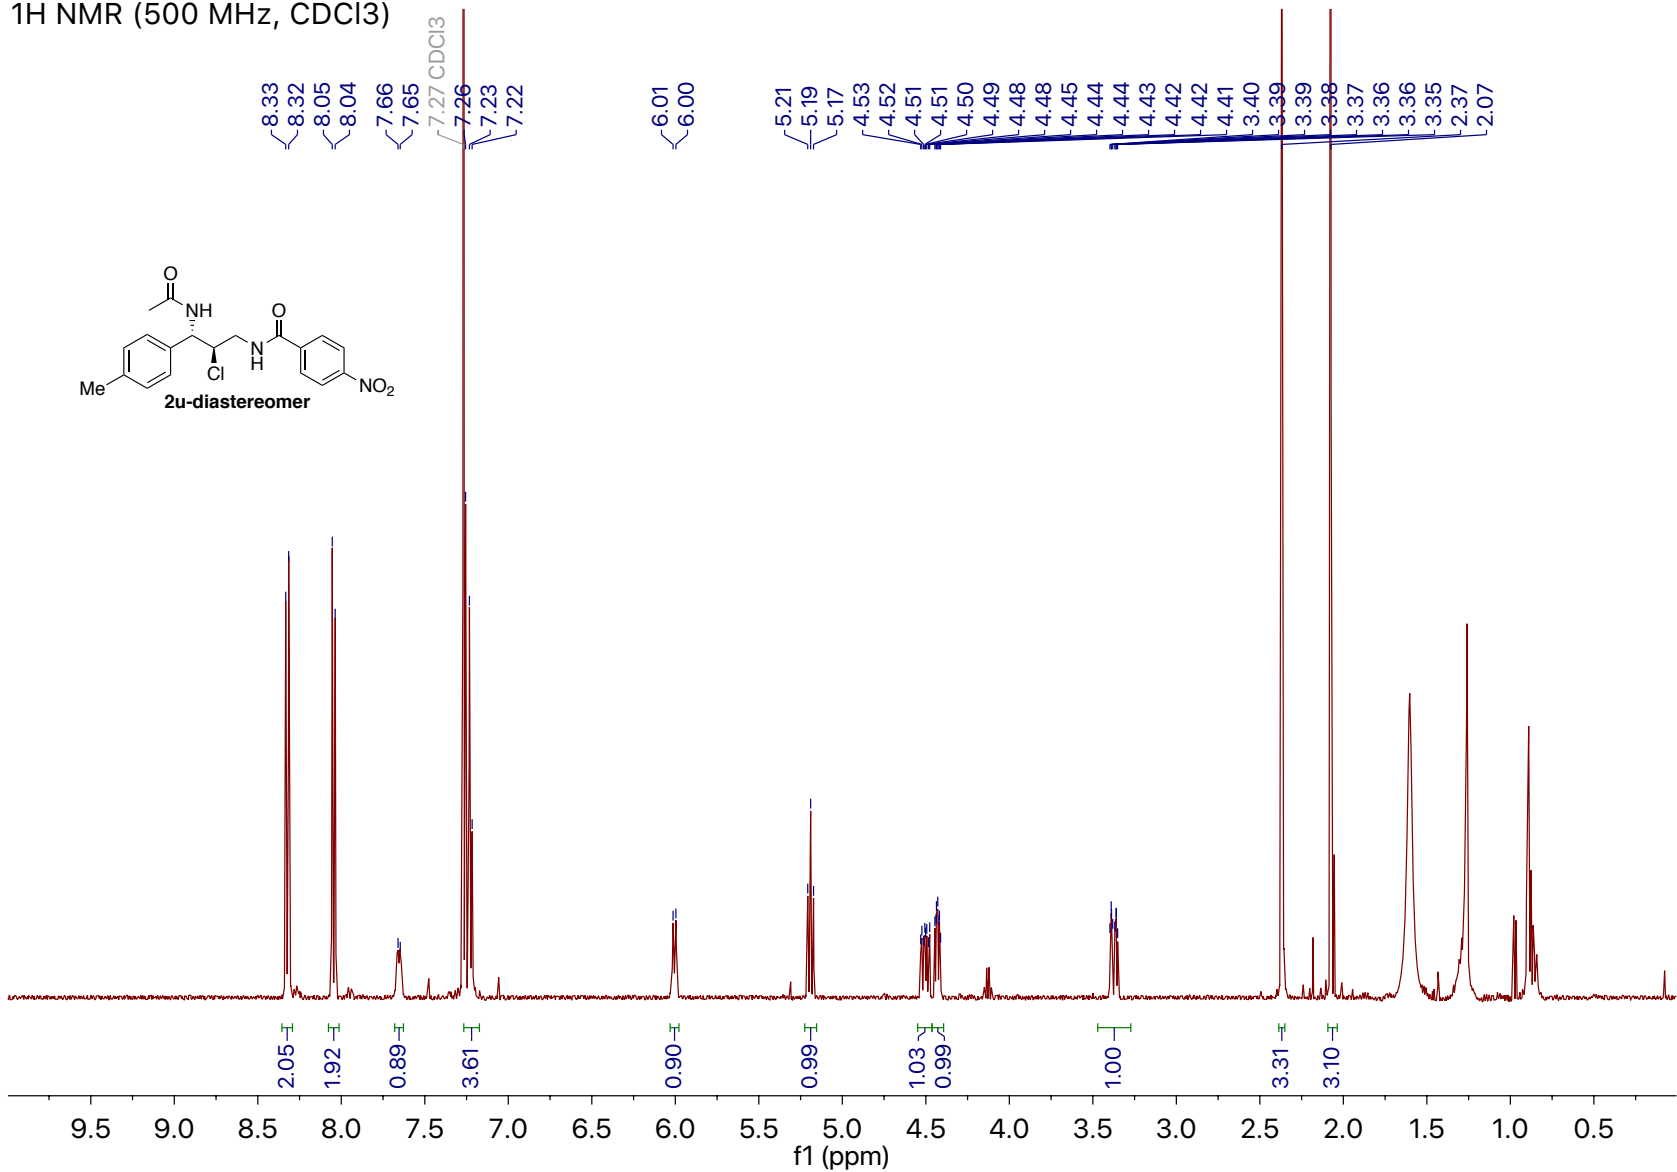

13C NMR (126 MHz, CDCl3)

—170.68

—165.48

—149.66

—139.60

—138.82

—134.64

—129.84

—128.36

—127.31

—123.81

—77.01 CDCl3

—62.15

—56.06

—42.47

—23.41

—21.15

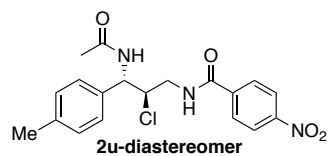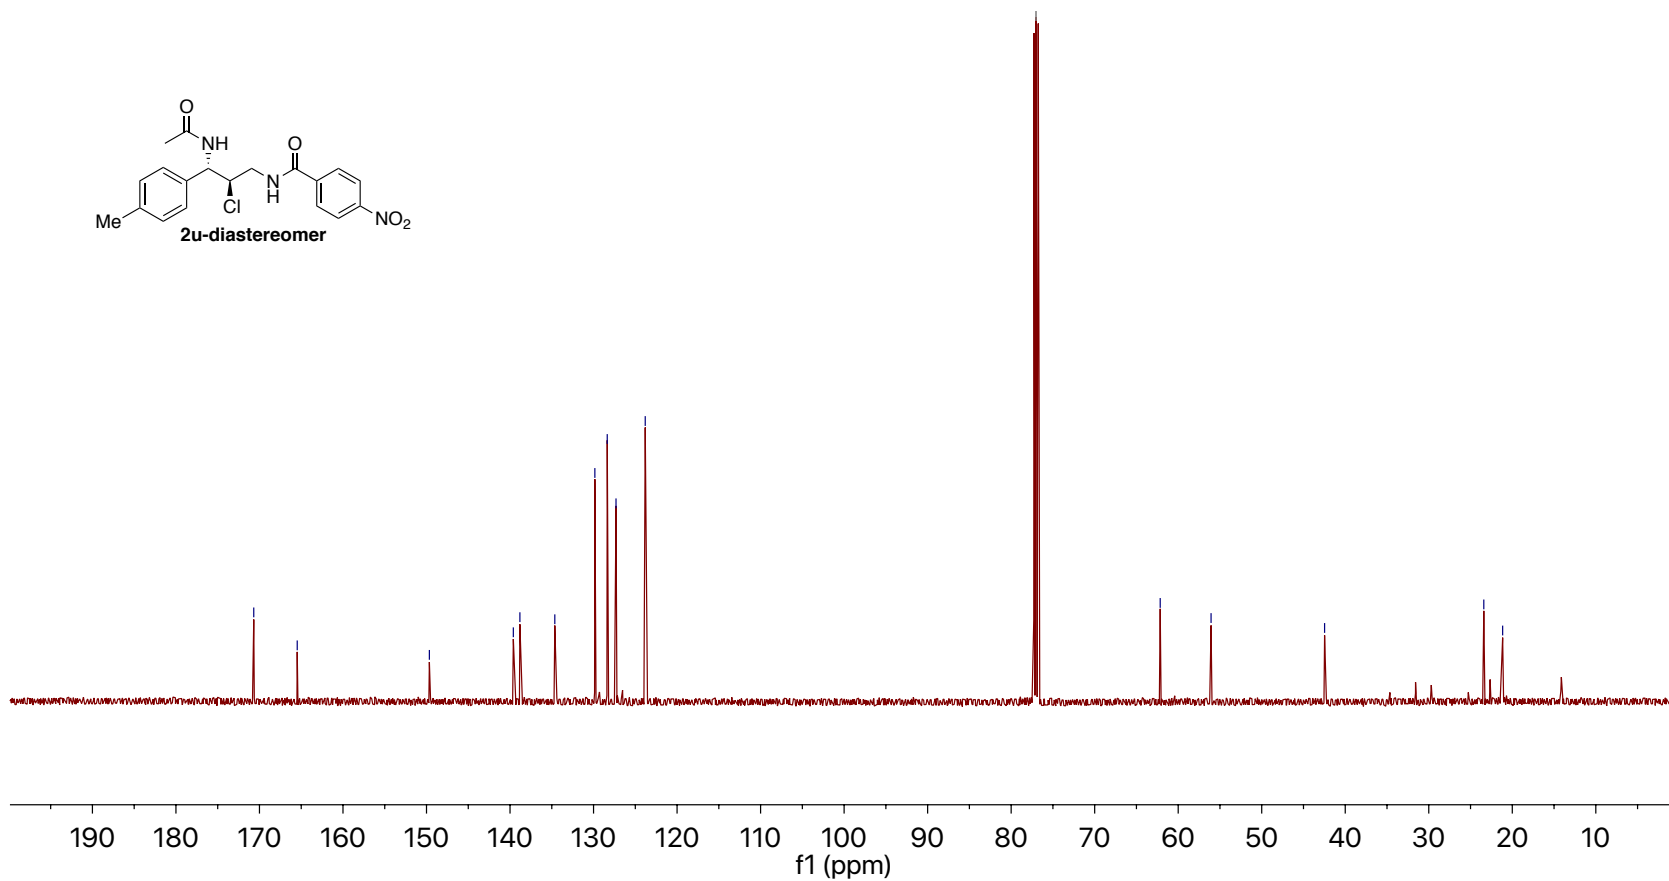

1H NMR (500 MHz, CDCl3)

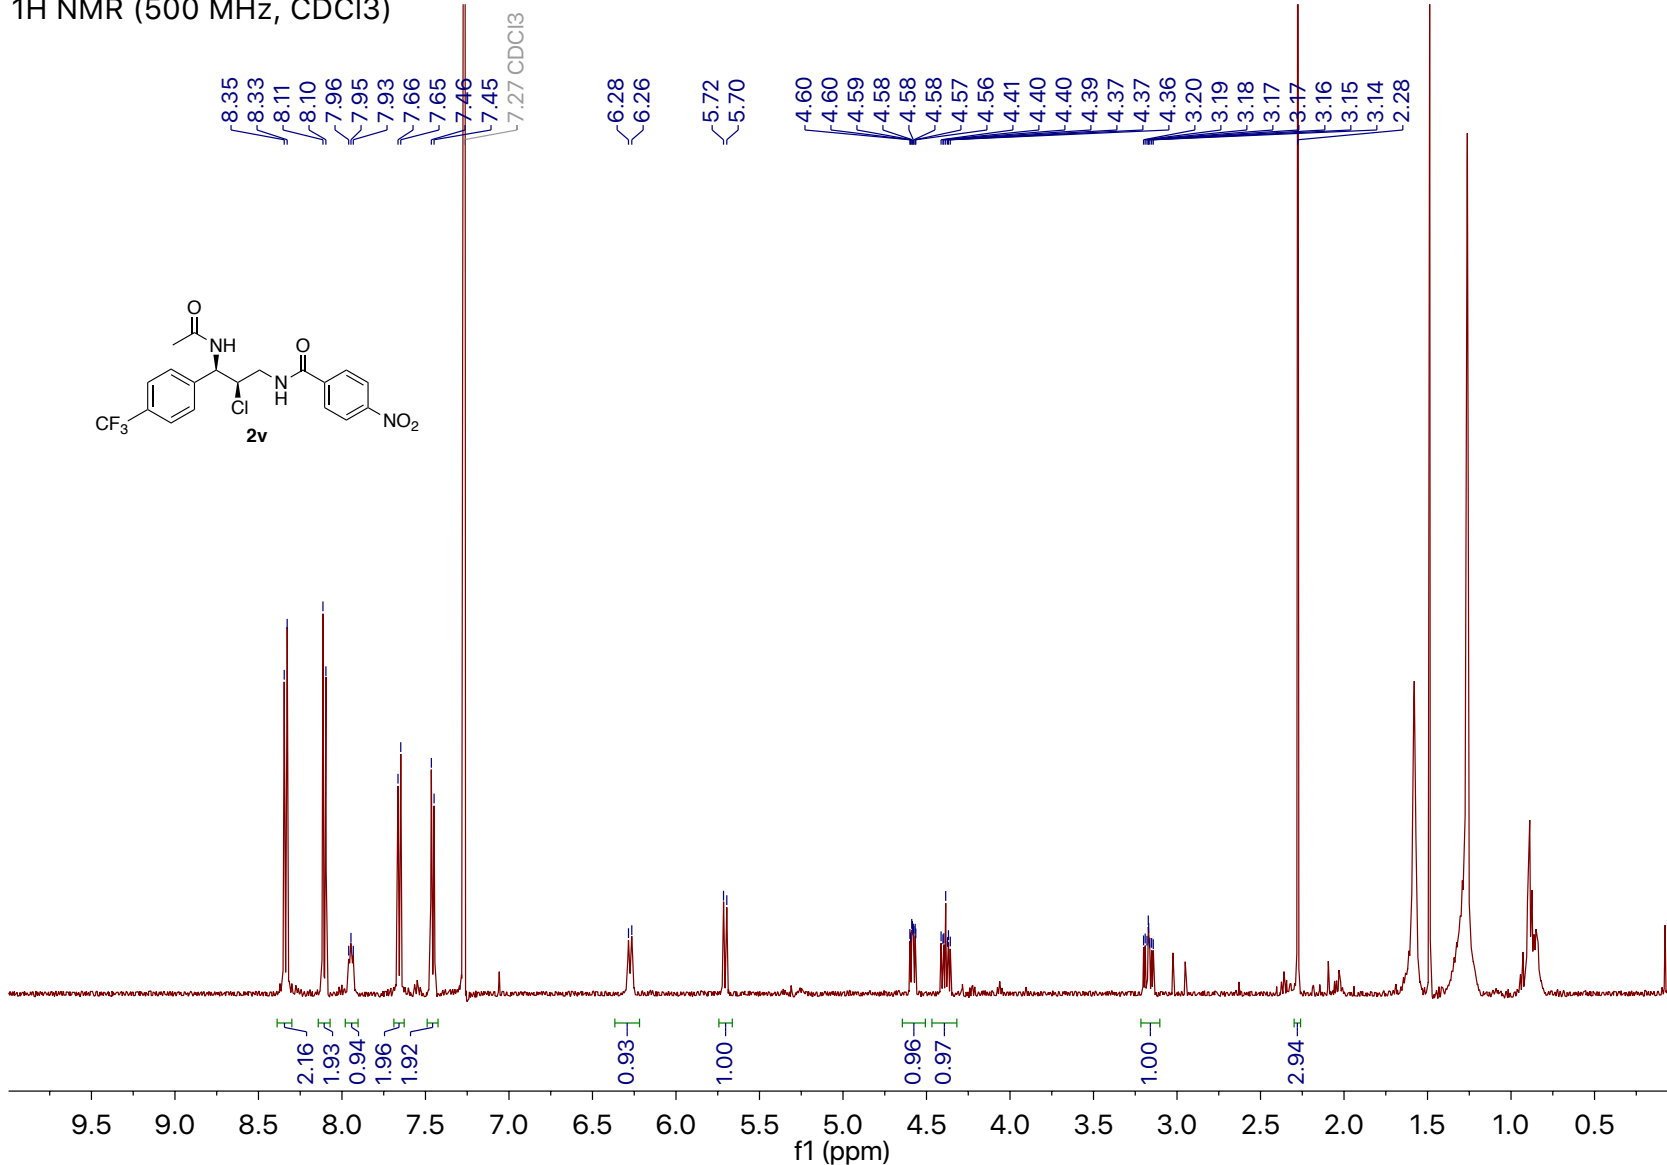



<sup>13</sup>C NMR (126 MHz, CDCl<sub>3</sub>)

—171.71  
—165.06  
—149.89  
—141.11  
—138.87  
—128.41  
—127.14  
—125.82  
—125.79  
—123.96  
77.02-CDCl<sub>3</sub>  
—60.81  
—51.96  
—43.04  
—23.42

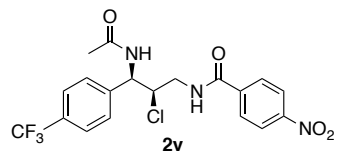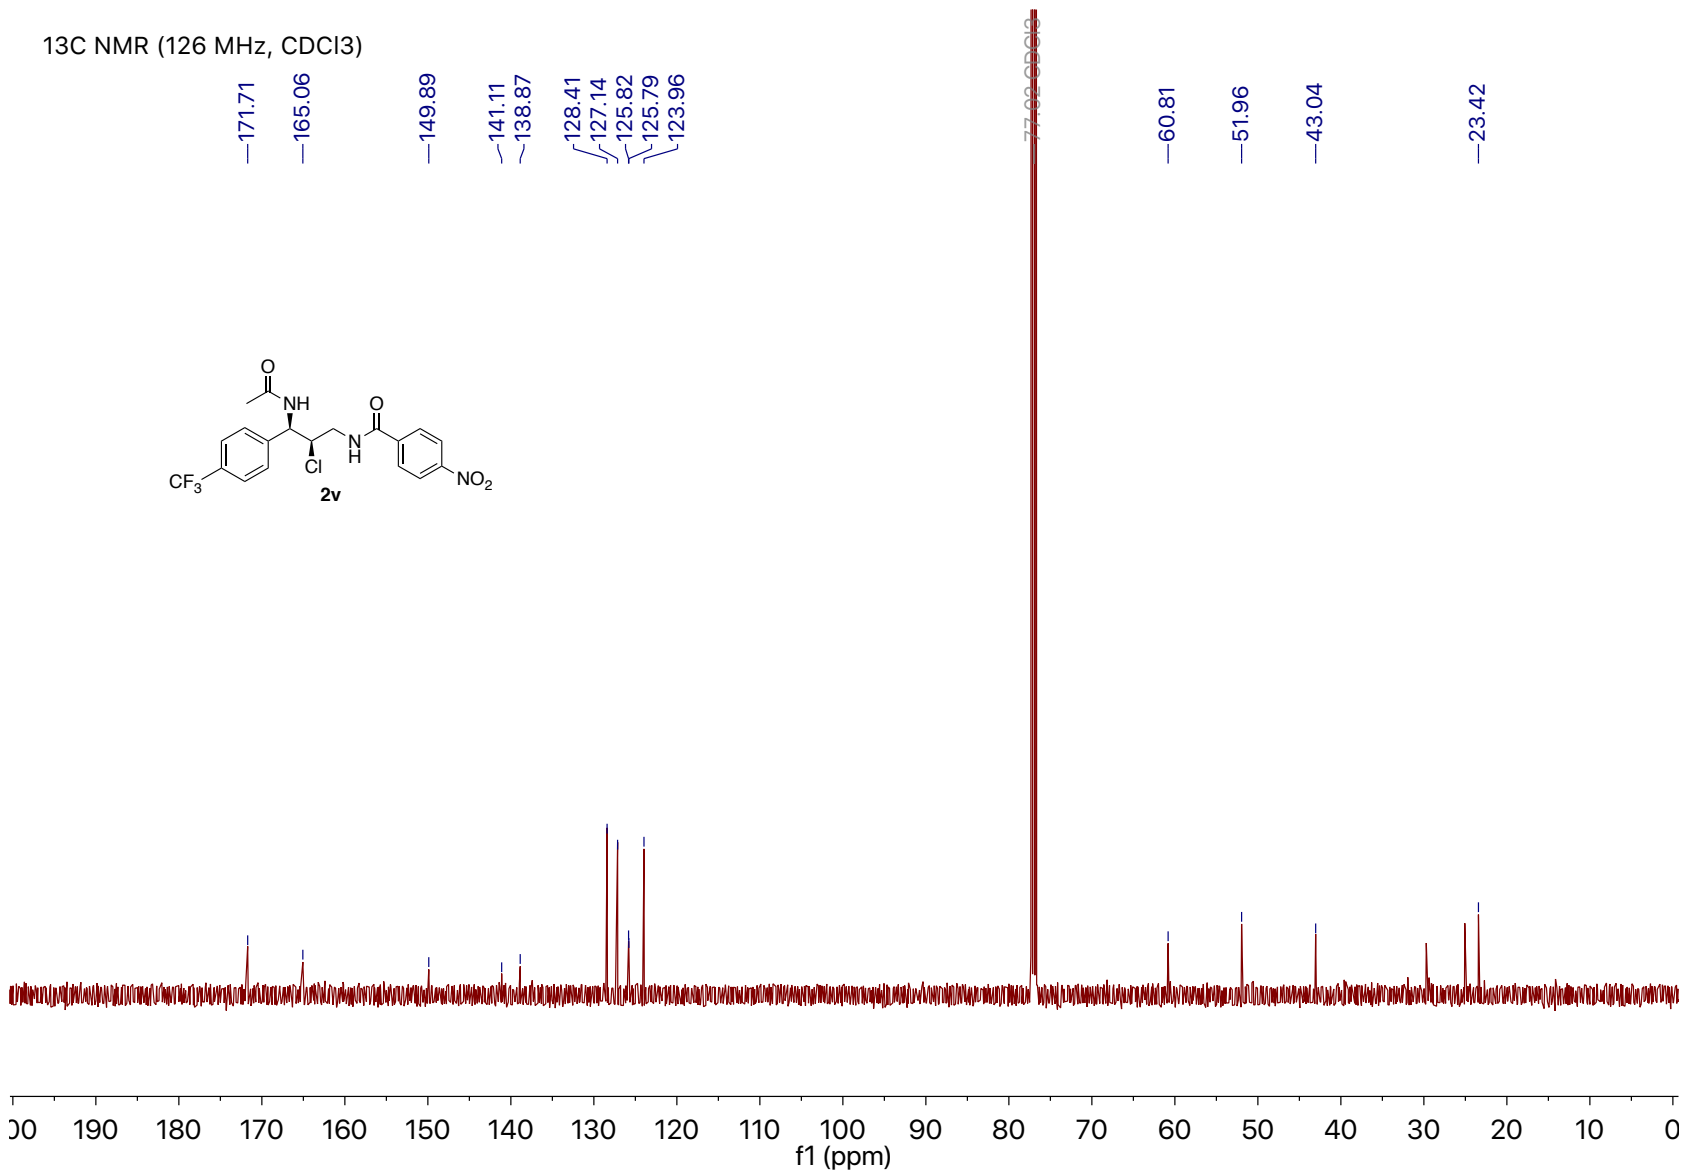

19F NMR (470 MHz, CDCl3)

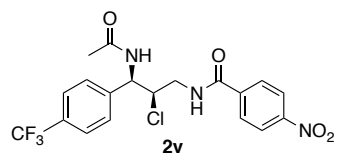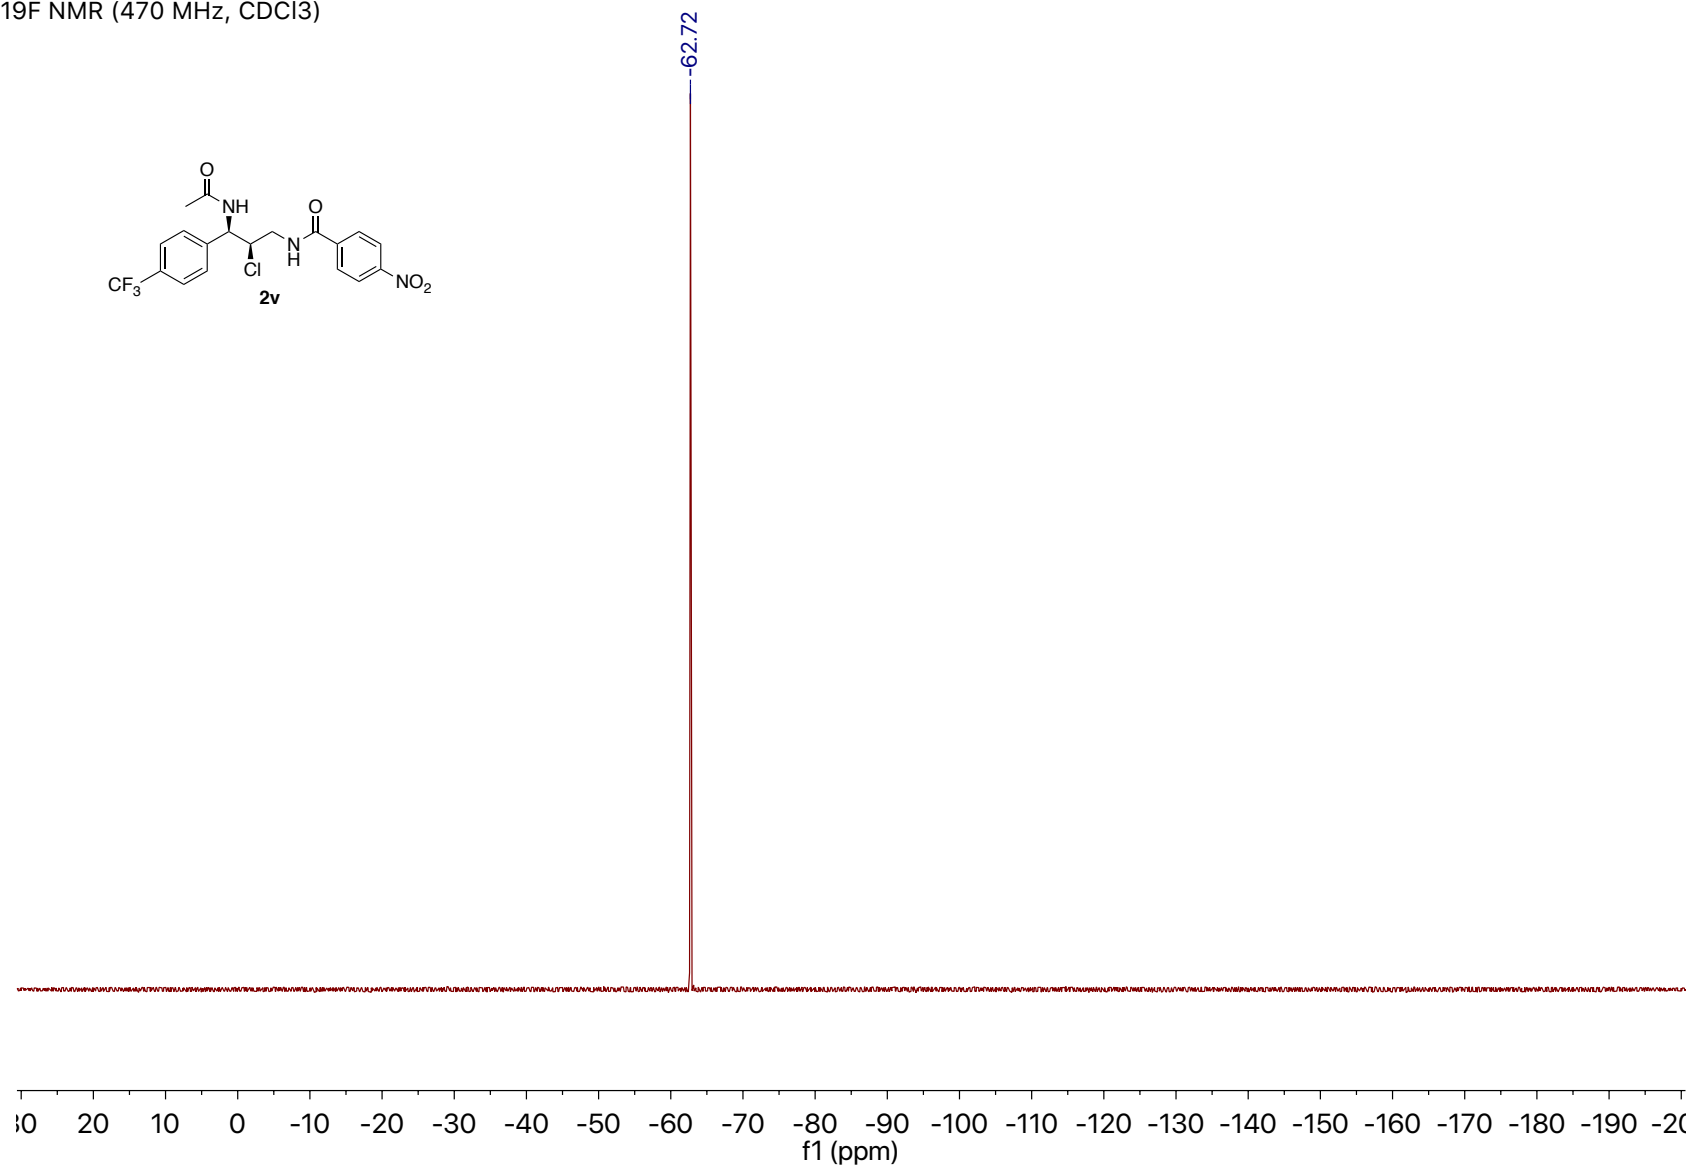

1H NMR (500 MHz, CDCl3)

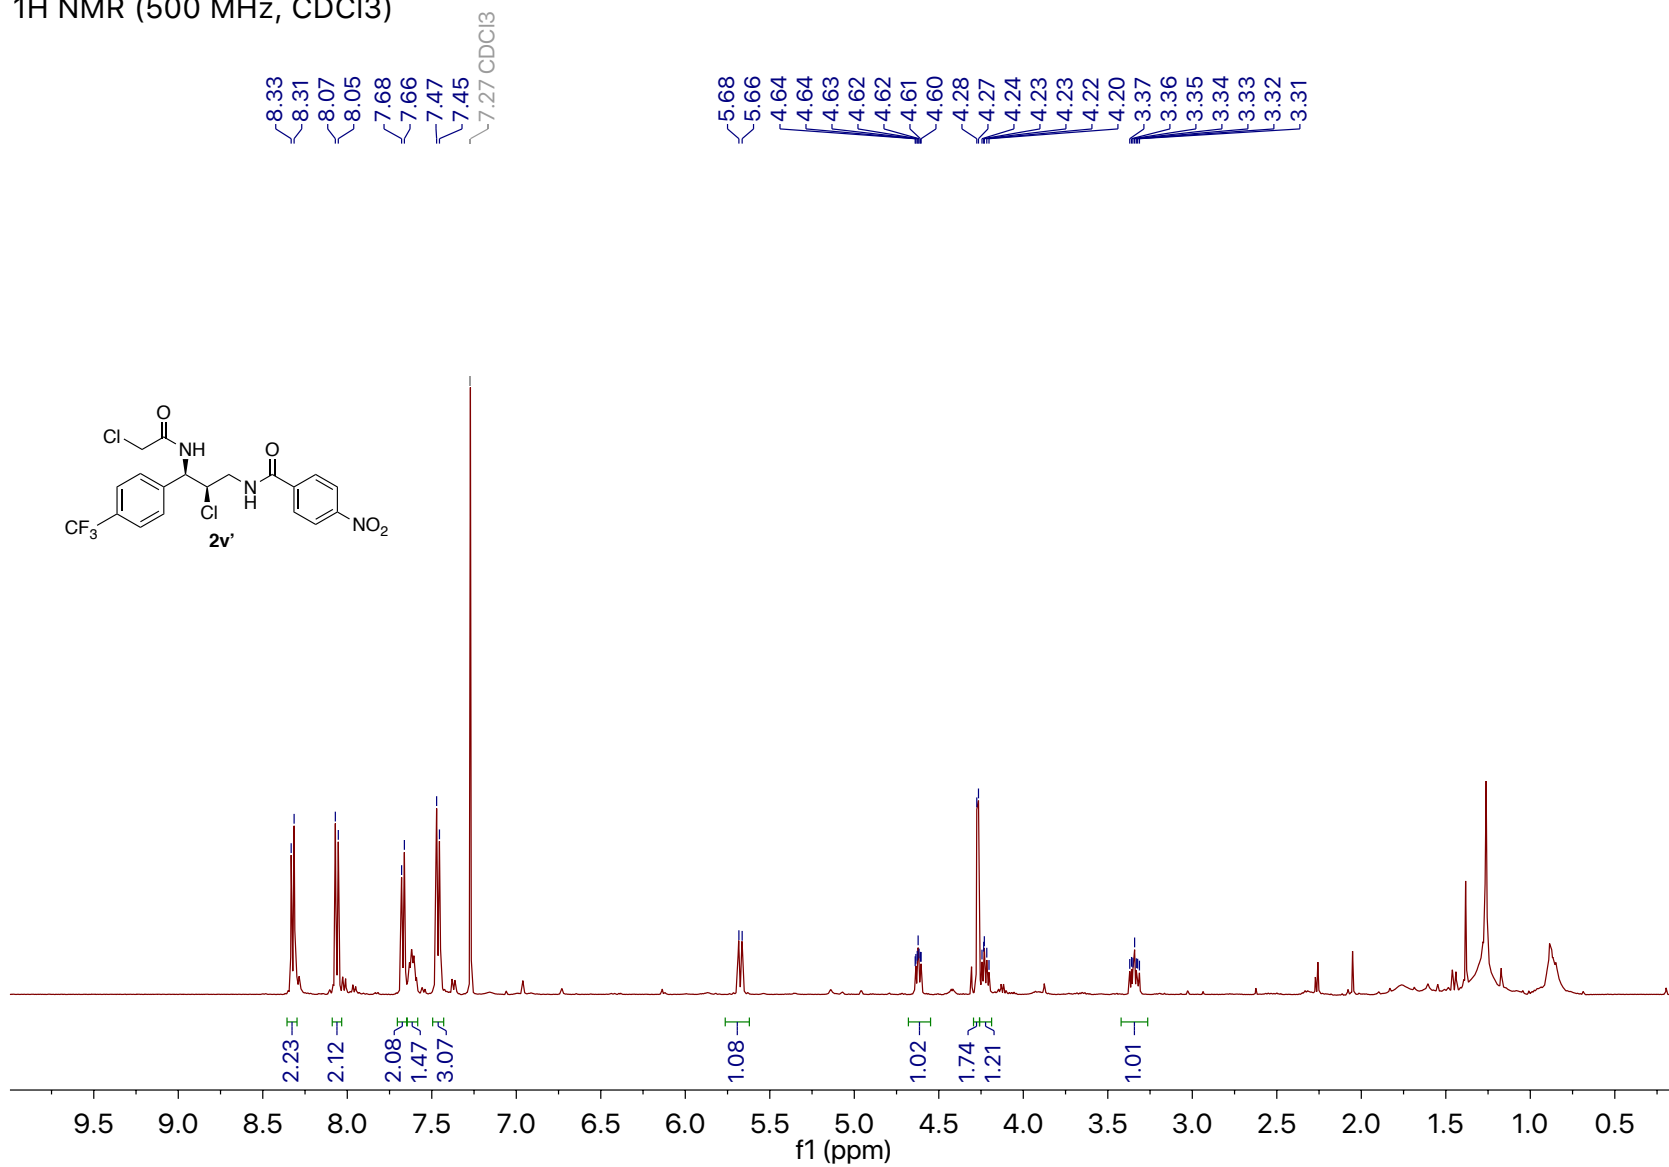

13C NMR (126 MHz, CDCl3)

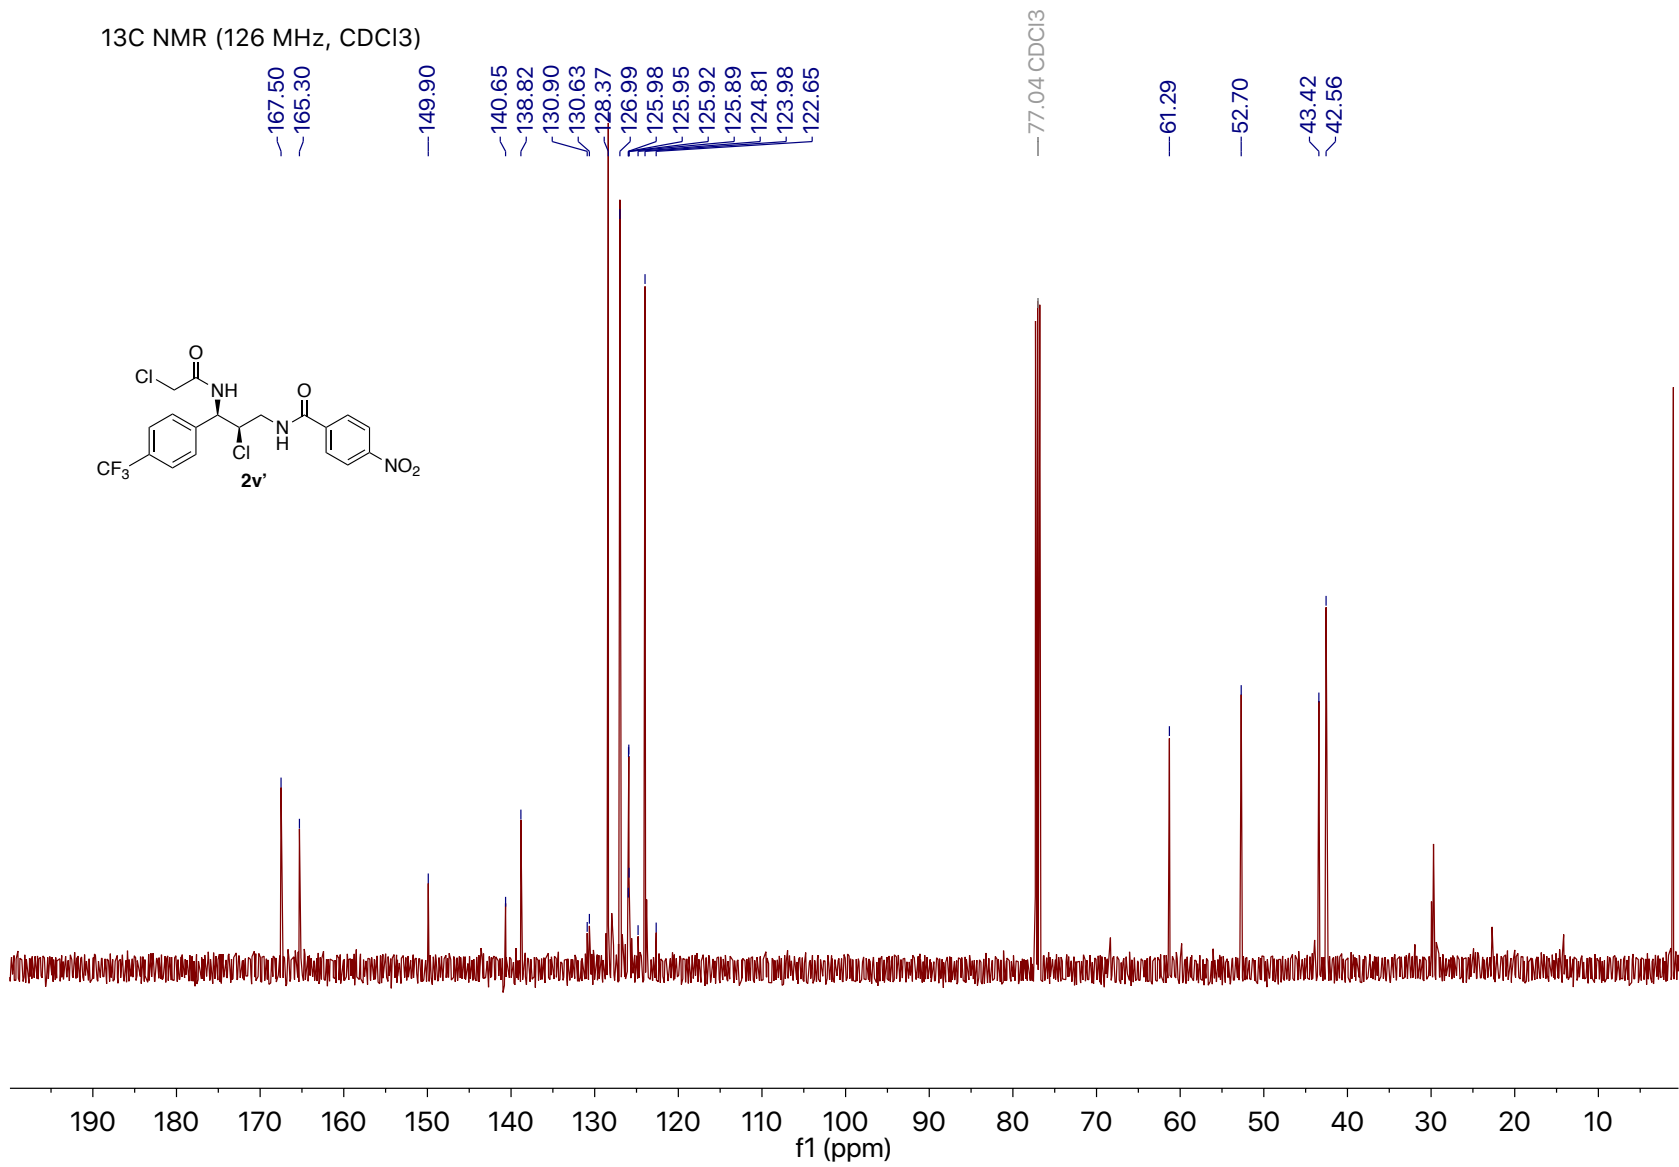

19F NMR (470 MHz, CDCl3)

---62.75

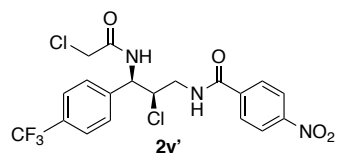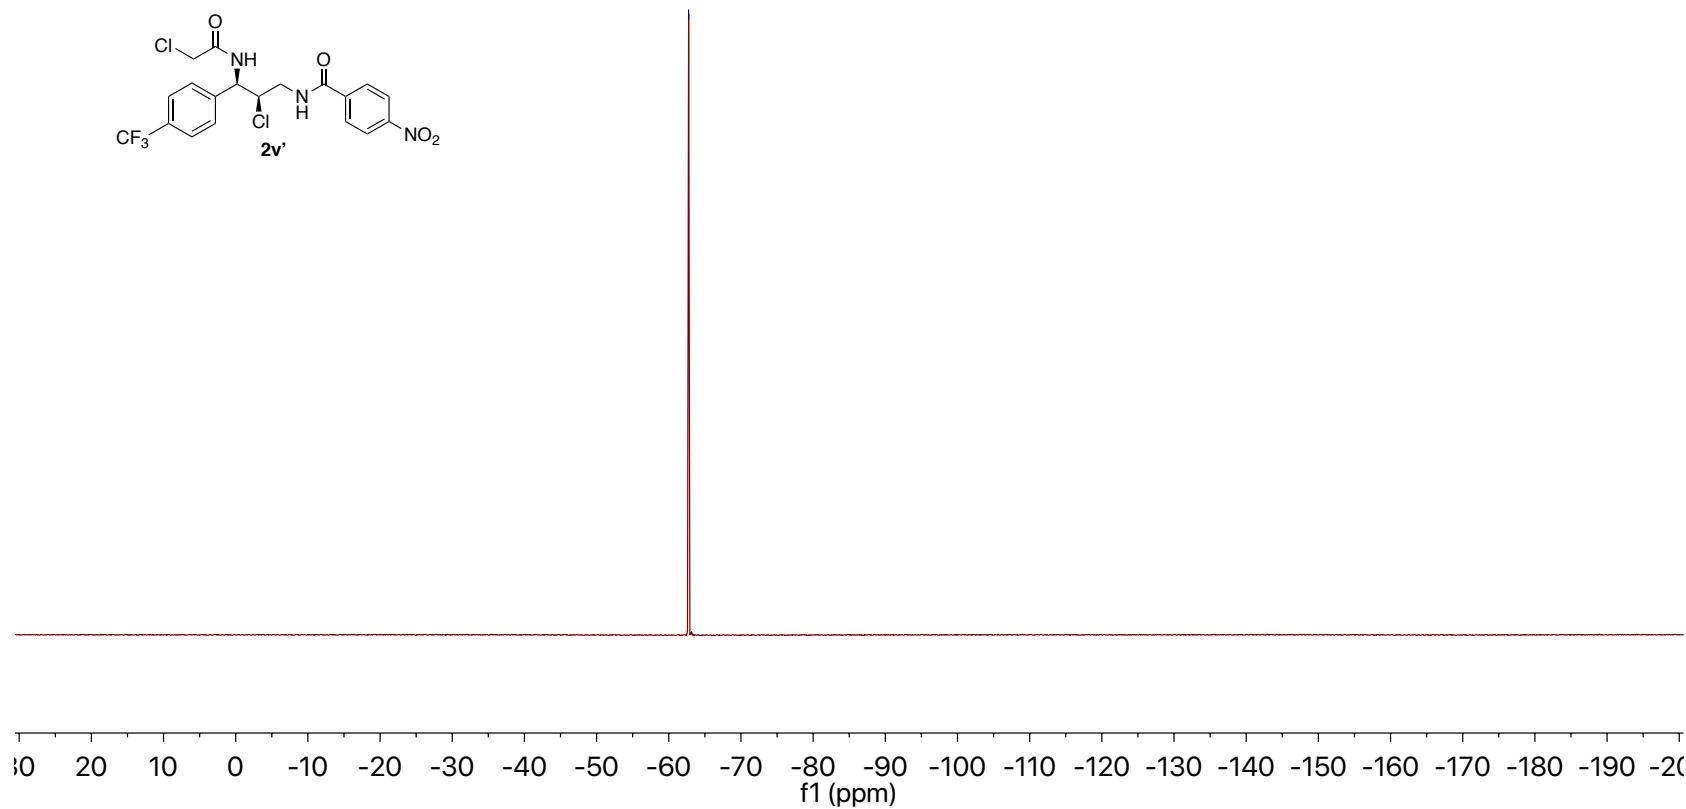

1H NMR (500 MHz, CDCl3)

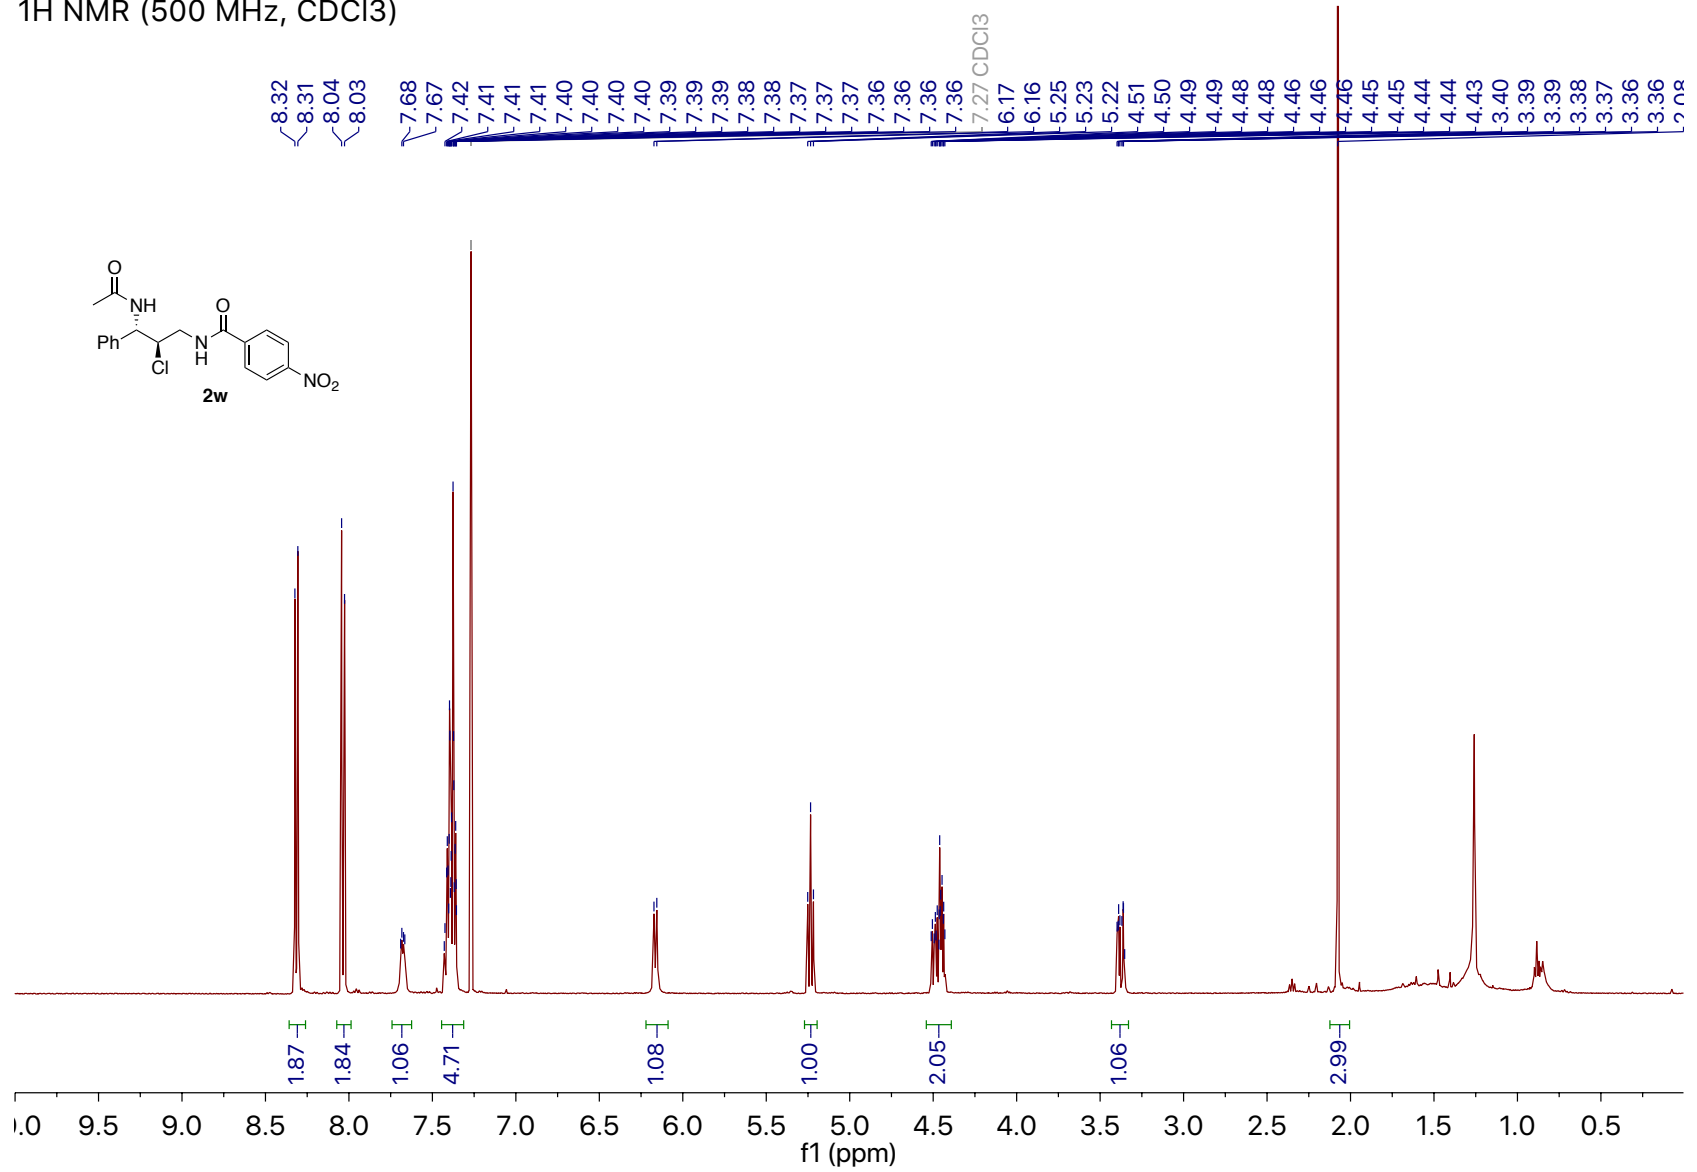

<sup>13</sup>C NMR (126 MHz, CDCl<sub>3</sub>)

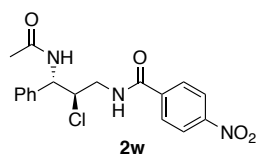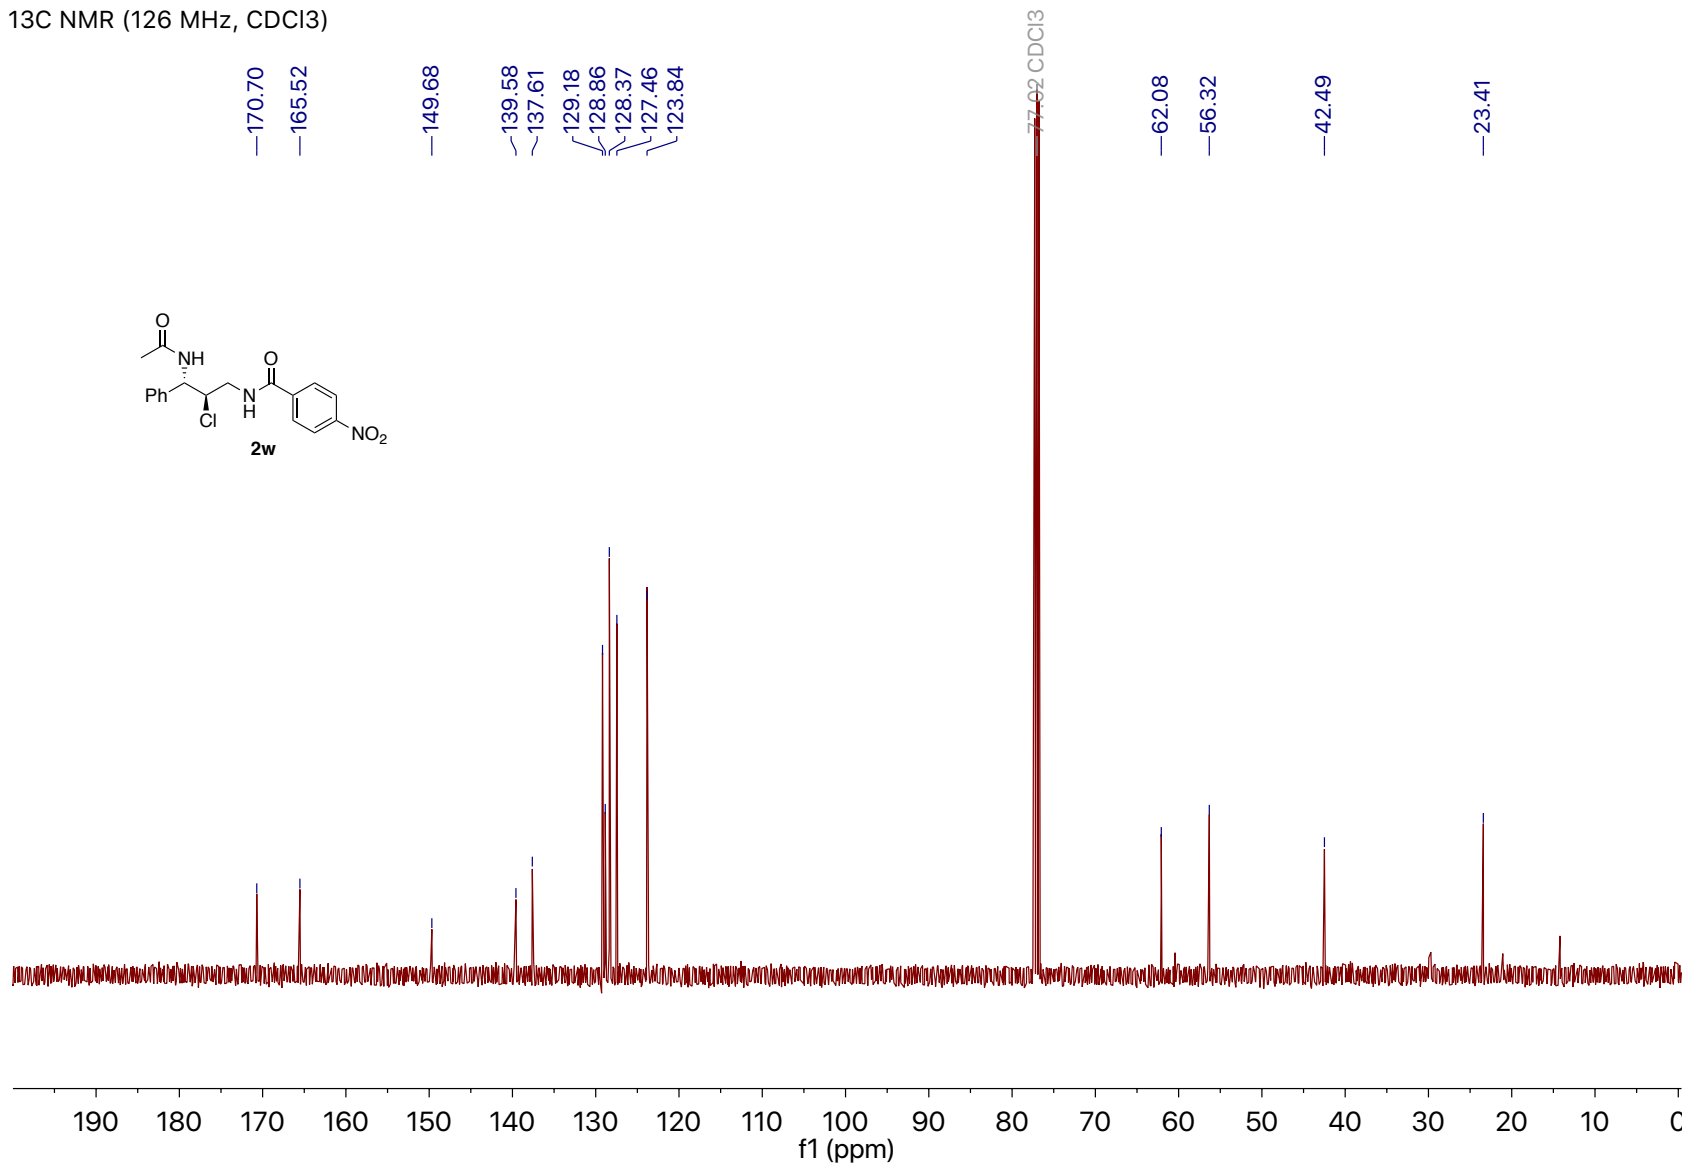

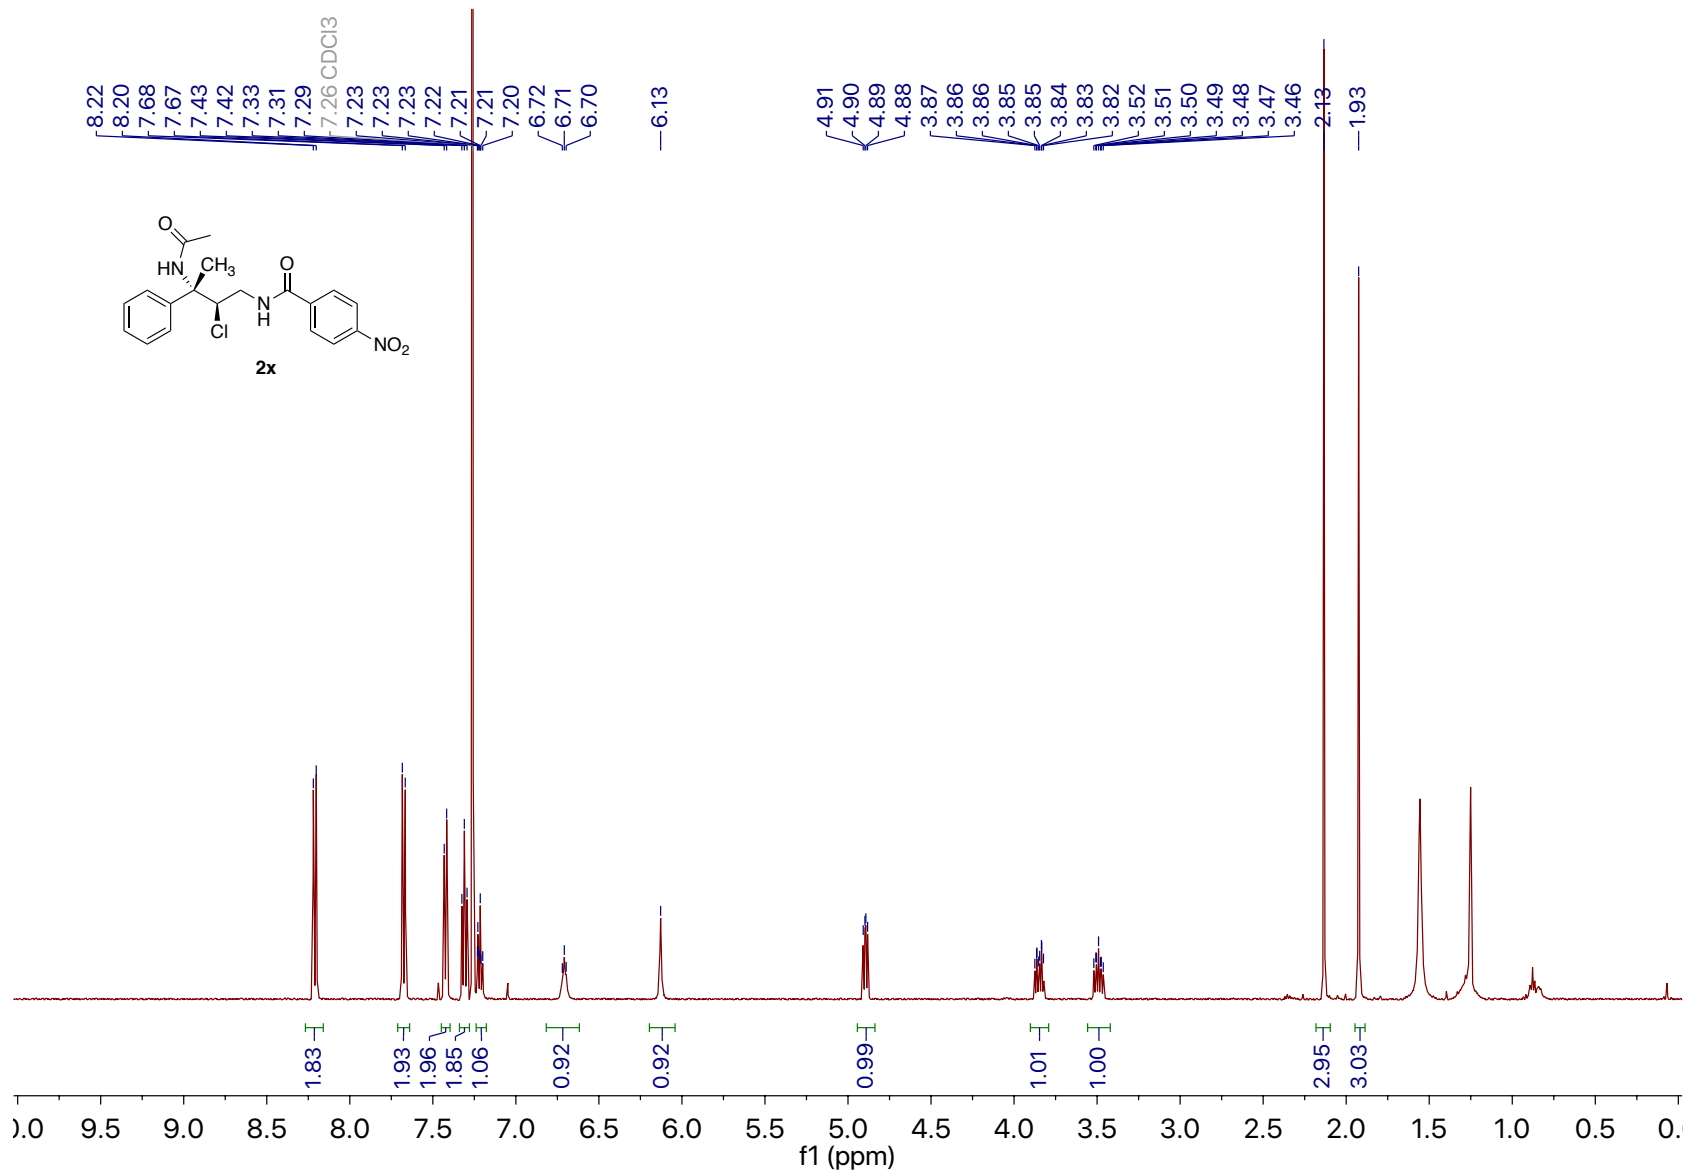



<sup>13</sup>C NMR (126 MHz, CDCl<sub>3</sub>)

— 170.14  
— 165.26  
— 140.52  
— 139.17  
— 128.56  
— 128.06  
— 127.73  
— 125.91  
— 123.68  
77.01 CDCl<sub>3</sub>  
— 67.43  
— 61.58  
— 43.53  
— 29.70  
— 24.45

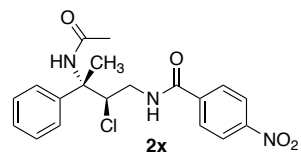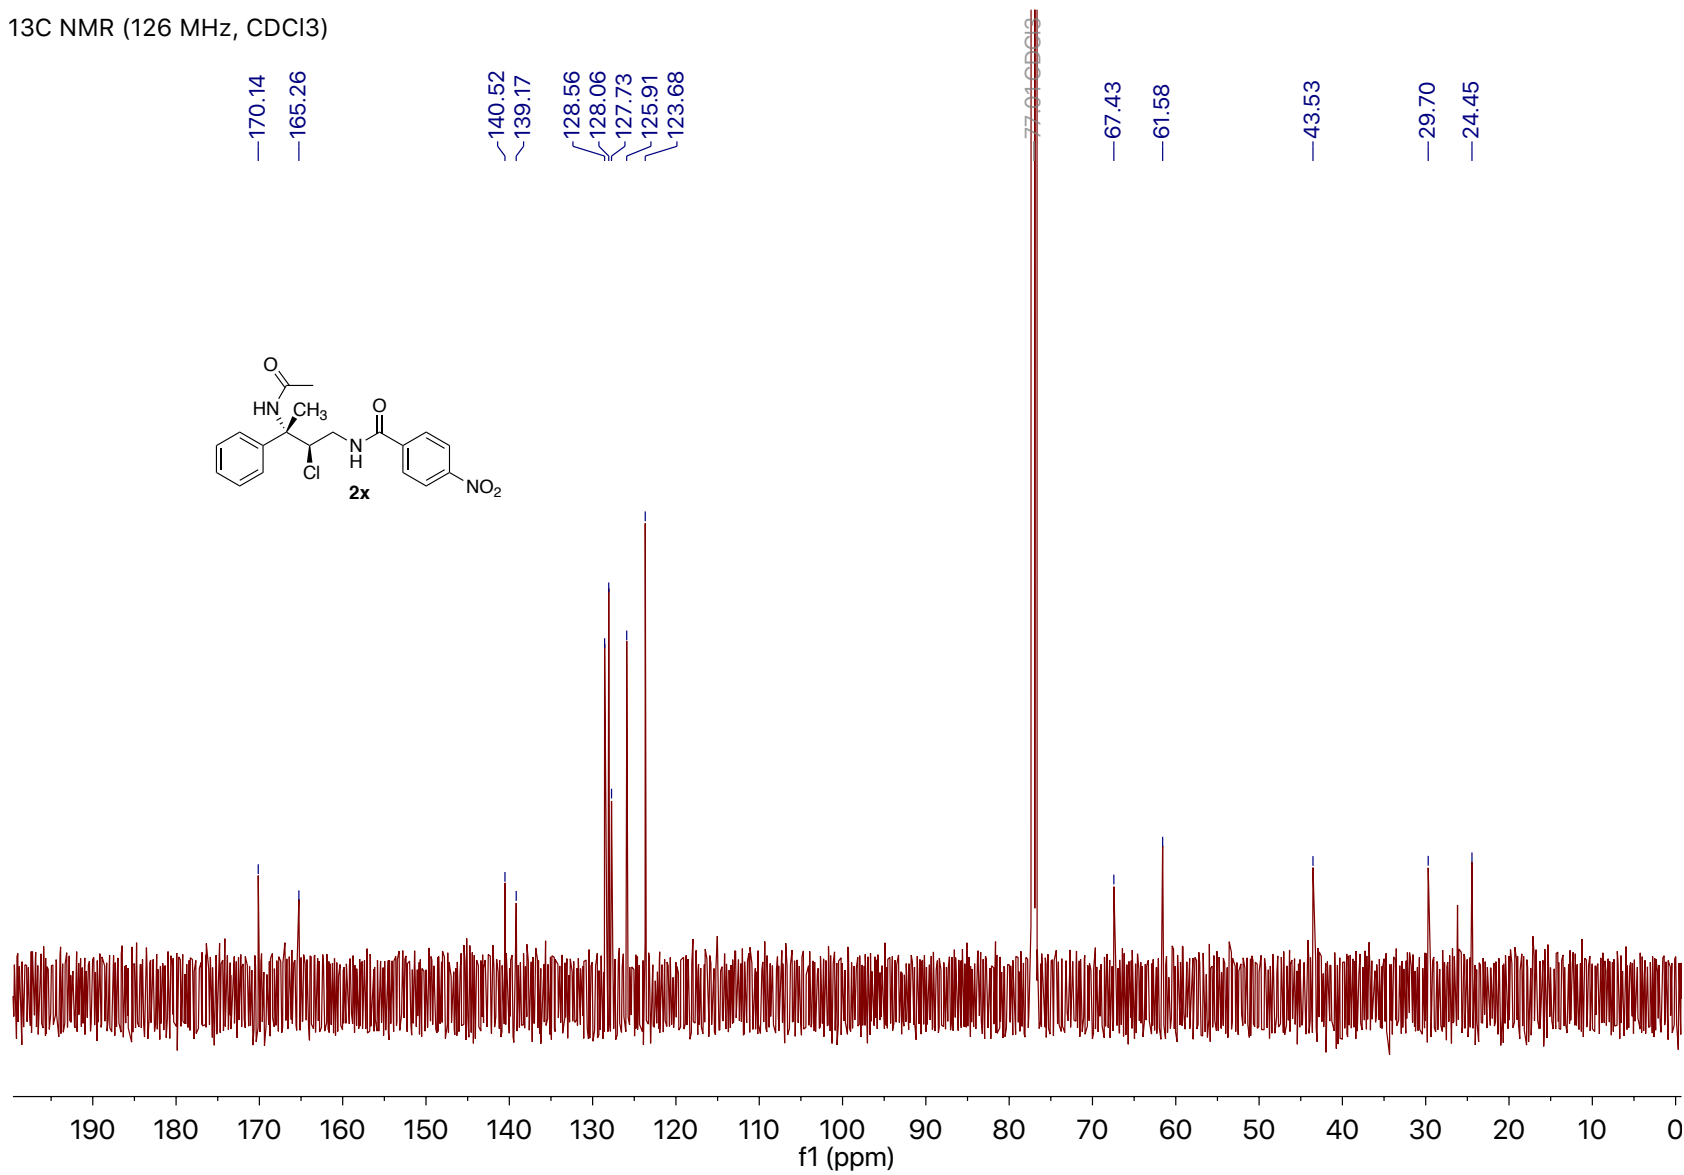

1H NMR (500 MHz, CDCl3)

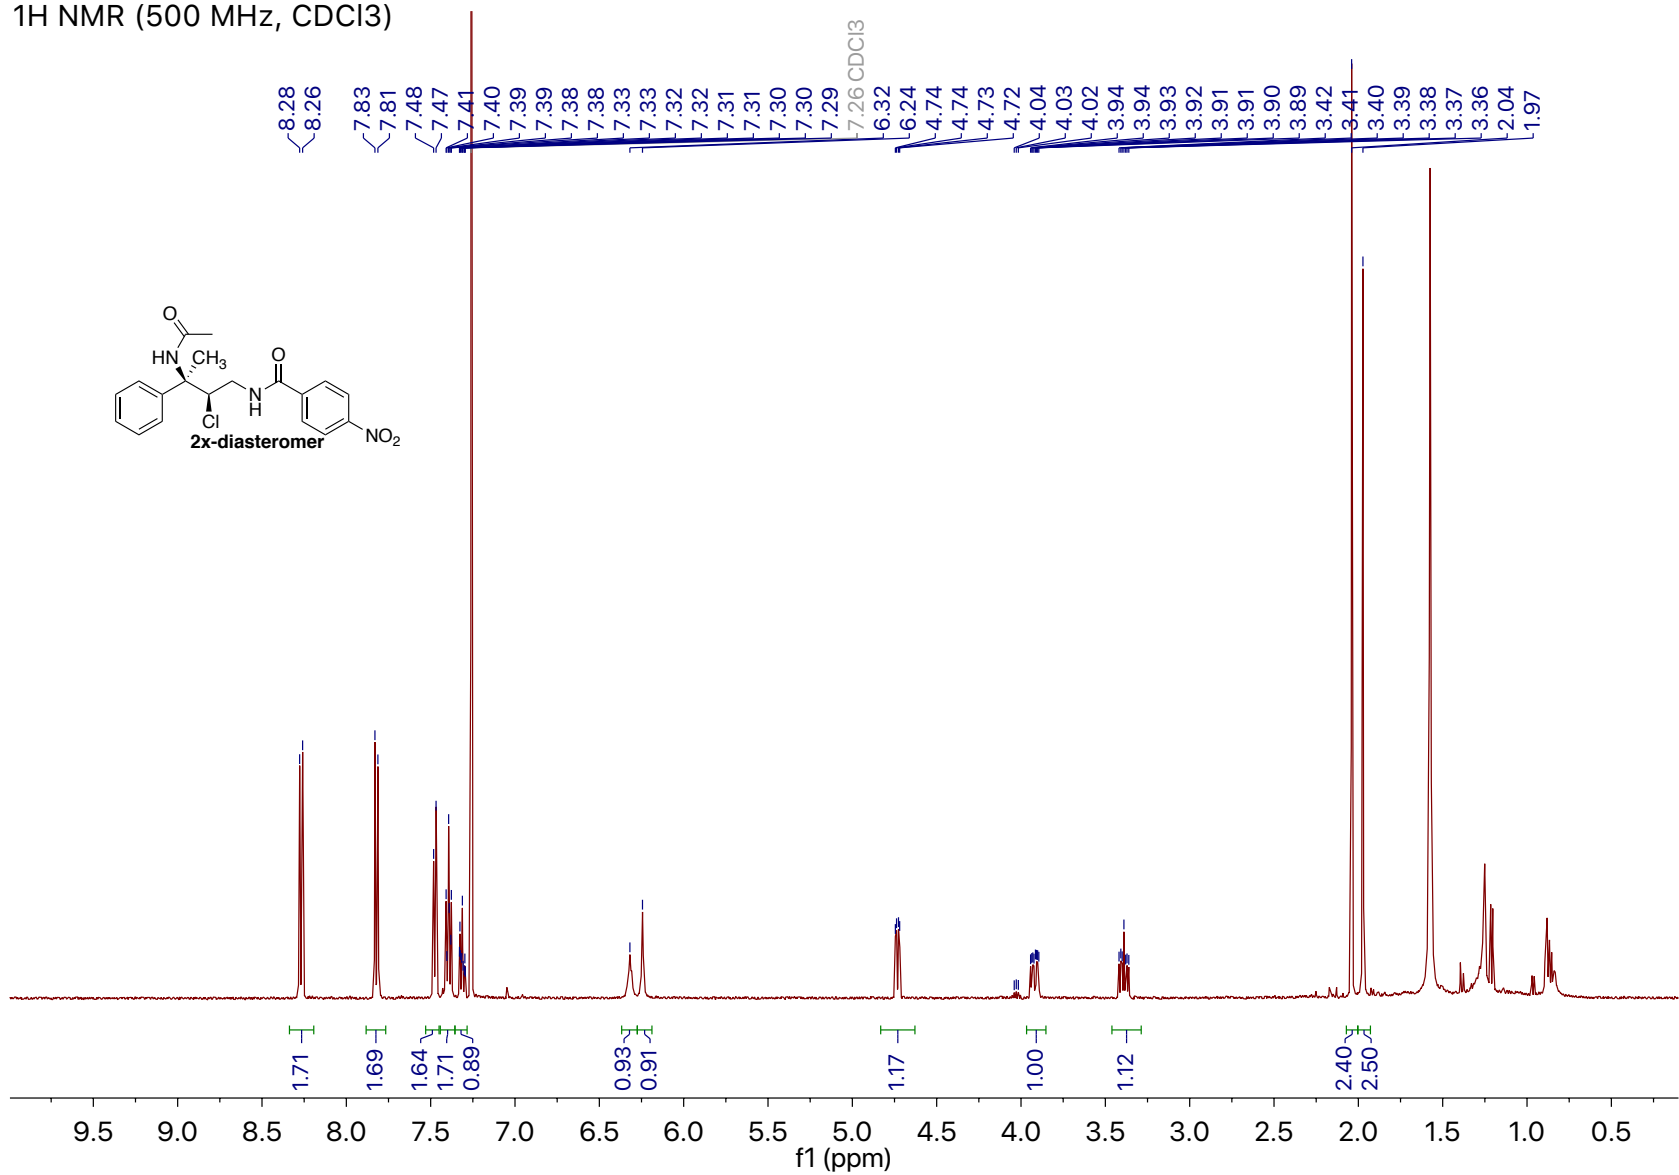

<sup>13</sup>C NMR (126 MHz, CDCl<sub>3</sub>)

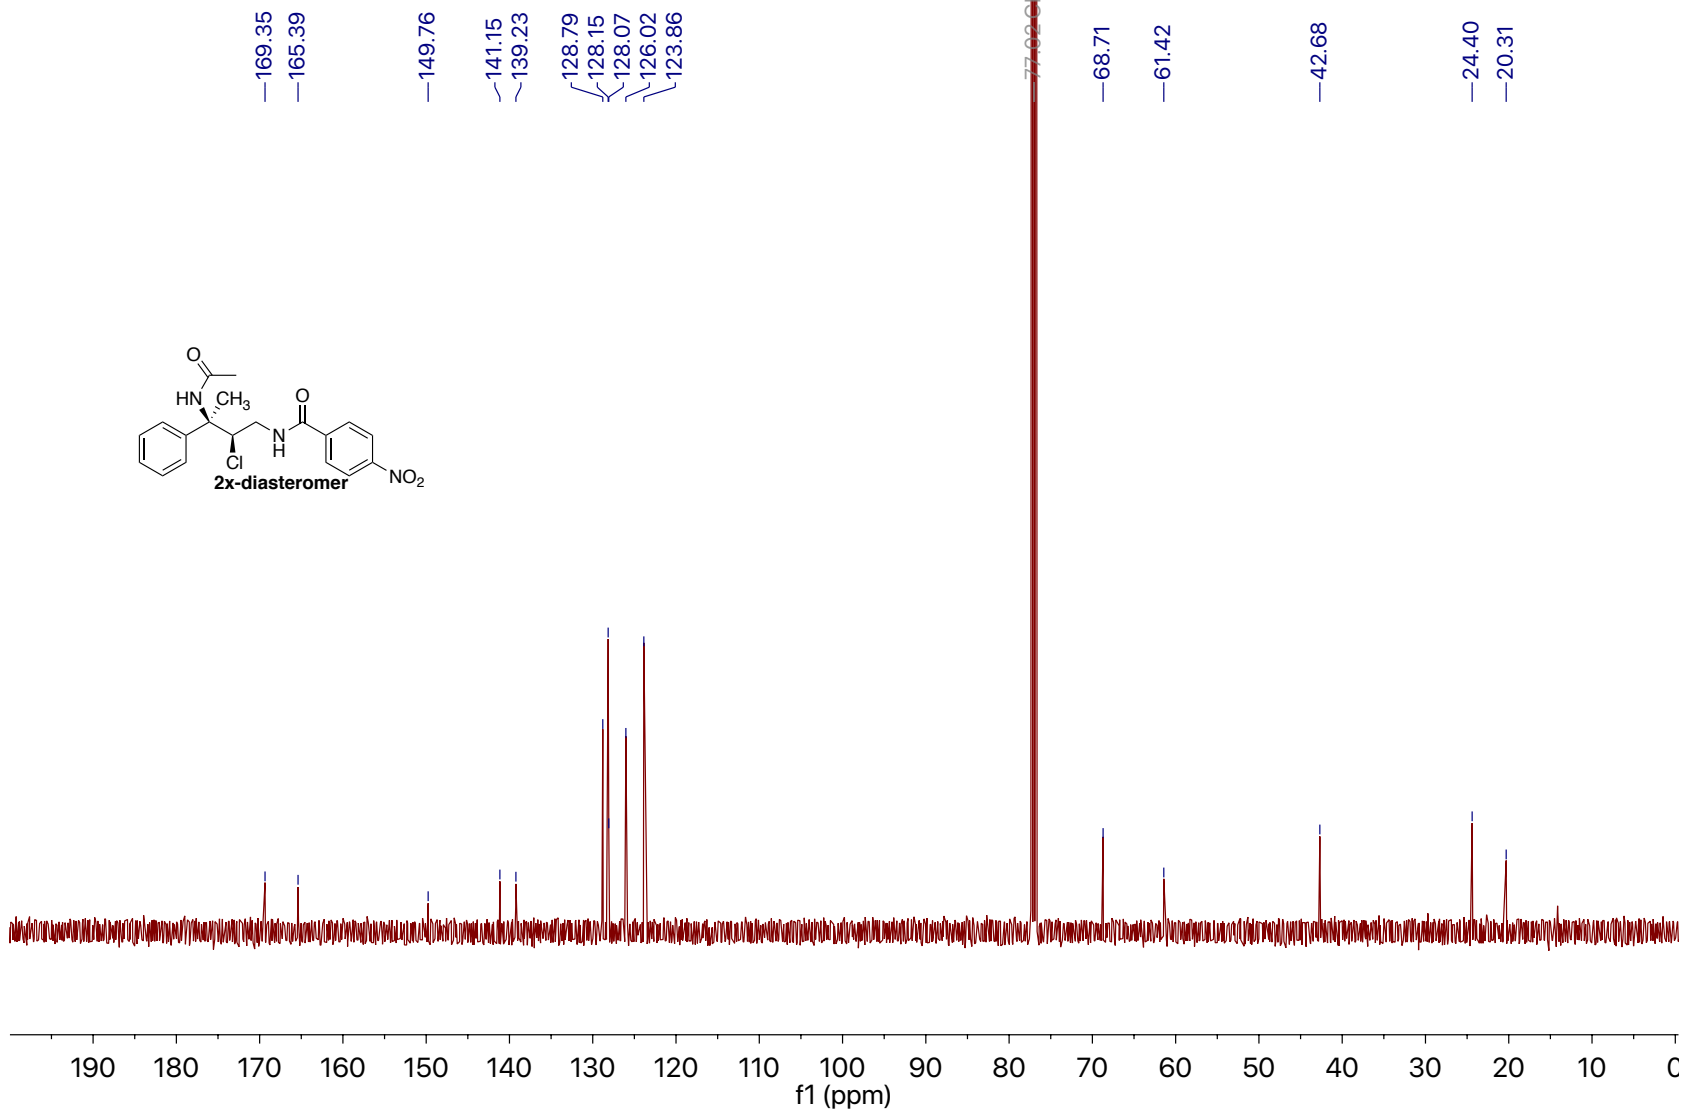

1H NMR (500 MHz, CDCl3)

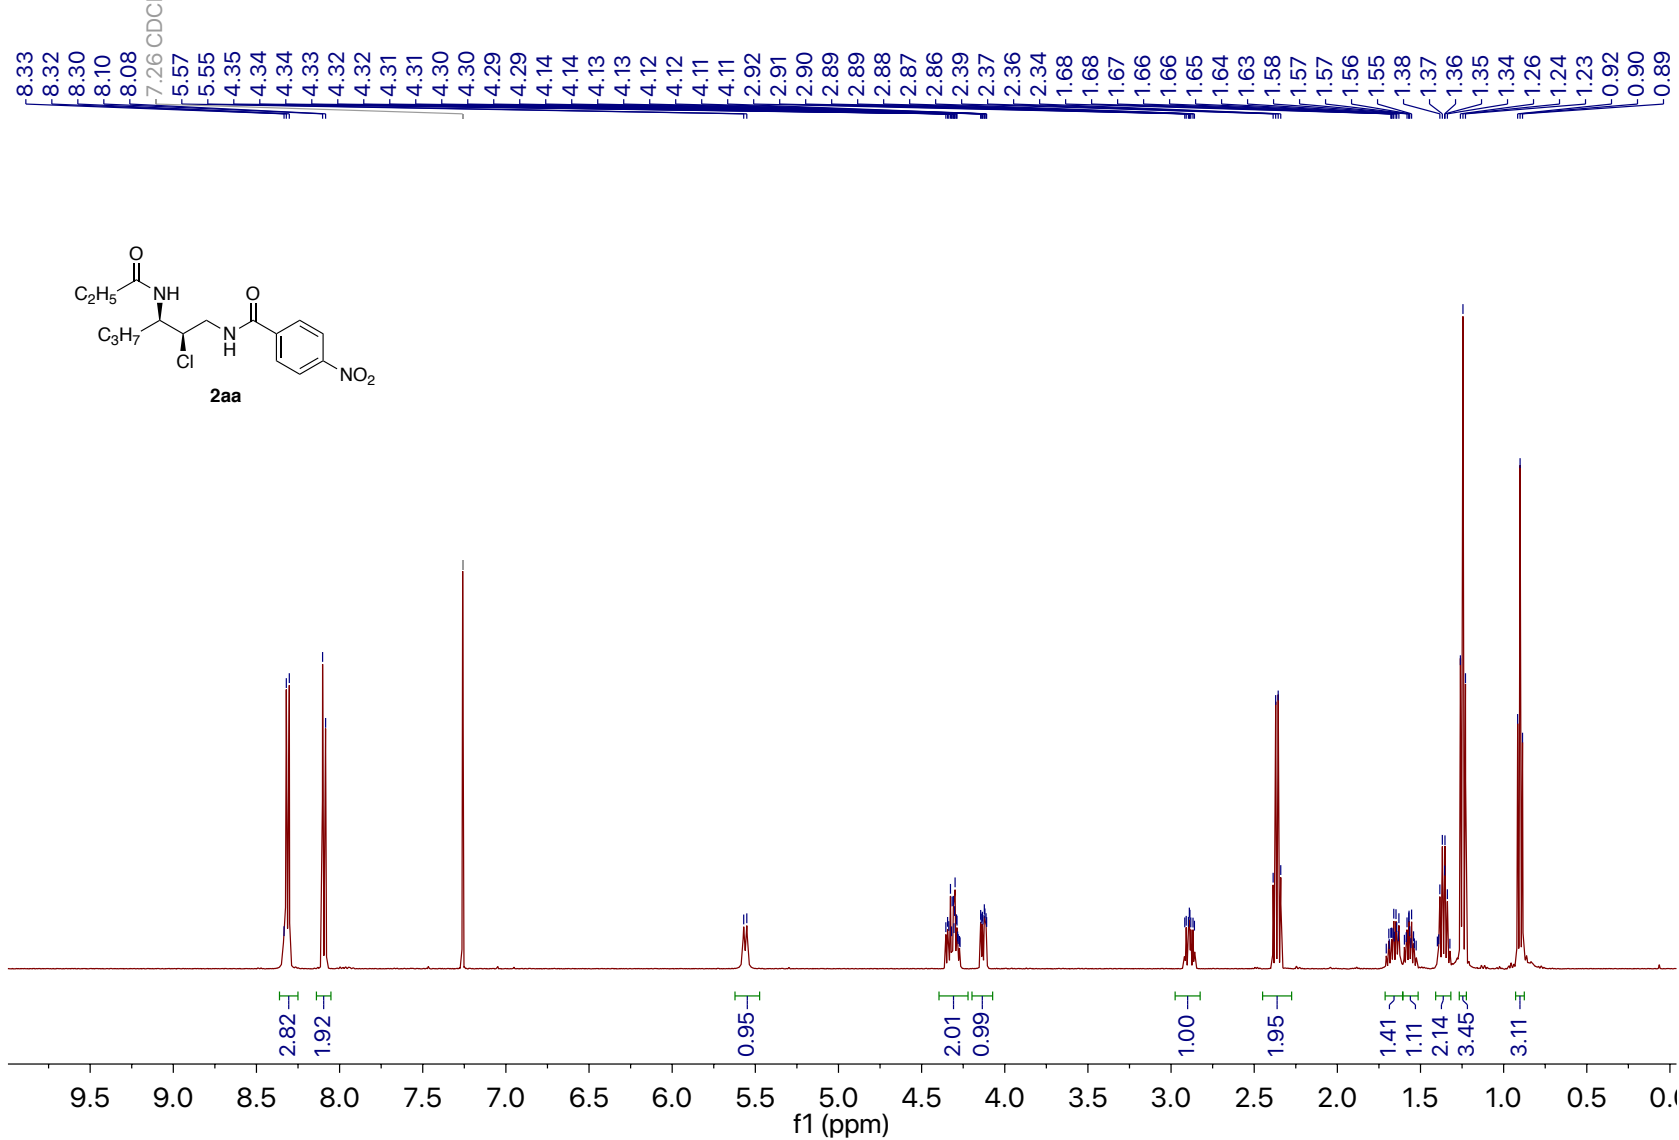

13C NMR (126 MHz, CDCl3)

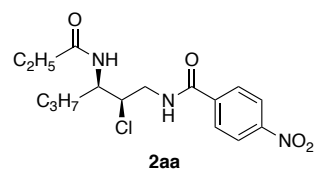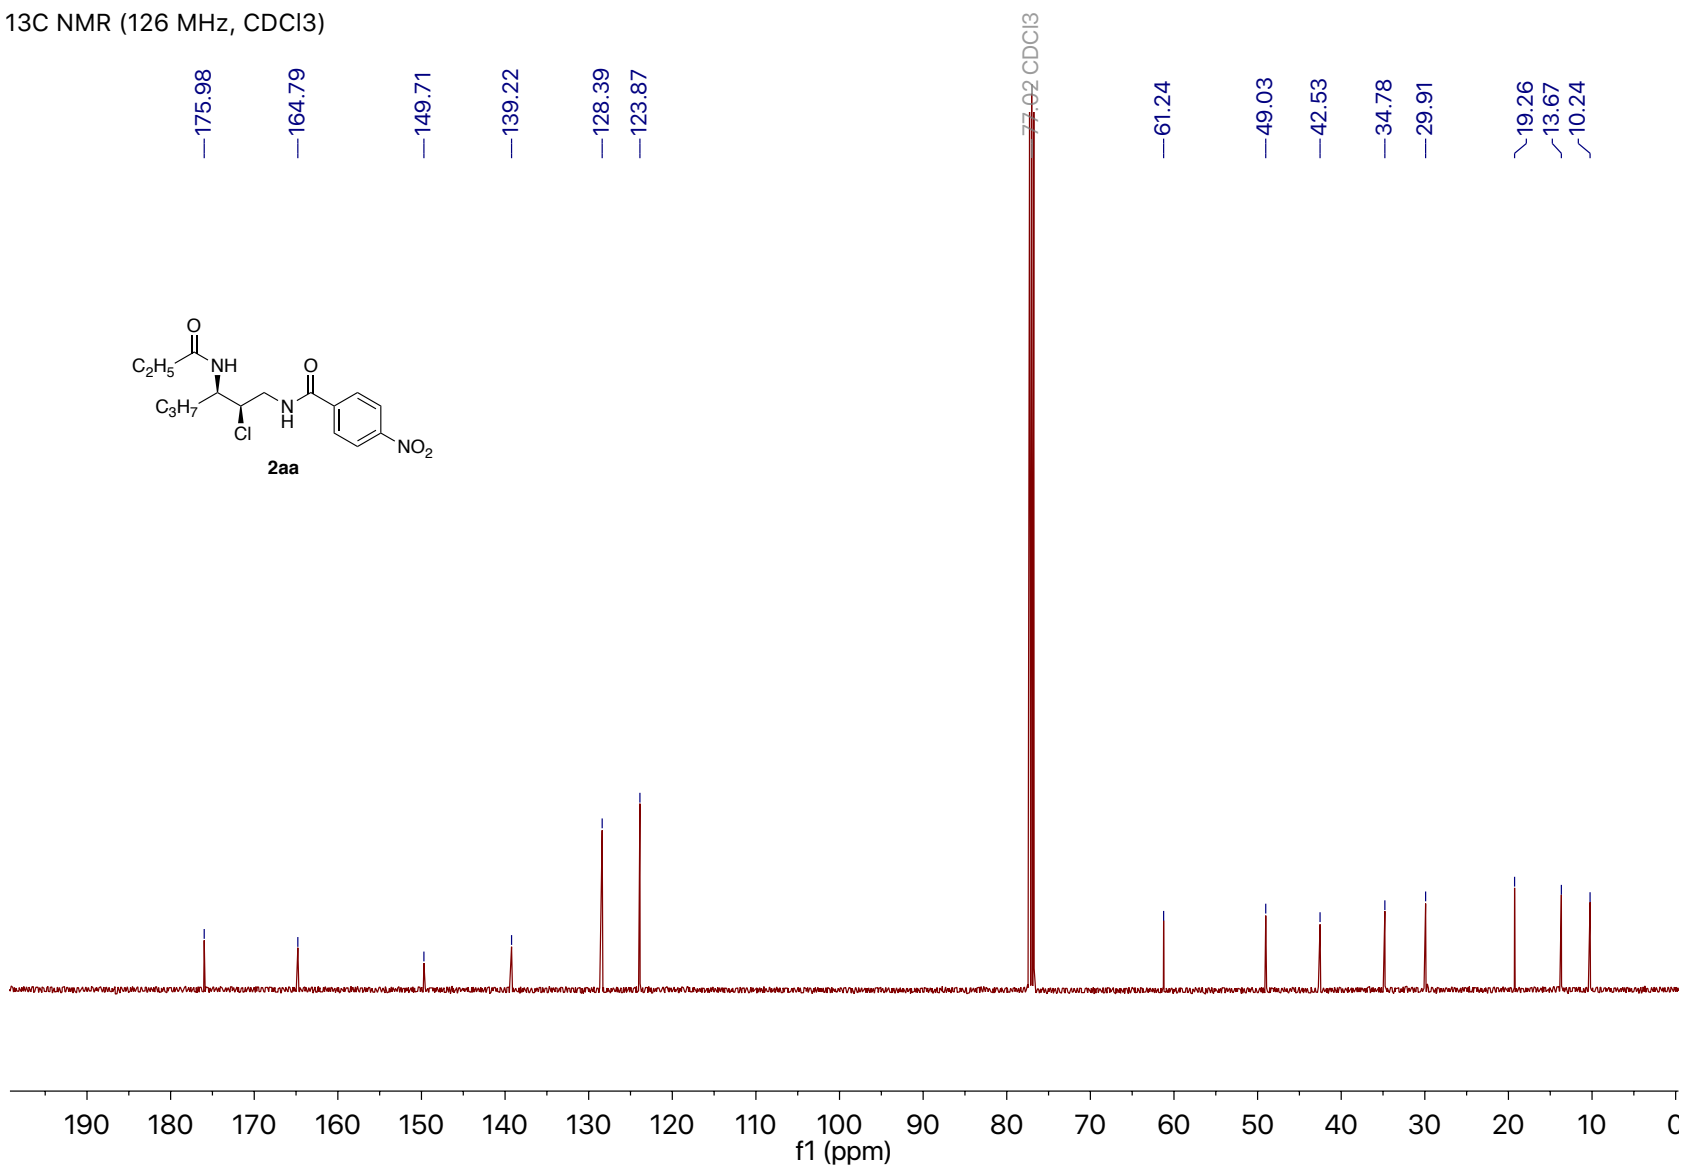

1H NMR (500 MHz, CDCl3)

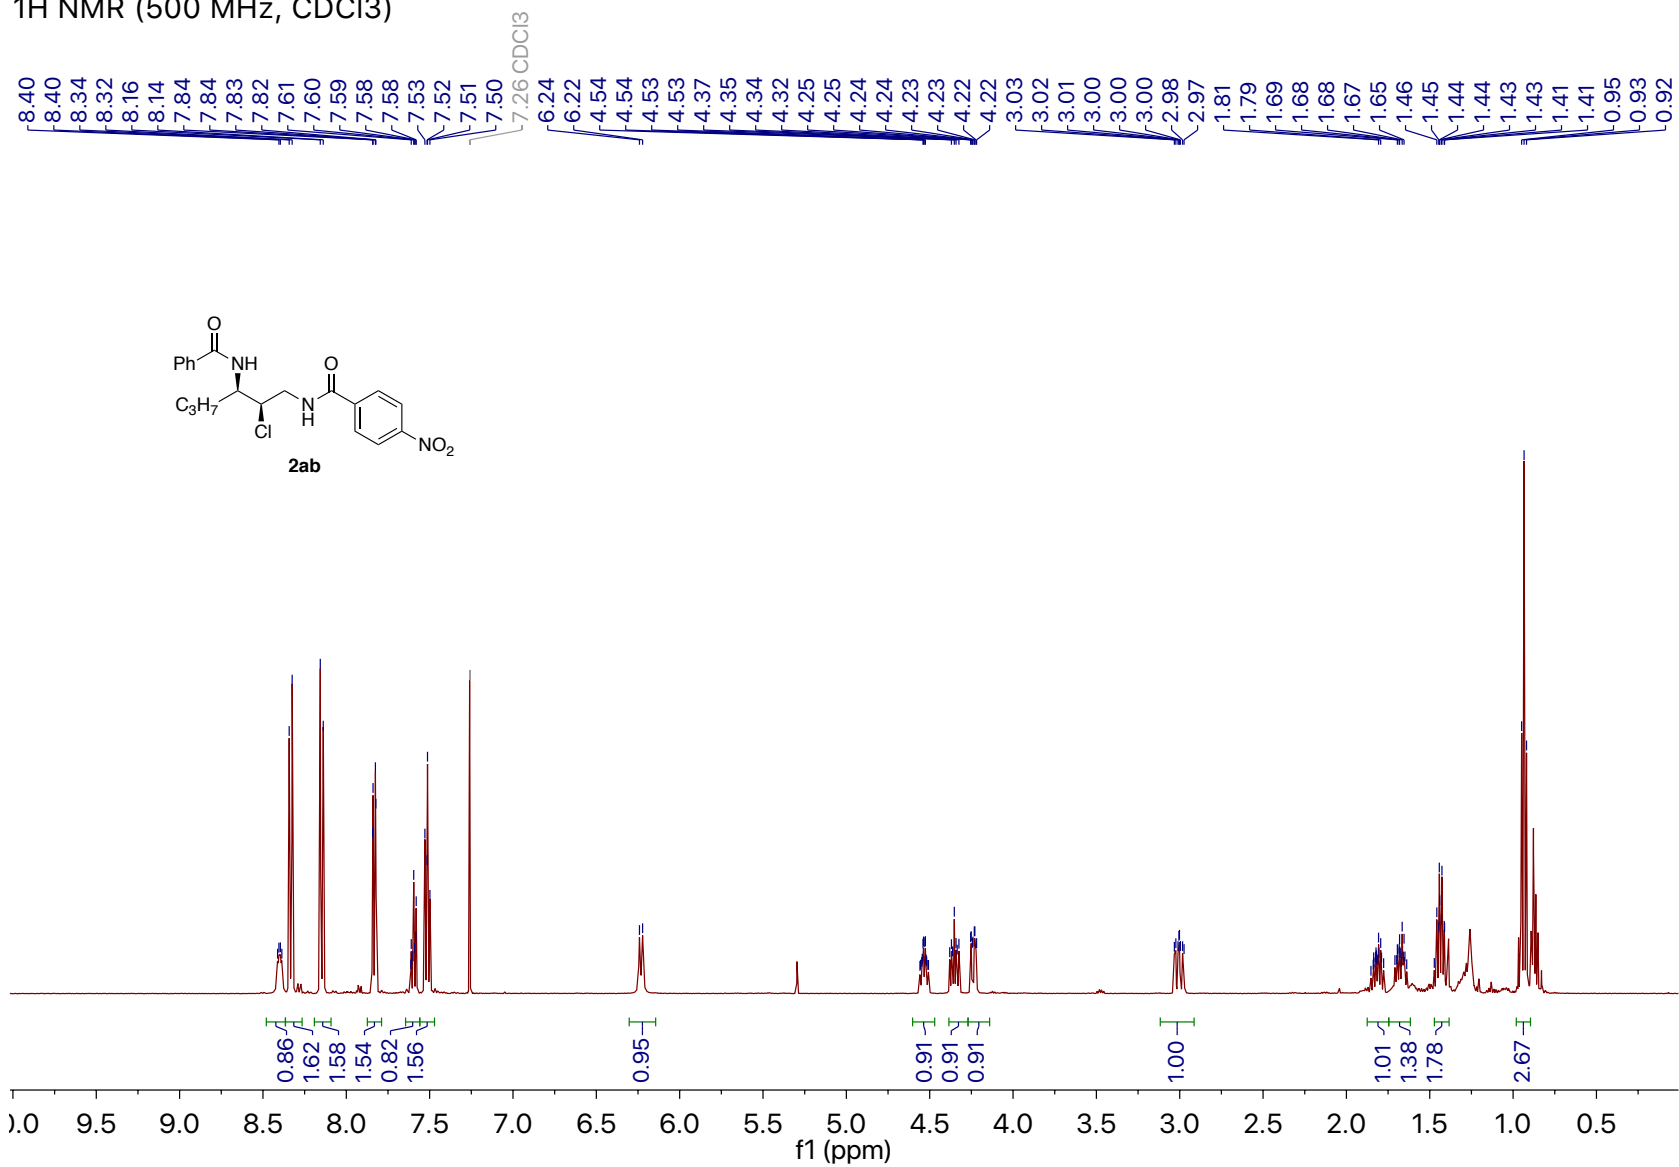

<sup>13</sup>C NMR (126 MHz, CDCl<sub>3</sub>)

—169.36

—164.88

—149.74

—139.26

—133.25

—132.47

—128.97

—128.45

—127.08

—123.89

—77.06 CDCl<sub>3</sub>

—61.54

—49.68

—42.71

—34.93

—19.38

—13.72

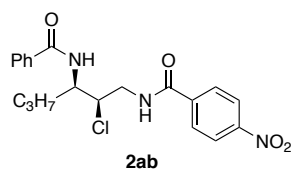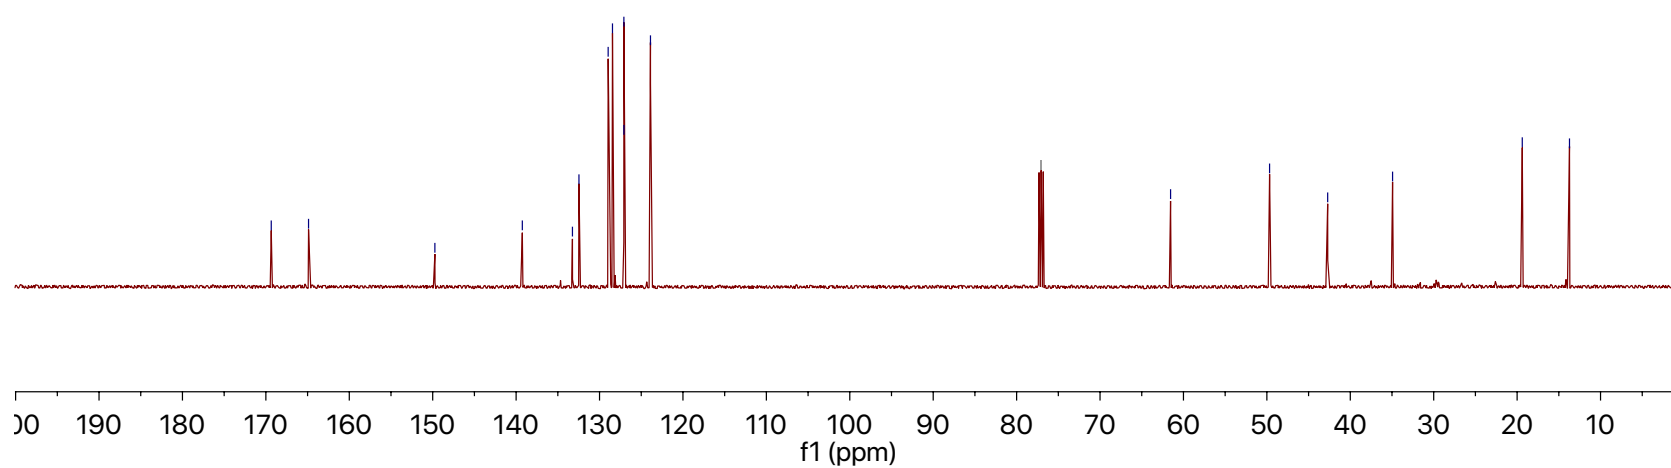

1H NMR (500 MHz, CDCl3)

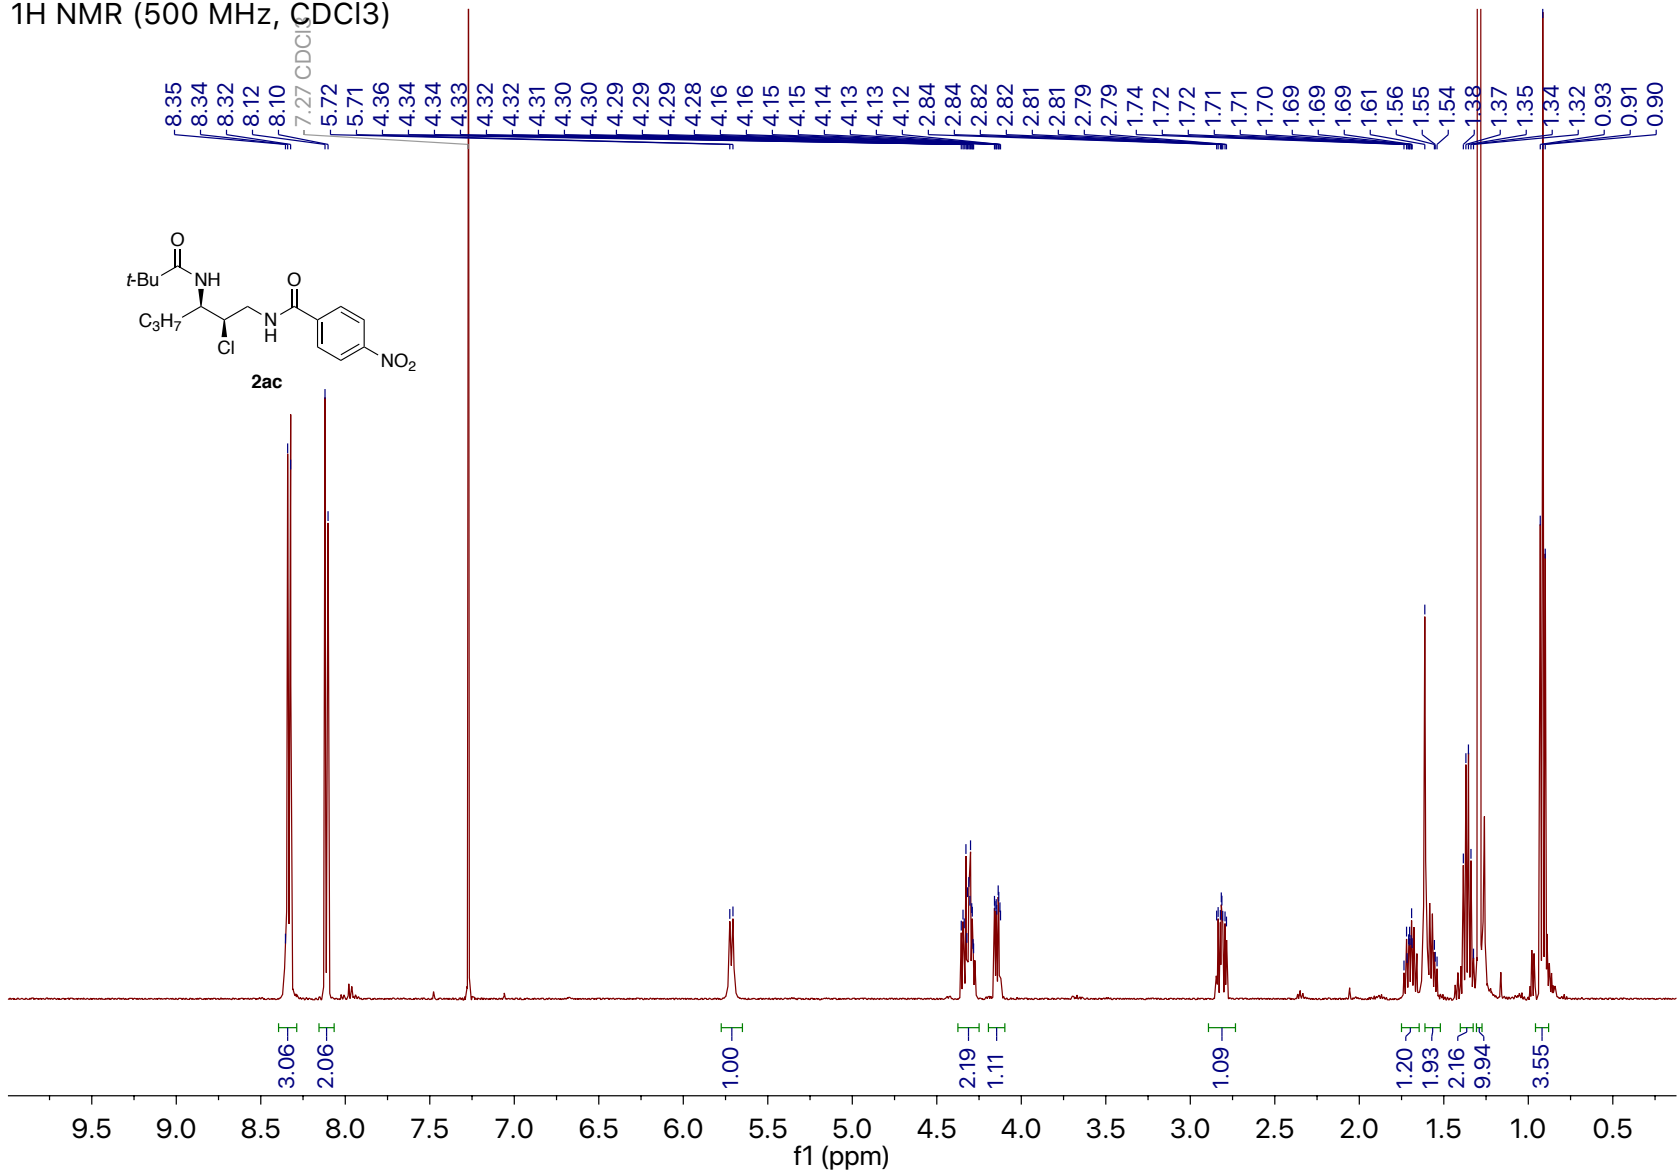



<sup>13</sup>C NMR (126 MHz, CDCl<sub>3</sub>)

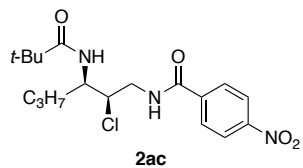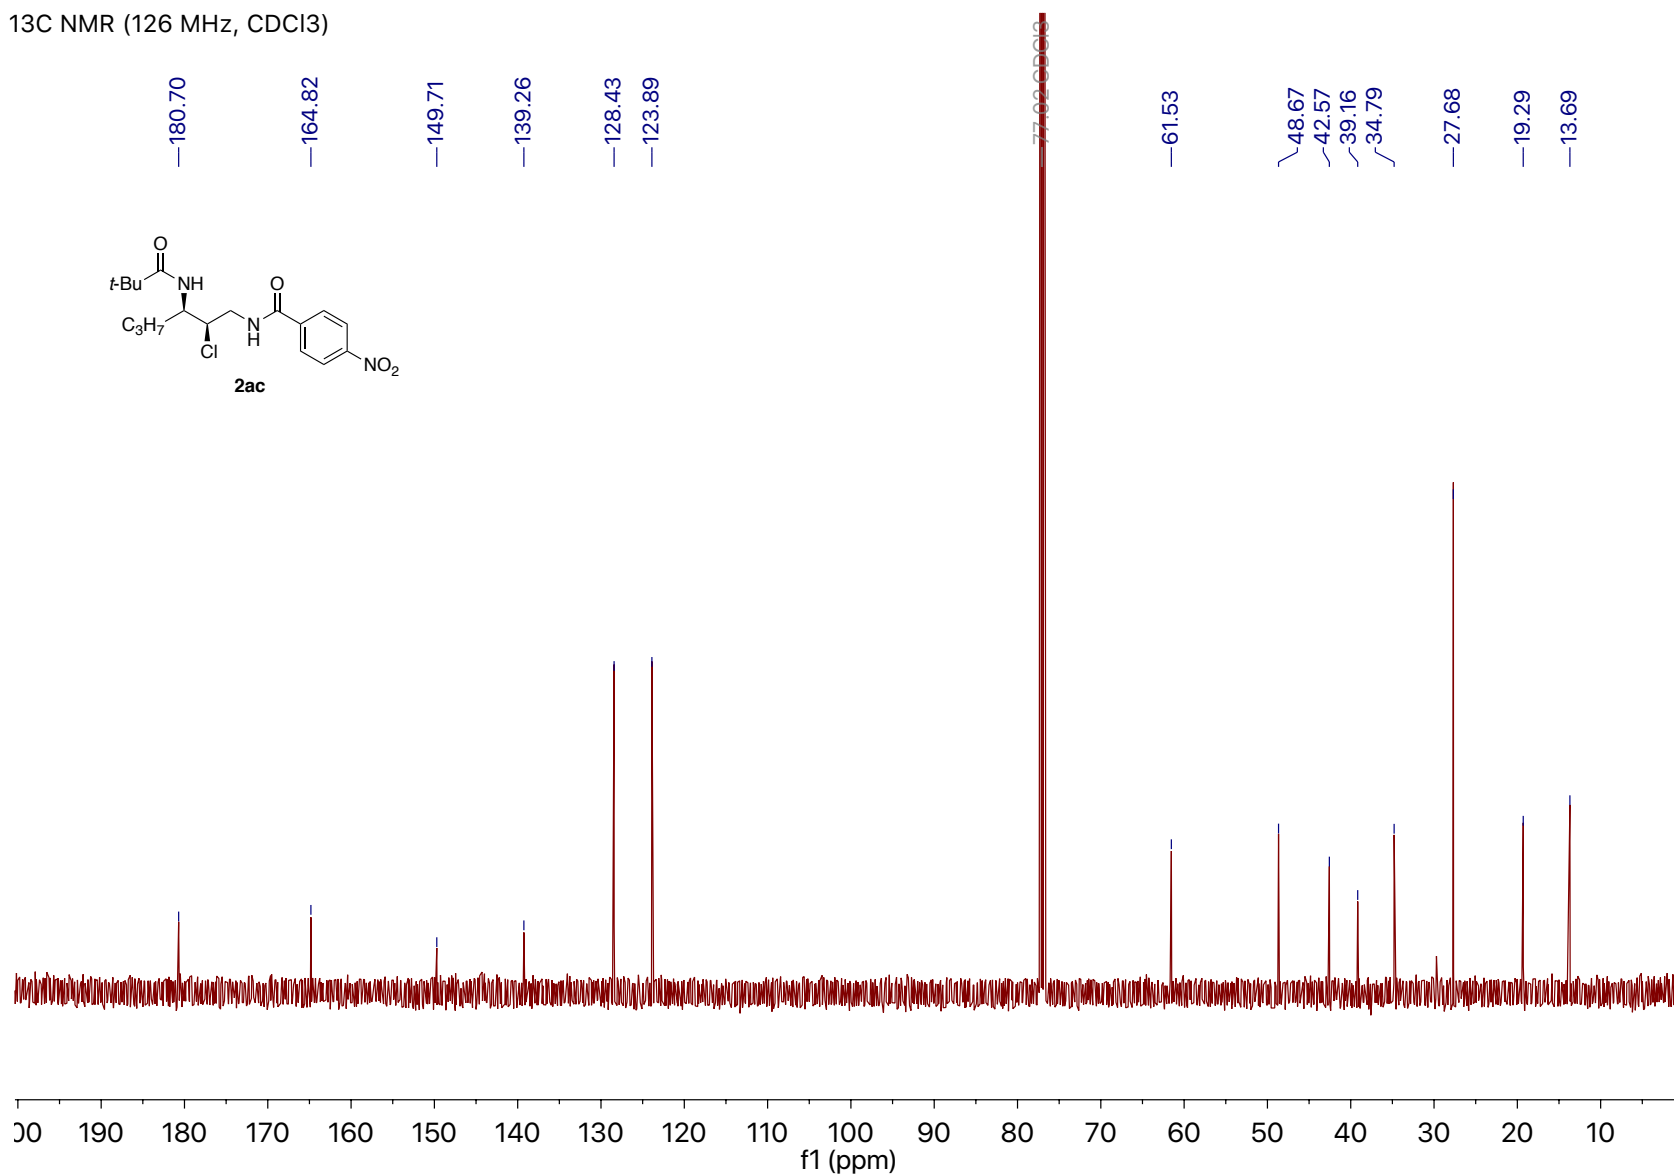

1H NMR (500 MHz, CDCl3)

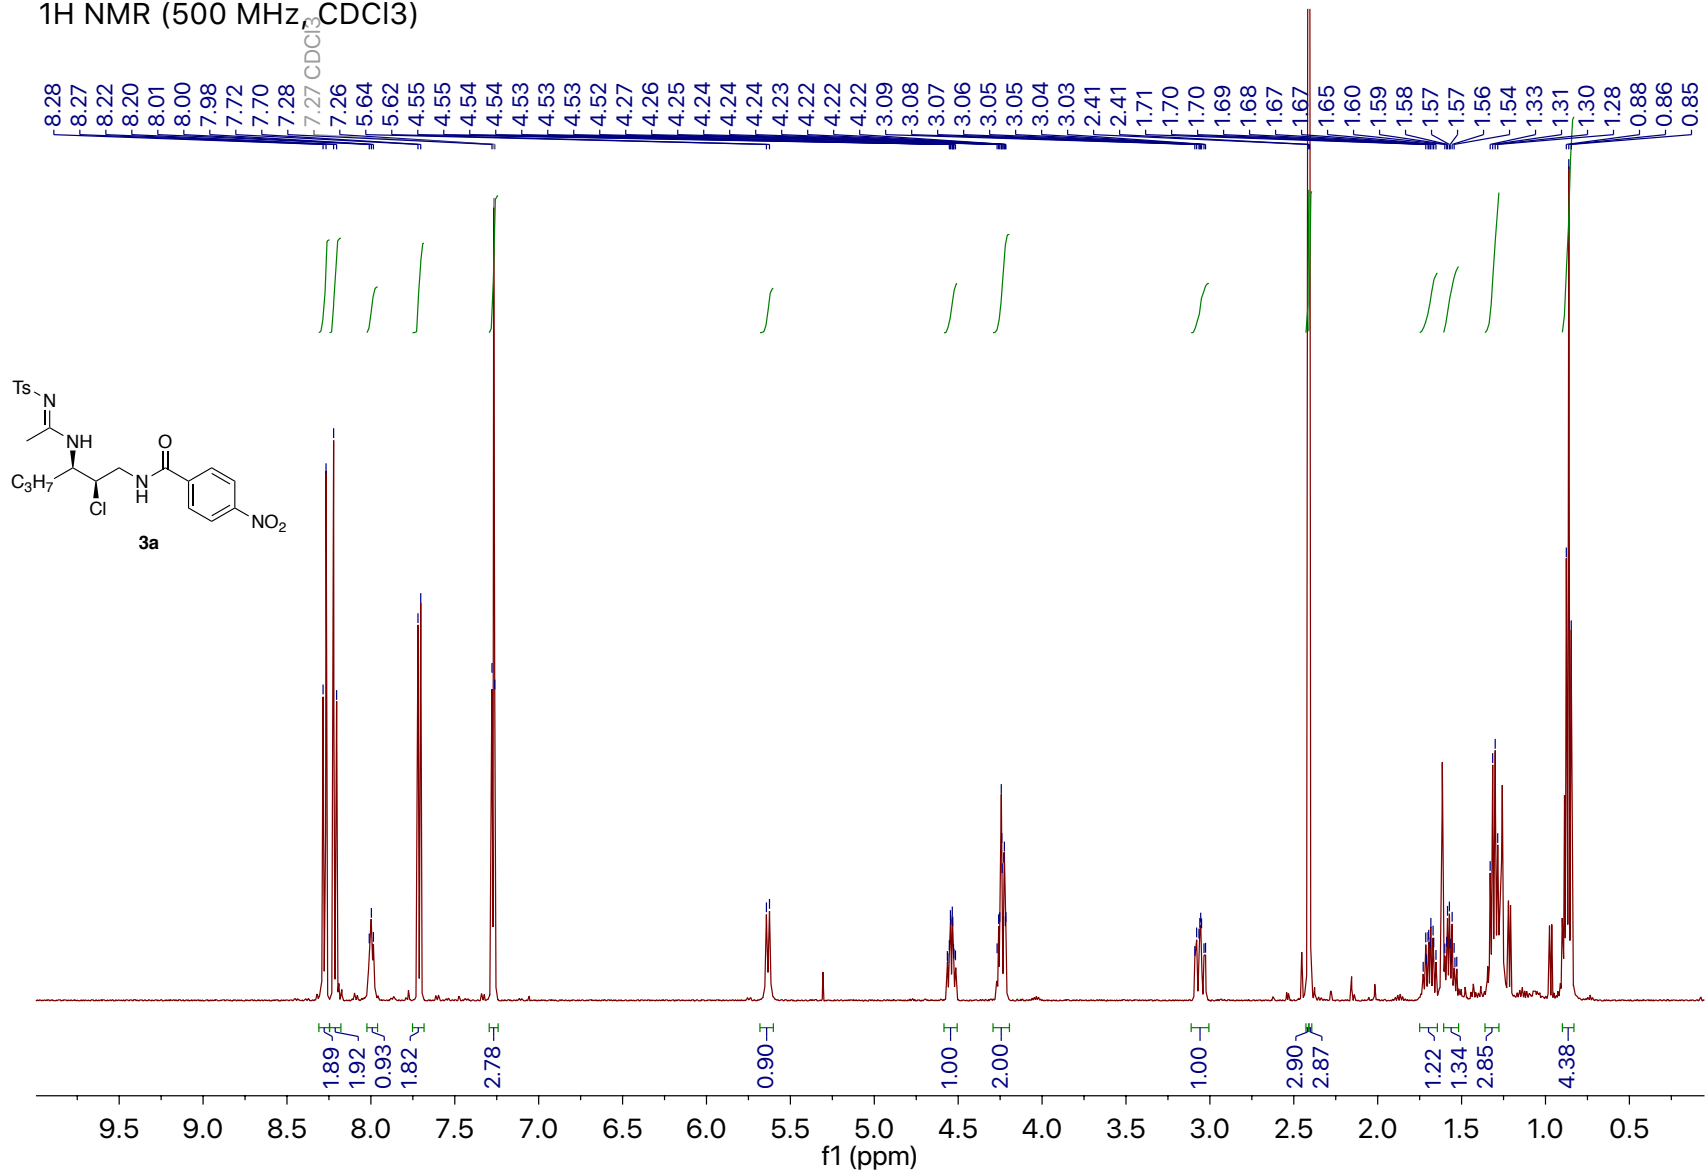

<sup>13</sup>C NMR (126 MHz, CDCl<sub>3</sub>)

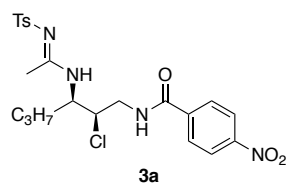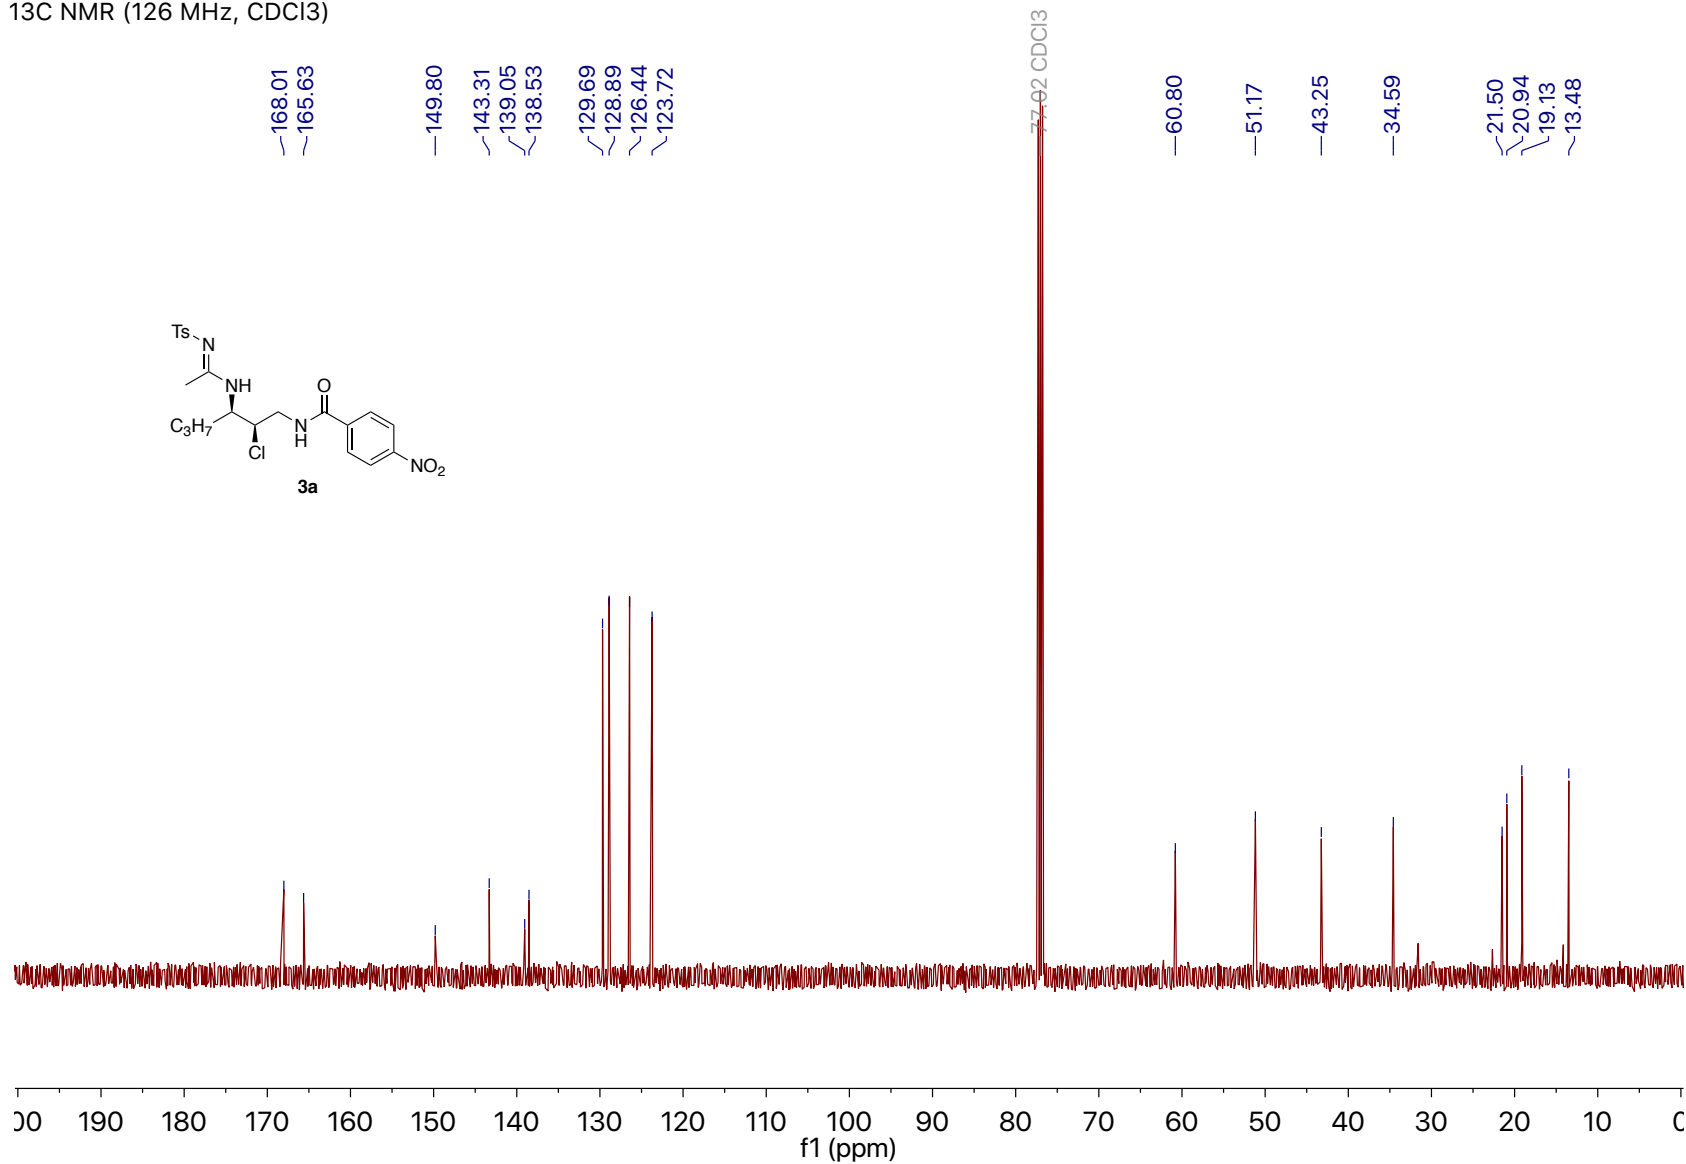

1H NMR (500 MHz, CDCl3)

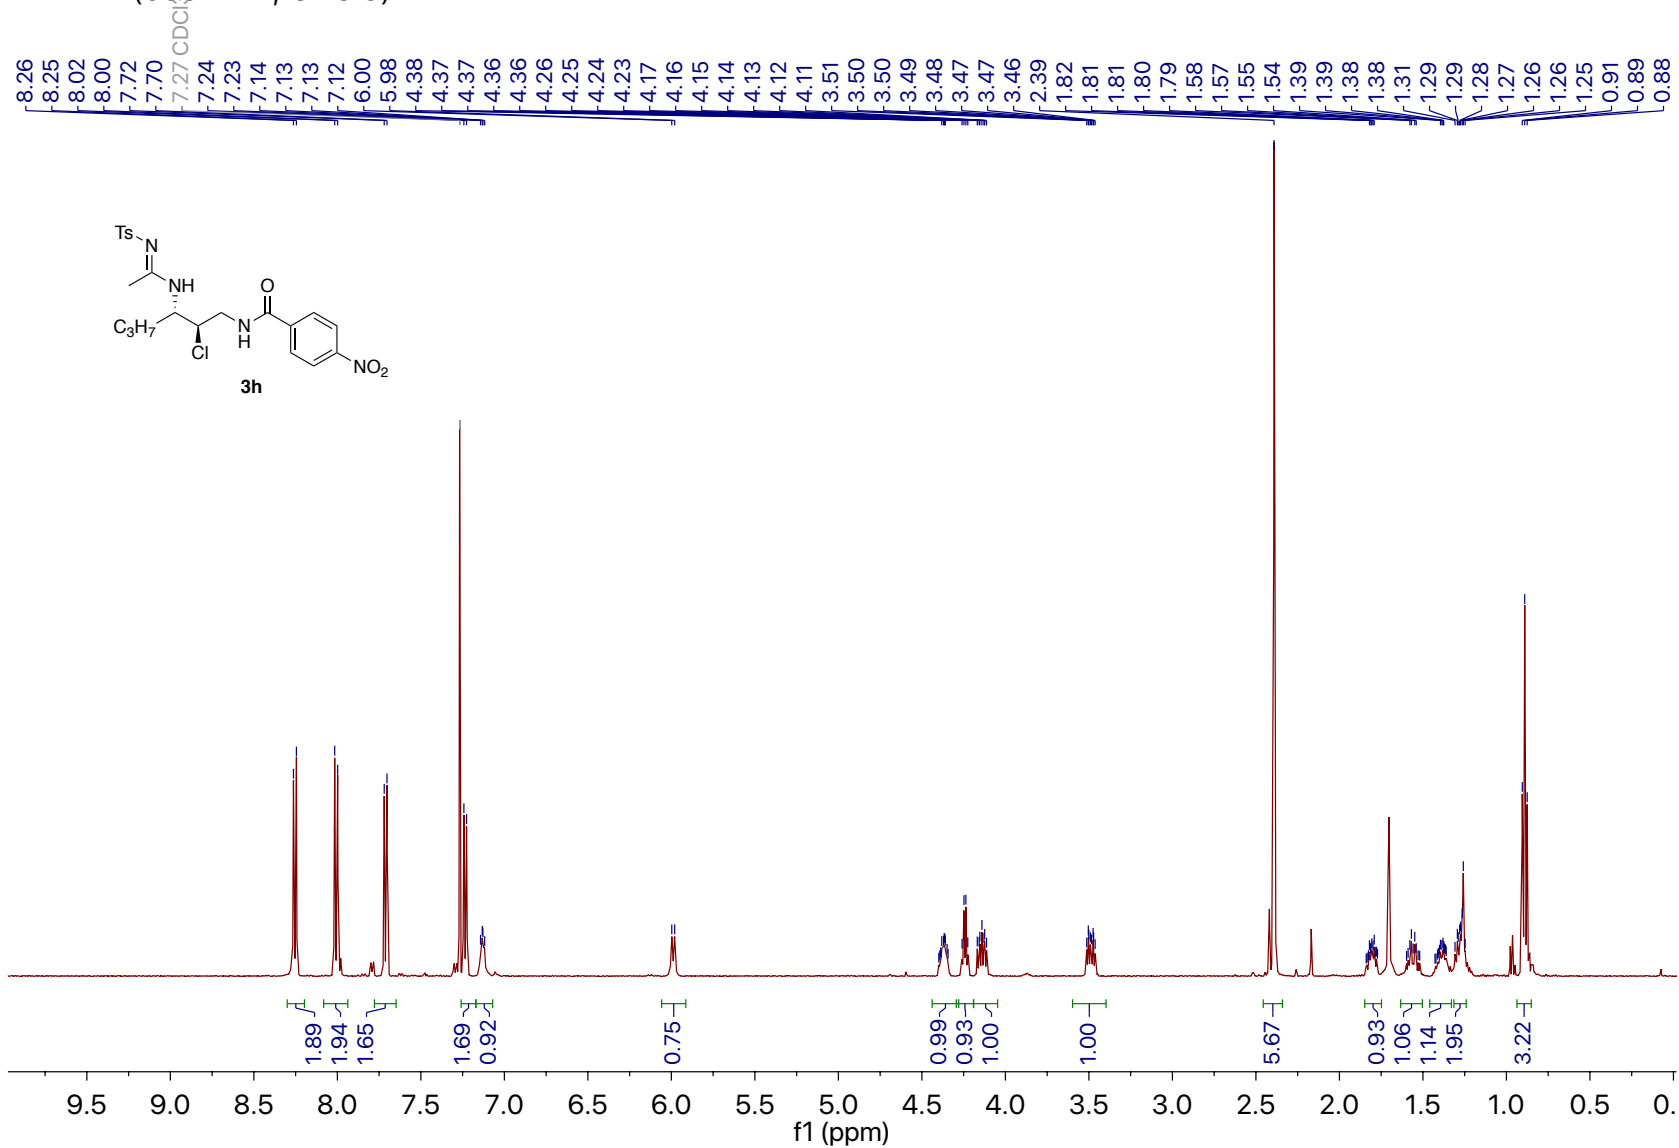

<sup>13</sup>C NMR (126 MHz, CDCl<sub>3</sub>)

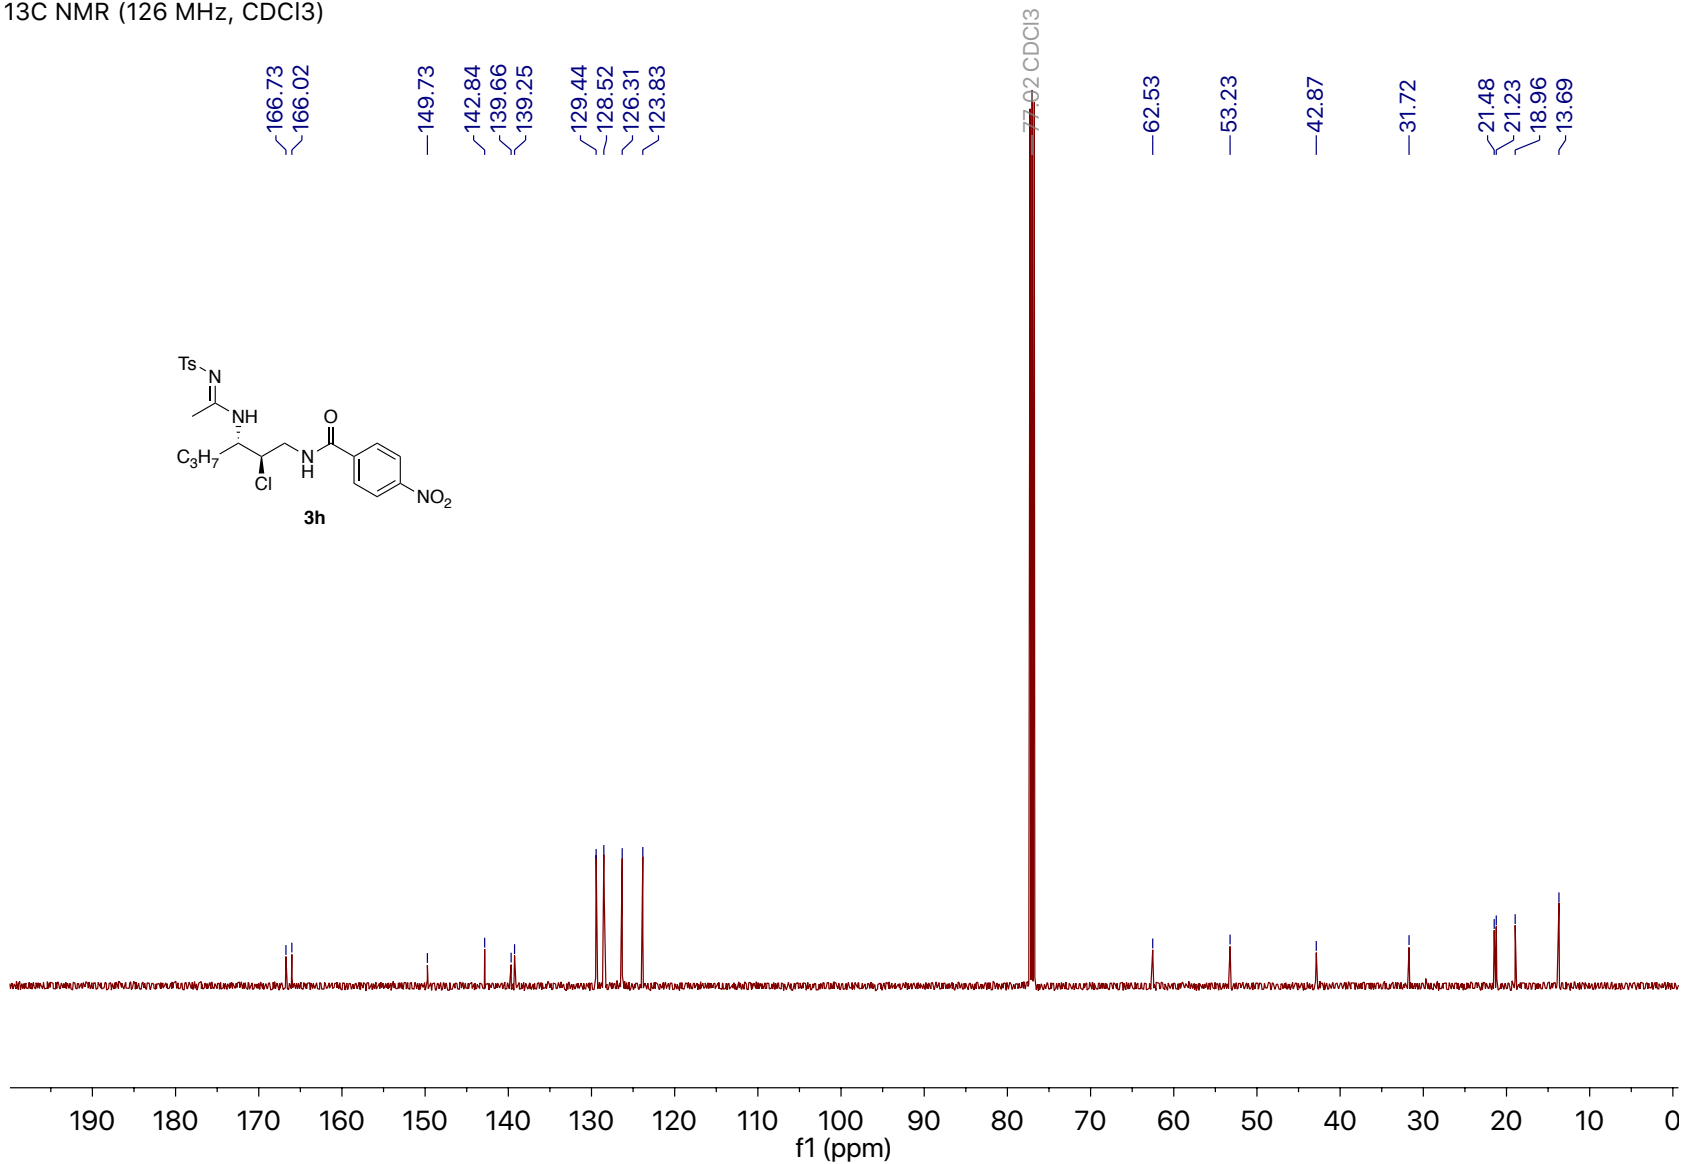

1H NMR (500 MHz, CDCl3)

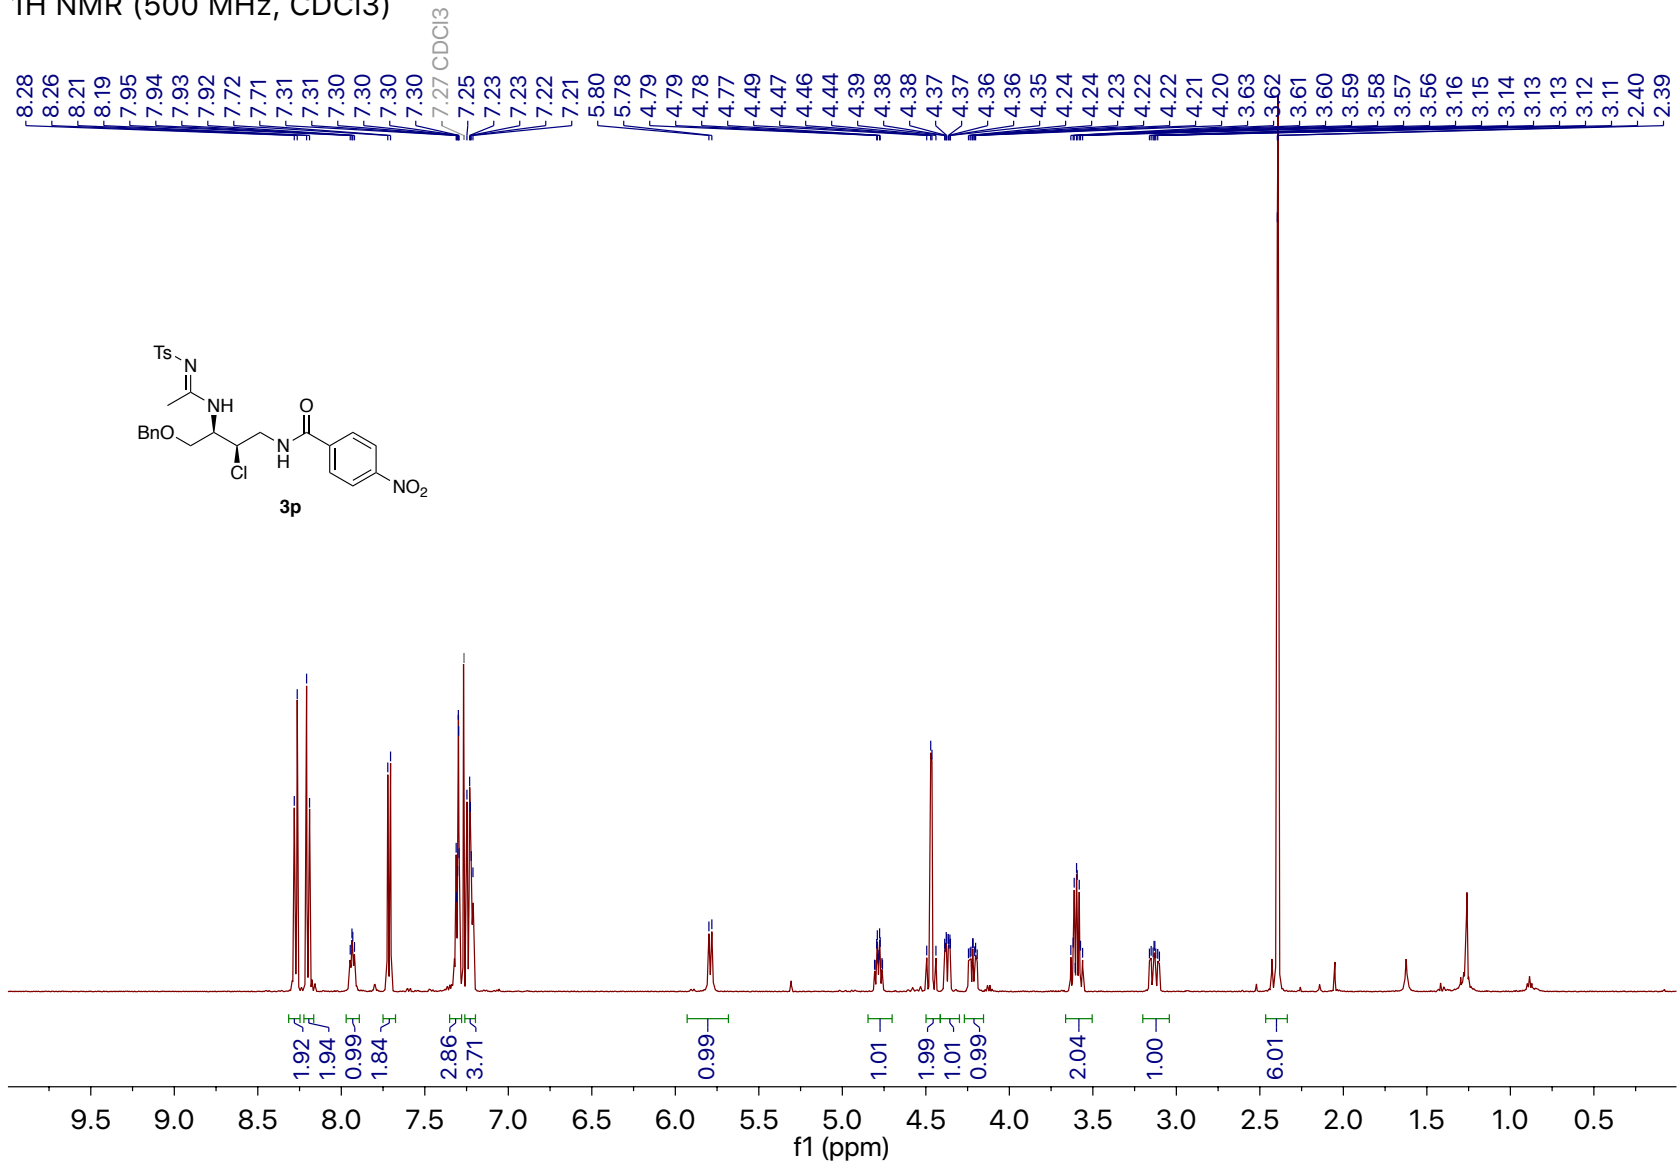

<sup>13</sup>C NMR (126 MHz, CDCl<sub>3</sub>)

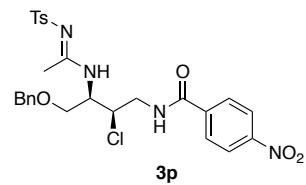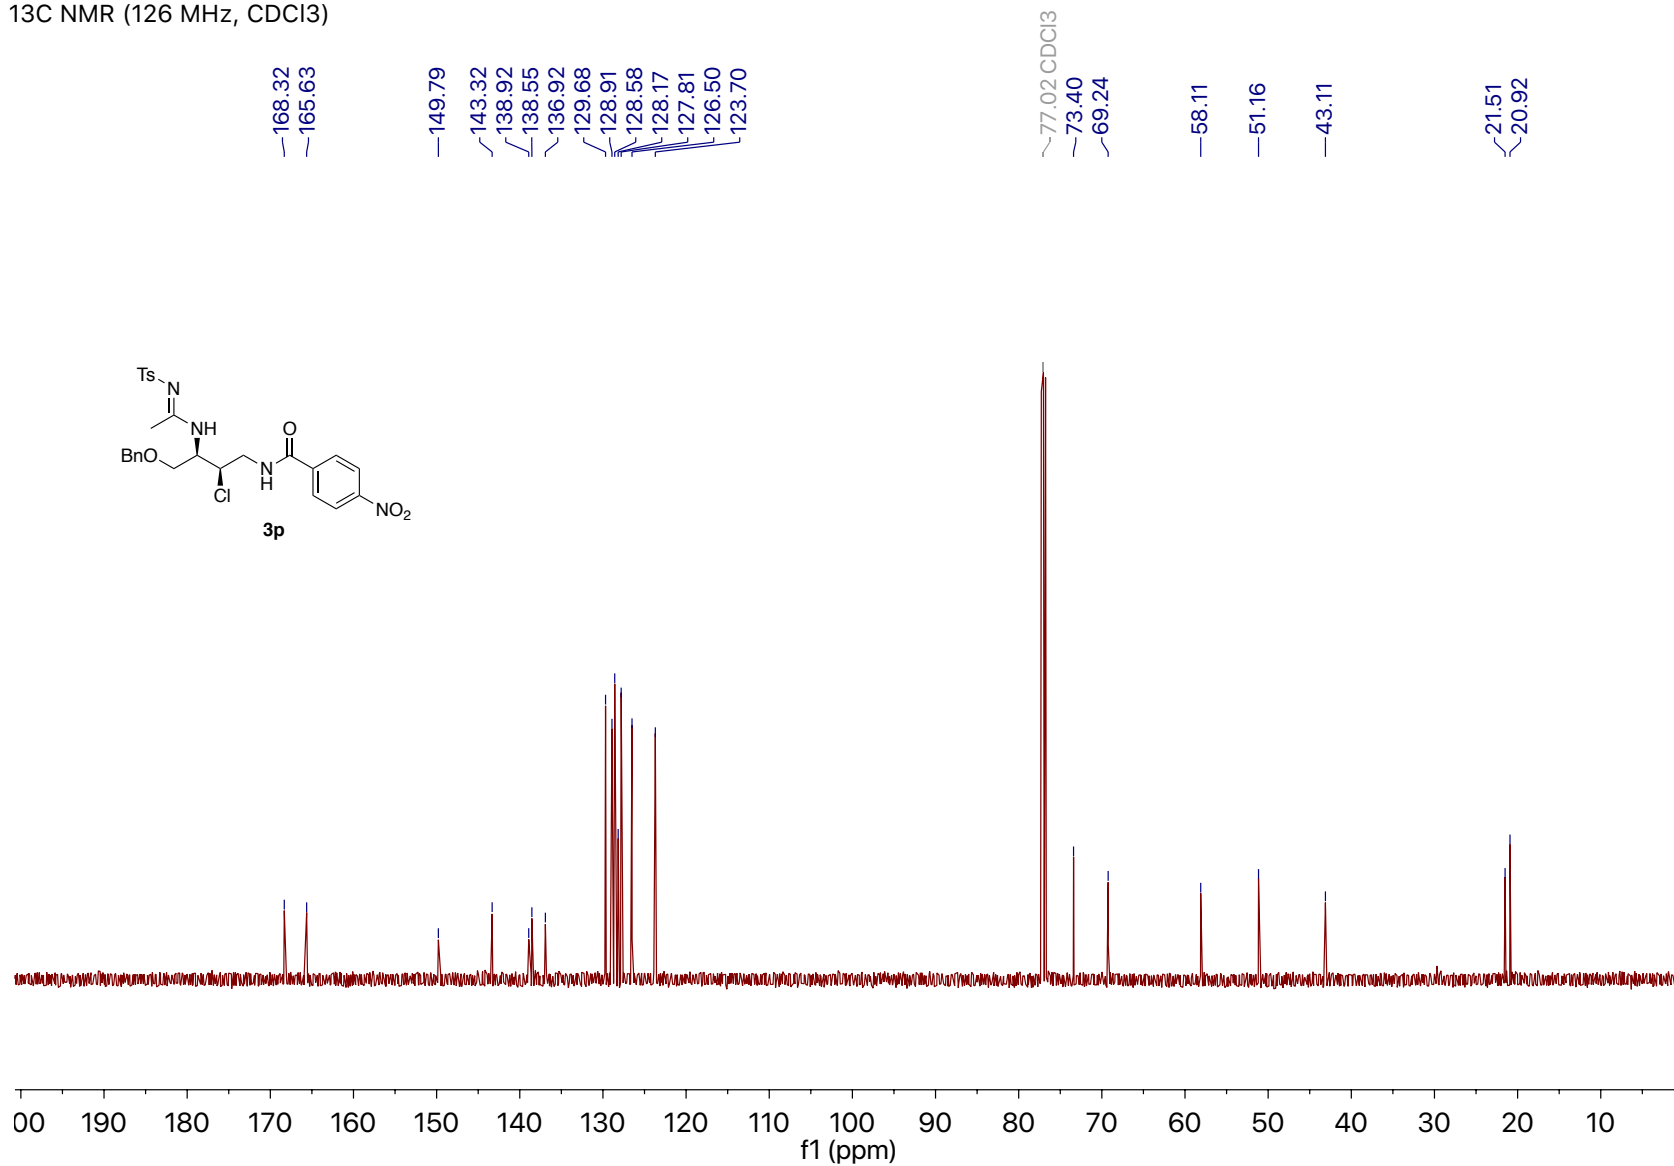

1H NMR (500 MHz, CDCl3)

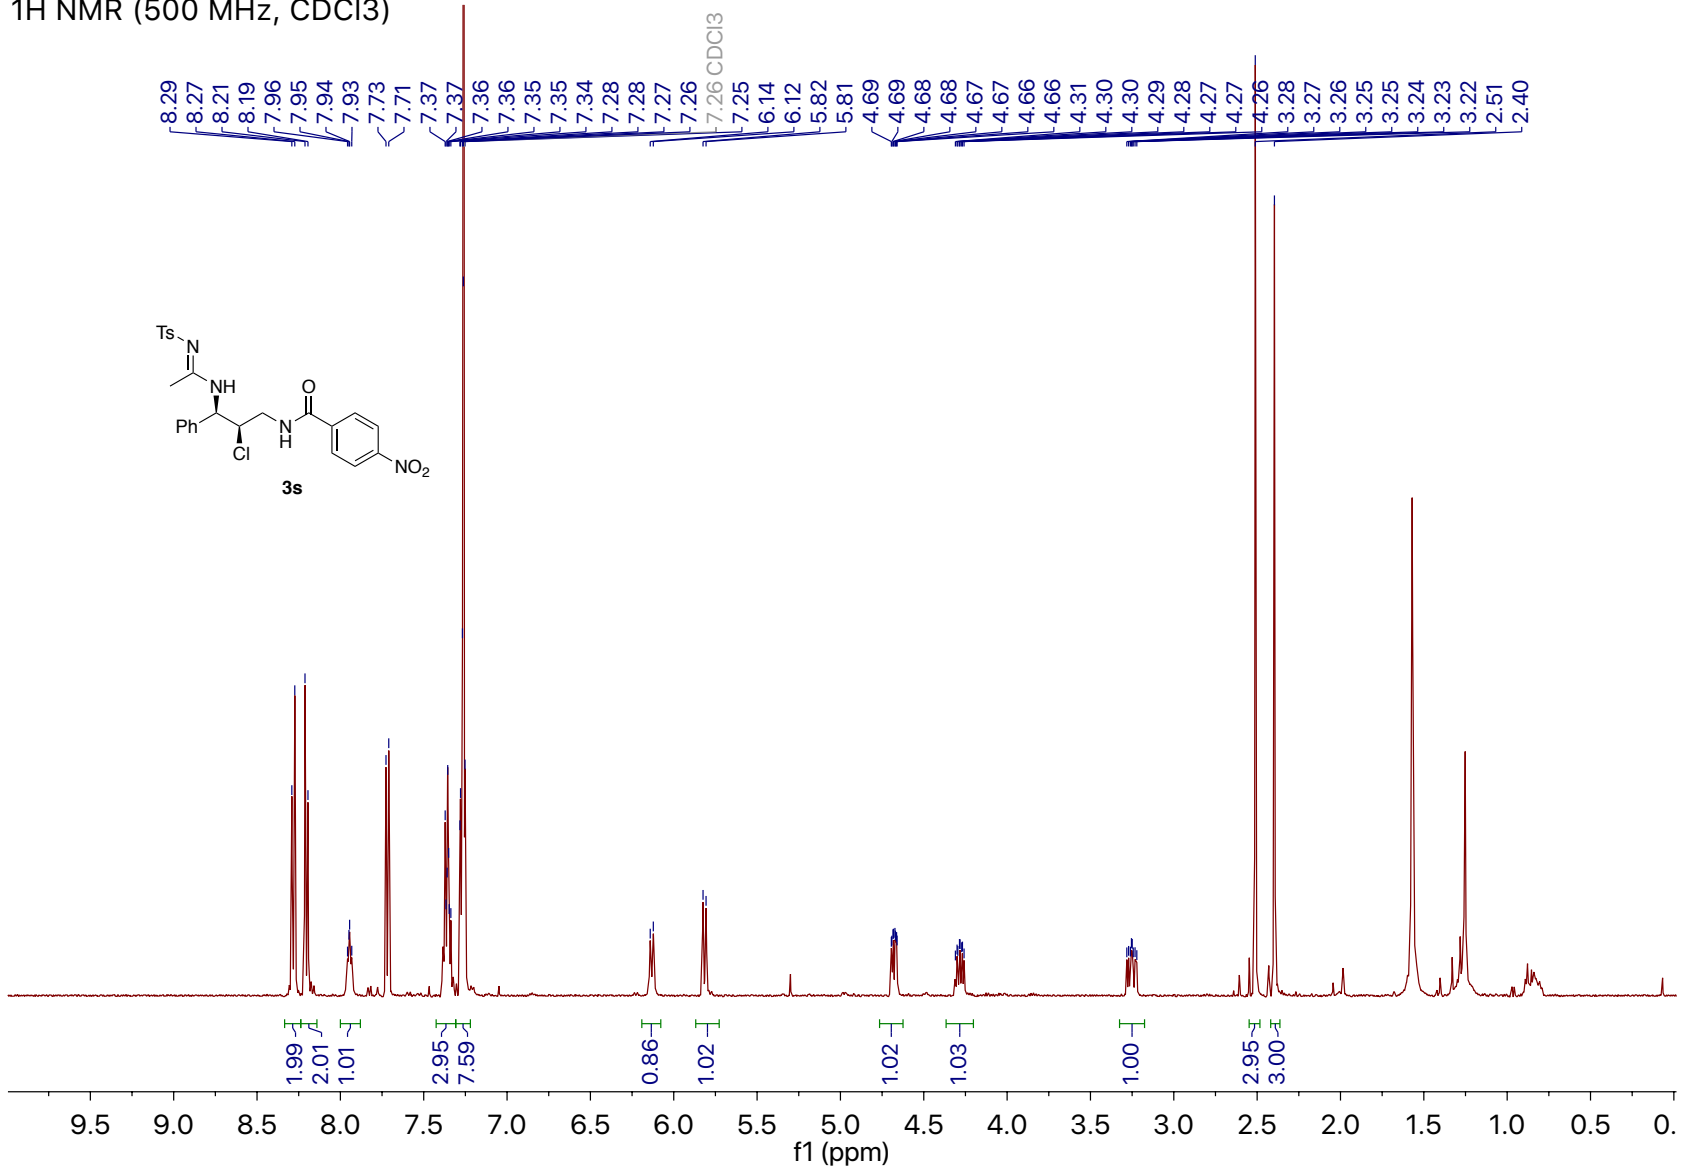



<sup>13</sup>C NMR (126 MHz, CDCl<sub>3</sub>)

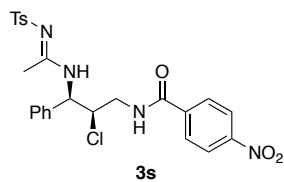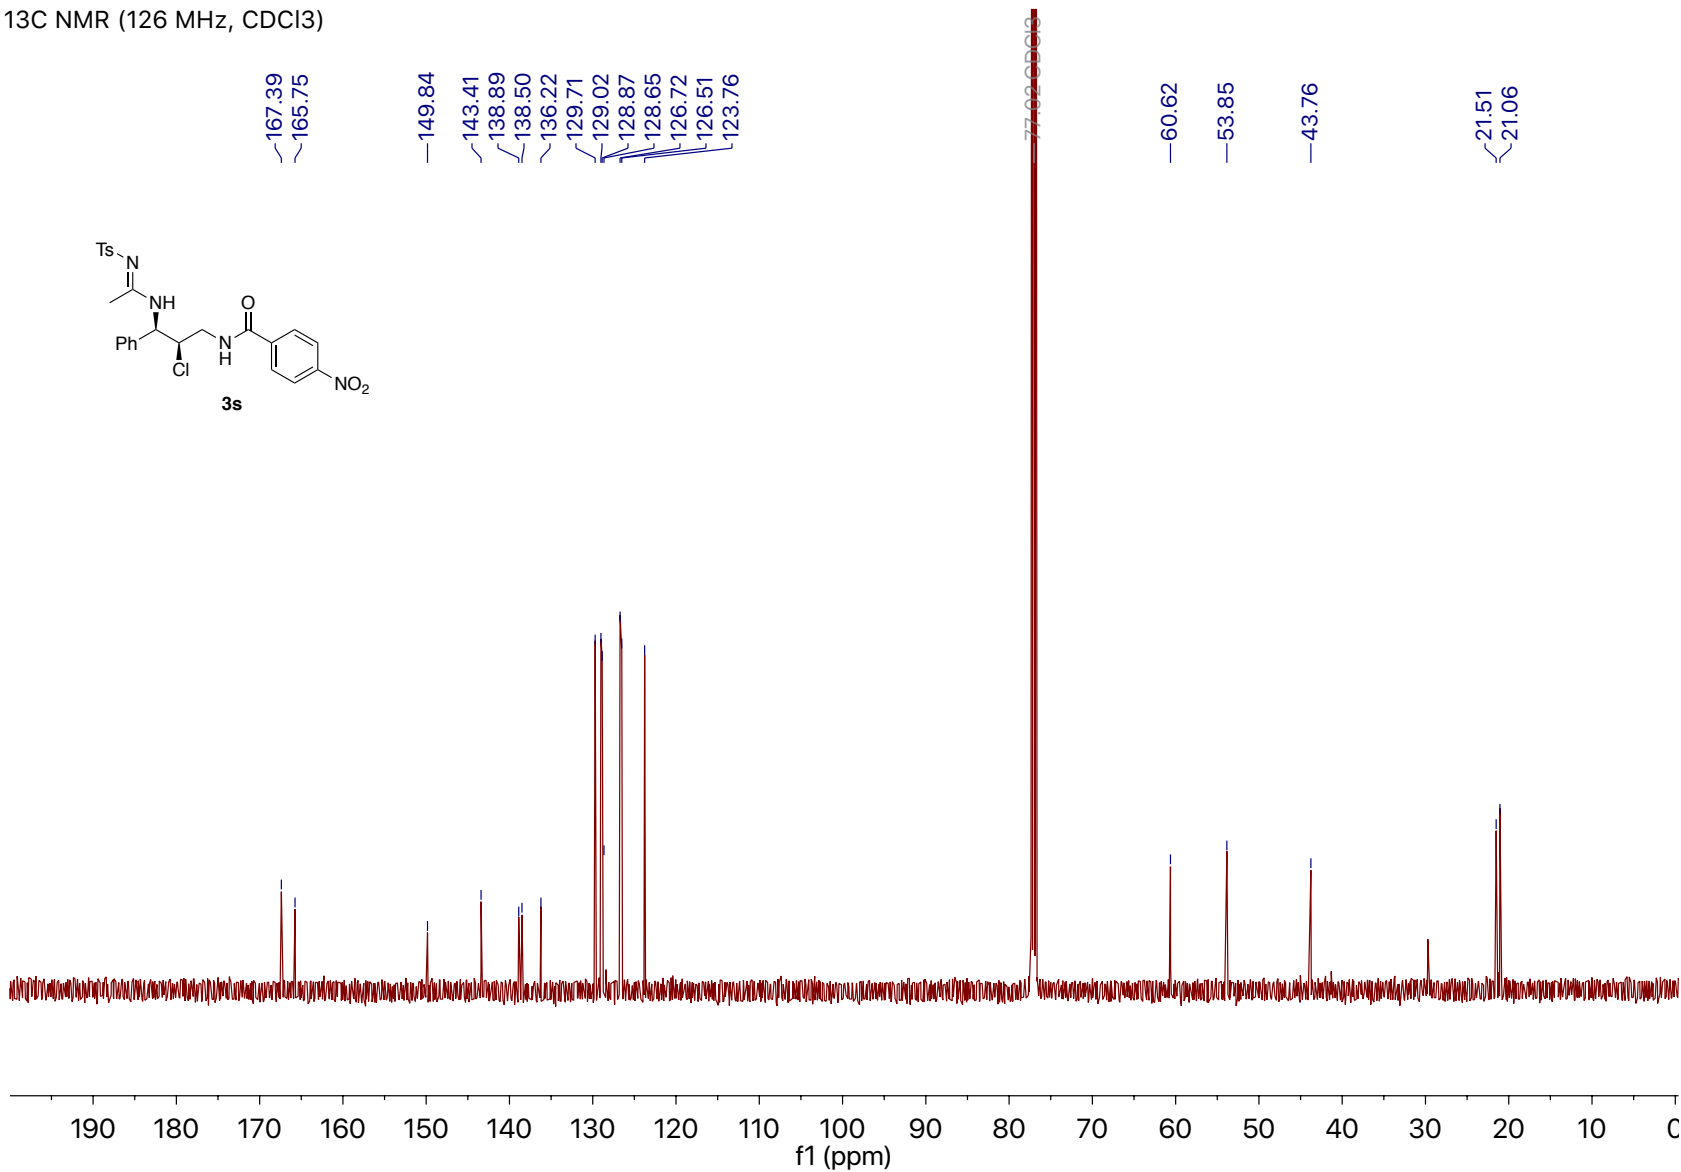

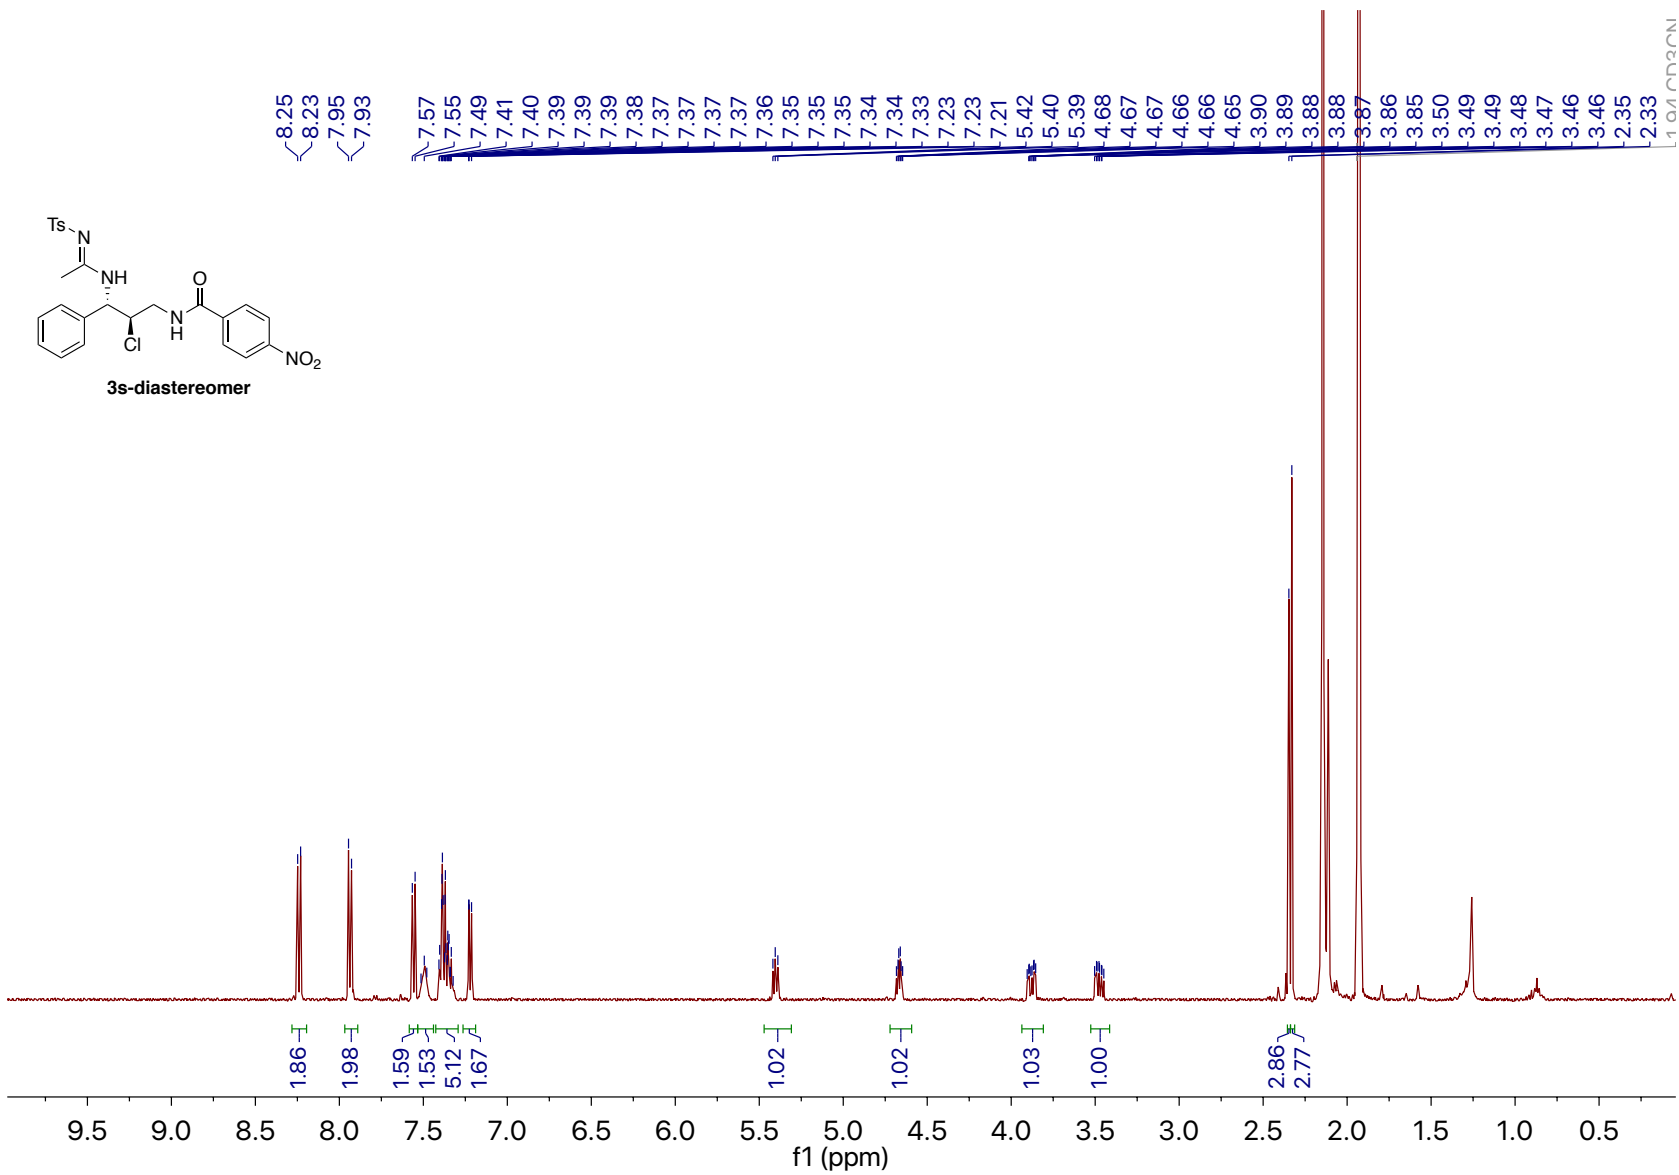

<sup>13</sup>C NMR (126 MHz, CDCl<sub>3</sub>)

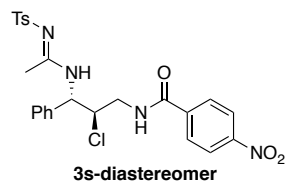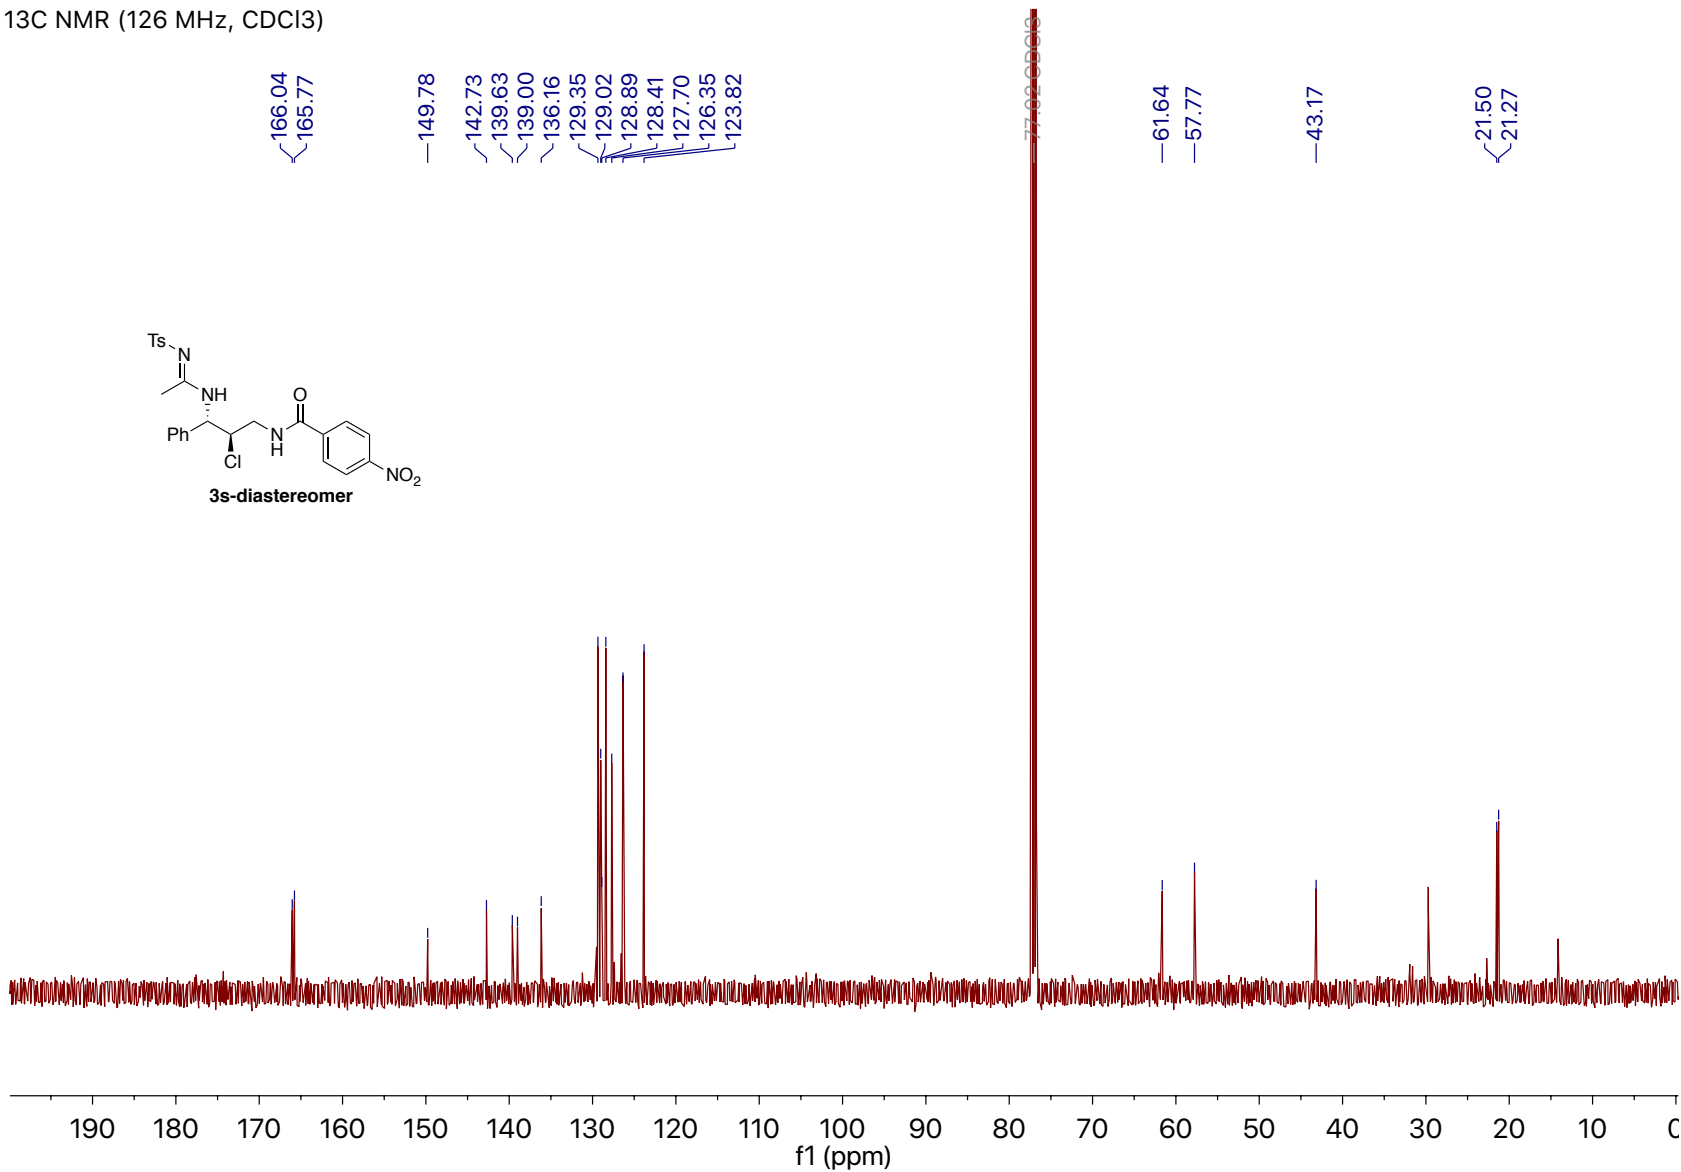

1H NMR (500 MHz, CDCl<sub>3</sub>)

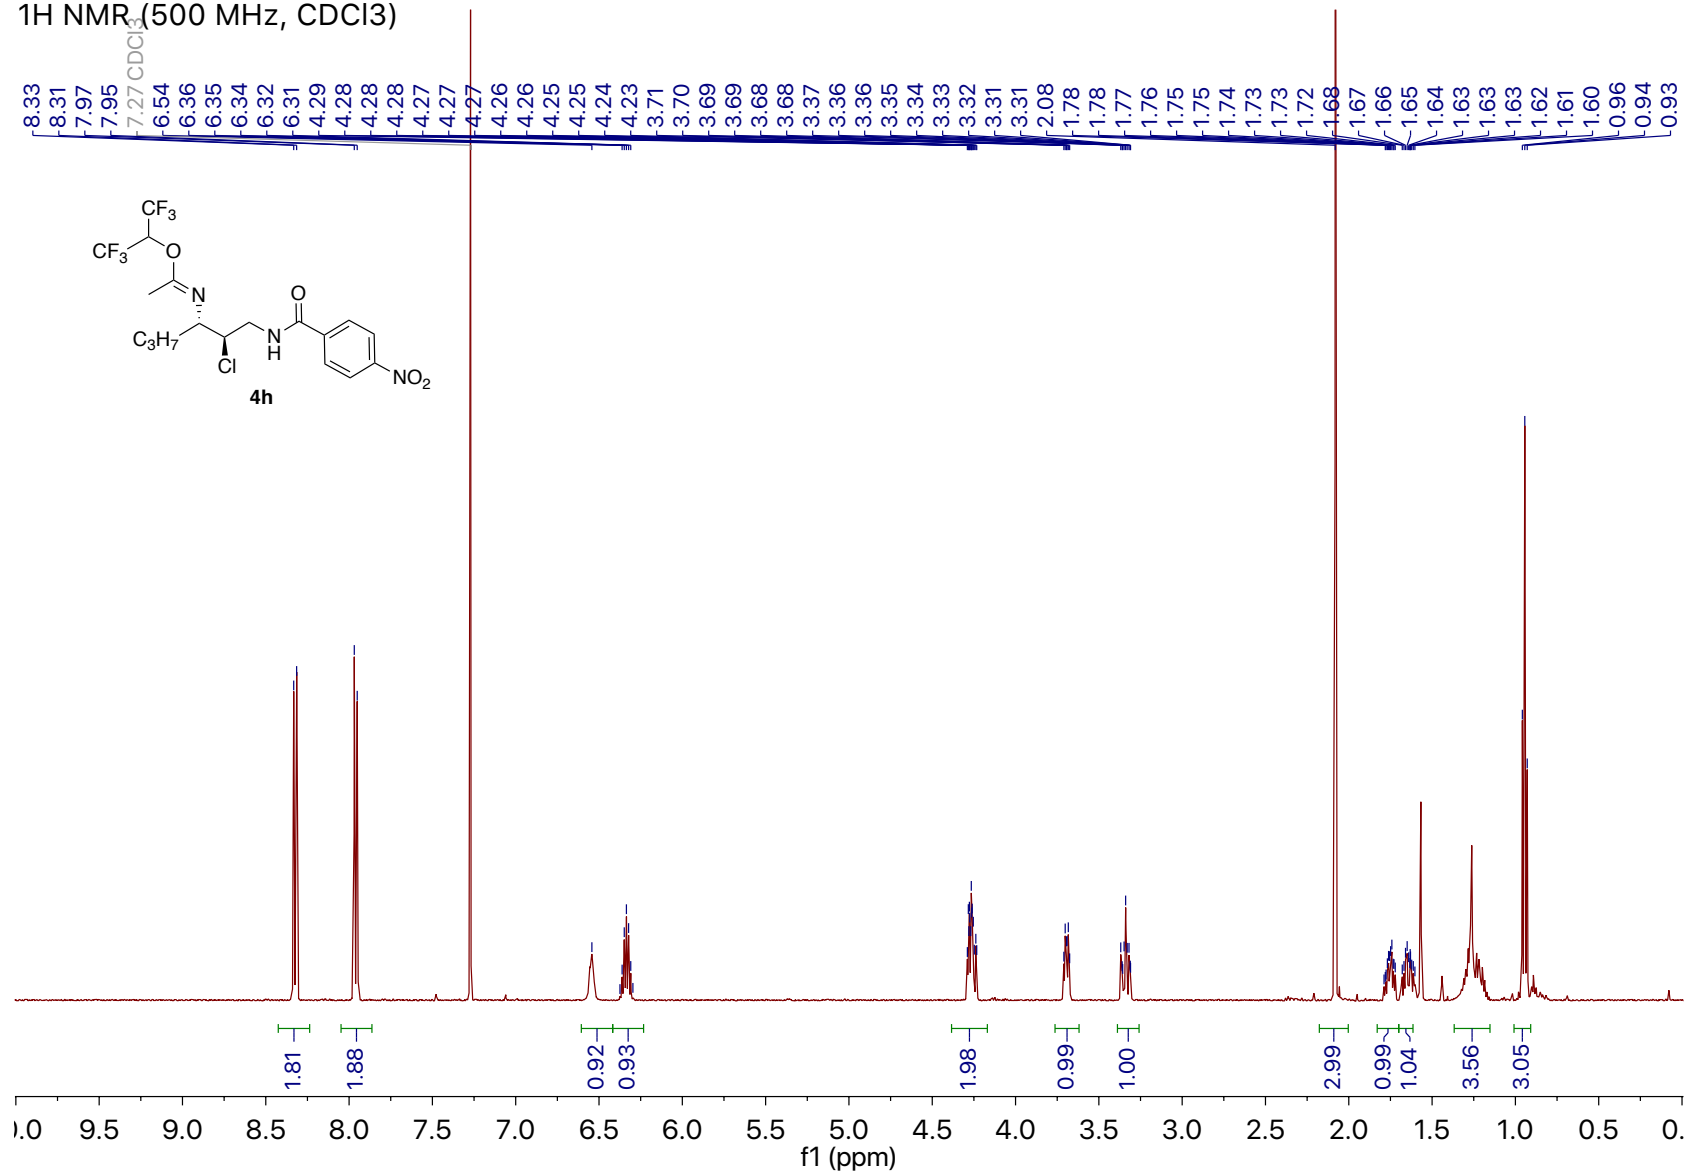

<sup>13</sup>C NMR (126 MHz, CDCl<sub>3</sub>)

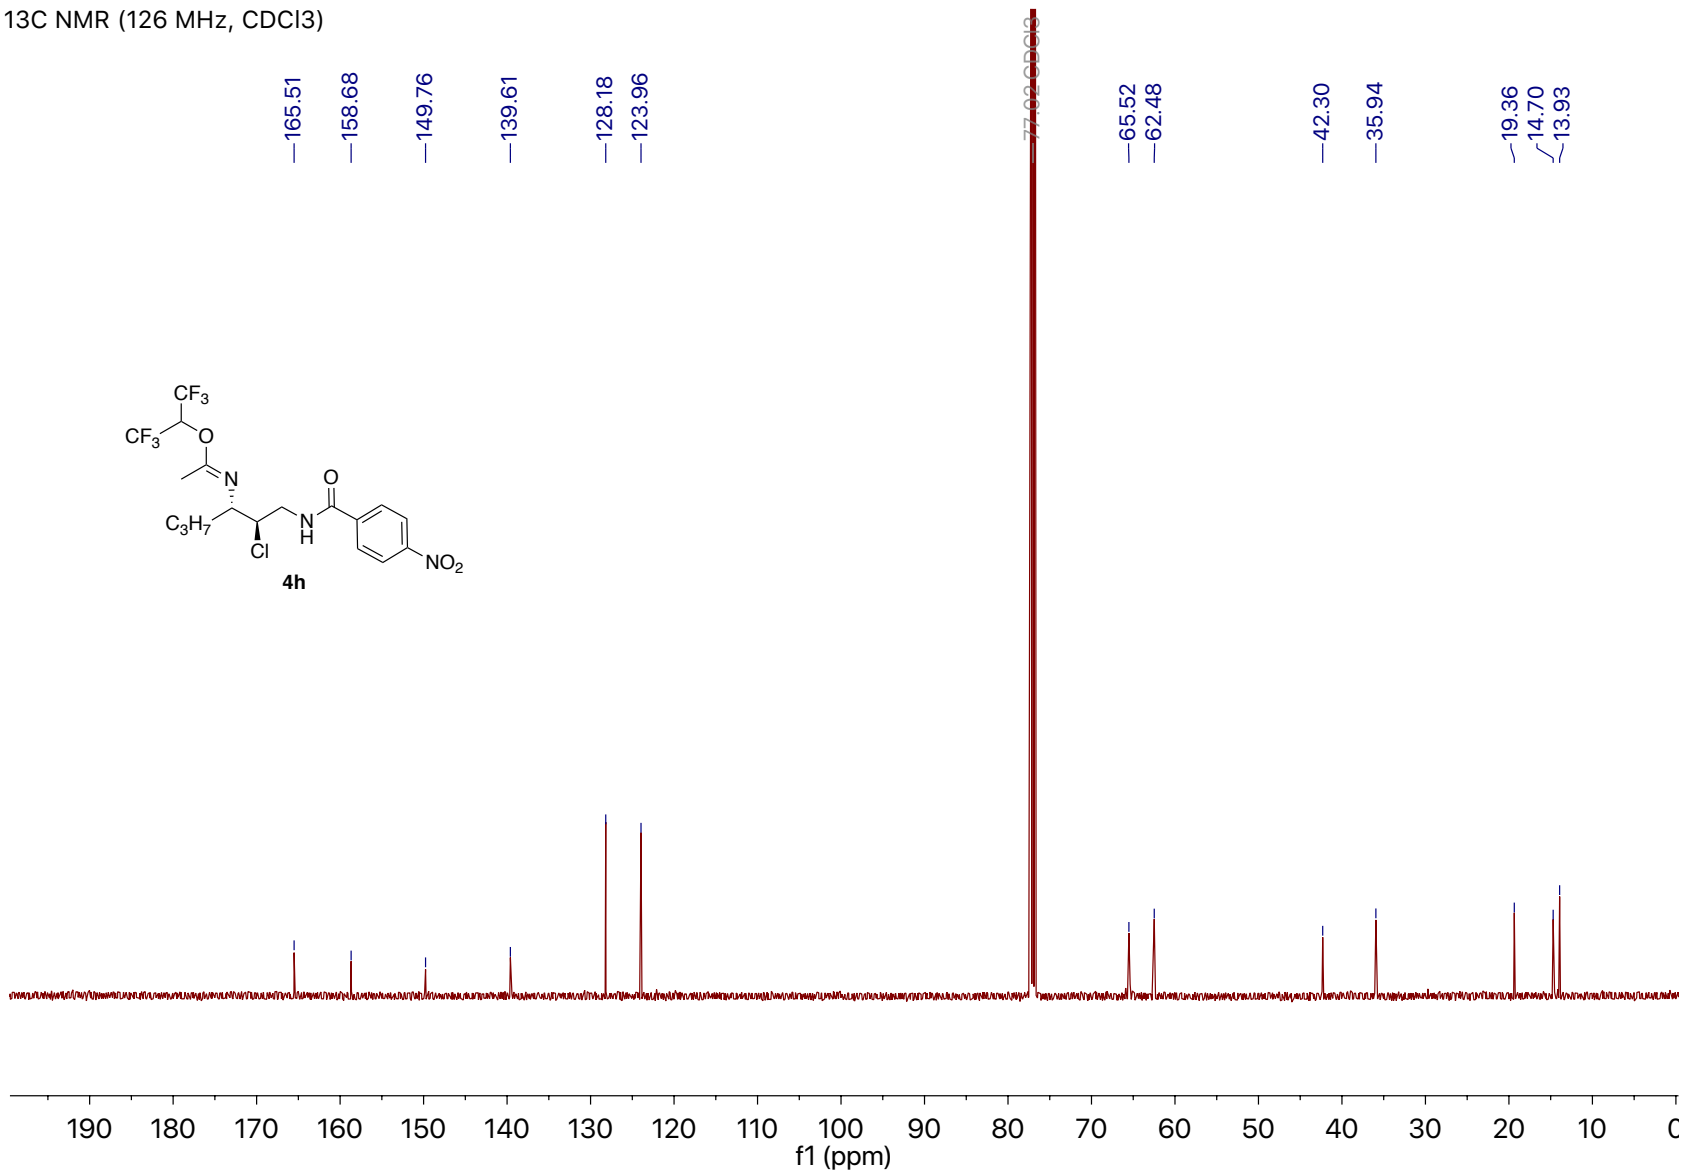

19F NMR (470 MHz, CDCl3)

-73.02  
-73.04  
-73.05  
-73.06  
-73.07  
-73.09  
-73.33  
-73.34  
-73.36  
-73.36  
-73.38  
-73.39

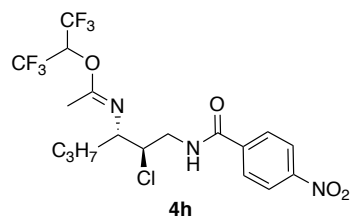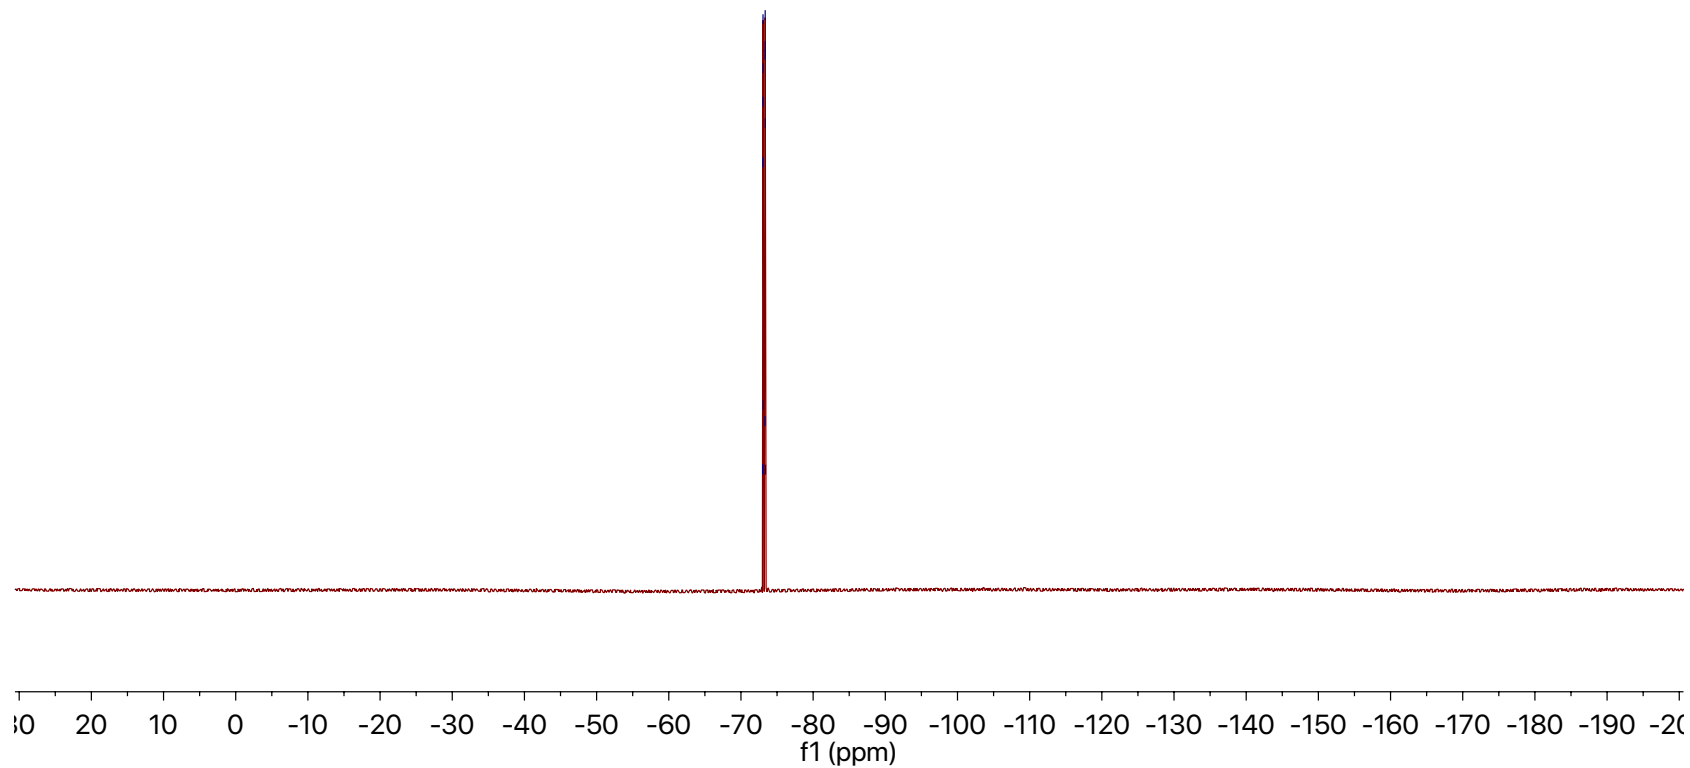

1H NMR (500 MHz, CDCl3)

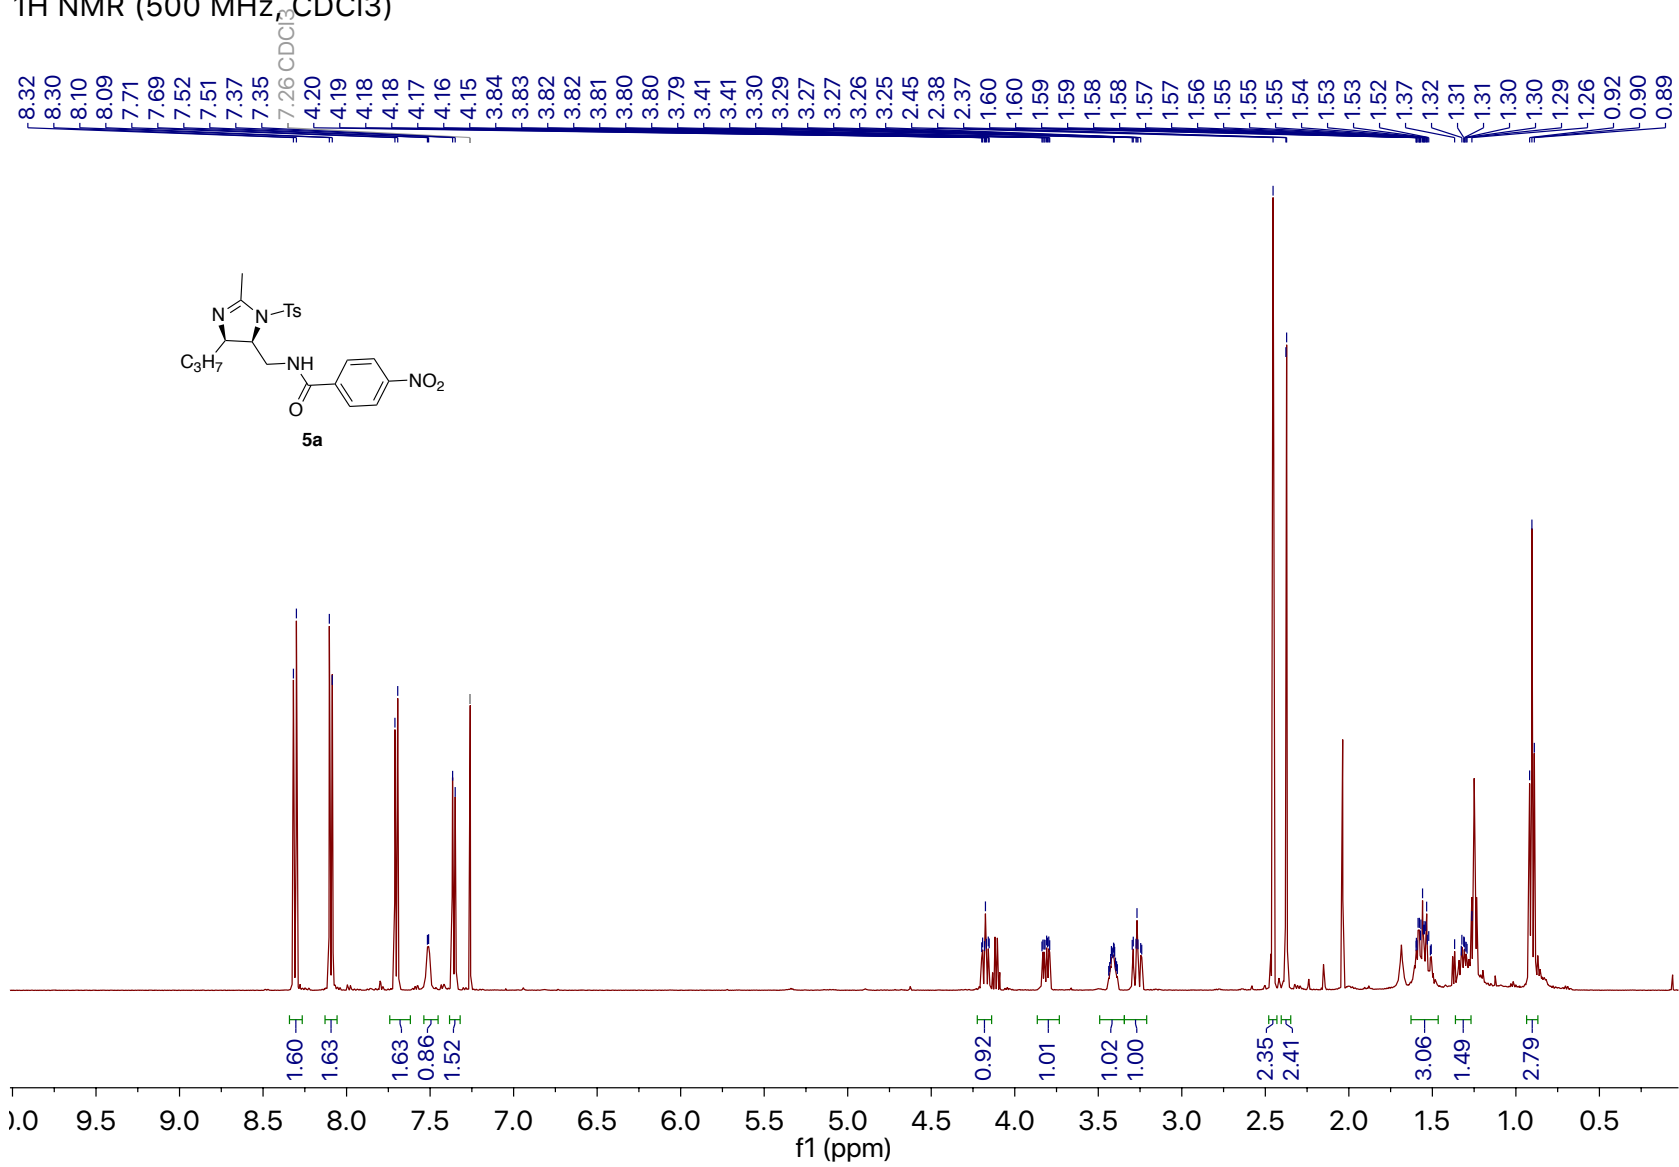

<sup>13</sup>C NMR (126 MHz, CDCl<sub>3</sub>)

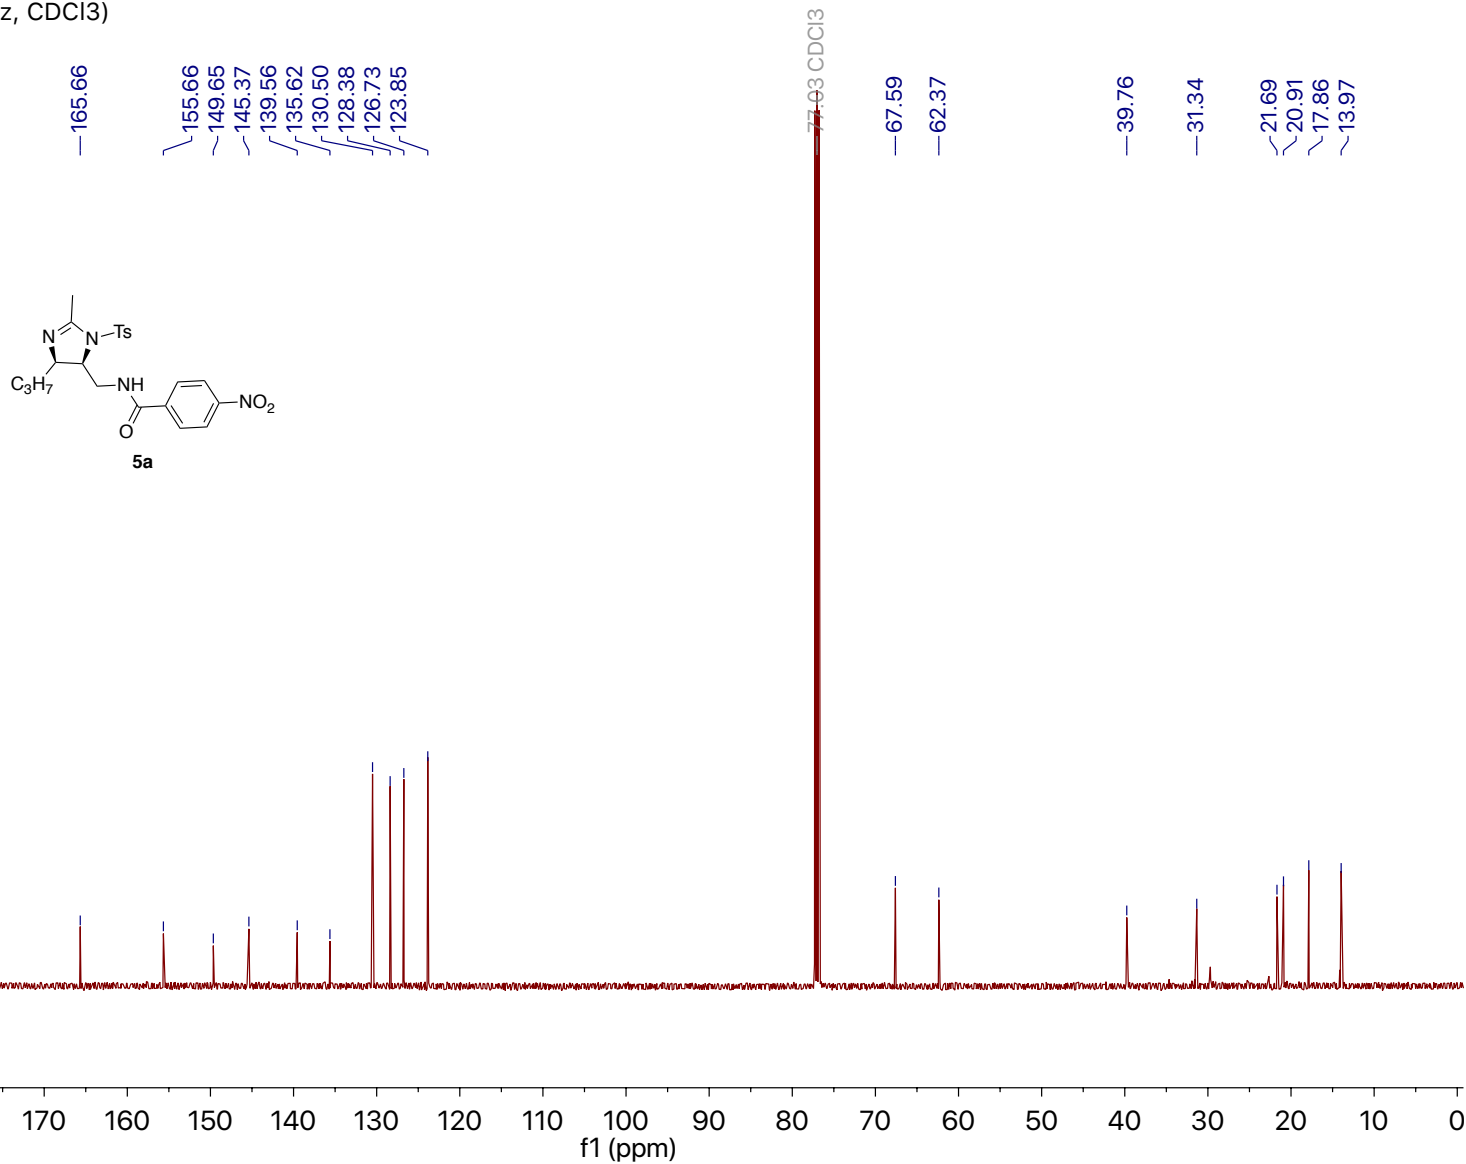



1H NMR (500 MHz, CDCl3)

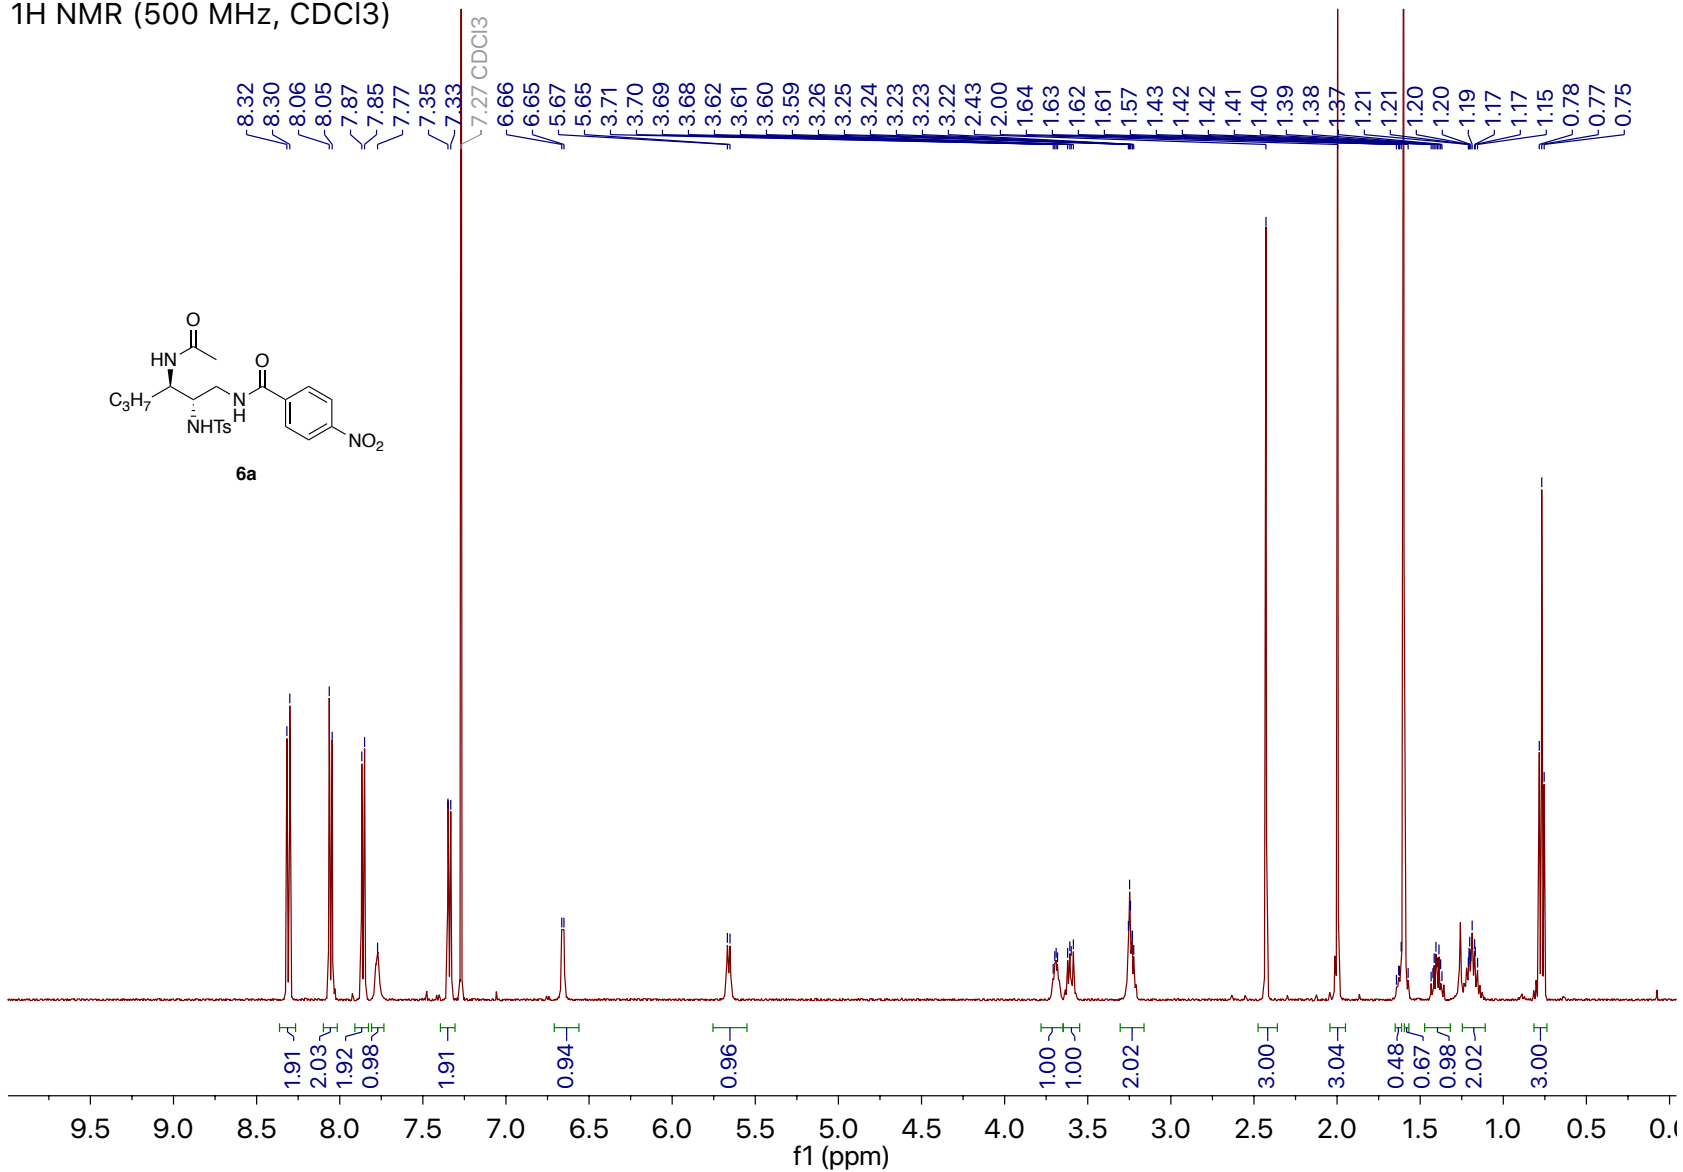

13C NMR (126 MHz, CDCl3)

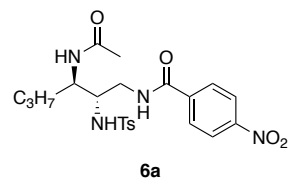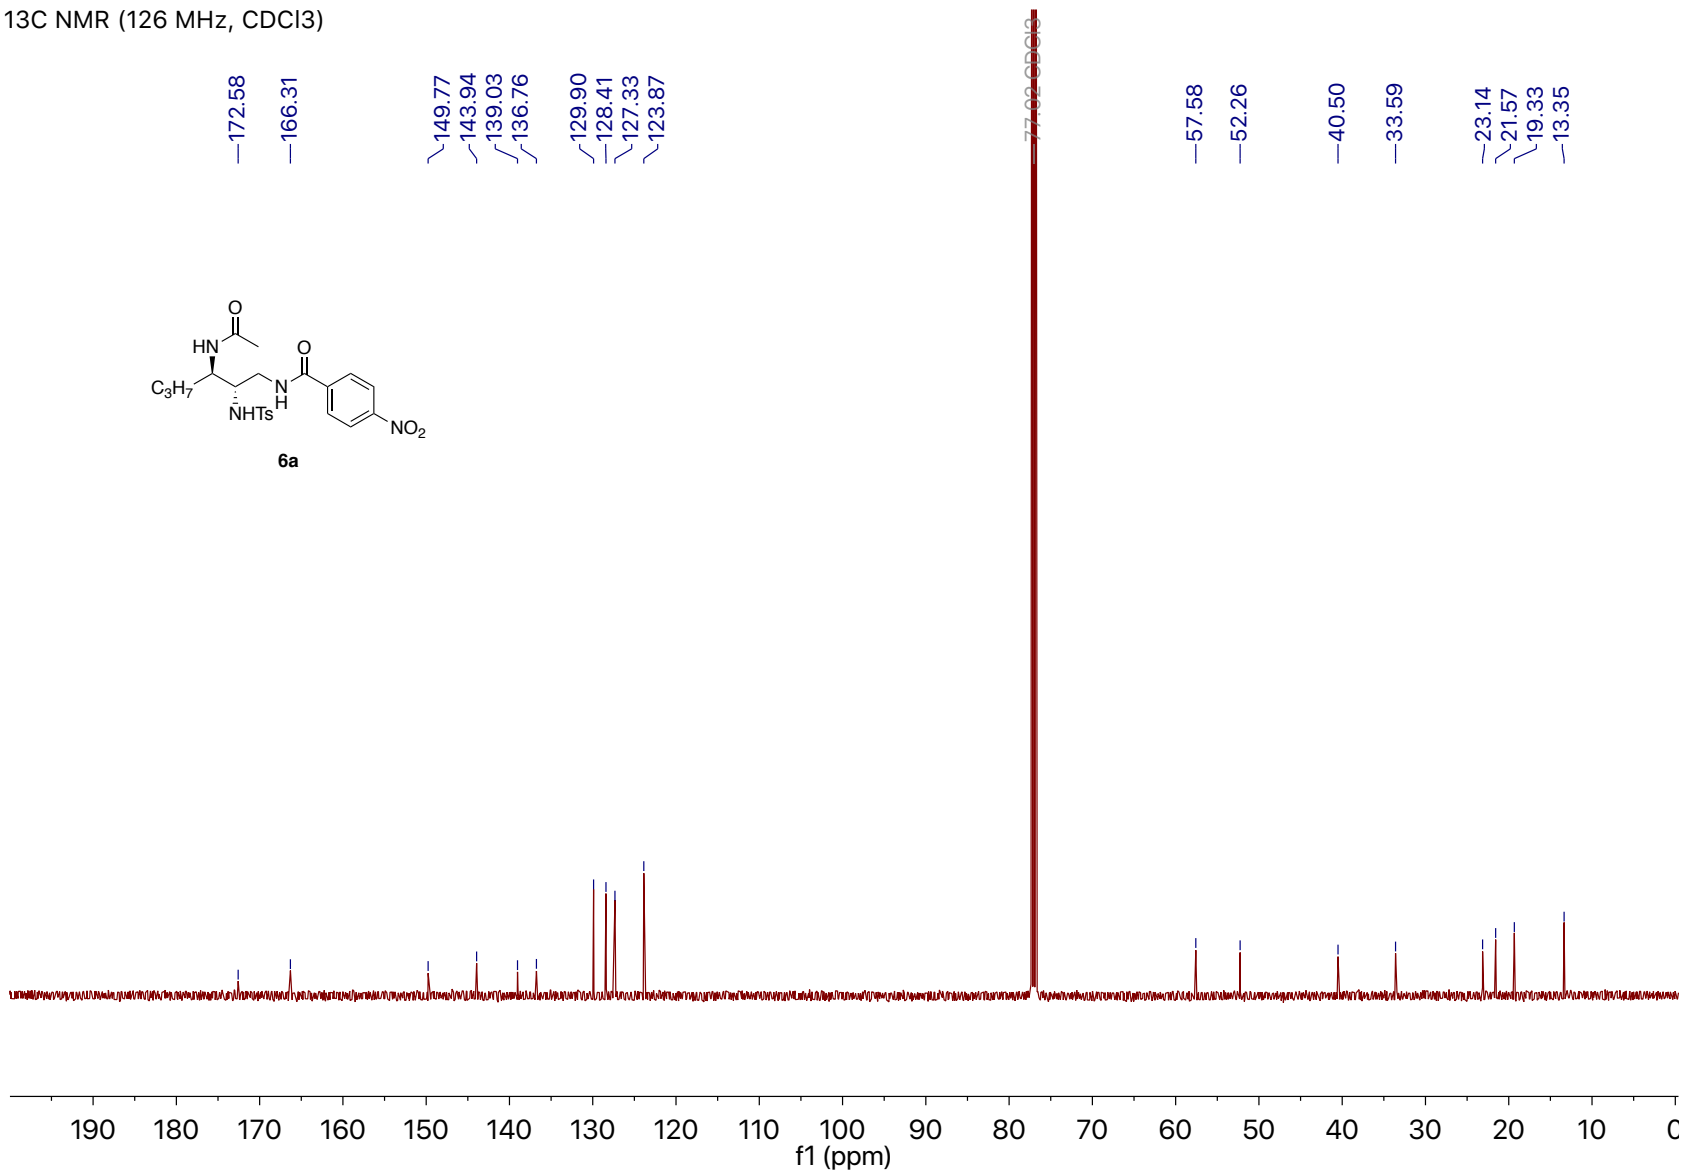

1H NMR (500 MHz, CDCl3)

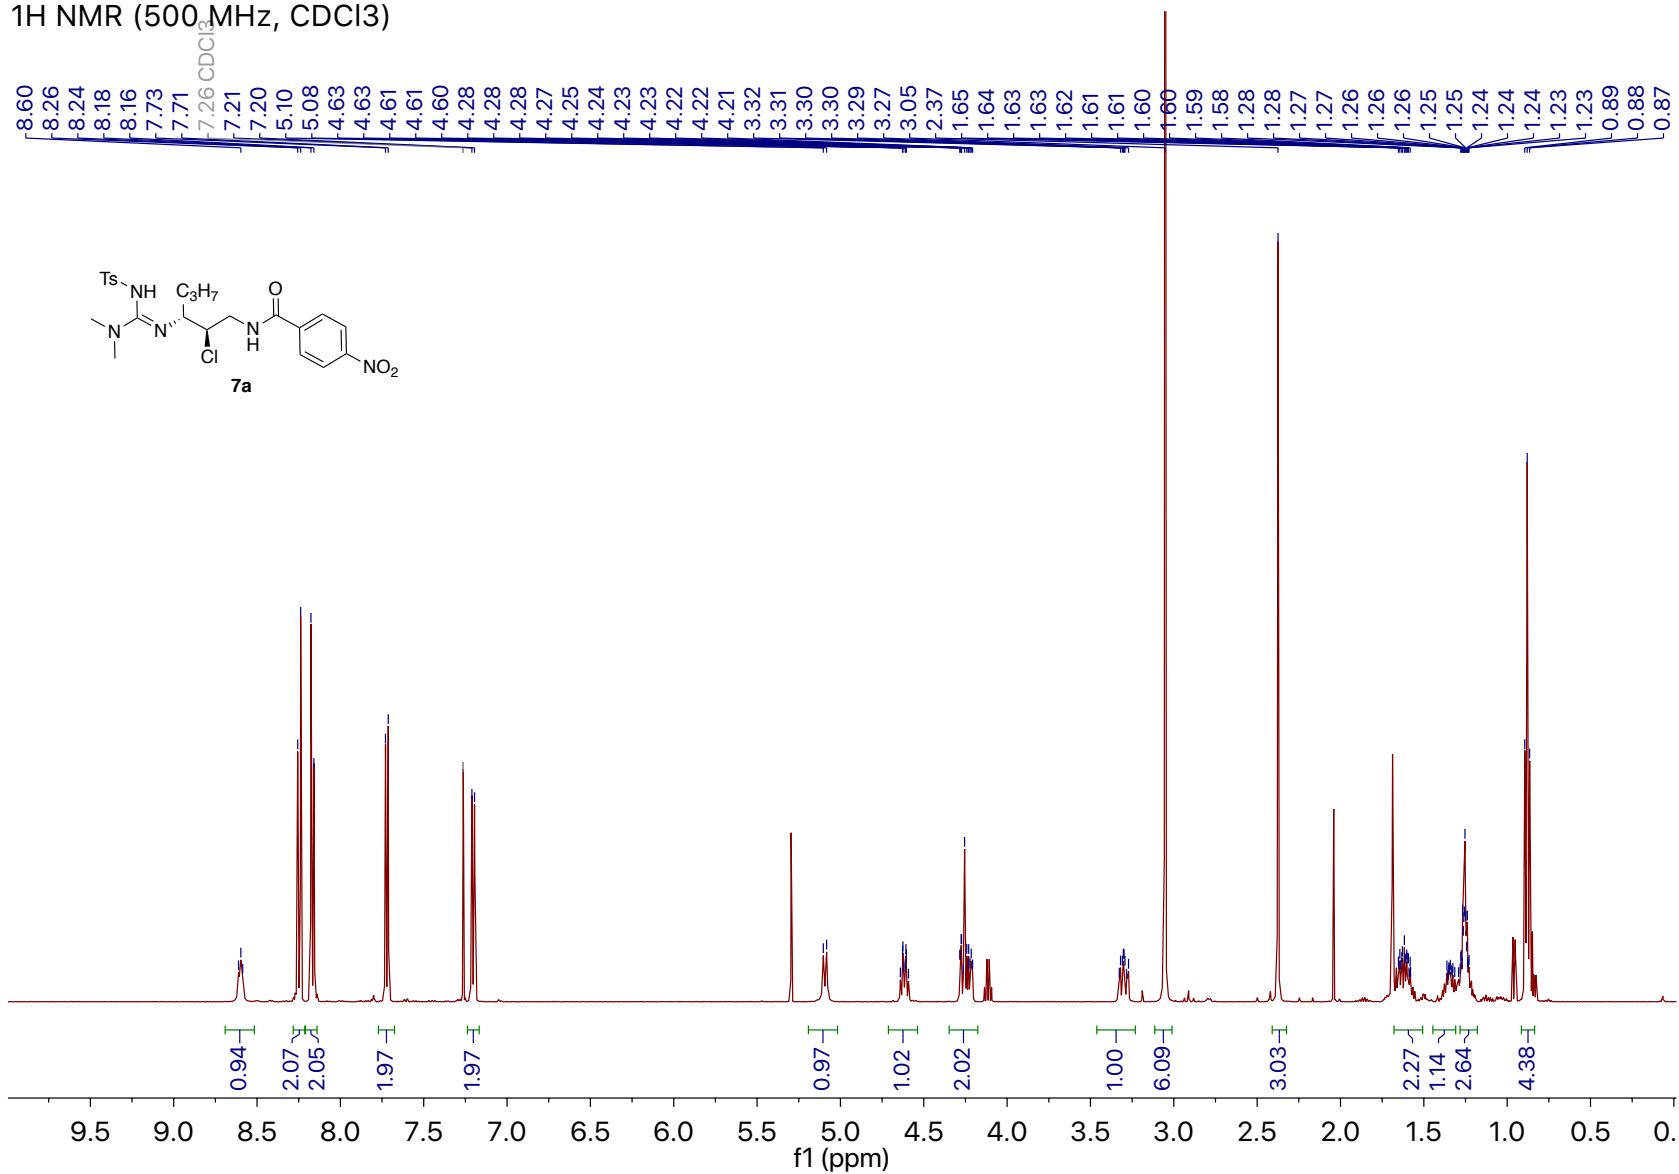

<sup>13</sup>C NMR (126 MHz, CDCl<sub>3</sub>)

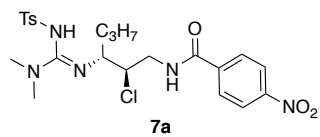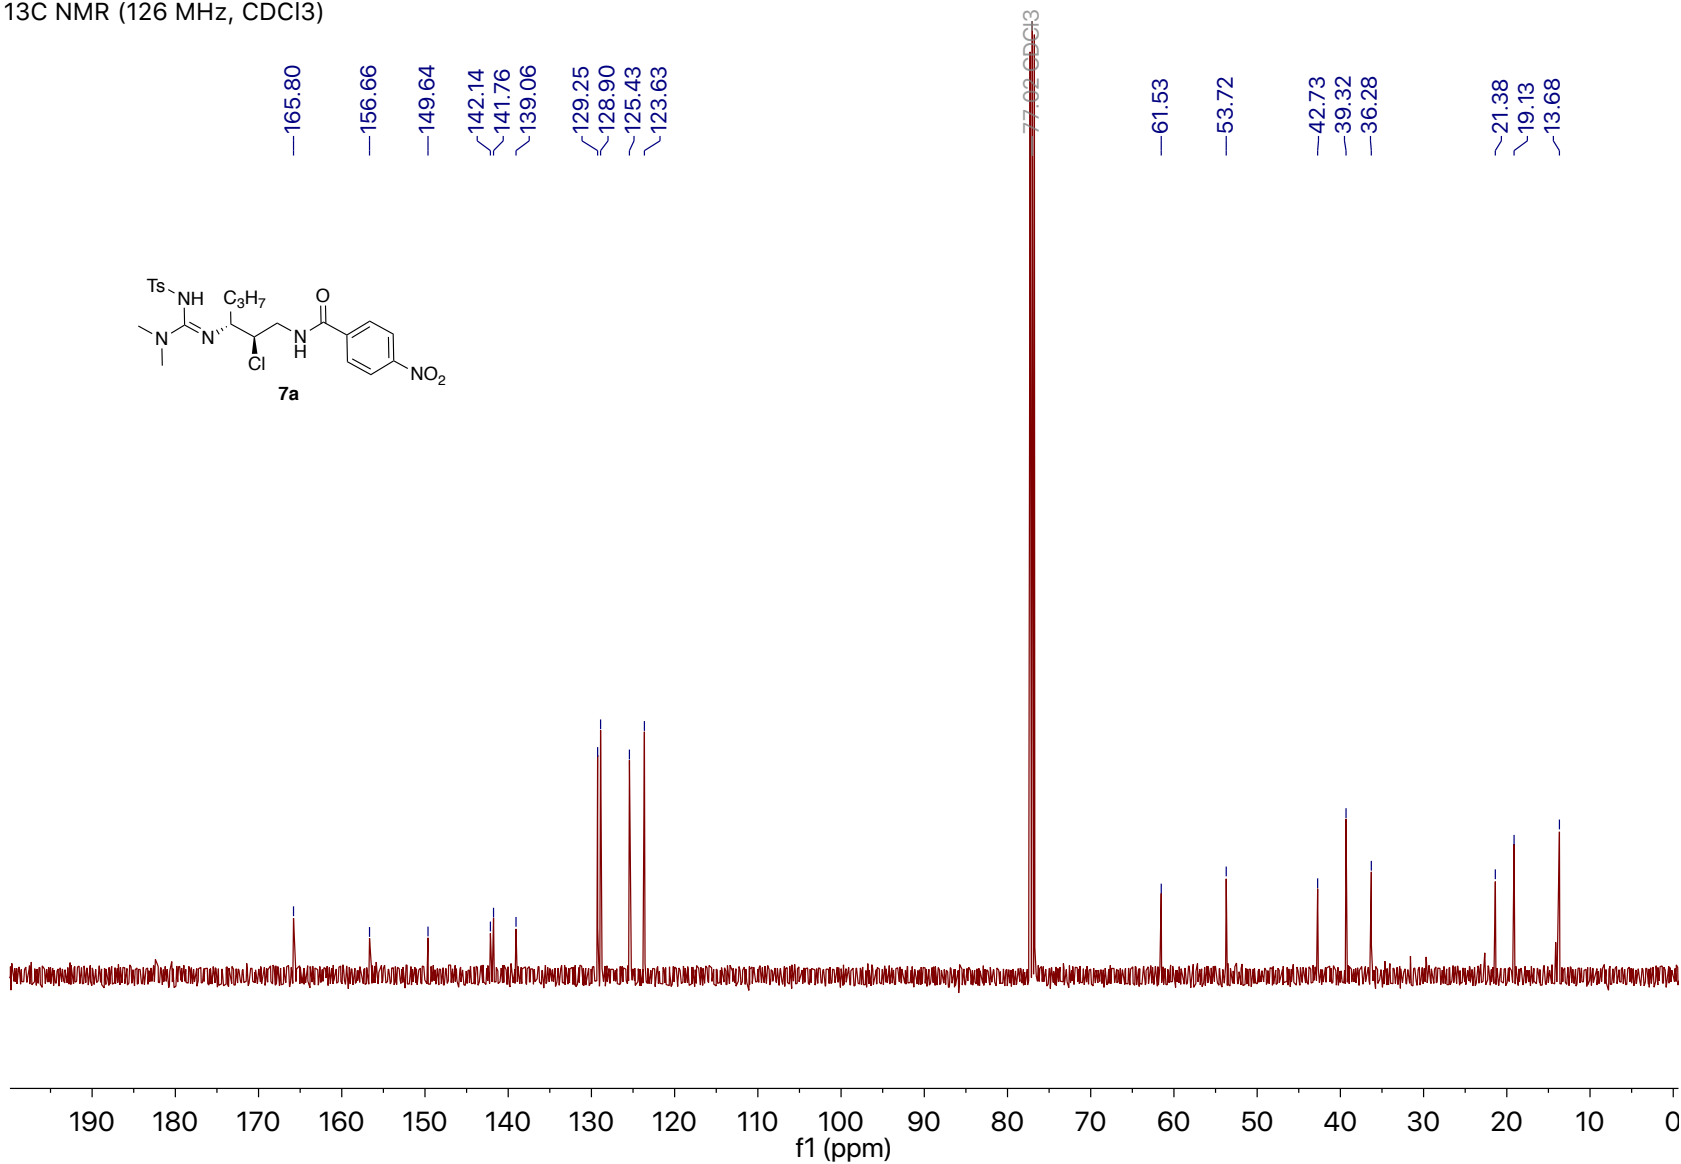

1H NMR (500 MHz, CDCl3)

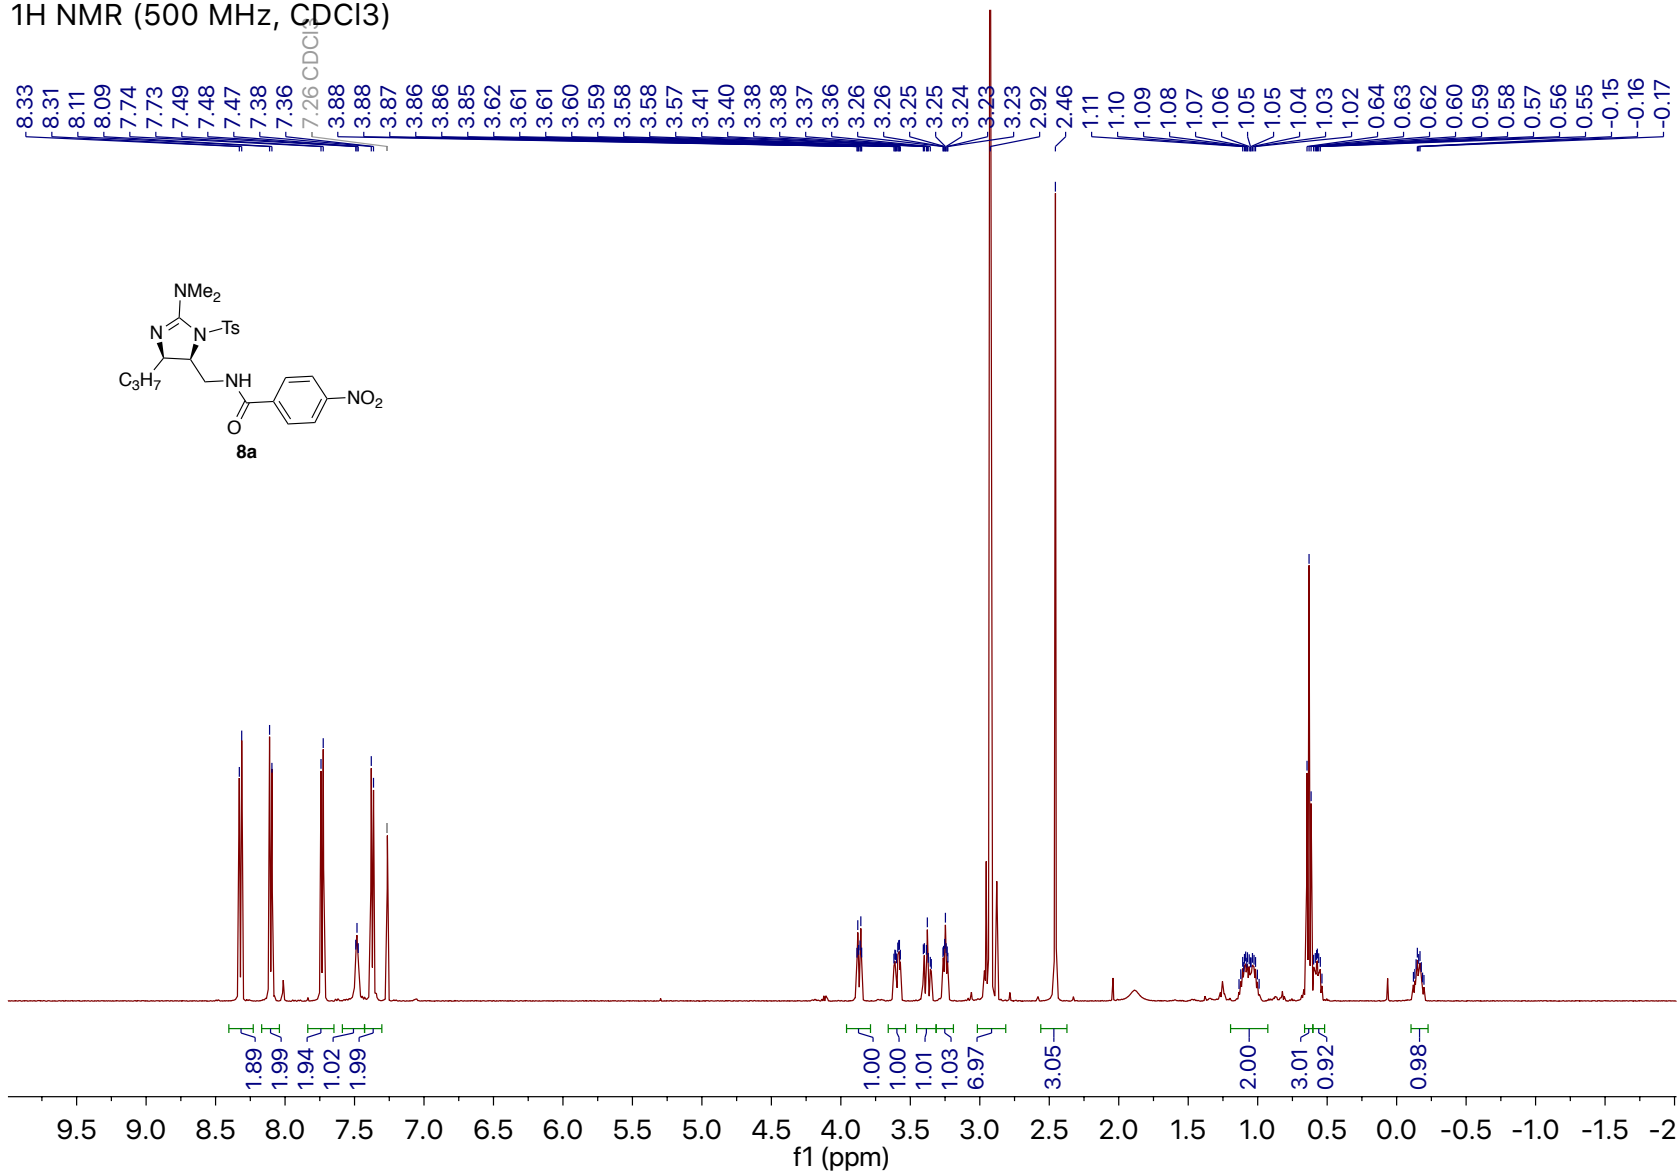

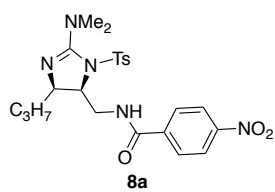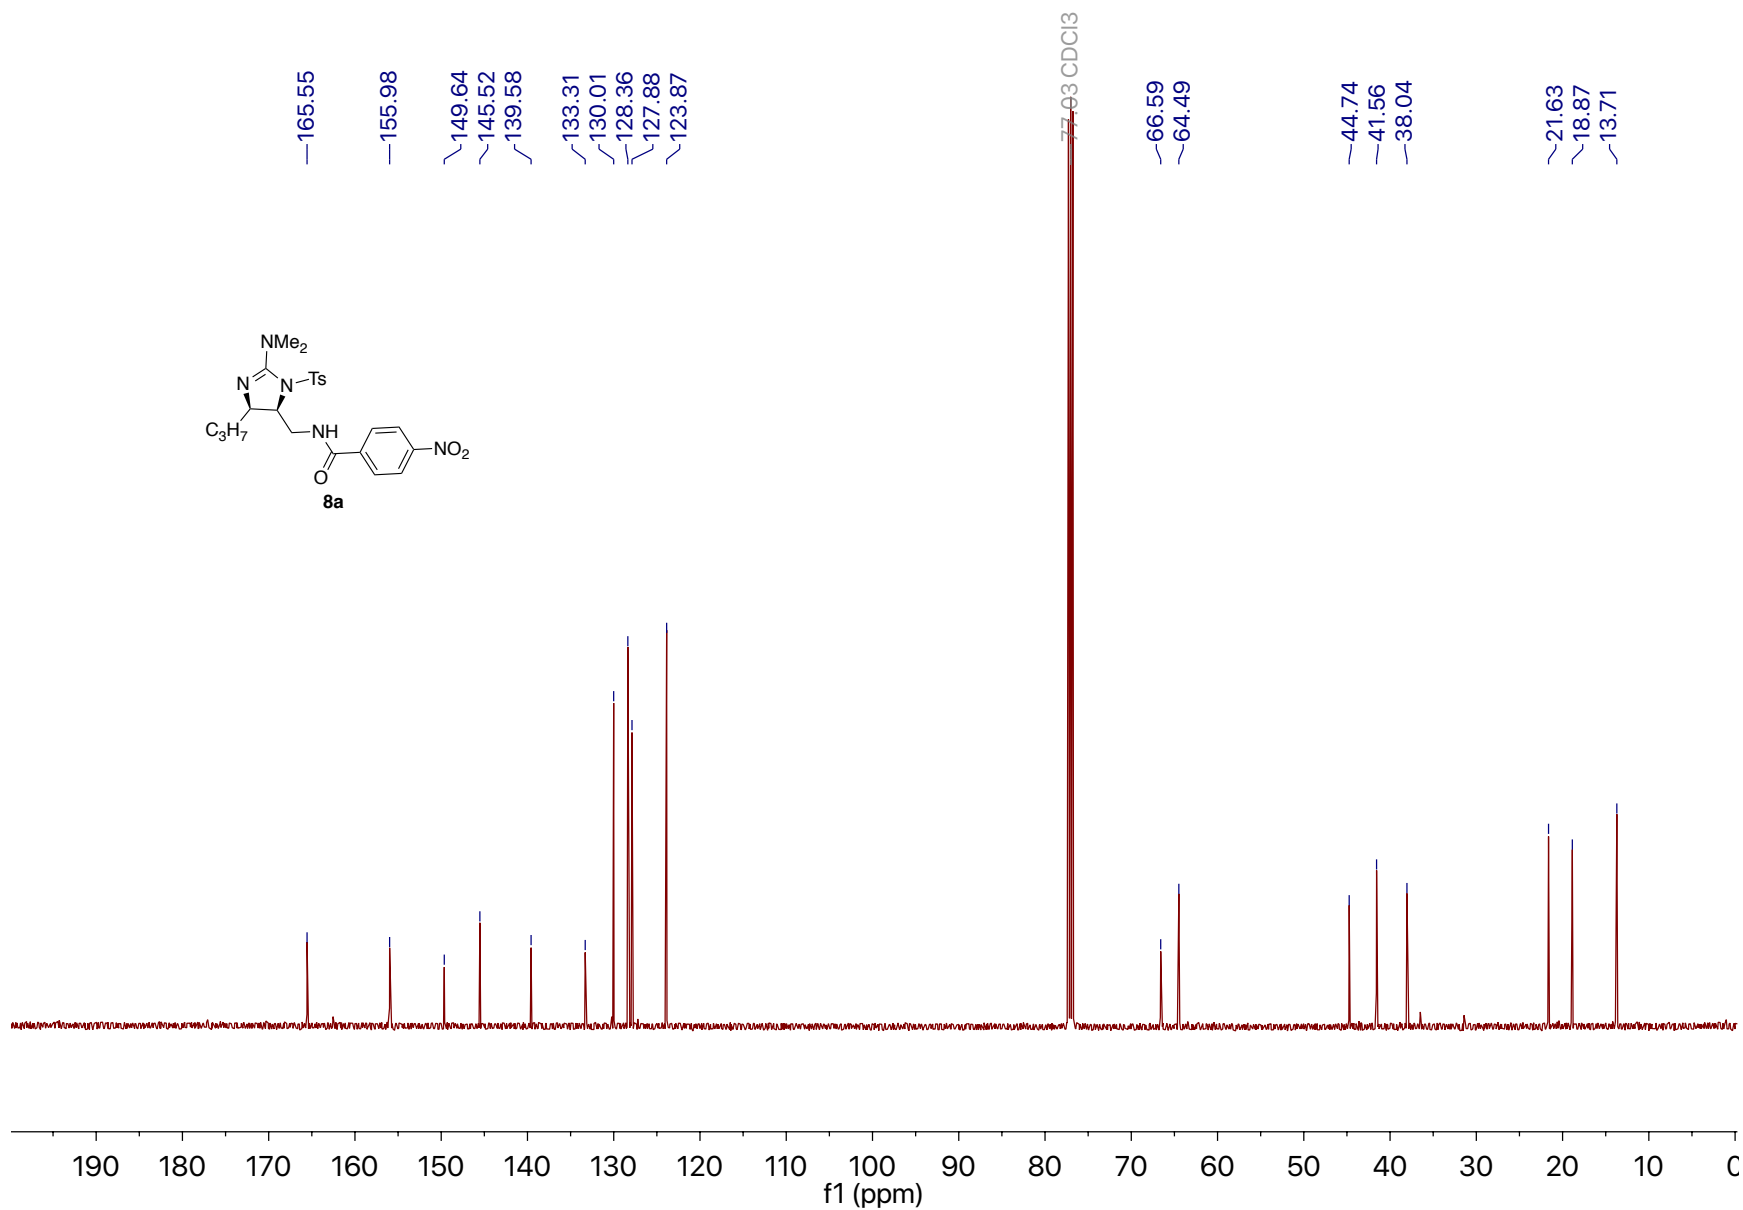

1H NMR (500 MHz, CDCl<sub>3</sub>)

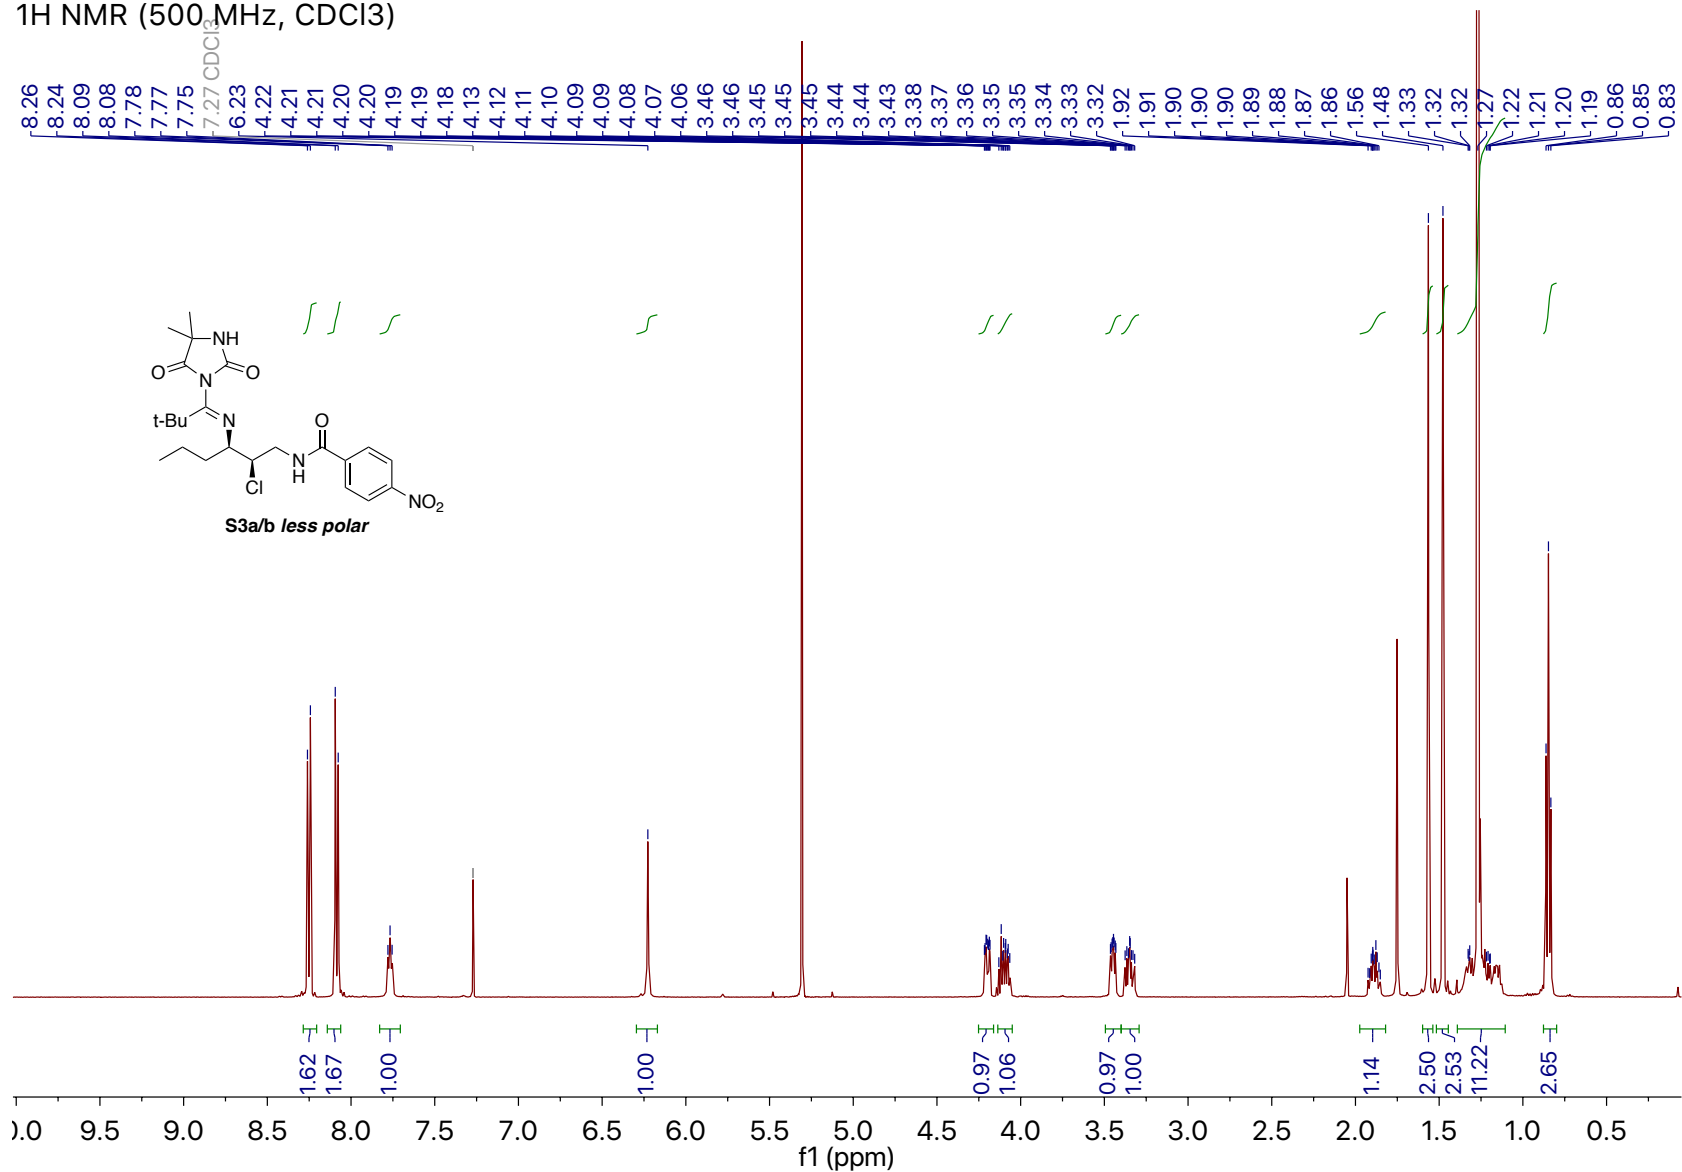

13C NMR (125 MHz, CDCl3)

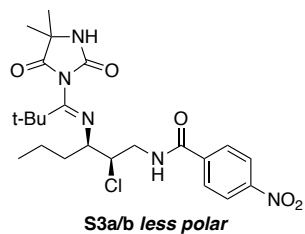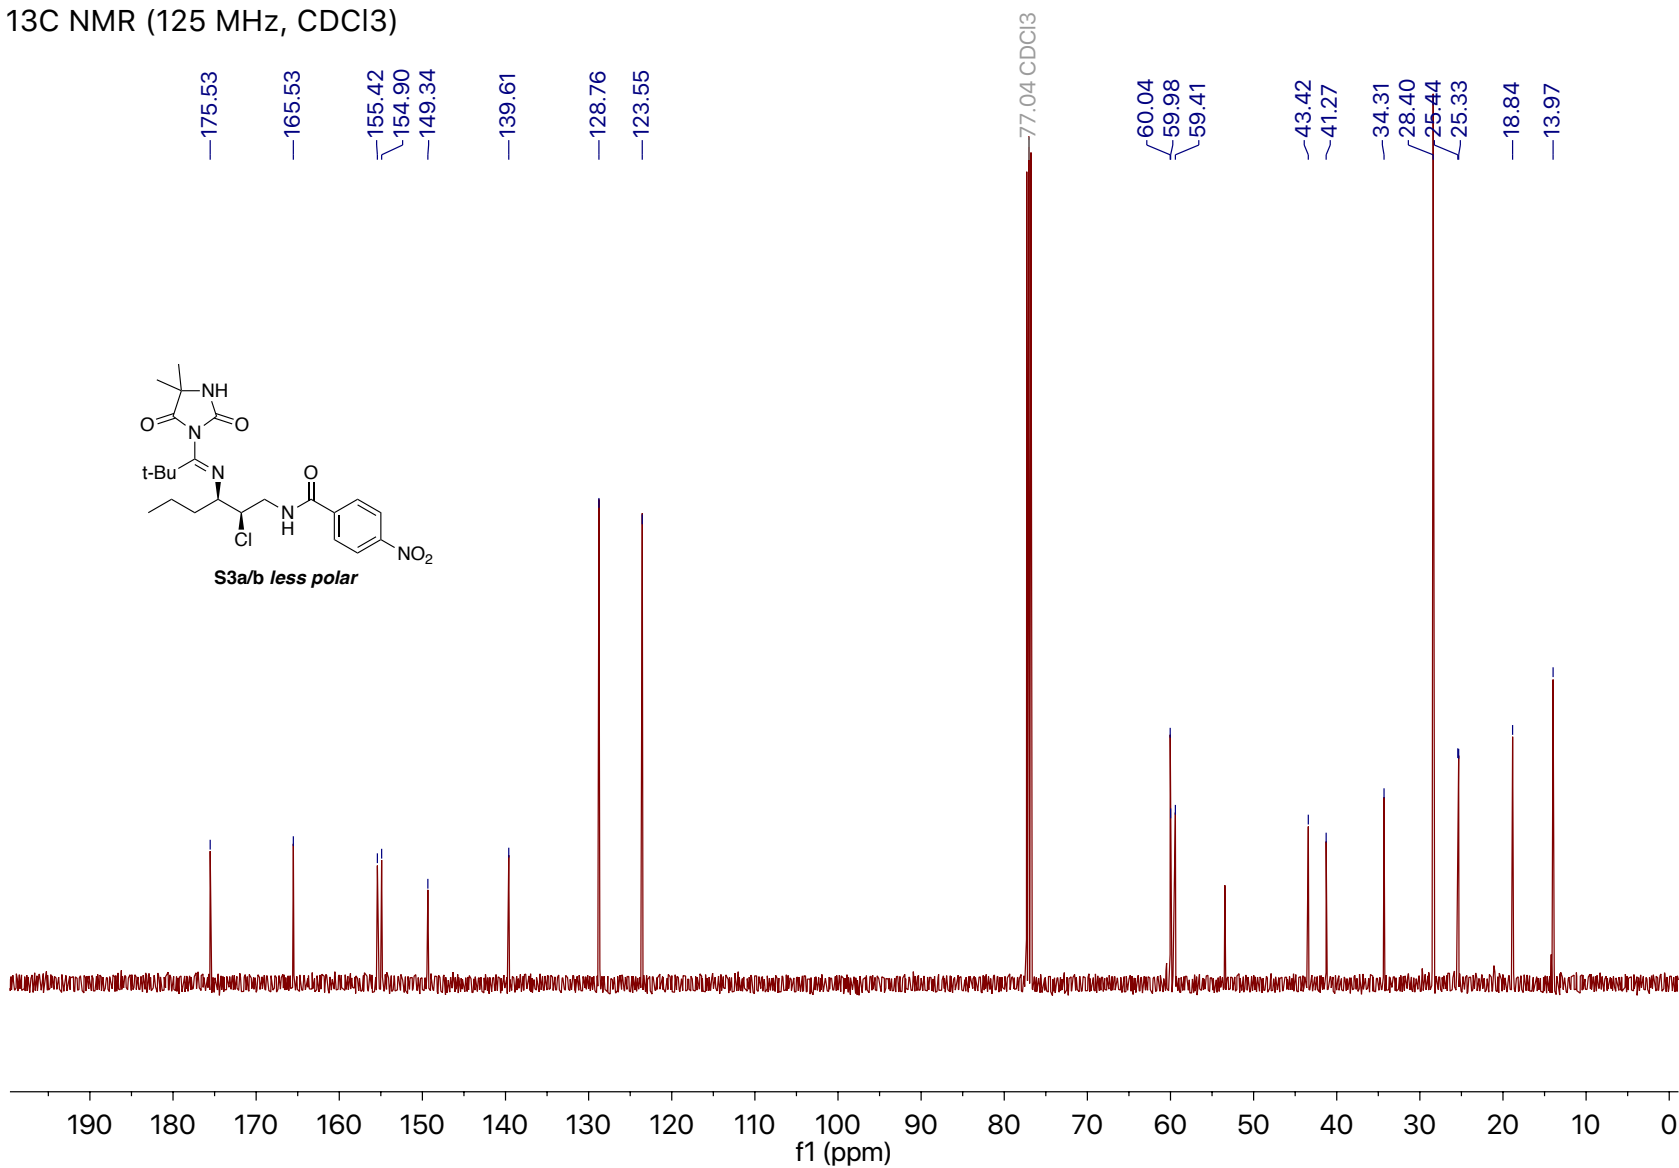



COSY

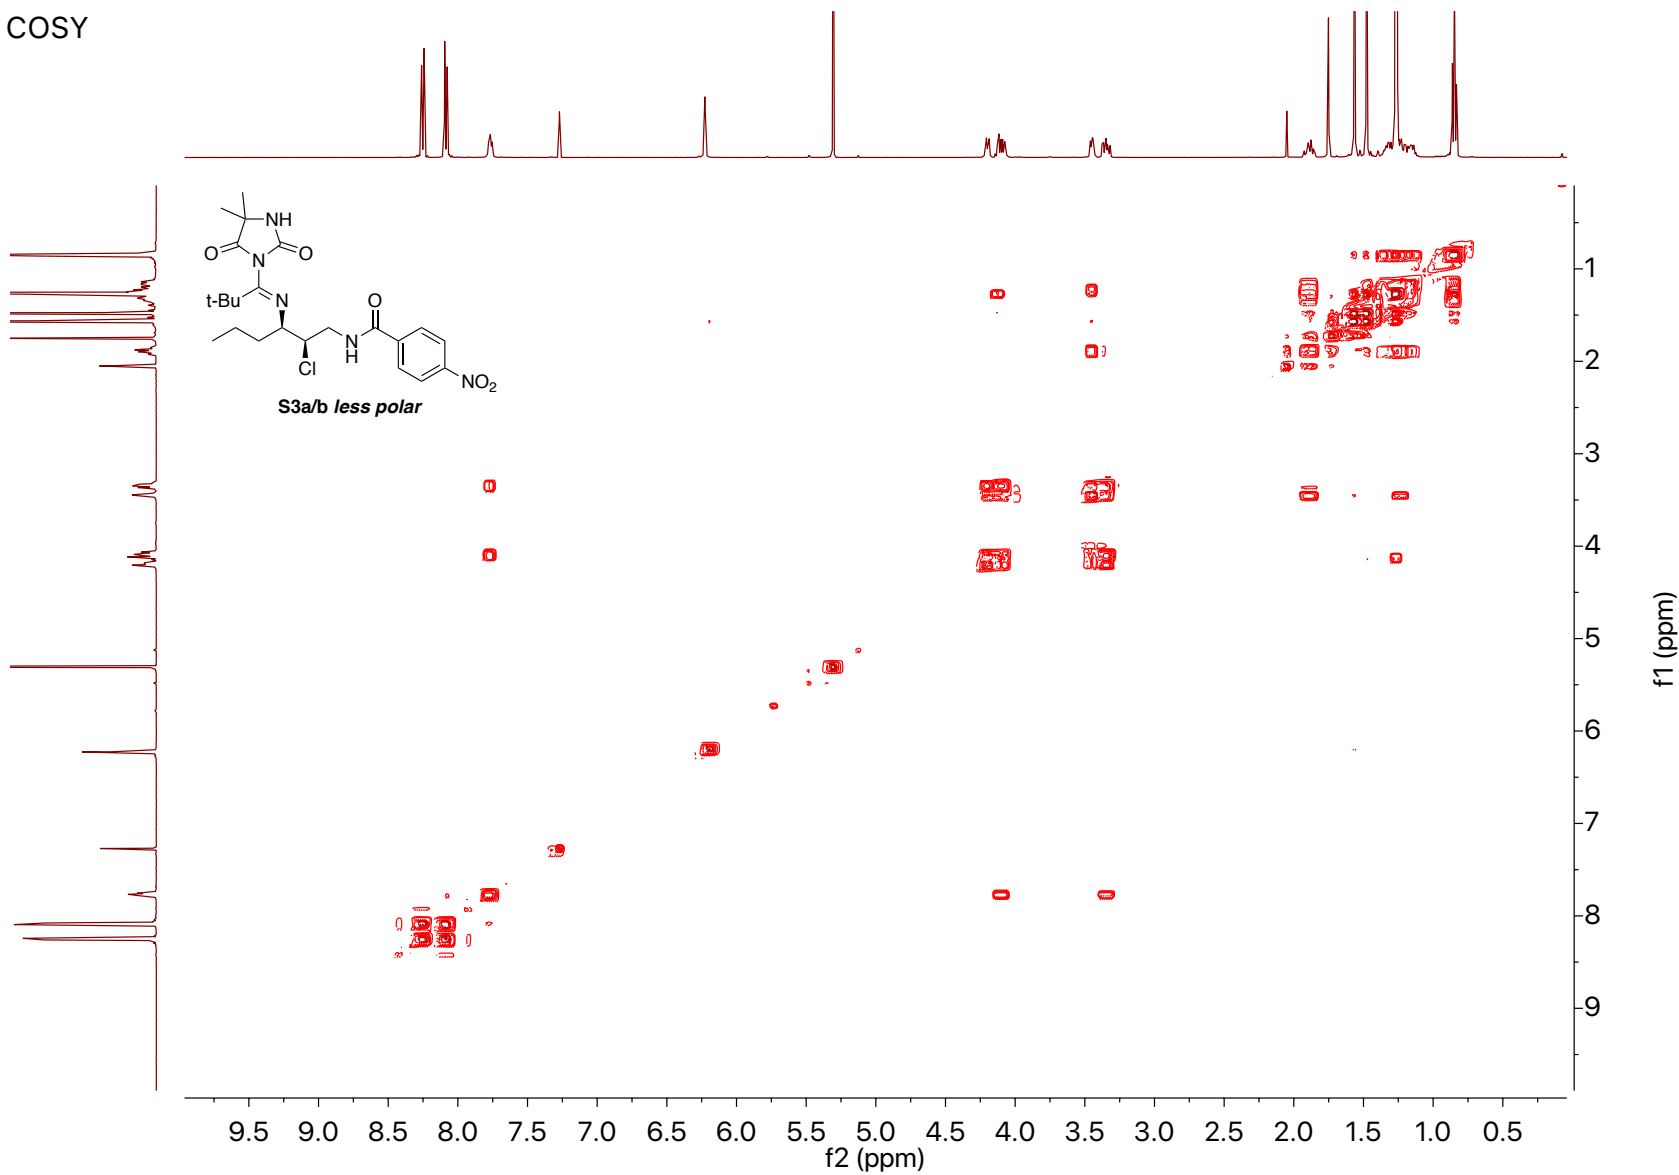

HSQC

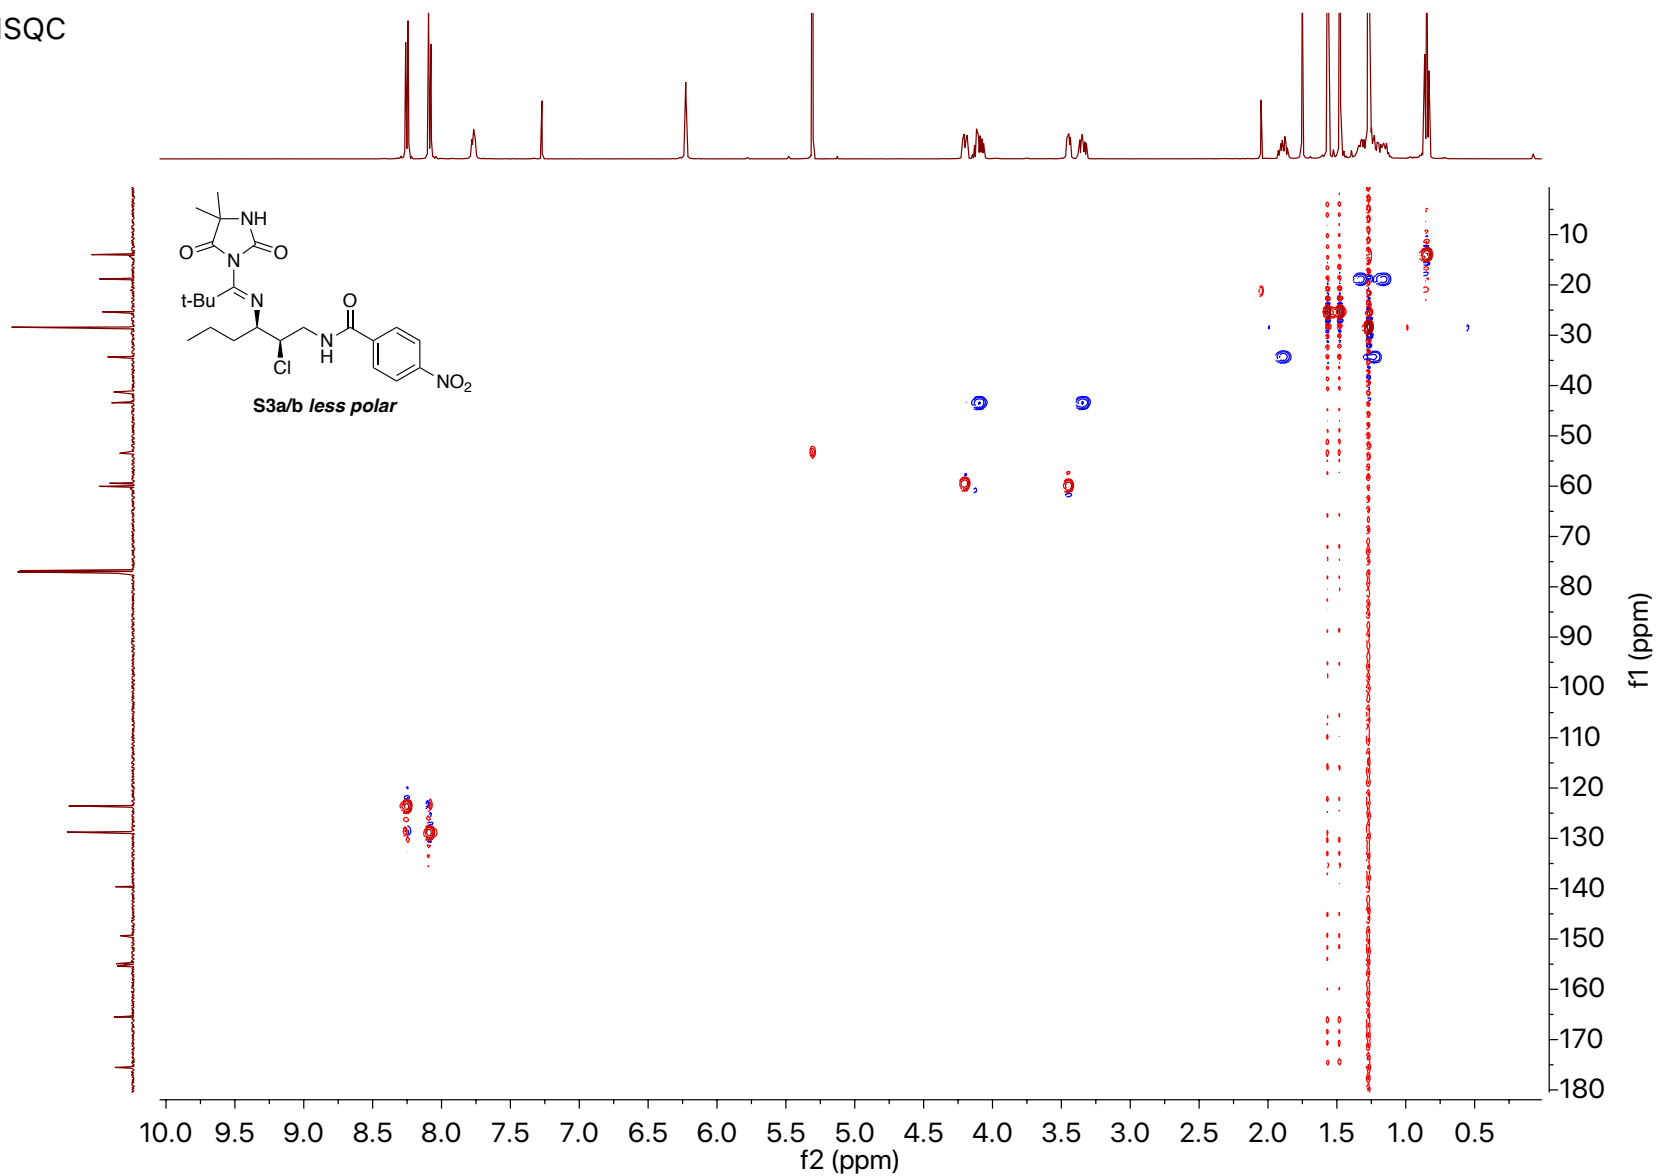

HMBC

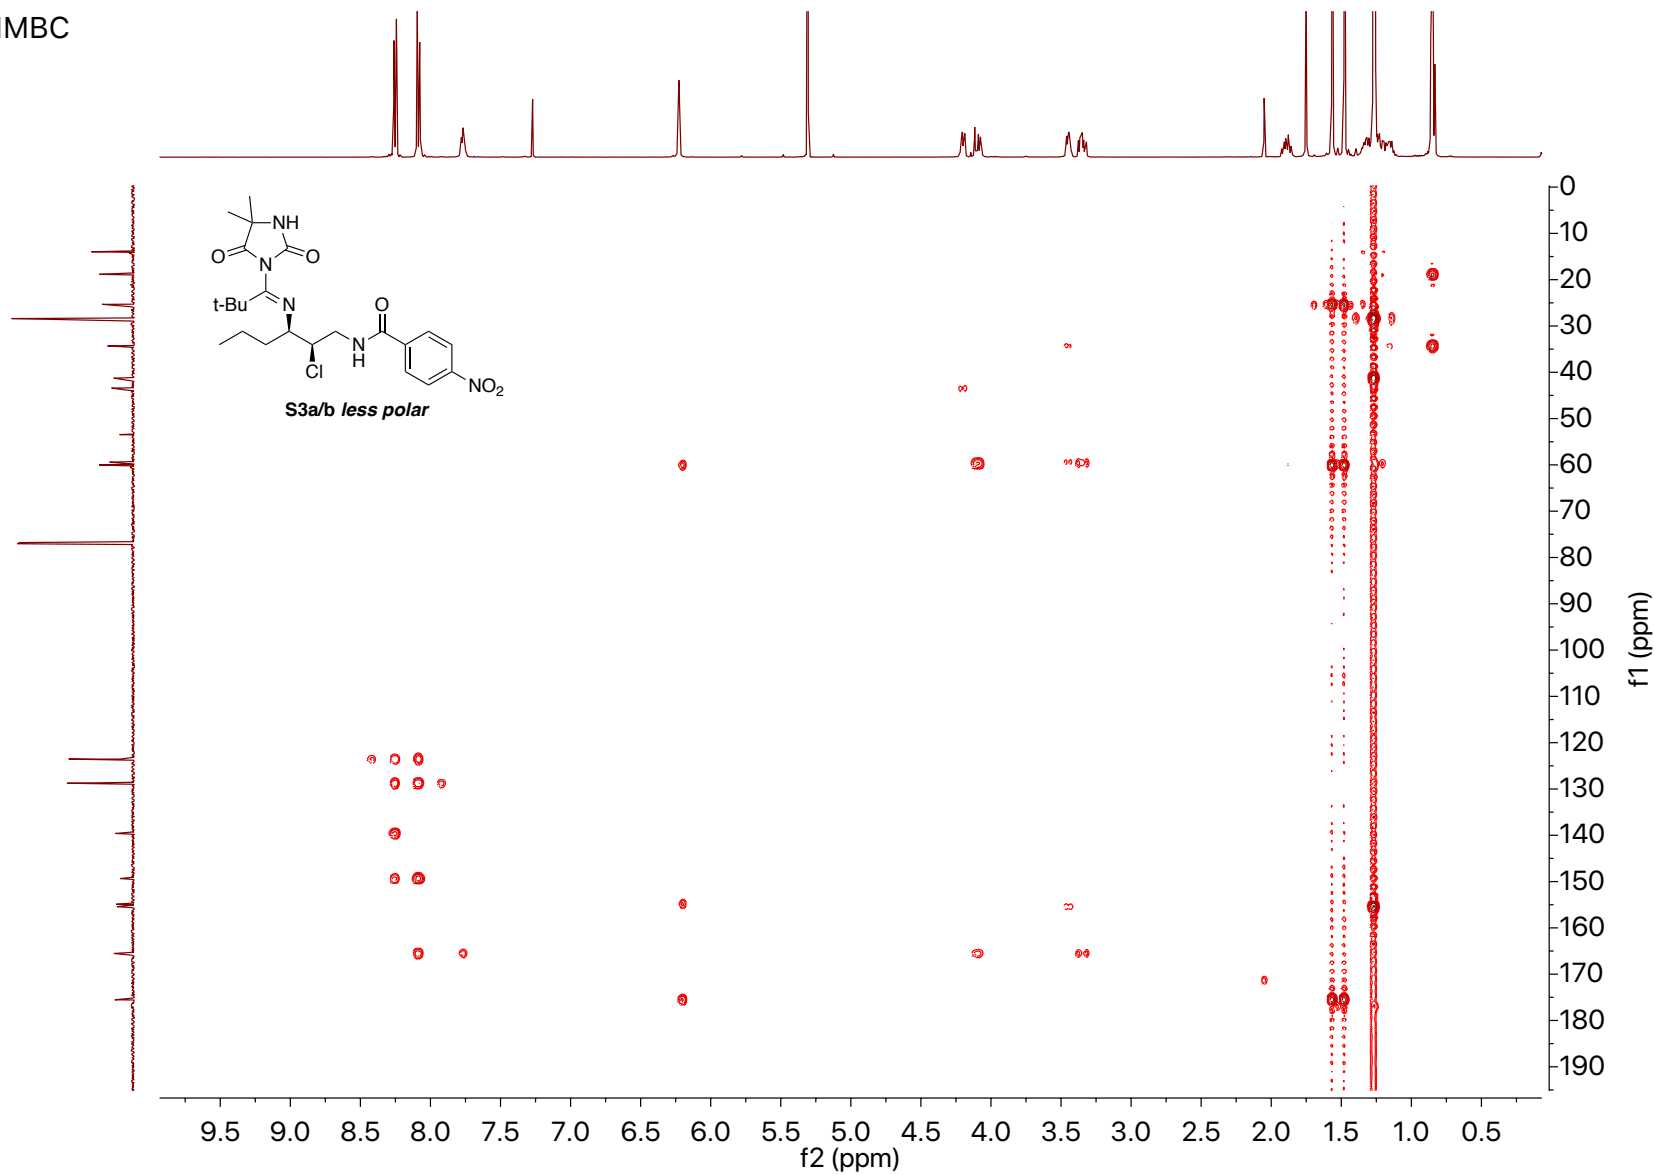

1H NMR (500 MHz, CDCl3)

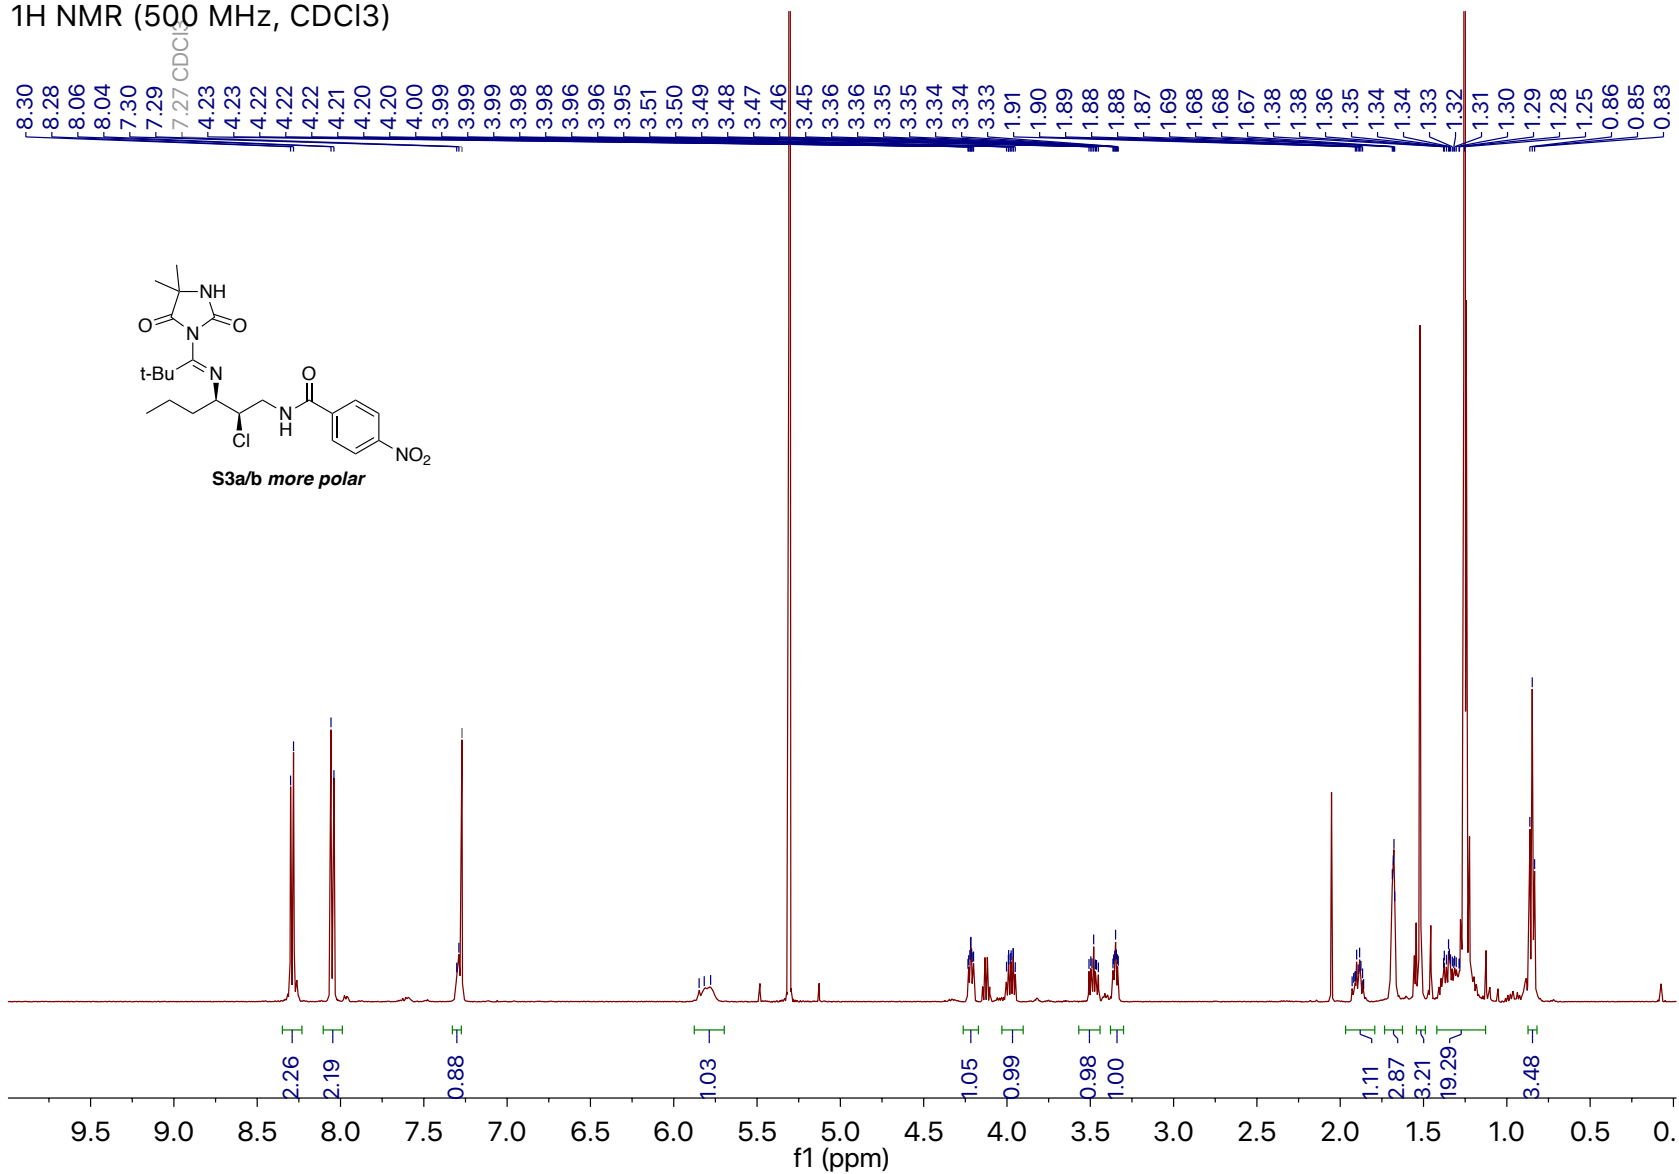

13C NMR (125 MHz, CDCl<sub>3</sub>)

- 176.99
- 165.60
- 155.34
- 153.49
- 149.62
- 139.52
- 128.67
- 128.64
- 123.56
- 77.03 CDCl<sub>3</sub>
- { 60.58
- { 59.69
- { 59.65
- 43.52
- 41.16
- 33.51
- 28.36
- 25.58
- 25.21
- 18.73
- 13.82

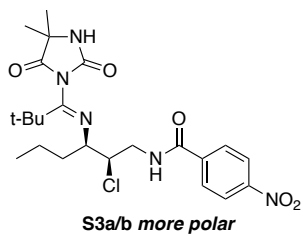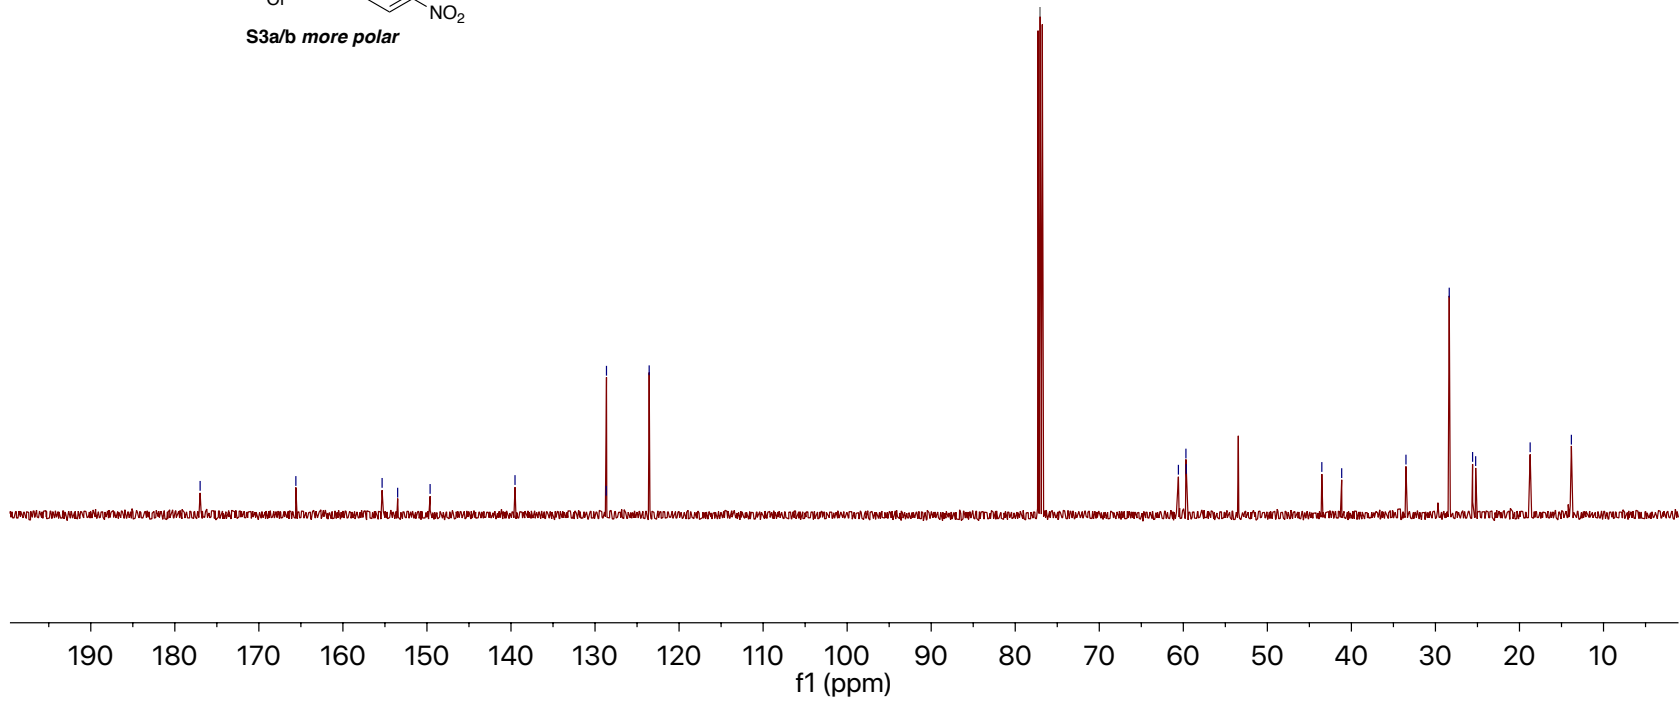

COSY

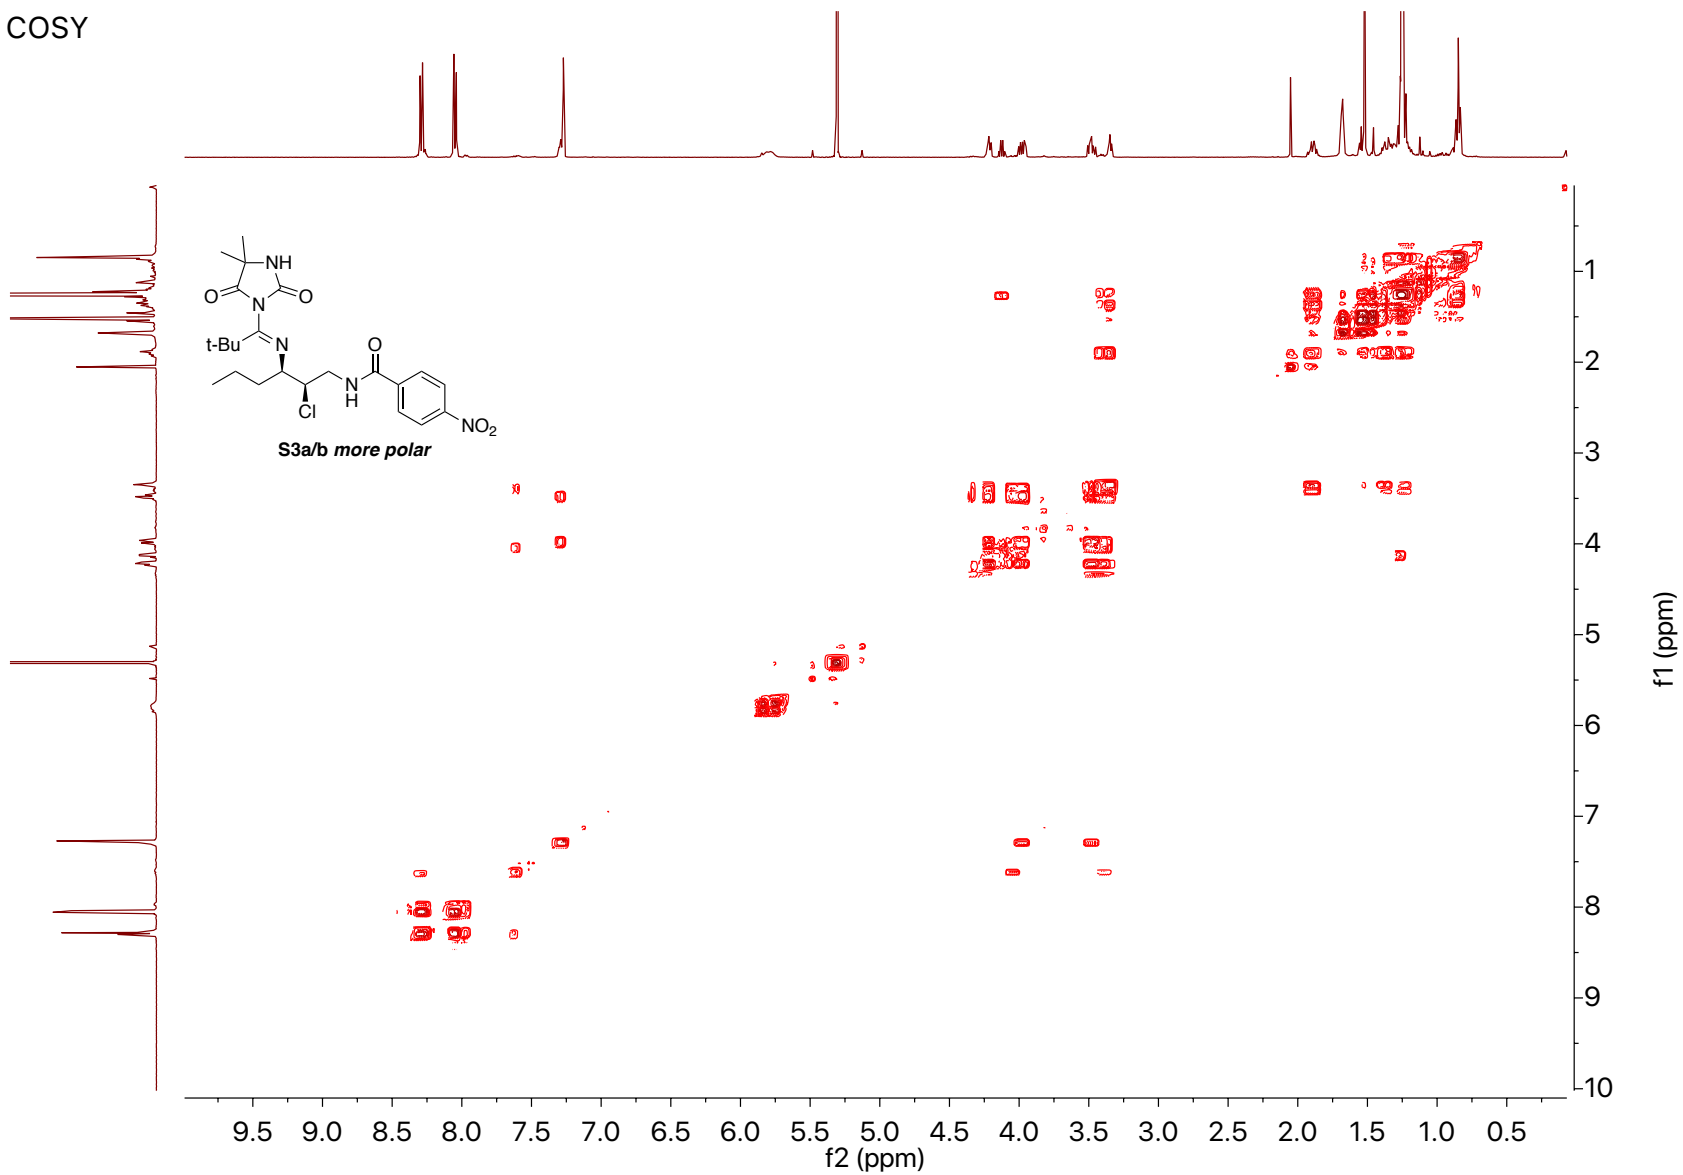

HSQC

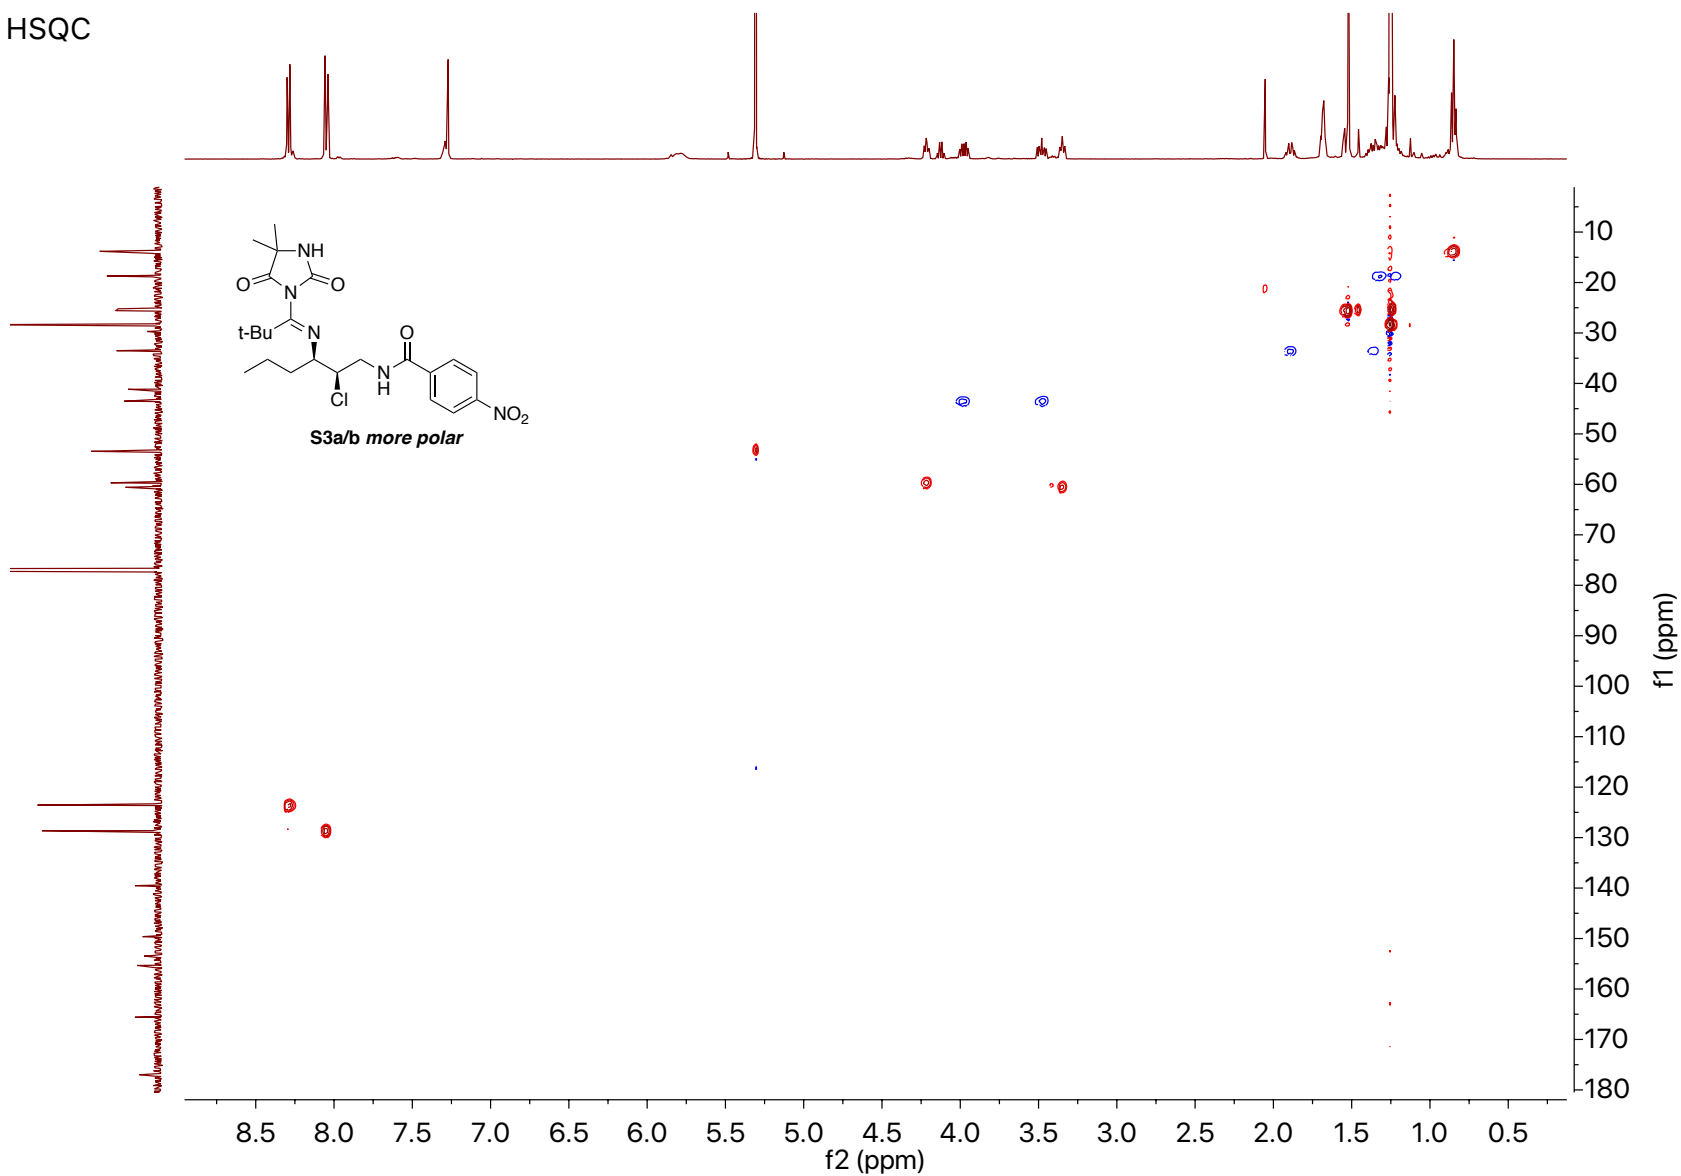

HMBC

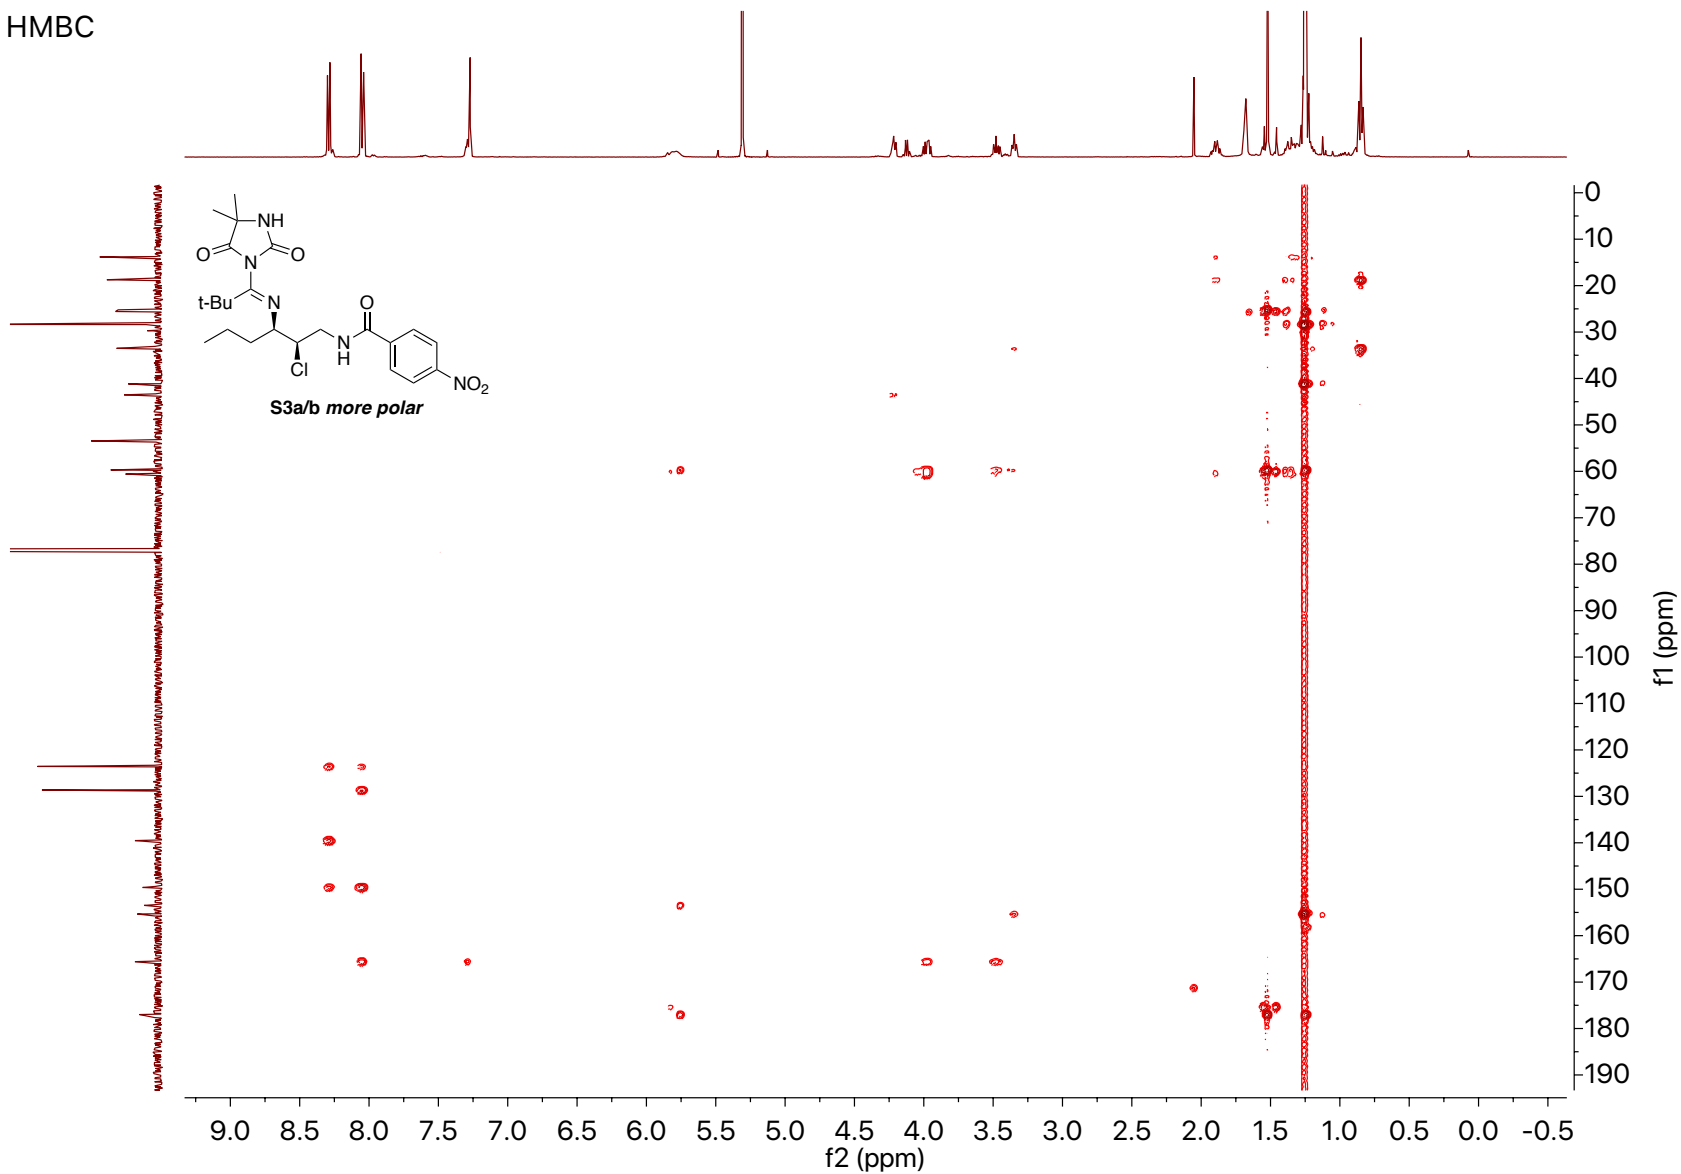



1H NMR (500 MHz, CDCl3)

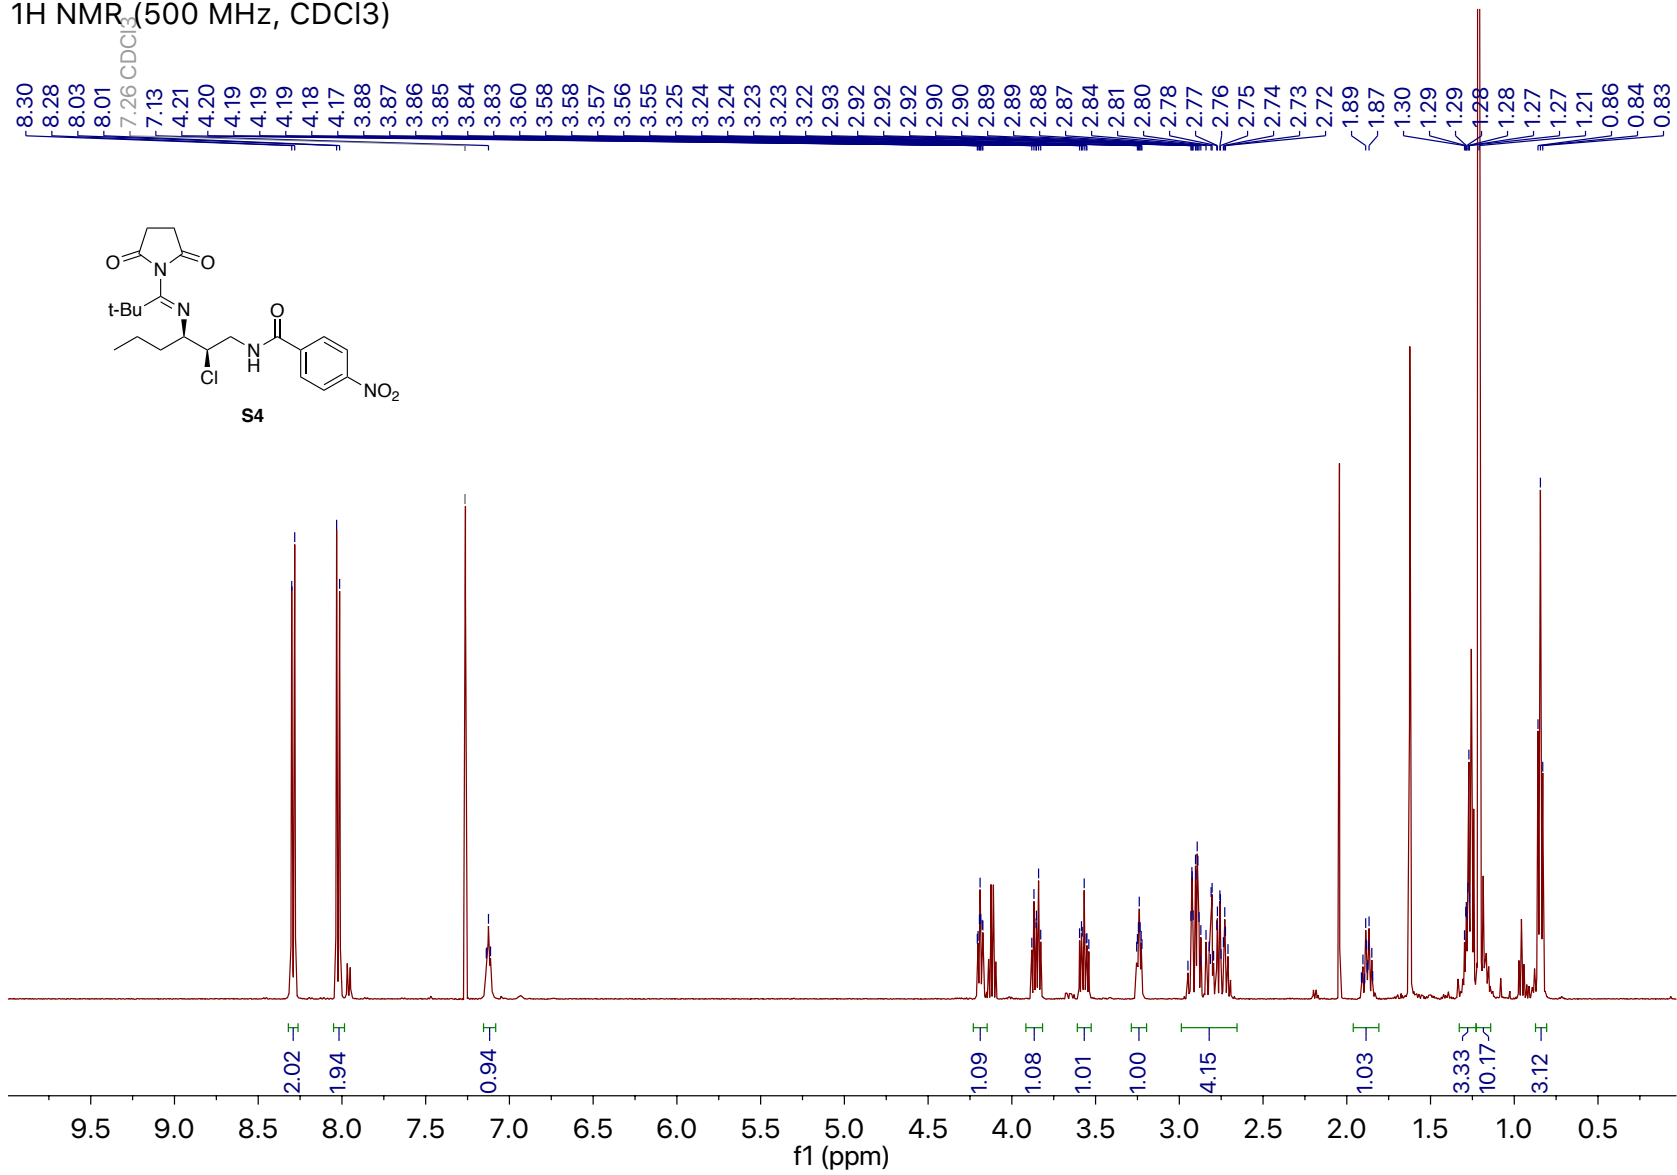

13C NMR (125 MHz, CDCl3)

- 176.60
- 175.08
- 165.39
- 156.45
- 149.63
- 139.49
- 128.46
- 123.69
- 77.02
- 76.99
- 76.96
- 61.33
- 60.25
- 43.59
- 40.76
- 33.64
- 28.72
- 28.70
- 28.40
- 18.73
- 13.89

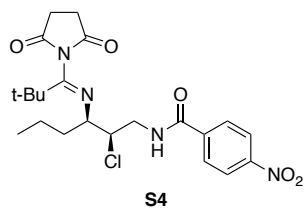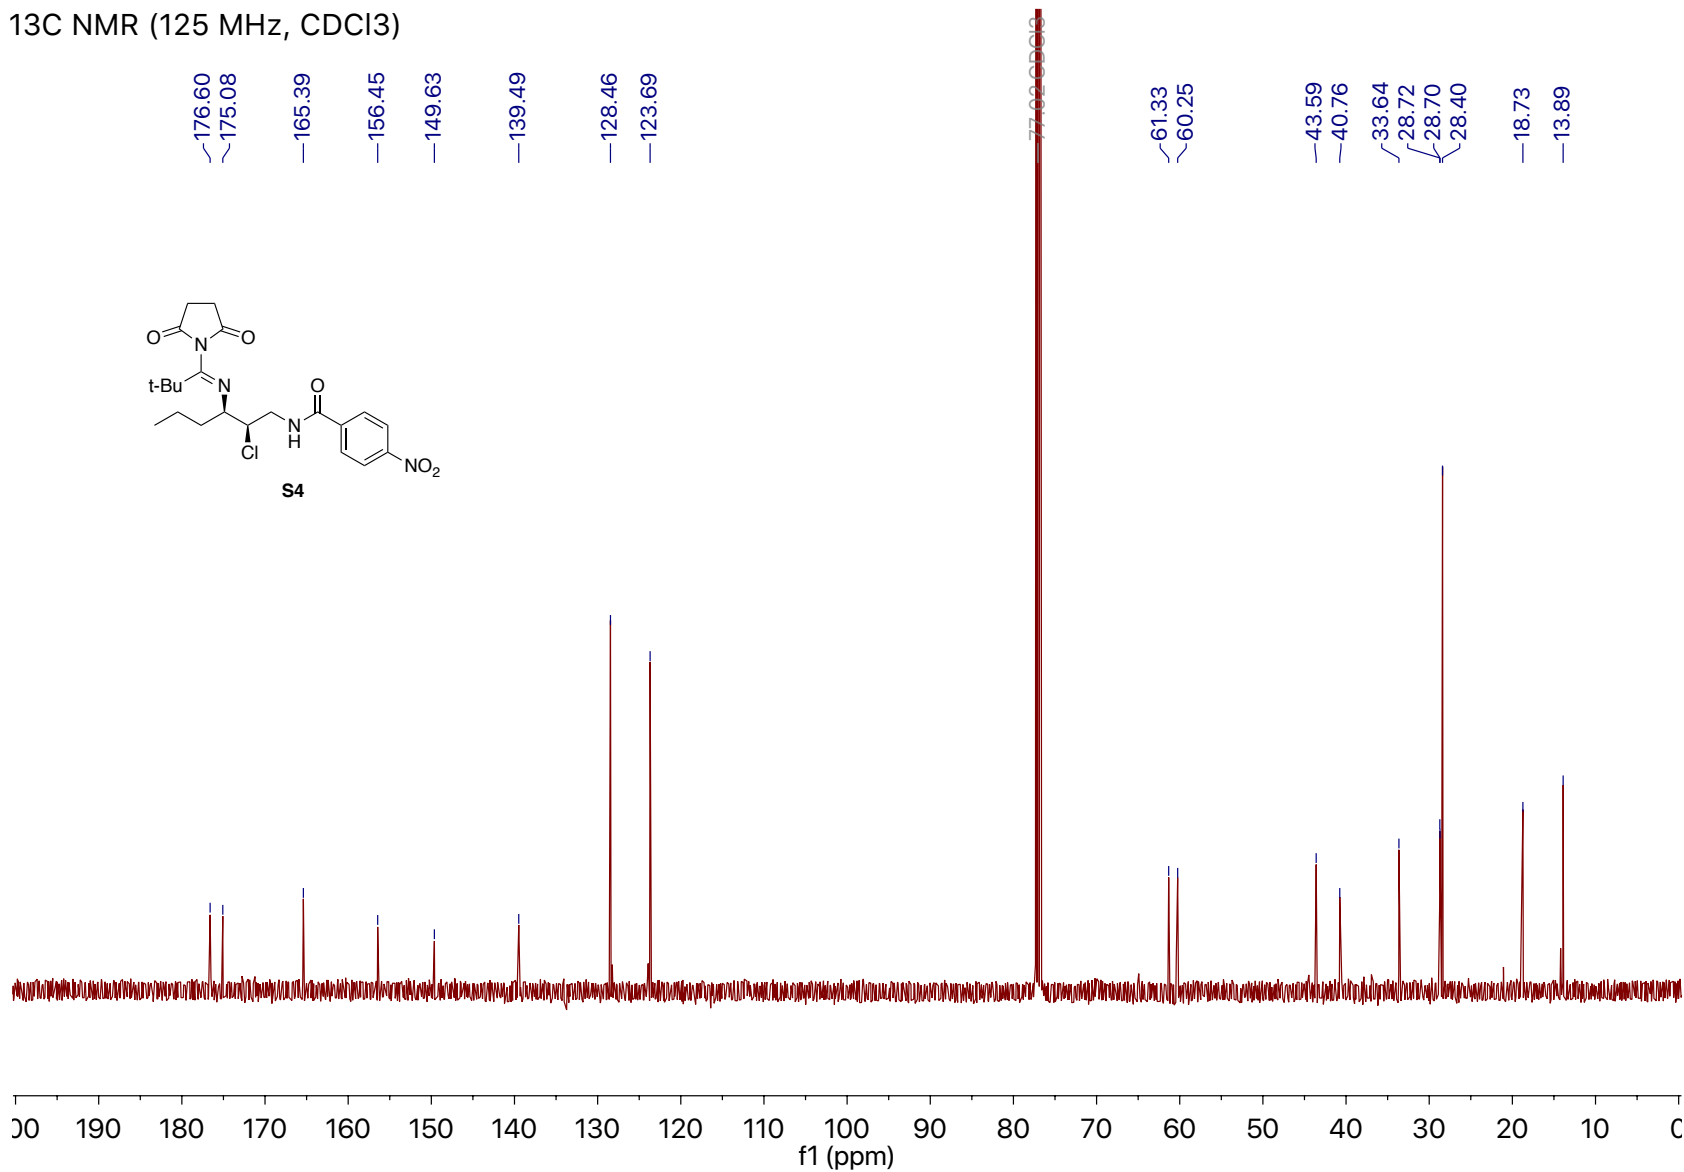

COSY

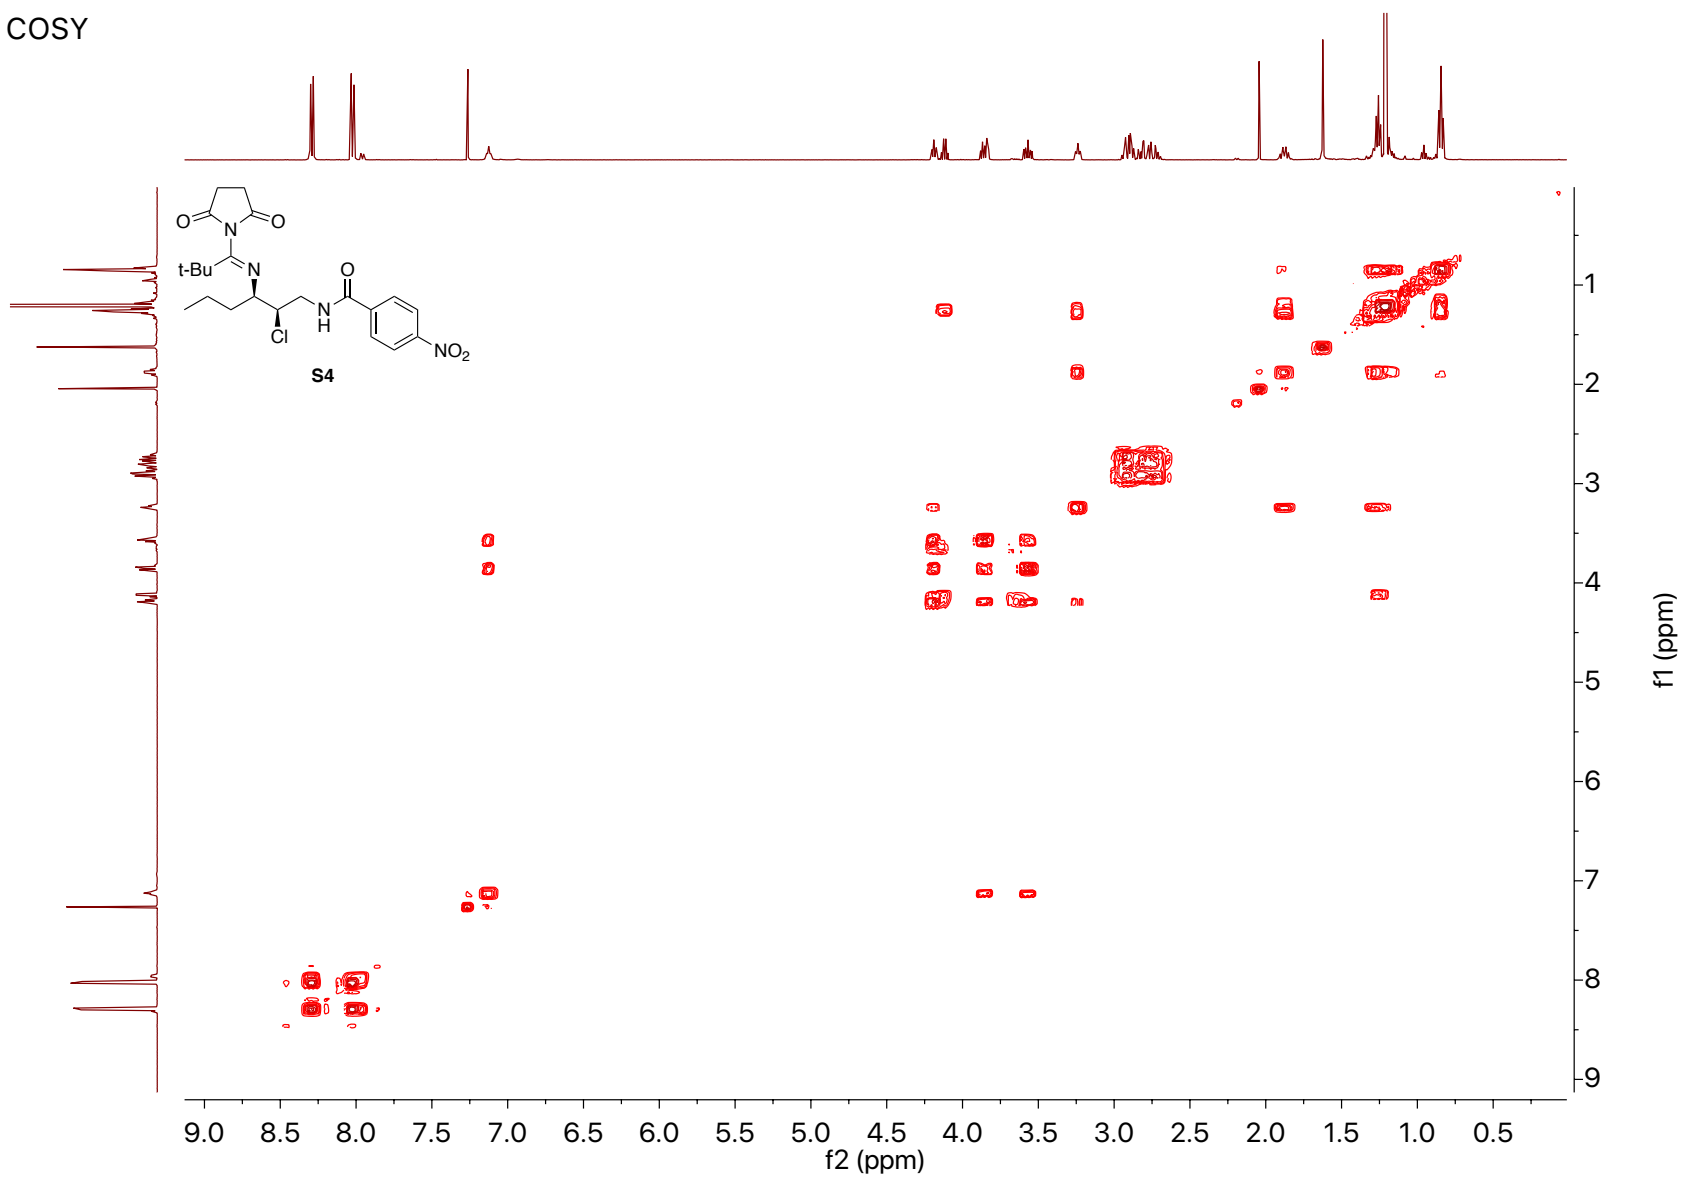

HSQC

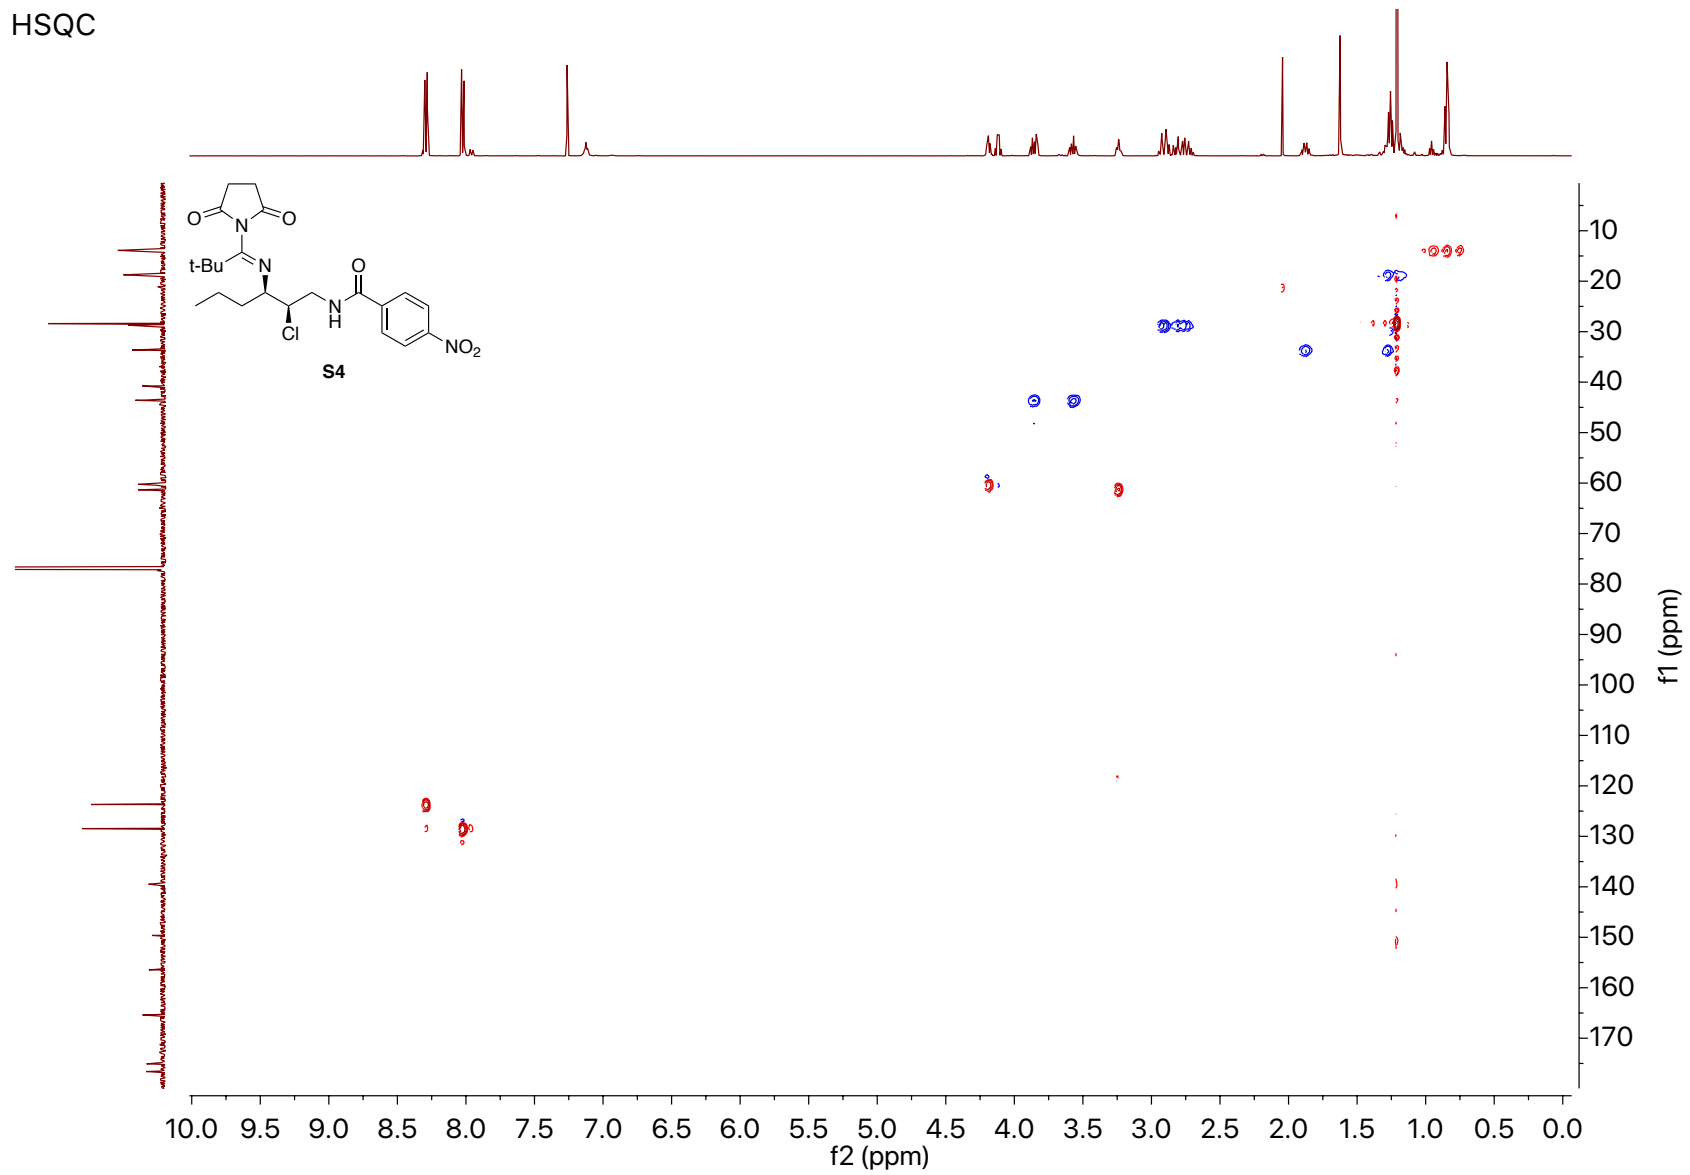

HMBC

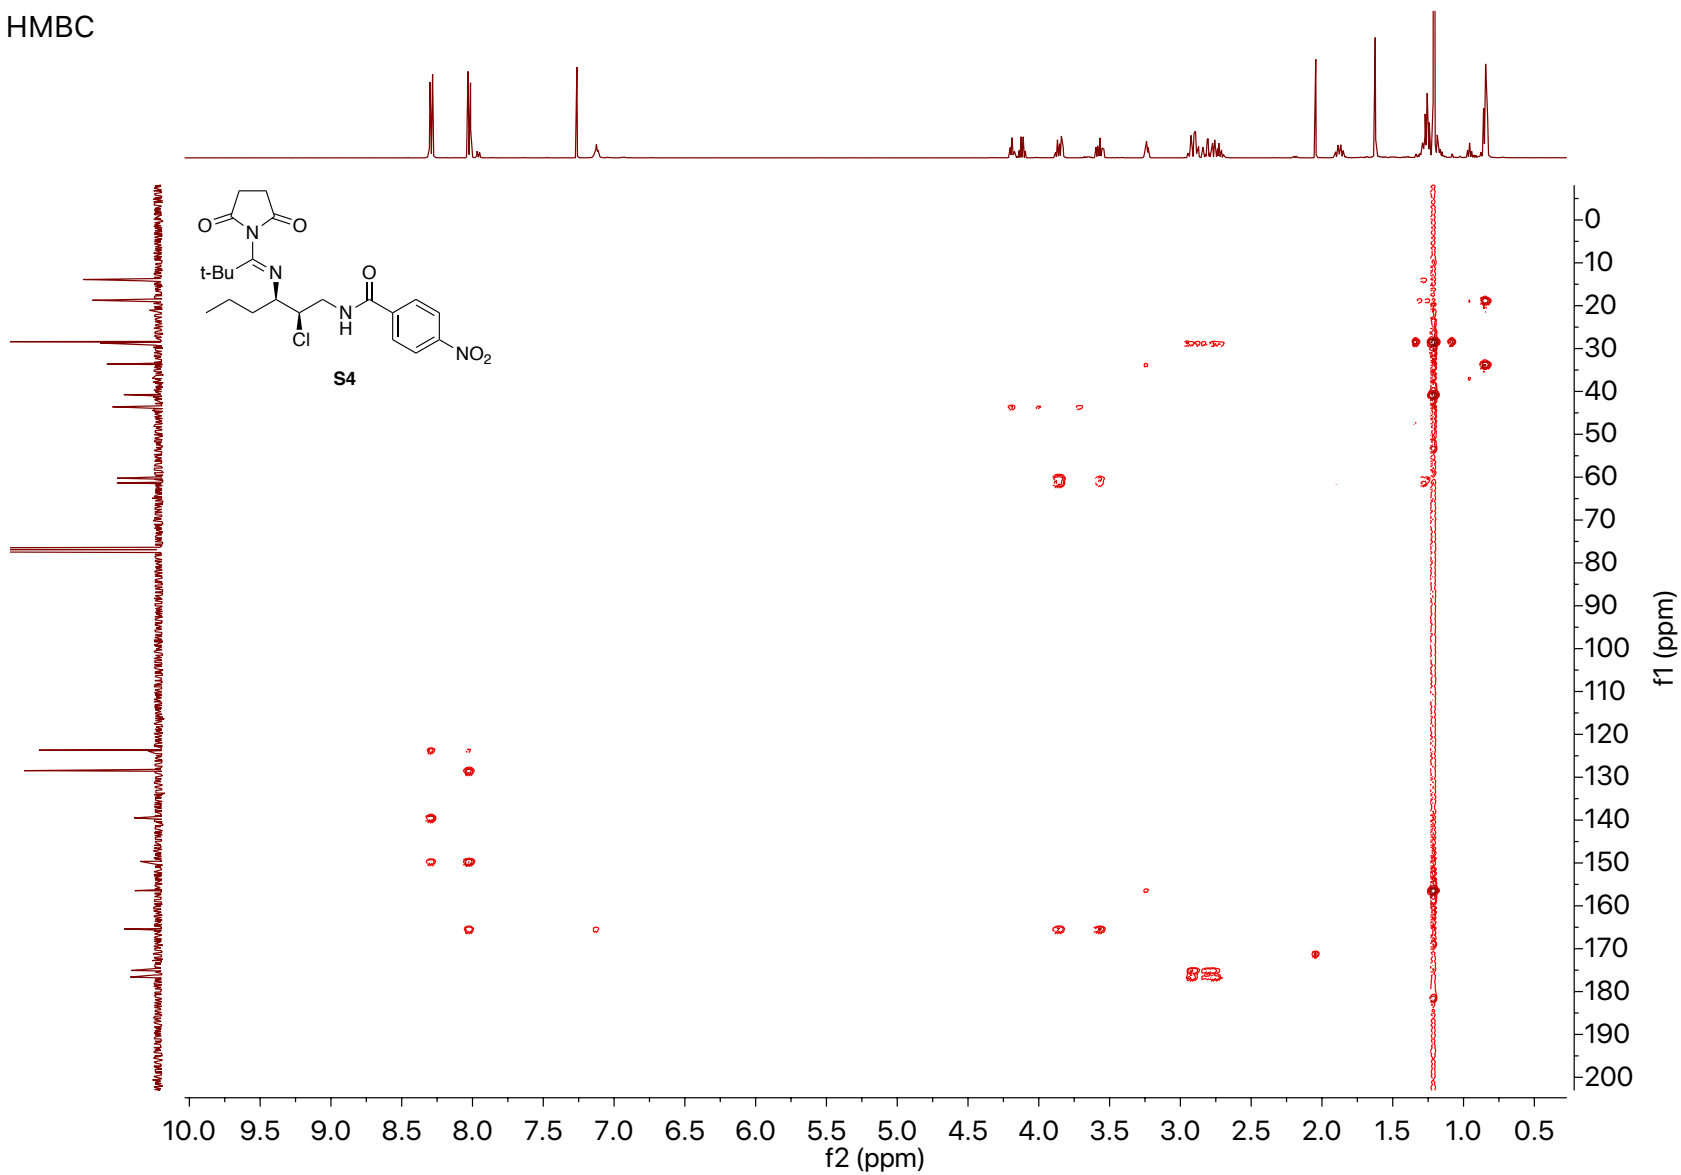

Supplement: d0sc05224h1.pdf [file d0sc05224h1.pdf]
